# Supplementary material for: Biota from the coastal wetlands of Praia da Vitória (Terceira, Azores, Portugal): Part 3 – Birds
Source: Biodivers Data J. 2019 May 28;7:e34327. doi: 10.3897/BDJ.7.e34327 (PMC6548749; doi:10.3897/BDJ.7.e34327)
Supplement: Supplementary material 1 — LIFE_CWR_Birds [file bdj-07-e34327-s001.xlsx]

## Sheet: Base Dados
ID	type	license	InstitutionCode	InstitutionID	datasetName	basisOfRecord	realm	country	archipelago	island	county	locality	verbatimCoordinates	decimalLatitude	decimalLongitude	geodeticDatum	minimumElevationInMeters	maximumElevationInMeters	eventDate	Year	recordedBy	individualCount	kingdom	phylum	class	order	family	Genus	specificEpithet	infraspecificEpithet	scientificName	scientificNameAuthorship	scientificNameAuthor	taxonRank	identifiedBy	dateidentified
12379	FieldObservation	https://creativecommons.org/licenses/by/4.0/legalcode	UAc	0a80feca-b411-428a-a34e-c5c2fa07cdba	Birds from Praia da Vitória marshes (Terceira, Azores, Portugal)	ObservedSpecimen	Palearctic	Portugal	Azores	Terceira	Praia da Vitória	Paul da Pedreira do Cabo da Praia	38°42'15,538"N, 27°2'47,222"W	38.7043	-27.0465	WGS84	3	10	27.09.2018	2018	LIFECWR TEAM	1	Animalia	Chordata	Aves	Charadriiformes	Scolopacidae	Actitis	macularius		Actitis macularius	(Linnaeus, 1766)	Actitis macularius (Linnaeus, 1766)	species	Sofia Goulart, Mariana R. Brito and Sónia Santos	2018
949	FieldObservation	https://creativecommons.org/licenses/by/4.0/legalcode	UAc	0a80feca-b411-428a-a34e-c5c2fa07cdba	Birds from Praia da Vitória marshes (Terceira, Azores, Portugal)	ObservedSpecimen	Palearctic	Portugal	Azores	Terceira	Praia da Vitória	Paul da Pedreira do Cabo da Praia	38°42'15,538"N, 27°2'47,222"W	38.7043	-27.0465	WGS84	3	10	2013.10.04	2013	LIFECWR TEAM	1	Animalia	Chordata	Aves	Charadriiformes	Scolopacidae	Actitis	hypoleucos		Actitis hypoleucos	(Linnaeus, 1758)	Actitis hypoleucos (Linnaeus, 1758)	species	Sofia Goulart, Mariana R. Brito and Sónia Santos	2013
1753	FieldObservation	https://creativecommons.org/licenses/by/4.0/legalcode	UAc	0a80feca-b411-428a-a34e-c5c2fa07cdba	Birds from Praia da Vitória marshes (Terceira, Azores, Portugal)	ObservedSpecimen	Palearctic	Portugal	Azores	Terceira	Praia da Vitória	Paul da Pedreira do Cabo da Praia	38°42'15,538"N, 27°2'47,222"W	38.7043	-27.0465	WGS84	3	10	2013.9.11	2013	LIFECWR TEAM	1	Animalia	Chordata	Aves	Charadriiformes	Scolopacidae	Actitis	hypoleucos		Actitis hypoleucos	(Linnaeus, 1758)	Actitis hypoleucos (Linnaeus, 1758)	species	Sofia Goulart, Mariana R. Brito and Sónia Santos	2013
1767	FieldObservation	https://creativecommons.org/licenses/by/4.0/legalcode	UAc	0a80feca-b411-428a-a34e-c5c2fa07cdba	Birds from Praia da Vitória marshes (Terceira, Azores, Portugal)	ObservedSpecimen	Palearctic	Portugal	Azores	Terceira	Praia da Vitória	Paul da Pedreira do Cabo da Praia	38°42'15,538"N, 27°2'47,222"W	38.7043	-27.0465	WGS84	3	10	2013.9.12	2013	LIFECWR TEAM	1	Animalia	Chordata	Aves	Charadriiformes	Scolopacidae	Actitis	hypoleucos		Actitis hypoleucos	(Linnaeus, 1758)	Actitis hypoleucos (Linnaeus, 1758)	species	Sofia Goulart, Mariana R. Brito and Sónia Santos	2013
1814	FieldObservation	https://creativecommons.org/licenses/by/4.0/legalcode	UAc	0a80feca-b411-428a-a34e-c5c2fa07cdba	Birds from Praia da Vitória marshes (Terceira, Azores, Portugal)	ObservedSpecimen	Palearctic	Portugal	Azores	Terceira	Praia da Vitória	Paul da Pedreira do Cabo da Praia	38°42'15,538"N, 27°2'47,222"W	38.7043	-27.0465	WGS84	3	10	2013.9.16	2013	LIFECWR TEAM	1	Animalia	Chordata	Aves	Charadriiformes	Scolopacidae	Actitis	hypoleucos		Actitis hypoleucos	(Linnaeus, 1758)	Actitis hypoleucos (Linnaeus, 1758)	species	Sofia Goulart, Mariana R. Brito and Sónia Santos	2013
1968	FieldObservation	https://creativecommons.org/licenses/by/4.0/legalcode	UAc	0a80feca-b411-428a-a34e-c5c2fa07cdba	Birds from Praia da Vitória marshes (Terceira, Azores, Portugal)	ObservedSpecimen	Palearctic	Portugal	Azores	Terceira	Praia da Vitória	Paul da Pedreira do Cabo da Praia	38°42'15,538"N, 27°2'47,222"W	38.7043	-27.0465	WGS84	3	10	2013.9.25	2013	LIFECWR TEAM	1	Animalia	Chordata	Aves	Charadriiformes	Scolopacidae	Actitis	hypoleucos		Actitis hypoleucos	(Linnaeus, 1758)	Actitis hypoleucos (Linnaeus, 1758)	species	Sofia Goulart, Mariana R. Brito and Sónia Santos	2013
1989	FieldObservation	https://creativecommons.org/licenses/by/4.0/legalcode	UAc	0a80feca-b411-428a-a34e-c5c2fa07cdba	Birds from Praia da Vitória marshes (Terceira, Azores, Portugal)	ObservedSpecimen	Palearctic	Portugal	Azores	Terceira	Praia da Vitória	Paul da Pedreira do Cabo da Praia	38°42'15,538"N, 27°2'47,222"W	38.7043	-27.0465	WGS84	3	10	2013.9.26	2013	LIFECWR TEAM	1	Animalia	Chordata	Aves	Charadriiformes	Scolopacidae	Actitis	hypoleucos		Actitis hypoleucos	(Linnaeus, 1758)	Actitis hypoleucos (Linnaeus, 1758)	species	Sofia Goulart, Mariana R. Brito and Sónia Santos	2013
2642	FieldObservation	https://creativecommons.org/licenses/by/4.0/legalcode	UAc	0a80feca-b411-428a-a34e-c5c2fa07cdba	Birds from Praia da Vitória marshes (Terceira, Azores, Portugal)	ObservedSpecimen	Palearctic	Portugal	Azores	Terceira	Praia da Vitória	Paul do Belo Jardim	38°42'48,315"N, 27°3'41,821"W	38.7134	-27.0616	WGS84	5	10	2014.10.30	2014	LIFECWR TEAM	1	Animalia	Chordata	Aves	Charadriiformes	Scolopacidae	Actitis	hypoleucos		Actitis hypoleucos	(Linnaeus, 1758)	Actitis hypoleucos (Linnaeus, 1758)	species	Sofia Goulart, Mariana R. Brito and Sónia Santos	2014
2754	FieldObservation	https://creativecommons.org/licenses/by/4.0/legalcode	UAc	0a80feca-b411-428a-a34e-c5c2fa07cdba	Birds from Praia da Vitória marshes (Terceira, Azores, Portugal)	ObservedSpecimen	Palearctic	Portugal	Azores	Terceira	Praia da Vitória	Paul da Pedreira do Cabo da Praia	38°42'15,538"N, 27°2'47,222"W	38.7043	-27.0465	WGS84	3	10	2014.11.12	2014	LIFECWR TEAM	1	Animalia	Chordata	Aves	Charadriiformes	Scolopacidae	Actitis	hypoleucos		Actitis hypoleucos	(Linnaeus, 1758)	Actitis hypoleucos (Linnaeus, 1758)	species	Sofia Goulart, Mariana R. Brito and Sónia Santos	2014
4481	FieldObservation	https://creativecommons.org/licenses/by/4.0/legalcode	UAc	0a80feca-b411-428a-a34e-c5c2fa07cdba	Birds from Praia da Vitória marshes (Terceira, Azores, Portugal)	ObservedSpecimen	Palearctic	Portugal	Azores	Terceira	Praia da Vitória	Paul da Pedreira do Cabo da Praia	38°42'15,538"N, 27°2'47,222"W	38.7043	-27.0465	WGS84	3	10	2014.9.3	2014	LIFECWR TEAM	1	Animalia	Chordata	Aves	Charadriiformes	Scolopacidae	Actitis	hypoleucos		Actitis hypoleucos	(Linnaeus, 1758)	Actitis hypoleucos (Linnaeus, 1758)	species	Sofia Goulart, Mariana R. Brito and Sónia Santos	2014
4503	FieldObservation	https://creativecommons.org/licenses/by/4.0/legalcode	UAc	0a80feca-b411-428a-a34e-c5c2fa07cdba	Birds from Praia da Vitória marshes (Terceira, Azores, Portugal)	ObservedSpecimen	Palearctic	Portugal	Azores	Terceira	Praia da Vitória	Paul da Pedreira do Cabo da Praia	38°42'15,538"N, 27°2'47,222"W	38.7043	-27.0465	WGS84	3	10	2014.9.4	2014	LIFECWR TEAM	1	Animalia	Chordata	Aves	Charadriiformes	Scolopacidae	Actitis	hypoleucos		Actitis hypoleucos	(Linnaeus, 1758)	Actitis hypoleucos (Linnaeus, 1758)	species	Sofia Goulart, Mariana R. Brito and Sónia Santos	2014
4882	FieldObservation	https://creativecommons.org/licenses/by/4.0/legalcode	UAc	0a80feca-b411-428a-a34e-c5c2fa07cdba	Birds from Praia da Vitória marshes (Terceira, Azores, Portugal)	ObservedSpecimen	Palearctic	Portugal	Azores	Terceira	Praia da Vitória	Paul da Praia da Vitória	38°44'5.915"N, 27°3'36.131"W	38.735	-27.06	WGS84	6	10	2015.1.6	2015	LIFECWR TEAM	1	Animalia	Chordata	Aves	Charadriiformes	Scolopacidae	Actitis	hypoleucos		Actitis hypoleucos	(Linnaeus, 1758)	Actitis hypoleucos (Linnaeus, 1758)	species	Sofia Goulart, Mariana R. Brito and Sónia Santos	2015
4909	FieldObservation	https://creativecommons.org/licenses/by/4.0/legalcode	UAc	0a80feca-b411-428a-a34e-c5c2fa07cdba	Birds from Praia da Vitória marshes (Terceira, Azores, Portugal)	ObservedSpecimen	Palearctic	Portugal	Azores	Terceira	Praia da Vitória	Paul da Praia da Vitória	38°44'5.915"N, 27°3'36.131"W	38.735	-27.06	WGS84	6	10	2015.1.7	2015	LIFECWR TEAM	1	Animalia	Chordata	Aves	Charadriiformes	Scolopacidae	Actitis	hypoleucos		Actitis hypoleucos	(Linnaeus, 1758)	Actitis hypoleucos (Linnaeus, 1758)	species	Sofia Goulart, Mariana R. Brito and Sónia Santos	2015
5076	FieldObservation	https://creativecommons.org/licenses/by/4.0/legalcode	UAc	0a80feca-b411-428a-a34e-c5c2fa07cdba	Birds from Praia da Vitória marshes (Terceira, Azores, Portugal)	ObservedSpecimen	Palearctic	Portugal	Azores	Terceira	Praia da Vitória	Paul da Pedreira do Cabo da Praia	38°42'15,538"N, 27°2'47,222"W	38.7043	-27.0465	WGS84	3	10	2015.10.2	2015	LIFECWR TEAM	1	Animalia	Chordata	Aves	Charadriiformes	Scolopacidae	Actitis	hypoleucos		Actitis hypoleucos	(Linnaeus, 1758)	Actitis hypoleucos (Linnaeus, 1758)	species	Sofia Goulart, Mariana R. Brito and Sónia Santos	2015
7388	FieldObservation	https://creativecommons.org/licenses/by/4.0/legalcode	UAc	0a80feca-b411-428a-a34e-c5c2fa07cdba	Birds from Praia da Vitória marshes (Terceira, Azores, Portugal)	ObservedSpecimen	Palearctic	Portugal	Azores	Terceira	Praia da Vitória	Paul da Pedreira do Cabo da Praia	38°42'15,538"N, 27°2'47,222"W	38.7043	-27.0465	WGS84	3	10	2015.9.22	2015	LIFECWR TEAM	1	Animalia	Chordata	Aves	Charadriiformes	Scolopacidae	Actitis	hypoleucos		Actitis hypoleucos	(Linnaeus, 1758)	Actitis hypoleucos (Linnaeus, 1758)	species	Sofia Goulart, Mariana R. Brito and Sónia Santos	2015
7410	FieldObservation	https://creativecommons.org/licenses/by/4.0/legalcode	UAc	0a80feca-b411-428a-a34e-c5c2fa07cdba	Birds from Praia da Vitória marshes (Terceira, Azores, Portugal)	ObservedSpecimen	Palearctic	Portugal	Azores	Terceira	Praia da Vitória	Paul da Pedreira do Cabo da Praia	38°42'15,538"N, 27°2'47,222"W	38.7043	-27.0465	WGS84	3	10	2015.9.23	2015	LIFECWR TEAM	1	Animalia	Chordata	Aves	Charadriiformes	Scolopacidae	Actitis	hypoleucos		Actitis hypoleucos	(Linnaeus, 1758)	Actitis hypoleucos (Linnaeus, 1758)	species	Sofia Goulart, Mariana R. Brito and Sónia Santos	2015
7490	FieldObservation	https://creativecommons.org/licenses/by/4.0/legalcode	UAc	0a80feca-b411-428a-a34e-c5c2fa07cdba	Birds from Praia da Vitória marshes (Terceira, Azores, Portugal)	ObservedSpecimen	Palearctic	Portugal	Azores	Terceira	Praia da Vitória	Paul da Pedreira do Cabo da Praia	38°42'15,538"N, 27°2'47,222"W	38.7043	-27.0465	WGS84	3	10	2015.9.29	2015	LIFECWR TEAM	1	Animalia	Chordata	Aves	Charadriiformes	Scolopacidae	Actitis	hypoleucos		Actitis hypoleucos	(Linnaeus, 1758)	Actitis hypoleucos (Linnaeus, 1758)	species	Sofia Goulart, Mariana R. Brito and Sónia Santos	2015
8065	FieldObservation	https://creativecommons.org/licenses/by/4.0/legalcode	UAc	0a80feca-b411-428a-a34e-c5c2fa07cdba	Birds from Praia da Vitória marshes (Terceira, Azores, Portugal)	ObservedSpecimen	Palearctic	Portugal	Azores	Terceira	Praia da Vitória	Paul da Praia da Vitória	38°44'5.915"N, 27°3'36.131"W	38.735	-27.06	WGS84	6	10	2016.10.12	2016	LIFECWR TEAM	1	Animalia	Chordata	Aves	Charadriiformes	Scolopacidae	Actitis	hypoleucos		Actitis hypoleucos	(Linnaeus, 1758)	Actitis hypoleucos (Linnaeus, 1758)	species	Sofia Goulart, Mariana R. Brito and Sónia Santos	2016
10340	FieldObservation	https://creativecommons.org/licenses/by/4.0/legalcode	UAc	0a80feca-b411-428a-a34e-c5c2fa07cdba	Birds from Praia da Vitória marshes (Terceira, Azores, Portugal)	ObservedSpecimen	Palearctic	Portugal	Azores	Terceira	Praia da Vitória	Paul da Pedreira do Cabo da Praia	38°42'15,538"N, 27°2'47,222"W	38.7043	-27.0465	WGS84	3	10	2017.11.27	2017	LIFECWR TEAM	1	Animalia	Chordata	Aves	Charadriiformes	Scolopacidae	Actitis	hypoleucos		Actitis hypoleucos	(Linnaeus, 1758)	Actitis hypoleucos (Linnaeus, 1758)	species	Sofia Goulart, Mariana R. Brito and Sónia Santos	2017
2021	FieldObservation	https://creativecommons.org/licenses/by/4.0/legalcode	UAc	0a80feca-b411-428a-a34e-c5c2fa07cdba	Birds from Praia da Vitória marshes (Terceira, Azores, Portugal)	ObservedSpecimen	Palearctic	Portugal	Azores	Terceira	Praia da Vitória	Paul da Pedreira do Cabo da Praia	38°42'15,538"N, 27°2'47,222"W	38.7043	-27.0465	WGS84	3	10	2013.9.3	2013	LIFECWR TEAM	1	Animalia	Chordata	Aves	Charadriiformes	Scolopacidae	Actitis	macularius		Actitis macularius	(Linnaeus, 1766)	Actitis macularius (Linnaeus, 1766)	species	Sofia Goulart, Mariana R. Brito and Sónia Santos	2013
4523	FieldObservation	https://creativecommons.org/licenses/by/4.0/legalcode	UAc	0a80feca-b411-428a-a34e-c5c2fa07cdba	Birds from Praia da Vitória marshes (Terceira, Azores, Portugal)	ObservedSpecimen	Palearctic	Portugal	Azores	Terceira	Praia da Vitória	Paul da Pedreira do Cabo da Praia	38°42'15,538"N, 27°2'47,222"W	38.7043	-27.0465	WGS84	3	10	2014.9.5	2014	LIFECWR TEAM	1	Animalia	Chordata	Aves	Charadriiformes	Scolopacidae	Actitis	macularius		Actitis macularius	(Linnaeus, 1766)	Actitis macularius (Linnaeus, 1766)	species	Sofia Goulart, Mariana R. Brito and Sónia Santos	2014
4524	FieldObservation	https://creativecommons.org/licenses/by/4.0/legalcode	UAc	0a80feca-b411-428a-a34e-c5c2fa07cdba	Birds from Praia da Vitória marshes (Terceira, Azores, Portugal)	ObservedSpecimen	Palearctic	Portugal	Azores	Terceira	Praia da Vitória	Paul da Pedreira do Cabo da Praia	38°42'15,538"N, 27°2'47,222"W	38.7043	-27.0465	WGS84	3	10	2014.9.5	2014	LIFECWR TEAM	1	Animalia	Chordata	Aves	Anseriformes	Anatidae	Aix	galericulata		Aix galericulata	(Linnaeus, 1758)	Aix galericulata (Linnaeus, 1758)	species	Sofia Goulart, Mariana R. Brito and Sónia Santos	2014
7825	FieldObservation	https://creativecommons.org/licenses/by/4.0/legalcode	UAc	0a80feca-b411-428a-a34e-c5c2fa07cdba	Birds from Praia da Vitória marshes (Terceira, Azores, Portugal)	ObservedSpecimen	Palearctic	Portugal	Azores	Terceira	Praia da Vitória	Paul da Praia da Vitória	38°44'5.915"N, 27°3'36.131"W	38.735	-27.06	WGS84	6	10	2016.1.27	2016	LIFECWR TEAM	1	Animalia	Chordata	Aves	Anseriformes	Anatidae	Aix	sponsa		Aix sponsa	(Linnaeus, 1758)	Aix sponsa (Linnaeus, 1758)	species	Sofia Goulart, Mariana R. Brito and Sónia Santos	2016
18	FieldObservation	https://creativecommons.org/licenses/by/4.0/legalcode	UAc	0a80feca-b411-428a-a34e-c5c2fa07cdba	Birds from Praia da Vitória marshes (Terceira, Azores, Portugal)	ObservedSpecimen	Palearctic	Portugal	Azores	Terceira	Praia da Vitória	Paul do Belo Jardim	38°42'48,315"N, 27°3'41,821"W	38.7134	-27.0616	WGS84	5	10	2018.10.01	2018	LIFECWR TEAM	1	Animalia	Chordata	Aves	Anseriformes	Anatidae	Anas	acuta		Anas acuta	Linnaeus, 1758	Anas acuta Linnaeus, 1758	species	Sofia Goulart, Mariana R. Brito and Sónia Santos	2018
102	FieldObservation	https://creativecommons.org/licenses/by/4.0/legalcode	UAc	0a80feca-b411-428a-a34e-c5c2fa07cdba	Birds from Praia da Vitória marshes (Terceira, Azores, Portugal)	ObservedSpecimen	Palearctic	Portugal	Azores	Terceira	Praia da Vitória	Paul da Pedreira do Cabo da Praia	38°42'15,538"N, 27°2'47,222"W	38.7043	-27.0465	WGS84	3	10	2018.10.03	2018	LIFECWR TEAM	1	Animalia	Chordata	Aves	Anseriformes	Anatidae	Anas	acuta		Anas acuta	Linnaeus, 1758	Anas acuta Linnaeus, 1758	species	Sofia Goulart, Mariana R. Brito and Sónia Santos	2018
204	FieldObservation	https://creativecommons.org/licenses/by/4.0/legalcode	UAc	0a80feca-b411-428a-a34e-c5c2fa07cdba	Birds from Praia da Vitória marshes (Terceira, Azores, Portugal)	ObservedSpecimen	Palearctic	Portugal	Azores	Terceira	Praia da Vitória	Paul da Praia da Vitória	38°44'5.915"N, 27°3'36.131"W	38.735	-27.06	WGS84	6	10	2018.02.08	2018	LIFECWR TEAM	1	Animalia	Chordata	Aves	Anseriformes	Anatidae	Anas	acuta		Anas acuta	Linnaeus, 1758	Anas acuta Linnaeus, 1758	species	Sofia Goulart, Mariana R. Brito and Sónia Santos	2018
379	FieldObservation	https://creativecommons.org/licenses/by/4.0/legalcode	UAc	0a80feca-b411-428a-a34e-c5c2fa07cdba	Birds from Praia da Vitória marshes (Terceira, Azores, Portugal)	ObservedSpecimen	Palearctic	Portugal	Azores	Terceira	Praia da Vitória	Paul da Praia da Vitória	38°44'5.915"N, 27°3'36.131"W	38.735	-27.06	WGS84	6	10	2018.02.15	2018	LIFECWR TEAM	1	Animalia	Chordata	Aves	Anseriformes	Anatidae	Anas	acuta		Anas acuta	Linnaeus, 1758	Anas acuta Linnaeus, 1758	species	Sofia Goulart, Mariana R. Brito and Sónia Santos	2018
607	FieldObservation	https://creativecommons.org/licenses/by/4.0/legalcode	UAc	0a80feca-b411-428a-a34e-c5c2fa07cdba	Birds from Praia da Vitória marshes (Terceira, Azores, Portugal)	ObservedSpecimen	Palearctic	Portugal	Azores	Terceira	Praia da Vitória	Paul da Pedreira do Cabo da Praia	38°42'15,538"N, 27°2'47,222"W	38.7043	-27.0465	WGS84	3	10	2013.10.01	2013	LIFECWR TEAM	2	Animalia	Chordata	Aves	Anseriformes	Anatidae	Anas	acuta		Anas acuta	Linnaeus, 1758	Anas acuta Linnaeus, 1758	species	Sofia Goulart, Mariana R. Brito and Sónia Santos	2013
732	FieldObservation	https://creativecommons.org/licenses/by/4.0/legalcode	UAc	0a80feca-b411-428a-a34e-c5c2fa07cdba	Birds from Praia da Vitória marshes (Terceira, Azores, Portugal)	ObservedSpecimen	Palearctic	Portugal	Azores	Terceira	Praia da Vitória	Paul da Pedreira do Cabo da Praia	38°42'15,538"N, 27°2'47,222"W	38.7043	-27.0465	WGS84	3	10	2013.10.18	2013	LIFECWR TEAM	1	Animalia	Chordata	Aves	Anseriformes	Anatidae	Anas	acuta		Anas acuta	Linnaeus, 1758	Anas acuta Linnaeus, 1758	species	Sofia Goulart, Mariana R. Brito and Sónia Santos	2013
778	FieldObservation	https://creativecommons.org/licenses/by/4.0/legalcode	UAc	0a80feca-b411-428a-a34e-c5c2fa07cdba	Birds from Praia da Vitória marshes (Terceira, Azores, Portugal)	ObservedSpecimen	Palearctic	Portugal	Azores	Terceira	Praia da Vitória	Paul da Pedreira do Cabo da Praia	38°42'15,538"N, 27°2'47,222"W	38.7043	-27.0465	WGS84	3	10	2013.10.22	2013	LIFECWR TEAM	2	Animalia	Chordata	Aves	Anseriformes	Anatidae	Anas	acuta		Anas acuta	Linnaeus, 1758	Anas acuta Linnaeus, 1758	species	Sofia Goulart, Mariana R. Brito and Sónia Santos	2013
857	FieldObservation	https://creativecommons.org/licenses/by/4.0/legalcode	UAc	0a80feca-b411-428a-a34e-c5c2fa07cdba	Birds from Praia da Vitória marshes (Terceira, Azores, Portugal)	ObservedSpecimen	Palearctic	Portugal	Azores	Terceira	Praia da Vitória	Paul da Pedreira do Cabo da Praia	38°42'15,538"N, 27°2'47,222"W	38.7043	-27.0465	WGS84	3	10	2013.10.28	2013	LIFECWR TEAM	1	Animalia	Chordata	Aves	Anseriformes	Anatidae	Anas	acuta		Anas acuta	Linnaeus, 1758	Anas acuta Linnaeus, 1758	species	Sofia Goulart, Mariana R. Brito and Sónia Santos	2013
880	FieldObservation	https://creativecommons.org/licenses/by/4.0/legalcode	UAc	0a80feca-b411-428a-a34e-c5c2fa07cdba	Birds from Praia da Vitória marshes (Terceira, Azores, Portugal)	ObservedSpecimen	Palearctic	Portugal	Azores	Terceira	Praia da Vitória	Paul da Pedreira do Cabo da Praia	38°42'15,538"N, 27°2'47,222"W	38.7043	-27.0465	WGS84	3	10	2013.10.29	2013	LIFECWR TEAM	2	Animalia	Chordata	Aves	Anseriformes	Anatidae	Anas	acuta		Anas acuta	Linnaeus, 1758	Anas acuta Linnaeus, 1758	species	Sofia Goulart, Mariana R. Brito and Sónia Santos	2013
898	FieldObservation	https://creativecommons.org/licenses/by/4.0/legalcode	UAc	0a80feca-b411-428a-a34e-c5c2fa07cdba	Birds from Praia da Vitória marshes (Terceira, Azores, Portugal)	ObservedSpecimen	Palearctic	Portugal	Azores	Terceira	Praia da Vitória	Paul da Pedreira do Cabo da Praia	38°42'15,538"N, 27°2'47,222"W	38.7043	-27.0465	WGS84	3	10	2013.10.03	2013	LIFECWR TEAM	2	Animalia	Chordata	Aves	Anseriformes	Anatidae	Anas	acuta		Anas acuta	Linnaeus, 1758	Anas acuta Linnaeus, 1758	species	Sofia Goulart, Mariana R. Brito and Sónia Santos	2013
950	FieldObservation	https://creativecommons.org/licenses/by/4.0/legalcode	UAc	0a80feca-b411-428a-a34e-c5c2fa07cdba	Birds from Praia da Vitória marshes (Terceira, Azores, Portugal)	ObservedSpecimen	Palearctic	Portugal	Azores	Terceira	Praia da Vitória	Paul da Pedreira do Cabo da Praia	38°42'15,538"N, 27°2'47,222"W	38.7043	-27.0465	WGS84	3	10	2013.10.04	2013	LIFECWR TEAM	2	Animalia	Chordata	Aves	Anseriformes	Anatidae	Anas	acuta		Anas acuta	Linnaeus, 1758	Anas acuta Linnaeus, 1758	species	Sofia Goulart, Mariana R. Brito and Sónia Santos	2013
979	FieldObservation	https://creativecommons.org/licenses/by/4.0/legalcode	UAc	0a80feca-b411-428a-a34e-c5c2fa07cdba	Birds from Praia da Vitória marshes (Terceira, Azores, Portugal)	ObservedSpecimen	Palearctic	Portugal	Azores	Terceira	Praia da Vitória	Paul da Pedreira do Cabo da Praia	38°42'15,538"N, 27°2'47,222"W	38.7043	-27.0465	WGS84	3	10	2013.10.07	2013	LIFECWR TEAM	1	Animalia	Chordata	Aves	Anseriformes	Anatidae	Anas	acuta		Anas acuta	Linnaeus, 1758	Anas acuta Linnaeus, 1758	species	Sofia Goulart, Mariana R. Brito and Sónia Santos	2013
1003	FieldObservation	https://creativecommons.org/licenses/by/4.0/legalcode	UAc	0a80feca-b411-428a-a34e-c5c2fa07cdba	Birds from Praia da Vitória marshes (Terceira, Azores, Portugal)	ObservedSpecimen	Palearctic	Portugal	Azores	Terceira	Praia da Vitória	Paul da Pedreira do Cabo da Praia	38°42'15,538"N, 27°2'47,222"W	38.7043	-27.0465	WGS84	3	10	2013.11.01	2013	LIFECWR TEAM	2	Animalia	Chordata	Aves	Anseriformes	Anatidae	Anas	acuta		Anas acuta	Linnaeus, 1758	Anas acuta Linnaeus, 1758	species	Sofia Goulart, Mariana R. Brito and Sónia Santos	2013
1026	FieldObservation	https://creativecommons.org/licenses/by/4.0/legalcode	UAc	0a80feca-b411-428a-a34e-c5c2fa07cdba	Birds from Praia da Vitória marshes (Terceira, Azores, Portugal)	ObservedSpecimen	Palearctic	Portugal	Azores	Terceira	Praia da Vitória	Paul da Pedreira do Cabo da Praia	38°42'15,538"N, 27°2'47,222"W	38.7043	-27.0465	WGS84	3	10	2013.11.11	2013	LIFECWR TEAM	1	Animalia	Chordata	Aves	Anseriformes	Anatidae	Anas	acuta		Anas acuta	Linnaeus, 1758	Anas acuta Linnaeus, 1758	species	Sofia Goulart, Mariana R. Brito and Sónia Santos	2013
1928	FieldObservation	https://creativecommons.org/licenses/by/4.0/legalcode	UAc	0a80feca-b411-428a-a34e-c5c2fa07cdba	Birds from Praia da Vitória marshes (Terceira, Azores, Portugal)	ObservedSpecimen	Palearctic	Portugal	Azores	Terceira	Praia da Vitória	Paul da Pedreira do Cabo da Praia	38°42'15,538"N, 27°2'47,222"W	38.7043	-27.0465	WGS84	3	10	2013.9.23	2013	LIFECWR TEAM	1	Animalia	Chordata	Aves	Anseriformes	Anatidae	Anas	acuta		Anas acuta	Linnaeus, 1758	Anas acuta Linnaeus, 1758	species	Sofia Goulart, Mariana R. Brito and Sónia Santos	2013
1950	FieldObservation	https://creativecommons.org/licenses/by/4.0/legalcode	UAc	0a80feca-b411-428a-a34e-c5c2fa07cdba	Birds from Praia da Vitória marshes (Terceira, Azores, Portugal)	ObservedSpecimen	Palearctic	Portugal	Azores	Terceira	Praia da Vitória	Paul da Pedreira do Cabo da Praia	38°42'15,538"N, 27°2'47,222"W	38.7043	-27.0465	WGS84	3	10	2013.9.24	2013	LIFECWR TEAM	1	Animalia	Chordata	Aves	Anseriformes	Anatidae	Anas	acuta		Anas acuta	Linnaeus, 1758	Anas acuta Linnaeus, 1758	species	Sofia Goulart, Mariana R. Brito and Sónia Santos	2013
1969	FieldObservation	https://creativecommons.org/licenses/by/4.0/legalcode	UAc	0a80feca-b411-428a-a34e-c5c2fa07cdba	Birds from Praia da Vitória marshes (Terceira, Azores, Portugal)	ObservedSpecimen	Palearctic	Portugal	Azores	Terceira	Praia da Vitória	Paul da Pedreira do Cabo da Praia	38°42'15,538"N, 27°2'47,222"W	38.7043	-27.0465	WGS84	3	10	2013.9.25	2013	LIFECWR TEAM	1	Animalia	Chordata	Aves	Anseriformes	Anatidae	Anas	acuta		Anas acuta	Linnaeus, 1758	Anas acuta Linnaeus, 1758	species	Sofia Goulart, Mariana R. Brito and Sónia Santos	2013
2033	FieldObservation	https://creativecommons.org/licenses/by/4.0/legalcode	UAc	0a80feca-b411-428a-a34e-c5c2fa07cdba	Birds from Praia da Vitória marshes (Terceira, Azores, Portugal)	ObservedSpecimen	Palearctic	Portugal	Azores	Terceira	Praia da Vitória	Paul da Pedreira do Cabo da Praia	38°42'15,538"N, 27°2'47,222"W	38.7043	-27.0465	WGS84	3	10	2013.9.30	2013	LIFECWR TEAM	2	Animalia	Chordata	Aves	Anseriformes	Anatidae	Anas	acuta		Anas acuta	Linnaeus, 1758	Anas acuta Linnaeus, 1758	species	Sofia Goulart, Mariana R. Brito and Sónia Santos	2013
4990	FieldObservation	https://creativecommons.org/licenses/by/4.0/legalcode	UAc	0a80feca-b411-428a-a34e-c5c2fa07cdba	Birds from Praia da Vitória marshes (Terceira, Azores, Portugal)	ObservedSpecimen	Palearctic	Portugal	Azores	Terceira	Praia da Vitória	Paul da Pedreira do Cabo da Praia	38°42'15,538"N, 27°2'47,222"W	38.7043	-27.0465	WGS84	3	10	2015.10.12	2015	LIFECWR TEAM	5	Animalia	Chordata	Aves	Anseriformes	Anatidae	Anas	acuta		Anas acuta	Linnaeus, 1758	Anas acuta Linnaeus, 1758	species	Sofia Goulart, Mariana R. Brito and Sónia Santos	2015
5012	FieldObservation	https://creativecommons.org/licenses/by/4.0/legalcode	UAc	0a80feca-b411-428a-a34e-c5c2fa07cdba	Birds from Praia da Vitória marshes (Terceira, Azores, Portugal)	ObservedSpecimen	Palearctic	Portugal	Azores	Terceira	Praia da Vitória	Paul da Pedreira do Cabo da Praia	38°42'15,538"N, 27°2'47,222"W	38.7043	-27.0465	WGS84	3	10	2015.10.13	2015	LIFECWR TEAM	4	Animalia	Chordata	Aves	Anseriformes	Anatidae	Anas	acuta		Anas acuta	Linnaeus, 1758	Anas acuta Linnaeus, 1758	species	Sofia Goulart, Mariana R. Brito and Sónia Santos	2015
5038	FieldObservation	https://creativecommons.org/licenses/by/4.0/legalcode	UAc	0a80feca-b411-428a-a34e-c5c2fa07cdba	Birds from Praia da Vitória marshes (Terceira, Azores, Portugal)	ObservedSpecimen	Palearctic	Portugal	Azores	Terceira	Praia da Vitória	Paul da Pedreira do Cabo da Praia	38°42'15,538"N, 27°2'47,222"W	38.7043	-27.0465	WGS84	3	10	2015.10.16	2015	LIFECWR TEAM	4	Animalia	Chordata	Aves	Anseriformes	Anatidae	Anas	acuta		Anas acuta	Linnaeus, 1758	Anas acuta Linnaeus, 1758	species	Sofia Goulart, Mariana R. Brito and Sónia Santos	2015
5058	FieldObservation	https://creativecommons.org/licenses/by/4.0/legalcode	UAc	0a80feca-b411-428a-a34e-c5c2fa07cdba	Birds from Praia da Vitória marshes (Terceira, Azores, Portugal)	ObservedSpecimen	Palearctic	Portugal	Azores	Terceira	Praia da Vitória	Paul da Pedreira do Cabo da Praia	38°42'15,538"N, 27°2'47,222"W	38.7043	-27.0465	WGS84	3	10	2015.10.19	2015	LIFECWR TEAM	5	Animalia	Chordata	Aves	Anseriformes	Anatidae	Anas	acuta		Anas acuta	Linnaeus, 1758	Anas acuta Linnaeus, 1758	species	Sofia Goulart, Mariana R. Brito and Sónia Santos	2015
5102	FieldObservation	https://creativecommons.org/licenses/by/4.0/legalcode	UAc	0a80feca-b411-428a-a34e-c5c2fa07cdba	Birds from Praia da Vitória marshes (Terceira, Azores, Portugal)	ObservedSpecimen	Palearctic	Portugal	Azores	Terceira	Praia da Vitória	Paul da Pedreira do Cabo da Praia	38°42'15,538"N, 27°2'47,222"W	38.7043	-27.0465	WGS84	3	10	2015.10.22	2015	LIFECWR TEAM	5	Animalia	Chordata	Aves	Anseriformes	Anatidae	Anas	acuta		Anas acuta	Linnaeus, 1758	Anas acuta Linnaeus, 1758	species	Sofia Goulart, Mariana R. Brito and Sónia Santos	2015
5124	FieldObservation	https://creativecommons.org/licenses/by/4.0/legalcode	UAc	0a80feca-b411-428a-a34e-c5c2fa07cdba	Birds from Praia da Vitória marshes (Terceira, Azores, Portugal)	ObservedSpecimen	Palearctic	Portugal	Azores	Terceira	Praia da Vitória	Paul da Pedreira do Cabo da Praia	38°42'15,538"N, 27°2'47,222"W	38.7043	-27.0465	WGS84	3	10	2015.10.23	2015	LIFECWR TEAM	2	Animalia	Chordata	Aves	Anseriformes	Anatidae	Anas	acuta		Anas acuta	Linnaeus, 1758	Anas acuta Linnaeus, 1758	species	Sofia Goulart, Mariana R. Brito and Sónia Santos	2015
5154	FieldObservation	https://creativecommons.org/licenses/by/4.0/legalcode	UAc	0a80feca-b411-428a-a34e-c5c2fa07cdba	Birds from Praia da Vitória marshes (Terceira, Azores, Portugal)	ObservedSpecimen	Palearctic	Portugal	Azores	Terceira	Praia da Vitória	Paul da Praia da Vitória	38°44'5.915"N, 27°3'36.131"W	38.735	-27.06	WGS84	6	10	2015.10.27	2015	LIFECWR TEAM	2	Animalia	Chordata	Aves	Anseriformes	Anatidae	Anas	acuta		Anas acuta	Linnaeus, 1758	Anas acuta Linnaeus, 1758	species	Sofia Goulart, Mariana R. Brito and Sónia Santos	2015
5175	FieldObservation	https://creativecommons.org/licenses/by/4.0/legalcode	UAc	0a80feca-b411-428a-a34e-c5c2fa07cdba	Birds from Praia da Vitória marshes (Terceira, Azores, Portugal)	ObservedSpecimen	Palearctic	Portugal	Azores	Terceira	Praia da Vitória	Paul da Praia da Vitória	38°44'5.915"N, 27°3'36.131"W	38.735	-27.06	WGS84	6	10	2015.10.28	2015	LIFECWR TEAM	2	Animalia	Chordata	Aves	Anseriformes	Anatidae	Anas	acuta		Anas acuta	Linnaeus, 1758	Anas acuta Linnaeus, 1758	species	Sofia Goulart, Mariana R. Brito and Sónia Santos	2015
5218	FieldObservation	https://creativecommons.org/licenses/by/4.0/legalcode	UAc	0a80feca-b411-428a-a34e-c5c2fa07cdba	Birds from Praia da Vitória marshes (Terceira, Azores, Portugal)	ObservedSpecimen	Palearctic	Portugal	Azores	Terceira	Praia da Vitória	Paul da Praia da Vitória	38°44'5.915"N, 27°3'36.131"W	38.735	-27.06	WGS84	6	10	2015.10.30	2015	LIFECWR TEAM	2	Animalia	Chordata	Aves	Anseriformes	Anatidae	Anas	acuta		Anas acuta	Linnaeus, 1758	Anas acuta Linnaeus, 1758	species	Sofia Goulart, Mariana R. Brito and Sónia Santos	2015
5234	FieldObservation	https://creativecommons.org/licenses/by/4.0/legalcode	UAc	0a80feca-b411-428a-a34e-c5c2fa07cdba	Birds from Praia da Vitória marshes (Terceira, Azores, Portugal)	ObservedSpecimen	Palearctic	Portugal	Azores	Terceira	Praia da Vitória	Paul da Pedreira do Cabo da Praia	38°42'15,538"N, 27°2'47,222"W	38.7043	-27.0465	WGS84	3	10	2015.10.7	2015	LIFECWR TEAM	4	Animalia	Chordata	Aves	Anseriformes	Anatidae	Anas	acuta		Anas acuta	Linnaeus, 1758	Anas acuta Linnaeus, 1758	species	Sofia Goulart, Mariana R. Brito and Sónia Santos	2015
5262	FieldObservation	https://creativecommons.org/licenses/by/4.0/legalcode	UAc	0a80feca-b411-428a-a34e-c5c2fa07cdba	Birds from Praia da Vitória marshes (Terceira, Azores, Portugal)	ObservedSpecimen	Palearctic	Portugal	Azores	Terceira	Praia da Vitória	Paul da Pedreira do Cabo da Praia	38°42'15,538"N, 27°2'47,222"W	38.7043	-27.0465	WGS84	3	10	2015.10.8	2015	LIFECWR TEAM	5	Animalia	Chordata	Aves	Anseriformes	Anatidae	Anas	acuta		Anas acuta	Linnaeus, 1758	Anas acuta Linnaeus, 1758	species	Sofia Goulart, Mariana R. Brito and Sónia Santos	2015
5282	FieldObservation	https://creativecommons.org/licenses/by/4.0/legalcode	UAc	0a80feca-b411-428a-a34e-c5c2fa07cdba	Birds from Praia da Vitória marshes (Terceira, Azores, Portugal)	ObservedSpecimen	Palearctic	Portugal	Azores	Terceira	Praia da Vitória	Paul da Pedreira do Cabo da Praia	38°42'15,538"N, 27°2'47,222"W	38.7043	-27.0465	WGS84	3	10	2015.10.9	2015	LIFECWR TEAM	3	Animalia	Chordata	Aves	Anseriformes	Anatidae	Anas	acuta		Anas acuta	Linnaeus, 1758	Anas acuta Linnaeus, 1758	species	Sofia Goulart, Mariana R. Brito and Sónia Santos	2015
5319	FieldObservation	https://creativecommons.org/licenses/by/4.0/legalcode	UAc	0a80feca-b411-428a-a34e-c5c2fa07cdba	Birds from Praia da Vitória marshes (Terceira, Azores, Portugal)	ObservedSpecimen	Palearctic	Portugal	Azores	Terceira	Praia da Vitória	Paul da Praia da Vitória	38°44'5.915"N, 27°3'36.131"W	38.735	-27.06	WGS84	6	10	2015.11.11	2015	LIFECWR TEAM	1	Animalia	Chordata	Aves	Anseriformes	Anatidae	Anas	acuta		Anas acuta	Linnaeus, 1758	Anas acuta Linnaeus, 1758	species	Sofia Goulart, Mariana R. Brito and Sónia Santos	2015
5329	FieldObservation	https://creativecommons.org/licenses/by/4.0/legalcode	UAc	0a80feca-b411-428a-a34e-c5c2fa07cdba	Birds from Praia da Vitória marshes (Terceira, Azores, Portugal)	ObservedSpecimen	Palearctic	Portugal	Azores	Terceira	Praia da Vitória	Paul da Praia da Vitória	38°44'5.915"N, 27°3'36.131"W	38.735	-27.06	WGS84	6	10	2015.11.12	2015	LIFECWR TEAM	2	Animalia	Chordata	Aves	Anseriformes	Anatidae	Anas	acuta		Anas acuta	Linnaeus, 1758	Anas acuta Linnaeus, 1758	species	Sofia Goulart, Mariana R. Brito and Sónia Santos	2015
5349	FieldObservation	https://creativecommons.org/licenses/by/4.0/legalcode	UAc	0a80feca-b411-428a-a34e-c5c2fa07cdba	Birds from Praia da Vitória marshes (Terceira, Azores, Portugal)	ObservedSpecimen	Palearctic	Portugal	Azores	Terceira	Praia da Vitória	Paul da Praia da Vitória	38°44'5.915"N, 27°3'36.131"W	38.735	-27.06	WGS84	6	10	2015.11.13	2015	LIFECWR TEAM	2	Animalia	Chordata	Aves	Anseriformes	Anatidae	Anas	acuta		Anas acuta	Linnaeus, 1758	Anas acuta Linnaeus, 1758	species	Sofia Goulart, Mariana R. Brito and Sónia Santos	2015
5353	FieldObservation	https://creativecommons.org/licenses/by/4.0/legalcode	UAc	0a80feca-b411-428a-a34e-c5c2fa07cdba	Birds from Praia da Vitória marshes (Terceira, Azores, Portugal)	ObservedSpecimen	Palearctic	Portugal	Azores	Terceira	Praia da Vitória	Paul da Praia da Vitória	38°44'5.915"N, 27°3'36.131"W	38.735	-27.06	WGS84	6	10	2015.11.16	2015	LIFECWR TEAM	2	Animalia	Chordata	Aves	Anseriformes	Anatidae	Anas	acuta		Anas acuta	Linnaeus, 1758	Anas acuta Linnaeus, 1758	species	Sofia Goulart, Mariana R. Brito and Sónia Santos	2015
5371	FieldObservation	https://creativecommons.org/licenses/by/4.0/legalcode	UAc	0a80feca-b411-428a-a34e-c5c2fa07cdba	Birds from Praia da Vitória marshes (Terceira, Azores, Portugal)	ObservedSpecimen	Palearctic	Portugal	Azores	Terceira	Praia da Vitória	Paul da Praia da Vitória	38°44'5.915"N, 27°3'36.131"W	38.735	-27.06	WGS84	6	10	2015.11.17	2015	LIFECWR TEAM	2	Animalia	Chordata	Aves	Anseriformes	Anatidae	Anas	acuta		Anas acuta	Linnaeus, 1758	Anas acuta Linnaeus, 1758	species	Sofia Goulart, Mariana R. Brito and Sónia Santos	2015
5393	FieldObservation	https://creativecommons.org/licenses/by/4.0/legalcode	UAc	0a80feca-b411-428a-a34e-c5c2fa07cdba	Birds from Praia da Vitória marshes (Terceira, Azores, Portugal)	ObservedSpecimen	Palearctic	Portugal	Azores	Terceira	Praia da Vitória	Paul da Praia da Vitória	38°44'5.915"N, 27°3'36.131"W	38.735	-27.06	WGS84	6	10	2015.11.19	2015	LIFECWR TEAM	3	Animalia	Chordata	Aves	Anseriformes	Anatidae	Anas	acuta		Anas acuta	Linnaeus, 1758	Anas acuta Linnaeus, 1758	species	Sofia Goulart, Mariana R. Brito and Sónia Santos	2015
5448	FieldObservation	https://creativecommons.org/licenses/by/4.0/legalcode	UAc	0a80feca-b411-428a-a34e-c5c2fa07cdba	Birds from Praia da Vitória marshes (Terceira, Azores, Portugal)	ObservedSpecimen	Palearctic	Portugal	Azores	Terceira	Praia da Vitória	Paul da Praia da Vitória	38°44'5.915"N, 27°3'36.131"W	38.735	-27.06	WGS84	6	10	2015.11.23	2015	LIFECWR TEAM	2	Animalia	Chordata	Aves	Anseriformes	Anatidae	Anas	acuta		Anas acuta	Linnaeus, 1758	Anas acuta Linnaeus, 1758	species	Sofia Goulart, Mariana R. Brito and Sónia Santos	2015
5469	FieldObservation	https://creativecommons.org/licenses/by/4.0/legalcode	UAc	0a80feca-b411-428a-a34e-c5c2fa07cdba	Birds from Praia da Vitória marshes (Terceira, Azores, Portugal)	ObservedSpecimen	Palearctic	Portugal	Azores	Terceira	Praia da Vitória	Paul da Praia da Vitória	38°44'5.915"N, 27°3'36.131"W	38.735	-27.06	WGS84	6	10	2015.11.24	2015	LIFECWR TEAM	2	Animalia	Chordata	Aves	Anseriformes	Anatidae	Anas	acuta		Anas acuta	Linnaeus, 1758	Anas acuta Linnaeus, 1758	species	Sofia Goulart, Mariana R. Brito and Sónia Santos	2015
5519	FieldObservation	https://creativecommons.org/licenses/by/4.0/legalcode	UAc	0a80feca-b411-428a-a34e-c5c2fa07cdba	Birds from Praia da Vitória marshes (Terceira, Azores, Portugal)	ObservedSpecimen	Palearctic	Portugal	Azores	Terceira	Praia da Vitória	Paul da Praia da Vitória	38°44'5.915"N, 27°3'36.131"W	38.735	-27.06	WGS84	6	10	2015.11.26	2015	LIFECWR TEAM	2	Animalia	Chordata	Aves	Anseriformes	Anatidae	Anas	acuta		Anas acuta	Linnaeus, 1758	Anas acuta Linnaeus, 1758	species	Sofia Goulart, Mariana R. Brito and Sónia Santos	2015
5559	FieldObservation	https://creativecommons.org/licenses/by/4.0/legalcode	UAc	0a80feca-b411-428a-a34e-c5c2fa07cdba	Birds from Praia da Vitória marshes (Terceira, Azores, Portugal)	ObservedSpecimen	Palearctic	Portugal	Azores	Terceira	Praia da Vitória	Paul da Pedreira do Cabo da Praia	38°42'15,538"N, 27°2'47,222"W	38.7043	-27.0465	WGS84	3	10	2015.11.3	2015	LIFECWR TEAM	3	Animalia	Chordata	Aves	Anseriformes	Anatidae	Anas	acuta		Anas acuta	Linnaeus, 1758	Anas acuta Linnaeus, 1758	species	Sofia Goulart, Mariana R. Brito and Sónia Santos	2015
5611	FieldObservation	https://creativecommons.org/licenses/by/4.0/legalcode	UAc	0a80feca-b411-428a-a34e-c5c2fa07cdba	Birds from Praia da Vitória marshes (Terceira, Azores, Portugal)	ObservedSpecimen	Palearctic	Portugal	Azores	Terceira	Praia da Vitória	Paul da Pedreira do Cabo da Praia	38°42'15,538"N, 27°2'47,222"W	38.7043	-27.0465	WGS84	3	10	2015.11.5	2015	LIFECWR TEAM	4	Animalia	Chordata	Aves	Anseriformes	Anatidae	Anas	acuta		Anas acuta	Linnaeus, 1758	Anas acuta Linnaeus, 1758	species	Sofia Goulart, Mariana R. Brito and Sónia Santos	2015
5634	FieldObservation	https://creativecommons.org/licenses/by/4.0/legalcode	UAc	0a80feca-b411-428a-a34e-c5c2fa07cdba	Birds from Praia da Vitória marshes (Terceira, Azores, Portugal)	ObservedSpecimen	Palearctic	Portugal	Azores	Terceira	Praia da Vitória	Paul da Praia da Vitória	38°44'5.915"N, 27°3'36.131"W	38.735	-27.06	WGS84	6	10	2015.11.6	2015	LIFECWR TEAM	1	Animalia	Chordata	Aves	Anseriformes	Anatidae	Anas	acuta		Anas acuta	Linnaeus, 1758	Anas acuta Linnaeus, 1758	species	Sofia Goulart, Mariana R. Brito and Sónia Santos	2015
5659	FieldObservation	https://creativecommons.org/licenses/by/4.0/legalcode	UAc	0a80feca-b411-428a-a34e-c5c2fa07cdba	Birds from Praia da Vitória marshes (Terceira, Azores, Portugal)	ObservedSpecimen	Palearctic	Portugal	Azores	Terceira	Praia da Vitória	Paul da Praia da Vitória	38°44'5.915"N, 27°3'36.131"W	38.735	-27.06	WGS84	6	10	2015.11.9	2015	LIFECWR TEAM	2	Animalia	Chordata	Aves	Anseriformes	Anatidae	Anas	acuta		Anas acuta	Linnaeus, 1758	Anas acuta Linnaeus, 1758	species	Sofia Goulart, Mariana R. Brito and Sónia Santos	2015
5701	FieldObservation	https://creativecommons.org/licenses/by/4.0/legalcode	UAc	0a80feca-b411-428a-a34e-c5c2fa07cdba	Birds from Praia da Vitória marshes (Terceira, Azores, Portugal)	ObservedSpecimen	Palearctic	Portugal	Azores	Terceira	Praia da Vitória	Paul da Pedreira do Cabo da Praia	38°42'15,538"N, 27°2'47,222"W	38.7043	-27.0465	WGS84	3	10	2015.12.10	2015	LIFECWR TEAM	1	Animalia	Chordata	Aves	Anseriformes	Anatidae	Anas	acuta		Anas acuta	Linnaeus, 1758	Anas acuta Linnaeus, 1758	species	Sofia Goulart, Mariana R. Brito and Sónia Santos	2015
5702	FieldObservation	https://creativecommons.org/licenses/by/4.0/legalcode	UAc	0a80feca-b411-428a-a34e-c5c2fa07cdba	Birds from Praia da Vitória marshes (Terceira, Azores, Portugal)	ObservedSpecimen	Palearctic	Portugal	Azores	Terceira	Praia da Vitória	Paul da Praia da Vitória	38°44'5.915"N, 27°3'36.131"W	38.735	-27.06	WGS84	6	10	2015.12.10	2015	LIFECWR TEAM	3	Animalia	Chordata	Aves	Anseriformes	Anatidae	Anas	acuta		Anas acuta	Linnaeus, 1758	Anas acuta Linnaeus, 1758	species	Sofia Goulart, Mariana R. Brito and Sónia Santos	2015
5736	FieldObservation	https://creativecommons.org/licenses/by/4.0/legalcode	UAc	0a80feca-b411-428a-a34e-c5c2fa07cdba	Birds from Praia da Vitória marshes (Terceira, Azores, Portugal)	ObservedSpecimen	Palearctic	Portugal	Azores	Terceira	Praia da Vitória	Paul da Praia da Vitória	38°44'5.915"N, 27°3'36.131"W	38.735	-27.06	WGS84	6	10	2015.12.11	2015	LIFECWR TEAM	2	Animalia	Chordata	Aves	Anseriformes	Anatidae	Anas	acuta		Anas acuta	Linnaeus, 1758	Anas acuta Linnaeus, 1758	species	Sofia Goulart, Mariana R. Brito and Sónia Santos	2015
5748	FieldObservation	https://creativecommons.org/licenses/by/4.0/legalcode	UAc	0a80feca-b411-428a-a34e-c5c2fa07cdba	Birds from Praia da Vitória marshes (Terceira, Azores, Portugal)	ObservedSpecimen	Palearctic	Portugal	Azores	Terceira	Praia da Vitória	Paul da Praia da Vitória	38°44'5.915"N, 27°3'36.131"W	38.735	-27.06	WGS84	6	10	2015.12.14	2015	LIFECWR TEAM	6	Animalia	Chordata	Aves	Anseriformes	Anatidae	Anas	acuta		Anas acuta	Linnaeus, 1758	Anas acuta Linnaeus, 1758	species	Sofia Goulart, Mariana R. Brito and Sónia Santos	2015
5765	FieldObservation	https://creativecommons.org/licenses/by/4.0/legalcode	UAc	0a80feca-b411-428a-a34e-c5c2fa07cdba	Birds from Praia da Vitória marshes (Terceira, Azores, Portugal)	ObservedSpecimen	Palearctic	Portugal	Azores	Terceira	Praia da Vitória	Paul da Praia da Vitória	38°44'5.915"N, 27°3'36.131"W	38.735	-27.06	WGS84	6	10	2015.12.16	2015	LIFECWR TEAM	4	Animalia	Chordata	Aves	Anseriformes	Anatidae	Anas	acuta		Anas acuta	Linnaeus, 1758	Anas acuta Linnaeus, 1758	species	Sofia Goulart, Mariana R. Brito and Sónia Santos	2015
5792	FieldObservation	https://creativecommons.org/licenses/by/4.0/legalcode	UAc	0a80feca-b411-428a-a34e-c5c2fa07cdba	Birds from Praia da Vitória marshes (Terceira, Azores, Portugal)	ObservedSpecimen	Palearctic	Portugal	Azores	Terceira	Praia da Vitória	Paul da Praia da Vitória	38°44'5.915"N, 27°3'36.131"W	38.735	-27.06	WGS84	6	10	2015.12.17	2015	LIFECWR TEAM	7	Animalia	Chordata	Aves	Anseriformes	Anatidae	Anas	acuta		Anas acuta	Linnaeus, 1758	Anas acuta Linnaeus, 1758	species	Sofia Goulart, Mariana R. Brito and Sónia Santos	2015
5800	FieldObservation	https://creativecommons.org/licenses/by/4.0/legalcode	UAc	0a80feca-b411-428a-a34e-c5c2fa07cdba	Birds from Praia da Vitória marshes (Terceira, Azores, Portugal)	ObservedSpecimen	Palearctic	Portugal	Azores	Terceira	Praia da Vitória	Paul da Praia da Vitória	38°44'5.915"N, 27°3'36.131"W	38.735	-27.06	WGS84	6	10	2015.12.18	2015	LIFECWR TEAM	2	Animalia	Chordata	Aves	Anseriformes	Anatidae	Anas	acuta		Anas acuta	Linnaeus, 1758	Anas acuta Linnaeus, 1758	species	Sofia Goulart, Mariana R. Brito and Sónia Santos	2015
5807	FieldObservation	https://creativecommons.org/licenses/by/4.0/legalcode	UAc	0a80feca-b411-428a-a34e-c5c2fa07cdba	Birds from Praia da Vitória marshes (Terceira, Azores, Portugal)	ObservedSpecimen	Palearctic	Portugal	Azores	Terceira	Praia da Vitória	Paul da Pedreira do Cabo da Praia	38°42'15,538"N, 27°2'47,222"W	38.7043	-27.0465	WGS84	3	10	2015.12.2	2015	LIFECWR TEAM	1	Animalia	Chordata	Aves	Anseriformes	Anatidae	Anas	acuta		Anas acuta	Linnaeus, 1758	Anas acuta Linnaeus, 1758	species	Sofia Goulart, Mariana R. Brito and Sónia Santos	2015
5808	FieldObservation	https://creativecommons.org/licenses/by/4.0/legalcode	UAc	0a80feca-b411-428a-a34e-c5c2fa07cdba	Birds from Praia da Vitória marshes (Terceira, Azores, Portugal)	ObservedSpecimen	Palearctic	Portugal	Azores	Terceira	Praia da Vitória	Paul da Praia da Vitória	38°44'5.915"N, 27°3'36.131"W	38.735	-27.06	WGS84	6	10	2015.12.2	2015	LIFECWR TEAM	4	Animalia	Chordata	Aves	Anseriformes	Anatidae	Anas	acuta		Anas acuta	Linnaeus, 1758	Anas acuta Linnaeus, 1758	species	Sofia Goulart, Mariana R. Brito and Sónia Santos	2015
5836	FieldObservation	https://creativecommons.org/licenses/by/4.0/legalcode	UAc	0a80feca-b411-428a-a34e-c5c2fa07cdba	Birds from Praia da Vitória marshes (Terceira, Azores, Portugal)	ObservedSpecimen	Palearctic	Portugal	Azores	Terceira	Praia da Vitória	Paul da Praia da Vitória	38°44'5.915"N, 27°3'36.131"W	38.735	-27.06	WGS84	6	10	2015.12.21	2015	LIFECWR TEAM	3	Animalia	Chordata	Aves	Anseriformes	Anatidae	Anas	acuta		Anas acuta	Linnaeus, 1758	Anas acuta Linnaeus, 1758	species	Sofia Goulart, Mariana R. Brito and Sónia Santos	2015
5849	FieldObservation	https://creativecommons.org/licenses/by/4.0/legalcode	UAc	0a80feca-b411-428a-a34e-c5c2fa07cdba	Birds from Praia da Vitória marshes (Terceira, Azores, Portugal)	ObservedSpecimen	Palearctic	Portugal	Azores	Terceira	Praia da Vitória	Paul da Pedreira do Cabo da Praia	38°42'15,538"N, 27°2'47,222"W	38.7043	-27.0465	WGS84	3	10	2015.12.22	2015	LIFECWR TEAM	1	Animalia	Chordata	Aves	Anseriformes	Anatidae	Anas	acuta		Anas acuta	Linnaeus, 1758	Anas acuta Linnaeus, 1758	species	Sofia Goulart, Mariana R. Brito and Sónia Santos	2015
5877	FieldObservation	https://creativecommons.org/licenses/by/4.0/legalcode	UAc	0a80feca-b411-428a-a34e-c5c2fa07cdba	Birds from Praia da Vitória marshes (Terceira, Azores, Portugal)	ObservedSpecimen	Palearctic	Portugal	Azores	Terceira	Praia da Vitória	Paul da Praia da Vitória	38°44'5.915"N, 27°3'36.131"W	38.735	-27.06	WGS84	6	10	2015.12.28	2015	LIFECWR TEAM	3	Animalia	Chordata	Aves	Anseriformes	Anatidae	Anas	acuta		Anas acuta	Linnaeus, 1758	Anas acuta Linnaeus, 1758	species	Sofia Goulart, Mariana R. Brito and Sónia Santos	2015
5903	FieldObservation	https://creativecommons.org/licenses/by/4.0/legalcode	UAc	0a80feca-b411-428a-a34e-c5c2fa07cdba	Birds from Praia da Vitória marshes (Terceira, Azores, Portugal)	ObservedSpecimen	Palearctic	Portugal	Azores	Terceira	Praia da Vitória	Paul da Praia da Vitória	38°44'5.915"N, 27°3'36.131"W	38.735	-27.06	WGS84	6	10	2015.12.29	2015	LIFECWR TEAM	2	Animalia	Chordata	Aves	Anseriformes	Anatidae	Anas	acuta		Anas acuta	Linnaeus, 1758	Anas acuta Linnaeus, 1758	species	Sofia Goulart, Mariana R. Brito and Sónia Santos	2015
5924	FieldObservation	https://creativecommons.org/licenses/by/4.0/legalcode	UAc	0a80feca-b411-428a-a34e-c5c2fa07cdba	Birds from Praia da Vitória marshes (Terceira, Azores, Portugal)	ObservedSpecimen	Palearctic	Portugal	Azores	Terceira	Praia da Vitória	Paul da Praia da Vitória	38°44'5.915"N, 27°3'36.131"W	38.735	-27.06	WGS84	6	10	2015.12.3	2015	LIFECWR TEAM	4	Animalia	Chordata	Aves	Anseriformes	Anatidae	Anas	acuta		Anas acuta	Linnaeus, 1758	Anas acuta Linnaeus, 1758	species	Sofia Goulart, Mariana R. Brito and Sónia Santos	2015
5954	FieldObservation	https://creativecommons.org/licenses/by/4.0/legalcode	UAc	0a80feca-b411-428a-a34e-c5c2fa07cdba	Birds from Praia da Vitória marshes (Terceira, Azores, Portugal)	ObservedSpecimen	Palearctic	Portugal	Azores	Terceira	Praia da Vitória	Paul da Praia da Vitória	38°44'5.915"N, 27°3'36.131"W	38.735	-27.06	WGS84	6	10	2015.12.30	2015	LIFECWR TEAM	5	Animalia	Chordata	Aves	Anseriformes	Anatidae	Anas	acuta		Anas acuta	Linnaeus, 1758	Anas acuta Linnaeus, 1758	species	Sofia Goulart, Mariana R. Brito and Sónia Santos	2015
5981	FieldObservation	https://creativecommons.org/licenses/by/4.0/legalcode	UAc	0a80feca-b411-428a-a34e-c5c2fa07cdba	Birds from Praia da Vitória marshes (Terceira, Azores, Portugal)	ObservedSpecimen	Palearctic	Portugal	Azores	Terceira	Praia da Vitória	Paul da Praia da Vitória	38°44'5.915"N, 27°3'36.131"W	38.735	-27.06	WGS84	6	10	2015.12.4	2015	LIFECWR TEAM	3	Animalia	Chordata	Aves	Anseriformes	Anatidae	Anas	acuta		Anas acuta	Linnaeus, 1758	Anas acuta Linnaeus, 1758	species	Sofia Goulart, Mariana R. Brito and Sónia Santos	2015
6009	FieldObservation	https://creativecommons.org/licenses/by/4.0/legalcode	UAc	0a80feca-b411-428a-a34e-c5c2fa07cdba	Birds from Praia da Vitória marshes (Terceira, Azores, Portugal)	ObservedSpecimen	Palearctic	Portugal	Azores	Terceira	Praia da Vitória	Paul da Pedreira do Cabo da Praia	38°42'15,538"N, 27°2'47,222"W	38.7043	-27.0465	WGS84	3	10	2015.12.7	2015	LIFECWR TEAM	1	Animalia	Chordata	Aves	Anseriformes	Anatidae	Anas	acuta		Anas acuta	Linnaeus, 1758	Anas acuta Linnaeus, 1758	species	Sofia Goulart, Mariana R. Brito and Sónia Santos	2015
6010	FieldObservation	https://creativecommons.org/licenses/by/4.0/legalcode	UAc	0a80feca-b411-428a-a34e-c5c2fa07cdba	Birds from Praia da Vitória marshes (Terceira, Azores, Portugal)	ObservedSpecimen	Palearctic	Portugal	Azores	Terceira	Praia da Vitória	Paul da Praia da Vitória	38°44'5.915"N, 27°3'36.131"W	38.735	-27.06	WGS84	6	10	2015.12.7	2015	LIFECWR TEAM	3	Animalia	Chordata	Aves	Anseriformes	Anatidae	Anas	acuta		Anas acuta	Linnaeus, 1758	Anas acuta Linnaeus, 1758	species	Sofia Goulart, Mariana R. Brito and Sónia Santos	2015
6043	FieldObservation	https://creativecommons.org/licenses/by/4.0/legalcode	UAc	0a80feca-b411-428a-a34e-c5c2fa07cdba	Birds from Praia da Vitória marshes (Terceira, Azores, Portugal)	ObservedSpecimen	Palearctic	Portugal	Azores	Terceira	Praia da Vitória	Paul da Praia da Vitória	38°44'5.915"N, 27°3'36.131"W	38.735	-27.06	WGS84	6	10	2015.12.9	2015	LIFECWR TEAM	3	Animalia	Chordata	Aves	Anseriformes	Anatidae	Anas	acuta		Anas acuta	Linnaeus, 1758	Anas acuta Linnaeus, 1758	species	Sofia Goulart, Mariana R. Brito and Sónia Santos	2015
7609	FieldObservation	https://creativecommons.org/licenses/by/4.0/legalcode	UAc	0a80feca-b411-428a-a34e-c5c2fa07cdba	Birds from Praia da Vitória marshes (Terceira, Azores, Portugal)	ObservedSpecimen	Palearctic	Portugal	Azores	Terceira	Praia da Vitória	Paul da Praia da Vitória	38°44'5.915"N, 27°3'36.131"W	38.735	-27.06	WGS84	6	10	2016.1.11	2016	LIFECWR TEAM	4	Animalia	Chordata	Aves	Anseriformes	Anatidae	Anas	acuta		Anas acuta	Linnaeus, 1758	Anas acuta Linnaeus, 1758	species	Sofia Goulart, Mariana R. Brito and Sónia Santos	2016
7716	FieldObservation	https://creativecommons.org/licenses/by/4.0/legalcode	UAc	0a80feca-b411-428a-a34e-c5c2fa07cdba	Birds from Praia da Vitória marshes (Terceira, Azores, Portugal)	ObservedSpecimen	Palearctic	Portugal	Azores	Terceira	Praia da Vitória	Paul da Praia da Vitória	38°44'5.915"N, 27°3'36.131"W	38.735	-27.06	WGS84	6	10	2016.1.19	2016	LIFECWR TEAM	2	Animalia	Chordata	Aves	Anseriformes	Anatidae	Anas	acuta		Anas acuta	Linnaeus, 1758	Anas acuta Linnaeus, 1758	species	Sofia Goulart, Mariana R. Brito and Sónia Santos	2016
7726	FieldObservation	https://creativecommons.org/licenses/by/4.0/legalcode	UAc	0a80feca-b411-428a-a34e-c5c2fa07cdba	Birds from Praia da Vitória marshes (Terceira, Azores, Portugal)	ObservedSpecimen	Palearctic	Portugal	Azores	Terceira	Praia da Vitória	Paul da Praia da Vitória	38°44'5.915"N, 27°3'36.131"W	38.735	-27.06	WGS84	6	10	2016.1.20	2016	LIFECWR TEAM	5	Animalia	Chordata	Aves	Anseriformes	Anatidae	Anas	acuta		Anas acuta	Linnaeus, 1758	Anas acuta Linnaeus, 1758	species	Sofia Goulart, Mariana R. Brito and Sónia Santos	2016
7747	FieldObservation	https://creativecommons.org/licenses/by/4.0/legalcode	UAc	0a80feca-b411-428a-a34e-c5c2fa07cdba	Birds from Praia da Vitória marshes (Terceira, Azores, Portugal)	ObservedSpecimen	Palearctic	Portugal	Azores	Terceira	Praia da Vitória	Paul da Praia da Vitória	38°44'5.915"N, 27°3'36.131"W	38.735	-27.06	WGS84	6	10	2016.1.21	2016	LIFECWR TEAM	4	Animalia	Chordata	Aves	Anseriformes	Anatidae	Anas	acuta		Anas acuta	Linnaeus, 1758	Anas acuta Linnaeus, 1758	species	Sofia Goulart, Mariana R. Brito and Sónia Santos	2016
7756	FieldObservation	https://creativecommons.org/licenses/by/4.0/legalcode	UAc	0a80feca-b411-428a-a34e-c5c2fa07cdba	Birds from Praia da Vitória marshes (Terceira, Azores, Portugal)	ObservedSpecimen	Palearctic	Portugal	Azores	Terceira	Praia da Vitória	Paul da Praia da Vitória	38°44'5.915"N, 27°3'36.131"W	38.735	-27.06	WGS84	6	10	2016.1.22	2016	LIFECWR TEAM	6	Animalia	Chordata	Aves	Anseriformes	Anatidae	Anas	acuta		Anas acuta	Linnaeus, 1758	Anas acuta Linnaeus, 1758	species	Sofia Goulart, Mariana R. Brito and Sónia Santos	2016
7784	FieldObservation	https://creativecommons.org/licenses/by/4.0/legalcode	UAc	0a80feca-b411-428a-a34e-c5c2fa07cdba	Birds from Praia da Vitória marshes (Terceira, Azores, Portugal)	ObservedSpecimen	Palearctic	Portugal	Azores	Terceira	Praia da Vitória	Paul da Praia da Vitória	38°44'5.915"N, 27°3'36.131"W	38.735	-27.06	WGS84	6	10	2016.1.25	2016	LIFECWR TEAM	5	Animalia	Chordata	Aves	Anseriformes	Anatidae	Anas	acuta		Anas acuta	Linnaeus, 1758	Anas acuta Linnaeus, 1758	species	Sofia Goulart, Mariana R. Brito and Sónia Santos	2016
7798	FieldObservation	https://creativecommons.org/licenses/by/4.0/legalcode	UAc	0a80feca-b411-428a-a34e-c5c2fa07cdba	Birds from Praia da Vitória marshes (Terceira, Azores, Portugal)	ObservedSpecimen	Palearctic	Portugal	Azores	Terceira	Praia da Vitória	Paul da Praia da Vitória	38°44'5.915"N, 27°3'36.131"W	38.735	-27.06	WGS84	6	10	2016.1.26	2016	LIFECWR TEAM	5	Animalia	Chordata	Aves	Anseriformes	Anatidae	Anas	acuta		Anas acuta	Linnaeus, 1758	Anas acuta Linnaeus, 1758	species	Sofia Goulart, Mariana R. Brito and Sónia Santos	2016
7826	FieldObservation	https://creativecommons.org/licenses/by/4.0/legalcode	UAc	0a80feca-b411-428a-a34e-c5c2fa07cdba	Birds from Praia da Vitória marshes (Terceira, Azores, Portugal)	ObservedSpecimen	Palearctic	Portugal	Azores	Terceira	Praia da Vitória	Paul da Praia da Vitória	38°44'5.915"N, 27°3'36.131"W	38.735	-27.06	WGS84	6	10	2016.1.27	2016	LIFECWR TEAM	5	Animalia	Chordata	Aves	Anseriformes	Anatidae	Anas	acuta		Anas acuta	Linnaeus, 1758	Anas acuta Linnaeus, 1758	species	Sofia Goulart, Mariana R. Brito and Sónia Santos	2016
7853	FieldObservation	https://creativecommons.org/licenses/by/4.0/legalcode	UAc	0a80feca-b411-428a-a34e-c5c2fa07cdba	Birds from Praia da Vitória marshes (Terceira, Azores, Portugal)	ObservedSpecimen	Palearctic	Portugal	Azores	Terceira	Praia da Vitória	Paul da Praia da Vitória	38°44'5.915"N, 27°3'36.131"W	38.735	-27.06	WGS84	6	10	2016.1.28	2016	LIFECWR TEAM	5	Animalia	Chordata	Aves	Anseriformes	Anatidae	Anas	acuta		Anas acuta	Linnaeus, 1758	Anas acuta Linnaeus, 1758	species	Sofia Goulart, Mariana R. Brito and Sónia Santos	2016
7881	FieldObservation	https://creativecommons.org/licenses/by/4.0/legalcode	UAc	0a80feca-b411-428a-a34e-c5c2fa07cdba	Birds from Praia da Vitória marshes (Terceira, Azores, Portugal)	ObservedSpecimen	Palearctic	Portugal	Azores	Terceira	Praia da Vitória	Paul da Praia da Vitória	38°44'5.915"N, 27°3'36.131"W	38.735	-27.06	WGS84	6	10	2016.1.29	2016	LIFECWR TEAM	5	Animalia	Chordata	Aves	Anseriformes	Anatidae	Anas	acuta		Anas acuta	Linnaeus, 1758	Anas acuta Linnaeus, 1758	species	Sofia Goulart, Mariana R. Brito and Sónia Santos	2016
7910	FieldObservation	https://creativecommons.org/licenses/by/4.0/legalcode	UAc	0a80feca-b411-428a-a34e-c5c2fa07cdba	Birds from Praia da Vitória marshes (Terceira, Azores, Portugal)	ObservedSpecimen	Palearctic	Portugal	Azores	Terceira	Praia da Vitória	Paul da Praia da Vitória	38°44'5.915"N, 27°3'36.131"W	38.735	-27.06	WGS84	6	10	2016.1.4	2016	LIFECWR TEAM	3	Animalia	Chordata	Aves	Anseriformes	Anatidae	Anas	acuta		Anas acuta	Linnaeus, 1758	Anas acuta Linnaeus, 1758	species	Sofia Goulart, Mariana R. Brito and Sónia Santos	2016
7932	FieldObservation	https://creativecommons.org/licenses/by/4.0/legalcode	UAc	0a80feca-b411-428a-a34e-c5c2fa07cdba	Birds from Praia da Vitória marshes (Terceira, Azores, Portugal)	ObservedSpecimen	Palearctic	Portugal	Azores	Terceira	Praia da Vitória	Paul da Praia da Vitória	38°44'5.915"N, 27°3'36.131"W	38.735	-27.06	WGS84	6	10	2016.1.5	2016	LIFECWR TEAM	6	Animalia	Chordata	Aves	Anseriformes	Anatidae	Anas	acuta		Anas acuta	Linnaeus, 1758	Anas acuta Linnaeus, 1758	species	Sofia Goulart, Mariana R. Brito and Sónia Santos	2016
7959	FieldObservation	https://creativecommons.org/licenses/by/4.0/legalcode	UAc	0a80feca-b411-428a-a34e-c5c2fa07cdba	Birds from Praia da Vitória marshes (Terceira, Azores, Portugal)	ObservedSpecimen	Palearctic	Portugal	Azores	Terceira	Praia da Vitória	Paul da Praia da Vitória	38°44'5.915"N, 27°3'36.131"W	38.735	-27.06	WGS84	6	10	2016.1.6	2016	LIFECWR TEAM	3	Animalia	Chordata	Aves	Anseriformes	Anatidae	Anas	acuta		Anas acuta	Linnaeus, 1758	Anas acuta Linnaeus, 1758	species	Sofia Goulart, Mariana R. Brito and Sónia Santos	2016
7986	FieldObservation	https://creativecommons.org/licenses/by/4.0/legalcode	UAc	0a80feca-b411-428a-a34e-c5c2fa07cdba	Birds from Praia da Vitória marshes (Terceira, Azores, Portugal)	ObservedSpecimen	Palearctic	Portugal	Azores	Terceira	Praia da Vitória	Paul da Praia da Vitória	38°44'5.915"N, 27°3'36.131"W	38.735	-27.06	WGS84	6	10	2016.1.7	2016	LIFECWR TEAM	3	Animalia	Chordata	Aves	Anseriformes	Anatidae	Anas	acuta		Anas acuta	Linnaeus, 1758	Anas acuta Linnaeus, 1758	species	Sofia Goulart, Mariana R. Brito and Sónia Santos	2016
8017	FieldObservation	https://creativecommons.org/licenses/by/4.0/legalcode	UAc	0a80feca-b411-428a-a34e-c5c2fa07cdba	Birds from Praia da Vitória marshes (Terceira, Azores, Portugal)	ObservedSpecimen	Palearctic	Portugal	Azores	Terceira	Praia da Vitória	Paul da Praia da Vitória	38°44'5.915"N, 27°3'36.131"W	38.735	-27.06	WGS84	6	10	2016.1.8	2016	LIFECWR TEAM	5	Animalia	Chordata	Aves	Anseriformes	Anatidae	Anas	acuta		Anas acuta	Linnaeus, 1758	Anas acuta Linnaeus, 1758	species	Sofia Goulart, Mariana R. Brito and Sónia Santos	2016
8066	FieldObservation	https://creativecommons.org/licenses/by/4.0/legalcode	UAc	0a80feca-b411-428a-a34e-c5c2fa07cdba	Birds from Praia da Vitória marshes (Terceira, Azores, Portugal)	ObservedSpecimen	Palearctic	Portugal	Azores	Terceira	Praia da Vitória	Paul da Praia da Vitória	38°44'5.915"N, 27°3'36.131"W	38.735	-27.06	WGS84	6	10	2016.10.12	2016	LIFECWR TEAM	1	Animalia	Chordata	Aves	Anseriformes	Anatidae	Anas	acuta		Anas acuta	Linnaeus, 1758	Anas acuta Linnaeus, 1758	species	Sofia Goulart, Mariana R. Brito and Sónia Santos	2016
8074	FieldObservation	https://creativecommons.org/licenses/by/4.0/legalcode	UAc	0a80feca-b411-428a-a34e-c5c2fa07cdba	Birds from Praia da Vitória marshes (Terceira, Azores, Portugal)	ObservedSpecimen	Palearctic	Portugal	Azores	Terceira	Praia da Vitória	Paul da Praia da Vitória	38°44'5.915"N, 27°3'36.131"W	38.735	-27.06	WGS84	6	10	2016.10.13	2016	LIFECWR TEAM	1	Animalia	Chordata	Aves	Anseriformes	Anatidae	Anas	acuta		Anas acuta	Linnaeus, 1758	Anas acuta Linnaeus, 1758	species	Sofia Goulart, Mariana R. Brito and Sónia Santos	2016
8120	FieldObservation	https://creativecommons.org/licenses/by/4.0/legalcode	UAc	0a80feca-b411-428a-a34e-c5c2fa07cdba	Birds from Praia da Vitória marshes (Terceira, Azores, Portugal)	ObservedSpecimen	Palearctic	Portugal	Azores	Terceira	Praia da Vitória	Paul da Praia da Vitória	38°44'5.915"N, 27°3'36.131"W	38.735	-27.06	WGS84	6	10	2016.11.17	2016	LIFECWR TEAM	1	Animalia	Chordata	Aves	Anseriformes	Anatidae	Anas	acuta		Anas acuta	Linnaeus, 1758	Anas acuta Linnaeus, 1758	species	Sofia Goulart, Mariana R. Brito and Sónia Santos	2016
8131	FieldObservation	https://creativecommons.org/licenses/by/4.0/legalcode	UAc	0a80feca-b411-428a-a34e-c5c2fa07cdba	Birds from Praia da Vitória marshes (Terceira, Azores, Portugal)	ObservedSpecimen	Palearctic	Portugal	Azores	Terceira	Praia da Vitória	Paul da Praia da Vitória	38°44'5.915"N, 27°3'36.131"W	38.735	-27.06	WGS84	6	10	2016.11.21	2016	LIFECWR TEAM	1	Animalia	Chordata	Aves	Anseriformes	Anatidae	Anas	acuta		Anas acuta	Linnaeus, 1758	Anas acuta Linnaeus, 1758	species	Sofia Goulart, Mariana R. Brito and Sónia Santos	2016
8224	FieldObservation	https://creativecommons.org/licenses/by/4.0/legalcode	UAc	0a80feca-b411-428a-a34e-c5c2fa07cdba	Birds from Praia da Vitória marshes (Terceira, Azores, Portugal)	ObservedSpecimen	Palearctic	Portugal	Azores	Terceira	Praia da Vitória	Paul da Pedreira do Cabo da Praia	38°42'15,538"N, 27°2'47,222"W	38.7043	-27.0465	WGS84	3	10	2016.12.21	2016	LIFECWR TEAM	1	Animalia	Chordata	Aves	Anseriformes	Anatidae	Anas	acuta		Anas acuta	Linnaeus, 1758	Anas acuta Linnaeus, 1758	species	Sofia Goulart, Mariana R. Brito and Sónia Santos	2016
8240	FieldObservation	https://creativecommons.org/licenses/by/4.0/legalcode	UAc	0a80feca-b411-428a-a34e-c5c2fa07cdba	Birds from Praia da Vitória marshes (Terceira, Azores, Portugal)	ObservedSpecimen	Palearctic	Portugal	Azores	Terceira	Praia da Vitória	Paul da Praia da Vitória	38°44'5.915"N, 27°3'36.131"W	38.735	-27.06	WGS84	6	10	2016.2.1	2016	LIFECWR TEAM	5	Animalia	Chordata	Aves	Anseriformes	Anatidae	Anas	acuta		Anas acuta	Linnaeus, 1758	Anas acuta Linnaeus, 1758	species	Sofia Goulart, Mariana R. Brito and Sónia Santos	2016
8291	FieldObservation	https://creativecommons.org/licenses/by/4.0/legalcode	UAc	0a80feca-b411-428a-a34e-c5c2fa07cdba	Birds from Praia da Vitória marshes (Terceira, Azores, Portugal)	ObservedSpecimen	Palearctic	Portugal	Azores	Terceira	Praia da Vitória	Paul da Praia da Vitória	38°44'5.915"N, 27°3'36.131"W	38.735	-27.06	WGS84	6	10	2016.2.11	2016	LIFECWR TEAM	5	Animalia	Chordata	Aves	Anseriformes	Anatidae	Anas	acuta		Anas acuta	Linnaeus, 1758	Anas acuta Linnaeus, 1758	species	Sofia Goulart, Mariana R. Brito and Sónia Santos	2016
8317	FieldObservation	https://creativecommons.org/licenses/by/4.0/legalcode	UAc	0a80feca-b411-428a-a34e-c5c2fa07cdba	Birds from Praia da Vitória marshes (Terceira, Azores, Portugal)	ObservedSpecimen	Palearctic	Portugal	Azores	Terceira	Praia da Vitória	Paul da Praia da Vitória	38°44'5.915"N, 27°3'36.131"W	38.735	-27.06	WGS84	6	10	2016.2.12	2016	LIFECWR TEAM	5	Animalia	Chordata	Aves	Anseriformes	Anatidae	Anas	acuta		Anas acuta	Linnaeus, 1758	Anas acuta Linnaeus, 1758	species	Sofia Goulart, Mariana R. Brito and Sónia Santos	2016
8368	FieldObservation	https://creativecommons.org/licenses/by/4.0/legalcode	UAc	0a80feca-b411-428a-a34e-c5c2fa07cdba	Birds from Praia da Vitória marshes (Terceira, Azores, Portugal)	ObservedSpecimen	Palearctic	Portugal	Azores	Terceira	Praia da Vitória	Paul da Praia da Vitória	38°44'5.915"N, 27°3'36.131"W	38.735	-27.06	WGS84	6	10	2016.2.17	2016	LIFECWR TEAM	3	Animalia	Chordata	Aves	Anseriformes	Anatidae	Anas	acuta		Anas acuta	Linnaeus, 1758	Anas acuta Linnaeus, 1758	species	Sofia Goulart, Mariana R. Brito and Sónia Santos	2016
8378	FieldObservation	https://creativecommons.org/licenses/by/4.0/legalcode	UAc	0a80feca-b411-428a-a34e-c5c2fa07cdba	Birds from Praia da Vitória marshes (Terceira, Azores, Portugal)	ObservedSpecimen	Palearctic	Portugal	Azores	Terceira	Praia da Vitória	Paul da Praia da Vitória	38°44'5.915"N, 27°3'36.131"W	38.735	-27.06	WGS84	6	10	2016.2.18	2016	LIFECWR TEAM	3	Animalia	Chordata	Aves	Anseriformes	Anatidae	Anas	acuta		Anas acuta	Linnaeus, 1758	Anas acuta Linnaeus, 1758	species	Sofia Goulart, Mariana R. Brito and Sónia Santos	2016
8423	FieldObservation	https://creativecommons.org/licenses/by/4.0/legalcode	UAc	0a80feca-b411-428a-a34e-c5c2fa07cdba	Birds from Praia da Vitória marshes (Terceira, Azores, Portugal)	ObservedSpecimen	Palearctic	Portugal	Azores	Terceira	Praia da Vitória	Paul da Praia da Vitória	38°44'5.915"N, 27°3'36.131"W	38.735	-27.06	WGS84	6	10	2016.2.2	2016	LIFECWR TEAM	2	Animalia	Chordata	Aves	Anseriformes	Anatidae	Anas	acuta		Anas acuta	Linnaeus, 1758	Anas acuta Linnaeus, 1758	species	Sofia Goulart, Mariana R. Brito and Sónia Santos	2016
8478	FieldObservation	https://creativecommons.org/licenses/by/4.0/legalcode	UAc	0a80feca-b411-428a-a34e-c5c2fa07cdba	Birds from Praia da Vitória marshes (Terceira, Azores, Portugal)	ObservedSpecimen	Palearctic	Portugal	Azores	Terceira	Praia da Vitória	Paul da Praia da Vitória	38°44'5.915"N, 27°3'36.131"W	38.735	-27.06	WGS84	6	10	2016.2.23	2016	LIFECWR TEAM	4	Animalia	Chordata	Aves	Anseriformes	Anatidae	Anas	acuta		Anas acuta	Linnaeus, 1758	Anas acuta Linnaeus, 1758	species	Sofia Goulart, Mariana R. Brito and Sónia Santos	2016
8502	FieldObservation	https://creativecommons.org/licenses/by/4.0/legalcode	UAc	0a80feca-b411-428a-a34e-c5c2fa07cdba	Birds from Praia da Vitória marshes (Terceira, Azores, Portugal)	ObservedSpecimen	Palearctic	Portugal	Azores	Terceira	Praia da Vitória	Paul da Praia da Vitória	38°44'5.915"N, 27°3'36.131"W	38.735	-27.06	WGS84	6	10	2016.2.24	2016	LIFECWR TEAM	5	Animalia	Chordata	Aves	Anseriformes	Anatidae	Anas	acuta		Anas acuta	Linnaeus, 1758	Anas acuta Linnaeus, 1758	species	Sofia Goulart, Mariana R. Brito and Sónia Santos	2016
8541	FieldObservation	https://creativecommons.org/licenses/by/4.0/legalcode	UAc	0a80feca-b411-428a-a34e-c5c2fa07cdba	Birds from Praia da Vitória marshes (Terceira, Azores, Portugal)	ObservedSpecimen	Palearctic	Portugal	Azores	Terceira	Praia da Vitória	Paul da Praia da Vitória	38°44'5.915"N, 27°3'36.131"W	38.735	-27.06	WGS84	6	10	2016.2.29	2016	LIFECWR TEAM	4	Animalia	Chordata	Aves	Anseriformes	Anatidae	Anas	acuta		Anas acuta	Linnaeus, 1758	Anas acuta Linnaeus, 1758	species	Sofia Goulart, Mariana R. Brito and Sónia Santos	2016
8580	FieldObservation	https://creativecommons.org/licenses/by/4.0/legalcode	UAc	0a80feca-b411-428a-a34e-c5c2fa07cdba	Birds from Praia da Vitória marshes (Terceira, Azores, Portugal)	ObservedSpecimen	Palearctic	Portugal	Azores	Terceira	Praia da Vitória	Paul da Praia da Vitória	38°44'5.915"N, 27°3'36.131"W	38.735	-27.06	WGS84	6	10	2016.2.4	2016	LIFECWR TEAM	4	Animalia	Chordata	Aves	Anseriformes	Anatidae	Anas	acuta		Anas acuta	Linnaeus, 1758	Anas acuta Linnaeus, 1758	species	Sofia Goulart, Mariana R. Brito and Sónia Santos	2016
8604	FieldObservation	https://creativecommons.org/licenses/by/4.0/legalcode	UAc	0a80feca-b411-428a-a34e-c5c2fa07cdba	Birds from Praia da Vitória marshes (Terceira, Azores, Portugal)	ObservedSpecimen	Palearctic	Portugal	Azores	Terceira	Praia da Vitória	Paul da Praia da Vitória	38°44'5.915"N, 27°3'36.131"W	38.735	-27.06	WGS84	6	10	2016.2.5	2016	LIFECWR TEAM	5	Animalia	Chordata	Aves	Anseriformes	Anatidae	Anas	acuta		Anas acuta	Linnaeus, 1758	Anas acuta Linnaeus, 1758	species	Sofia Goulart, Mariana R. Brito and Sónia Santos	2016
8631	FieldObservation	https://creativecommons.org/licenses/by/4.0/legalcode	UAc	0a80feca-b411-428a-a34e-c5c2fa07cdba	Birds from Praia da Vitória marshes (Terceira, Azores, Portugal)	ObservedSpecimen	Palearctic	Portugal	Azores	Terceira	Praia da Vitória	Paul da Praia da Vitória	38°44'5.915"N, 27°3'36.131"W	38.735	-27.06	WGS84	6	10	2016.2.8	2016	LIFECWR TEAM	5	Animalia	Chordata	Aves	Anseriformes	Anatidae	Anas	acuta		Anas acuta	Linnaeus, 1758	Anas acuta Linnaeus, 1758	species	Sofia Goulart, Mariana R. Brito and Sónia Santos	2016
8660	FieldObservation	https://creativecommons.org/licenses/by/4.0/legalcode	UAc	0a80feca-b411-428a-a34e-c5c2fa07cdba	Birds from Praia da Vitória marshes (Terceira, Azores, Portugal)	ObservedSpecimen	Palearctic	Portugal	Azores	Terceira	Praia da Vitória	Paul da Praia da Vitória	38°44'5.915"N, 27°3'36.131"W	38.735	-27.06	WGS84	6	10	2016.3.1	2016	LIFECWR TEAM	5	Animalia	Chordata	Aves	Anseriformes	Anatidae	Anas	acuta		Anas acuta	Linnaeus, 1758	Anas acuta Linnaeus, 1758	species	Sofia Goulart, Mariana R. Brito and Sónia Santos	2016
8710	FieldObservation	https://creativecommons.org/licenses/by/4.0/legalcode	UAc	0a80feca-b411-428a-a34e-c5c2fa07cdba	Birds from Praia da Vitória marshes (Terceira, Azores, Portugal)	ObservedSpecimen	Palearctic	Portugal	Azores	Terceira	Praia da Vitória	Paul da Praia da Vitória	38°44'5.915"N, 27°3'36.131"W	38.735	-27.06	WGS84	6	10	2016.3.11	2016	LIFECWR TEAM	4	Animalia	Chordata	Aves	Anseriformes	Anatidae	Anas	acuta		Anas acuta	Linnaeus, 1758	Anas acuta Linnaeus, 1758	species	Sofia Goulart, Mariana R. Brito and Sónia Santos	2016
8724	FieldObservation	https://creativecommons.org/licenses/by/4.0/legalcode	UAc	0a80feca-b411-428a-a34e-c5c2fa07cdba	Birds from Praia da Vitória marshes (Terceira, Azores, Portugal)	ObservedSpecimen	Palearctic	Portugal	Azores	Terceira	Praia da Vitória	Paul da Praia da Vitória	38°44'5.915"N, 27°3'36.131"W	38.735	-27.06	WGS84	6	10	2016.3.14	2016	LIFECWR TEAM	4	Animalia	Chordata	Aves	Anseriformes	Anatidae	Anas	acuta		Anas acuta	Linnaeus, 1758	Anas acuta Linnaeus, 1758	species	Sofia Goulart, Mariana R. Brito and Sónia Santos	2016
8765	FieldObservation	https://creativecommons.org/licenses/by/4.0/legalcode	UAc	0a80feca-b411-428a-a34e-c5c2fa07cdba	Birds from Praia da Vitória marshes (Terceira, Azores, Portugal)	ObservedSpecimen	Palearctic	Portugal	Azores	Terceira	Praia da Vitória	Paul da Praia da Vitória	38°44'5.915"N, 27°3'36.131"W	38.735	-27.06	WGS84	6	10	2016.3.16	2016	LIFECWR TEAM	4	Animalia	Chordata	Aves	Anseriformes	Anatidae	Anas	acuta		Anas acuta	Linnaeus, 1758	Anas acuta Linnaeus, 1758	species	Sofia Goulart, Mariana R. Brito and Sónia Santos	2016
8780	FieldObservation	https://creativecommons.org/licenses/by/4.0/legalcode	UAc	0a80feca-b411-428a-a34e-c5c2fa07cdba	Birds from Praia da Vitória marshes (Terceira, Azores, Portugal)	ObservedSpecimen	Palearctic	Portugal	Azores	Terceira	Praia da Vitória	Paul da Praia da Vitória	38°44'5.915"N, 27°3'36.131"W	38.735	-27.06	WGS84	6	10	2016.3.17	2016	LIFECWR TEAM	5	Animalia	Chordata	Aves	Anseriformes	Anatidae	Anas	acuta		Anas acuta	Linnaeus, 1758	Anas acuta Linnaeus, 1758	species	Sofia Goulart, Mariana R. Brito and Sónia Santos	2016
8805	FieldObservation	https://creativecommons.org/licenses/by/4.0/legalcode	UAc	0a80feca-b411-428a-a34e-c5c2fa07cdba	Birds from Praia da Vitória marshes (Terceira, Azores, Portugal)	ObservedSpecimen	Palearctic	Portugal	Azores	Terceira	Praia da Vitória	Paul da Praia da Vitória	38°44'5.915"N, 27°3'36.131"W	38.735	-27.06	WGS84	6	10	2016.3.18	2016	LIFECWR TEAM	4	Animalia	Chordata	Aves	Anseriformes	Anatidae	Anas	acuta		Anas acuta	Linnaeus, 1758	Anas acuta Linnaeus, 1758	species	Sofia Goulart, Mariana R. Brito and Sónia Santos	2016
8831	FieldObservation	https://creativecommons.org/licenses/by/4.0/legalcode	UAc	0a80feca-b411-428a-a34e-c5c2fa07cdba	Birds from Praia da Vitória marshes (Terceira, Azores, Portugal)	ObservedSpecimen	Palearctic	Portugal	Azores	Terceira	Praia da Vitória	Paul da Praia da Vitória	38°44'5.915"N, 27°3'36.131"W	38.735	-27.06	WGS84	6	10	2016.3.2	2016	LIFECWR TEAM	3	Animalia	Chordata	Aves	Anseriformes	Anatidae	Anas	acuta		Anas acuta	Linnaeus, 1758	Anas acuta Linnaeus, 1758	species	Sofia Goulart, Mariana R. Brito and Sónia Santos	2016
8880	FieldObservation	https://creativecommons.org/licenses/by/4.0/legalcode	UAc	0a80feca-b411-428a-a34e-c5c2fa07cdba	Birds from Praia da Vitória marshes (Terceira, Azores, Portugal)	ObservedSpecimen	Palearctic	Portugal	Azores	Terceira	Praia da Vitória	Paul da Praia da Vitória	38°44'5.915"N, 27°3'36.131"W	38.735	-27.06	WGS84	6	10	2016.3.23	2016	LIFECWR TEAM	3	Animalia	Chordata	Aves	Anseriformes	Anatidae	Anas	acuta		Anas acuta	Linnaeus, 1758	Anas acuta Linnaeus, 1758	species	Sofia Goulart, Mariana R. Brito and Sónia Santos	2016
8901	FieldObservation	https://creativecommons.org/licenses/by/4.0/legalcode	UAc	0a80feca-b411-428a-a34e-c5c2fa07cdba	Birds from Praia da Vitória marshes (Terceira, Azores, Portugal)	ObservedSpecimen	Palearctic	Portugal	Azores	Terceira	Praia da Vitória	Paul da Praia da Vitória	38°44'5.915"N, 27°3'36.131"W	38.735	-27.06	WGS84	6	10	2016.3.24	2016	LIFECWR TEAM	2	Animalia	Chordata	Aves	Anseriformes	Anatidae	Anas	acuta		Anas acuta	Linnaeus, 1758	Anas acuta Linnaeus, 1758	species	Sofia Goulart, Mariana R. Brito and Sónia Santos	2016
8920	FieldObservation	https://creativecommons.org/licenses/by/4.0/legalcode	UAc	0a80feca-b411-428a-a34e-c5c2fa07cdba	Birds from Praia da Vitória marshes (Terceira, Azores, Portugal)	ObservedSpecimen	Palearctic	Portugal	Azores	Terceira	Praia da Vitória	Paul da Praia da Vitória	38°44'5.915"N, 27°3'36.131"W	38.735	-27.06	WGS84	6	10	2016.3.29	2016	LIFECWR TEAM	3	Animalia	Chordata	Aves	Anseriformes	Anatidae	Anas	acuta		Anas acuta	Linnaeus, 1758	Anas acuta Linnaeus, 1758	species	Sofia Goulart, Mariana R. Brito and Sónia Santos	2016
8960	FieldObservation	https://creativecommons.org/licenses/by/4.0/legalcode	UAc	0a80feca-b411-428a-a34e-c5c2fa07cdba	Birds from Praia da Vitória marshes (Terceira, Azores, Portugal)	ObservedSpecimen	Palearctic	Portugal	Azores	Terceira	Praia da Vitória	Paul da Praia da Vitória	38°44'5.915"N, 27°3'36.131"W	38.735	-27.06	WGS84	6	10	2016.3.30	2016	LIFECWR TEAM	5	Animalia	Chordata	Aves	Anseriformes	Anatidae	Anas	acuta		Anas acuta	Linnaeus, 1758	Anas acuta Linnaeus, 1758	species	Sofia Goulart, Mariana R. Brito and Sónia Santos	2016
8983	FieldObservation	https://creativecommons.org/licenses/by/4.0/legalcode	UAc	0a80feca-b411-428a-a34e-c5c2fa07cdba	Birds from Praia da Vitória marshes (Terceira, Azores, Portugal)	ObservedSpecimen	Palearctic	Portugal	Azores	Terceira	Praia da Vitória	Paul da Praia da Vitória	38°44'5.915"N, 27°3'36.131"W	38.735	-27.06	WGS84	6	10	2016.3.31	2016	LIFECWR TEAM	5	Animalia	Chordata	Aves	Anseriformes	Anatidae	Anas	acuta		Anas acuta	Linnaeus, 1758	Anas acuta Linnaeus, 1758	species	Sofia Goulart, Mariana R. Brito and Sónia Santos	2016
9005	FieldObservation	https://creativecommons.org/licenses/by/4.0/legalcode	UAc	0a80feca-b411-428a-a34e-c5c2fa07cdba	Birds from Praia da Vitória marshes (Terceira, Azores, Portugal)	ObservedSpecimen	Palearctic	Portugal	Azores	Terceira	Praia da Vitória	Paul da Praia da Vitória	38°44'5.915"N, 27°3'36.131"W	38.735	-27.06	WGS84	6	10	2016.3.4	2016	LIFECWR TEAM	3	Animalia	Chordata	Aves	Anseriformes	Anatidae	Anas	acuta		Anas acuta	Linnaeus, 1758	Anas acuta Linnaeus, 1758	species	Sofia Goulart, Mariana R. Brito and Sónia Santos	2016
9032	FieldObservation	https://creativecommons.org/licenses/by/4.0/legalcode	UAc	0a80feca-b411-428a-a34e-c5c2fa07cdba	Birds from Praia da Vitória marshes (Terceira, Azores, Portugal)	ObservedSpecimen	Palearctic	Portugal	Azores	Terceira	Praia da Vitória	Paul da Praia da Vitória	38°44'5.915"N, 27°3'36.131"W	38.735	-27.06	WGS84	6	10	2016.3.7	2016	LIFECWR TEAM	5	Animalia	Chordata	Aves	Anseriformes	Anatidae	Anas	acuta		Anas acuta	Linnaeus, 1758	Anas acuta Linnaeus, 1758	species	Sofia Goulart, Mariana R. Brito and Sónia Santos	2016
9058	FieldObservation	https://creativecommons.org/licenses/by/4.0/legalcode	UAc	0a80feca-b411-428a-a34e-c5c2fa07cdba	Birds from Praia da Vitória marshes (Terceira, Azores, Portugal)	ObservedSpecimen	Palearctic	Portugal	Azores	Terceira	Praia da Vitória	Paul da Praia da Vitória	38°44'5.915"N, 27°3'36.131"W	38.735	-27.06	WGS84	6	10	2016.3.8	2016	LIFECWR TEAM	4	Animalia	Chordata	Aves	Anseriformes	Anatidae	Anas	acuta		Anas acuta	Linnaeus, 1758	Anas acuta Linnaeus, 1758	species	Sofia Goulart, Mariana R. Brito and Sónia Santos	2016
9085	FieldObservation	https://creativecommons.org/licenses/by/4.0/legalcode	UAc	0a80feca-b411-428a-a34e-c5c2fa07cdba	Birds from Praia da Vitória marshes (Terceira, Azores, Portugal)	ObservedSpecimen	Palearctic	Portugal	Azores	Terceira	Praia da Vitória	Paul da Praia da Vitória	38°44'5.915"N, 27°3'36.131"W	38.735	-27.06	WGS84	6	10	2016.3.9	2016	LIFECWR TEAM	4	Animalia	Chordata	Aves	Anseriformes	Anatidae	Anas	acuta		Anas acuta	Linnaeus, 1758	Anas acuta Linnaeus, 1758	species	Sofia Goulart, Mariana R. Brito and Sónia Santos	2016
9109	FieldObservation	https://creativecommons.org/licenses/by/4.0/legalcode	UAc	0a80feca-b411-428a-a34e-c5c2fa07cdba	Birds from Praia da Vitória marshes (Terceira, Azores, Portugal)	ObservedSpecimen	Palearctic	Portugal	Azores	Terceira	Praia da Vitória	Paul da Praia da Vitória	38°44'5.915"N, 27°3'36.131"W	38.735	-27.06	WGS84	6	10	2016.4.1	2016	LIFECWR TEAM	5	Animalia	Chordata	Aves	Anseriformes	Anatidae	Anas	acuta		Anas acuta	Linnaeus, 1758	Anas acuta Linnaeus, 1758	species	Sofia Goulart, Mariana R. Brito and Sónia Santos	2016
9739	FieldObservation	https://creativecommons.org/licenses/by/4.0/legalcode	UAc	0a80feca-b411-428a-a34e-c5c2fa07cdba	Birds from Praia da Vitória marshes (Terceira, Azores, Portugal)	ObservedSpecimen	Palearctic	Portugal	Azores	Terceira	Praia da Vitória	Paul da Praia da Vitória	38°44'5.915"N, 27°3'36.131"W	38.735	-27.06	WGS84	6	10	2017.1.10	2017	LIFECWR TEAM	4	Animalia	Chordata	Aves	Anseriformes	Anatidae	Anas	acuta		Anas acuta	Linnaeus, 1758	Anas acuta Linnaeus, 1758	species	Sofia Goulart, Mariana R. Brito and Sónia Santos	2017
9751	FieldObservation	https://creativecommons.org/licenses/by/4.0/legalcode	UAc	0a80feca-b411-428a-a34e-c5c2fa07cdba	Birds from Praia da Vitória marshes (Terceira, Azores, Portugal)	ObservedSpecimen	Palearctic	Portugal	Azores	Terceira	Praia da Vitória	Paul da Pedreira do Cabo da Praia	38°42'15,538"N, 27°2'47,222"W	38.7043	-27.0465	WGS84	3	10	2017.1.12	2017	LIFECWR TEAM	1	Animalia	Chordata	Aves	Anseriformes	Anatidae	Anas	acuta		Anas acuta	Linnaeus, 1758	Anas acuta Linnaeus, 1758	species	Sofia Goulart, Mariana R. Brito and Sónia Santos	2017
9782	FieldObservation	https://creativecommons.org/licenses/by/4.0/legalcode	UAc	0a80feca-b411-428a-a34e-c5c2fa07cdba	Birds from Praia da Vitória marshes (Terceira, Azores, Portugal)	ObservedSpecimen	Palearctic	Portugal	Azores	Terceira	Praia da Vitória	Paul da Pedreira do Cabo da Praia	38°42'15,538"N, 27°2'47,222"W	38.7043	-27.0465	WGS84	3	10	2017.1.17	2017	LIFECWR TEAM	1	Animalia	Chordata	Aves	Anseriformes	Anatidae	Anas	acuta		Anas acuta	Linnaeus, 1758	Anas acuta Linnaeus, 1758	species	Sofia Goulart, Mariana R. Brito and Sónia Santos	2017
9783	FieldObservation	https://creativecommons.org/licenses/by/4.0/legalcode	UAc	0a80feca-b411-428a-a34e-c5c2fa07cdba	Birds from Praia da Vitória marshes (Terceira, Azores, Portugal)	ObservedSpecimen	Palearctic	Portugal	Azores	Terceira	Praia da Vitória	Paul da Praia da Vitória	38°44'5.915"N, 27°3'36.131"W	38.735	-27.06	WGS84	6	10	2017.1.17	2017	LIFECWR TEAM	3	Animalia	Chordata	Aves	Anseriformes	Anatidae	Anas	acuta		Anas acuta	Linnaeus, 1758	Anas acuta Linnaeus, 1758	species	Sofia Goulart, Mariana R. Brito and Sónia Santos	2017
9805	FieldObservation	https://creativecommons.org/licenses/by/4.0/legalcode	UAc	0a80feca-b411-428a-a34e-c5c2fa07cdba	Birds from Praia da Vitória marshes (Terceira, Azores, Portugal)	ObservedSpecimen	Palearctic	Portugal	Azores	Terceira	Praia da Vitória	Paul da Praia da Vitória	38°44'5.915"N, 27°3'36.131"W	38.735	-27.06	WGS84	6	10	2017.1.19	2017	LIFECWR TEAM	1	Animalia	Chordata	Aves	Anseriformes	Anatidae	Anas	acuta		Anas acuta	Linnaeus, 1758	Anas acuta Linnaeus, 1758	species	Sofia Goulart, Mariana R. Brito and Sónia Santos	2017
9818	FieldObservation	https://creativecommons.org/licenses/by/4.0/legalcode	UAc	0a80feca-b411-428a-a34e-c5c2fa07cdba	Birds from Praia da Vitória marshes (Terceira, Azores, Portugal)	ObservedSpecimen	Palearctic	Portugal	Azores	Terceira	Praia da Vitória	Paul da Praia da Vitória	38°44'5.915"N, 27°3'36.131"W	38.735	-27.06	WGS84	6	10	2017.1.26	2017	LIFECWR TEAM	3	Animalia	Chordata	Aves	Anseriformes	Anatidae	Anas	acuta		Anas acuta	Linnaeus, 1758	Anas acuta Linnaeus, 1758	species	Sofia Goulart, Mariana R. Brito and Sónia Santos	2017
9831	FieldObservation	https://creativecommons.org/licenses/by/4.0/legalcode	UAc	0a80feca-b411-428a-a34e-c5c2fa07cdba	Birds from Praia da Vitória marshes (Terceira, Azores, Portugal)	ObservedSpecimen	Palearctic	Portugal	Azores	Terceira	Praia da Vitória	Paul da Pedreira do Cabo da Praia	38°42'15,538"N, 27°2'47,222"W	38.7043	-27.0465	WGS84	3	10	2017.1.5	2017	LIFECWR TEAM	1	Animalia	Chordata	Aves	Anseriformes	Anatidae	Anas	acuta		Anas acuta	Linnaeus, 1758	Anas acuta Linnaeus, 1758	species	Sofia Goulart, Mariana R. Brito and Sónia Santos	2017
9851	FieldObservation	https://creativecommons.org/licenses/by/4.0/legalcode	UAc	0a80feca-b411-428a-a34e-c5c2fa07cdba	Birds from Praia da Vitória marshes (Terceira, Azores, Portugal)	ObservedSpecimen	Palearctic	Portugal	Azores	Terceira	Praia da Vitória	Paul da Pedreira do Cabo da Praia	38°42'15,538"N, 27°2'47,222"W	38.7043	-27.0465	WGS84	3	10	2017.1.6	2017	LIFECWR TEAM	1	Animalia	Chordata	Aves	Anseriformes	Anatidae	Anas	acuta		Anas acuta	Linnaeus, 1758	Anas acuta Linnaeus, 1758	species	Sofia Goulart, Mariana R. Brito and Sónia Santos	2017
9873	FieldObservation	https://creativecommons.org/licenses/by/4.0/legalcode	UAc	0a80feca-b411-428a-a34e-c5c2fa07cdba	Birds from Praia da Vitória marshes (Terceira, Azores, Portugal)	ObservedSpecimen	Palearctic	Portugal	Azores	Terceira	Praia da Vitória	Paul da Praia da Vitória	38°44'5.915"N, 27°3'36.131"W	38.735	-27.06	WGS84	6	10	2017.1.9	2017	LIFECWR TEAM	3	Animalia	Chordata	Aves	Anseriformes	Anatidae	Anas	acuta		Anas acuta	Linnaeus, 1758	Anas acuta Linnaeus, 1758	species	Sofia Goulart, Mariana R. Brito and Sónia Santos	2017
10640	FieldObservation	https://creativecommons.org/licenses/by/4.0/legalcode	UAc	0a80feca-b411-428a-a34e-c5c2fa07cdba	Birds from Praia da Vitória marshes (Terceira, Azores, Portugal)	ObservedSpecimen	Palearctic	Portugal	Azores	Terceira	Praia da Vitória	Paul da Praia da Vitória	38°44'5.915"N, 27°3'36.131"W	38.735	-27.06	WGS84	6	10	2017.2.17	2017	LIFECWR TEAM	1	Animalia	Chordata	Aves	Anseriformes	Anatidae	Anas	acuta		Anas acuta	Linnaeus, 1758	Anas acuta Linnaeus, 1758	species	Sofia Goulart, Mariana R. Brito and Sónia Santos	2017
10660	FieldObservation	https://creativecommons.org/licenses/by/4.0/legalcode	UAc	0a80feca-b411-428a-a34e-c5c2fa07cdba	Birds from Praia da Vitória marshes (Terceira, Azores, Portugal)	ObservedSpecimen	Palearctic	Portugal	Azores	Terceira	Praia da Vitória	Paul da Pedreira do Cabo da Praia	38°42'15,538"N, 27°2'47,222"W	38.7043	-27.0465	WGS84	3	10	2017.2.23	2017	LIFECWR TEAM	1	Animalia	Chordata	Aves	Anseriformes	Anatidae	Anas	acuta		Anas acuta	Linnaeus, 1758	Anas acuta Linnaeus, 1758	species	Sofia Goulart, Mariana R. Brito and Sónia Santos	2017
10677	FieldObservation	https://creativecommons.org/licenses/by/4.0/legalcode	UAc	0a80feca-b411-428a-a34e-c5c2fa07cdba	Birds from Praia da Vitória marshes (Terceira, Azores, Portugal)	ObservedSpecimen	Palearctic	Portugal	Azores	Terceira	Praia da Vitória	Paul da Pedreira do Cabo da Praia	38°42'15,538"N, 27°2'47,222"W	38.7043	-27.0465	WGS84	3	10	2017.2.24	2017	LIFECWR TEAM	1	Animalia	Chordata	Aves	Anseriformes	Anatidae	Anas	acuta		Anas acuta	Linnaeus, 1758	Anas acuta Linnaeus, 1758	species	Sofia Goulart, Mariana R. Brito and Sónia Santos	2017
10703	FieldObservation	https://creativecommons.org/licenses/by/4.0/legalcode	UAc	0a80feca-b411-428a-a34e-c5c2fa07cdba	Birds from Praia da Vitória marshes (Terceira, Azores, Portugal)	ObservedSpecimen	Palearctic	Portugal	Azores	Terceira	Praia da Vitória	Paul da Praia da Vitória	38°44'5.915"N, 27°3'36.131"W	38.735	-27.06	WGS84	6	10	2017.2.7	2017	LIFECWR TEAM	1	Animalia	Chordata	Aves	Anseriformes	Anatidae	Anas	acuta		Anas acuta	Linnaeus, 1758	Anas acuta Linnaeus, 1758	species	Sofia Goulart, Mariana R. Brito and Sónia Santos	2017
10722	FieldObservation	https://creativecommons.org/licenses/by/4.0/legalcode	UAc	0a80feca-b411-428a-a34e-c5c2fa07cdba	Birds from Praia da Vitória marshes (Terceira, Azores, Portugal)	ObservedSpecimen	Palearctic	Portugal	Azores	Terceira	Praia da Vitória	Paul da Pedreira do Cabo da Praia	38°42'15,538"N, 27°2'47,222"W	38.7043	-27.0465	WGS84	3	10	2017.3.1	2017	LIFECWR TEAM	1	Animalia	Chordata	Aves	Anseriformes	Anatidae	Anas	acuta		Anas acuta	Linnaeus, 1758	Anas acuta Linnaeus, 1758	species	Sofia Goulart, Mariana R. Brito and Sónia Santos	2017
10765	FieldObservation	https://creativecommons.org/licenses/by/4.0/legalcode	UAc	0a80feca-b411-428a-a34e-c5c2fa07cdba	Birds from Praia da Vitória marshes (Terceira, Azores, Portugal)	ObservedSpecimen	Palearctic	Portugal	Azores	Terceira	Praia da Vitória	Paul da Pedreira do Cabo da Praia	38°42'15,538"N, 27°2'47,222"W	38.7043	-27.0465	WGS84	3	10	2017.3.13	2017	LIFECWR TEAM	1	Animalia	Chordata	Aves	Anseriformes	Anatidae	Anas	acuta		Anas acuta	Linnaeus, 1758	Anas acuta Linnaeus, 1758	species	Sofia Goulart, Mariana R. Brito and Sónia Santos	2017
10986	FieldObservation	https://creativecommons.org/licenses/by/4.0/legalcode	UAc	0a80feca-b411-428a-a34e-c5c2fa07cdba	Birds from Praia da Vitória marshes (Terceira, Azores, Portugal)	ObservedSpecimen	Palearctic	Portugal	Azores	Terceira	Praia da Vitória	Paul da Pedreira do Cabo da Praia	38°42'15,538"N, 27°2'47,222"W	38.7043	-27.0465	WGS84	3	10	2017.4.3	2017	LIFECWR TEAM	17	Animalia	Chordata	Aves	Anseriformes	Anatidae	Anas	acuta		Anas acuta	Linnaeus, 1758	Anas acuta Linnaeus, 1758	species	Sofia Goulart, Mariana R. Brito and Sónia Santos	2017
11027	FieldObservation	https://creativecommons.org/licenses/by/4.0/legalcode	UAc	0a80feca-b411-428a-a34e-c5c2fa07cdba	Birds from Praia da Vitória marshes (Terceira, Azores, Portugal)	ObservedSpecimen	Palearctic	Portugal	Azores	Terceira	Praia da Vitória	Paul da Praia da Vitória	38°44'5.915"N, 27°3'36.131"W	38.735	-27.06	WGS84	6	10	2017.4.6	2017	LIFECWR TEAM	2	Animalia	Chordata	Aves	Anseriformes	Anatidae	Anas	acuta		Anas acuta	Linnaeus, 1758	Anas acuta Linnaeus, 1758	species	Sofia Goulart, Mariana R. Brito and Sónia Santos	2017
11086	FieldObservation	https://creativecommons.org/licenses/by/4.0/legalcode	UAc	0a80feca-b411-428a-a34e-c5c2fa07cdba	Birds from Praia da Vitória marshes (Terceira, Azores, Portugal)	ObservedSpecimen	Palearctic	Portugal	Azores	Terceira	Praia da Vitória	Paul da Praia da Vitória	38°44'5.915"N, 27°3'36.131"W	38.735	-27.06	WGS84	6	10	2017.5.18	2017	LIFECWR TEAM	2	Animalia	Chordata	Aves	Anseriformes	Anatidae	Anas	acuta		Anas acuta	Linnaeus, 1758	Anas acuta Linnaeus, 1758	species	Sofia Goulart, Mariana R. Brito and Sónia Santos	2017
11097	FieldObservation	https://creativecommons.org/licenses/by/4.0/legalcode	UAc	0a80feca-b411-428a-a34e-c5c2fa07cdba	Birds from Praia da Vitória marshes (Terceira, Azores, Portugal)	ObservedSpecimen	Palearctic	Portugal	Azores	Terceira	Praia da Vitória	Paul da Praia da Vitória	38°44'5.915"N, 27°3'36.131"W	38.735	-27.06	WGS84	6	10	2017.5.19	2017	LIFECWR TEAM	2	Animalia	Chordata	Aves	Anseriformes	Anatidae	Anas	acuta		Anas acuta	Linnaeus, 1758	Anas acuta Linnaeus, 1758	species	Sofia Goulart, Mariana R. Brito and Sónia Santos	2017
11107	FieldObservation	https://creativecommons.org/licenses/by/4.0/legalcode	UAc	0a80feca-b411-428a-a34e-c5c2fa07cdba	Birds from Praia da Vitória marshes (Terceira, Azores, Portugal)	ObservedSpecimen	Palearctic	Portugal	Azores	Terceira	Praia da Vitória	Paul da Praia da Vitória	38°44'5.915"N, 27°3'36.131"W	38.735	-27.06	WGS84	6	10	2017.5.29	2017	LIFECWR TEAM	2	Animalia	Chordata	Aves	Anseriformes	Anatidae	Anas	acuta		Anas acuta	Linnaeus, 1758	Anas acuta Linnaeus, 1758	species	Sofia Goulart, Mariana R. Brito and Sónia Santos	2017
11269	FieldObservation	https://creativecommons.org/licenses/by/4.0/legalcode	UAc	0a80feca-b411-428a-a34e-c5c2fa07cdba	Birds from Praia da Vitória marshes (Terceira, Azores, Portugal)	ObservedSpecimen	Palearctic	Portugal	Azores	Terceira	Praia da Vitória	Paul da Praia da Vitória	38°44'5.915"N, 27°3'36.131"W	38.735	-27.06	WGS84	6	10	2017.6.6	2017	LIFECWR TEAM	2	Animalia	Chordata	Aves	Anseriformes	Anatidae	Anas	acuta		Anas acuta	Linnaeus, 1758	Anas acuta Linnaeus, 1758	species	Sofia Goulart, Mariana R. Brito and Sónia Santos	2017
11281	FieldObservation	https://creativecommons.org/licenses/by/4.0/legalcode	UAc	0a80feca-b411-428a-a34e-c5c2fa07cdba	Birds from Praia da Vitória marshes (Terceira, Azores, Portugal)	ObservedSpecimen	Palearctic	Portugal	Azores	Terceira	Praia da Vitória	Paul da Praia da Vitória	38°44'5.915"N, 27°3'36.131"W	38.735	-27.06	WGS84	6	10	2017.6.7	2017	LIFECWR TEAM	2	Animalia	Chordata	Aves	Anseriformes	Anatidae	Anas	acuta		Anas acuta	Linnaeus, 1758	Anas acuta Linnaeus, 1758	species	Sofia Goulart, Mariana R. Brito and Sónia Santos	2017
12132	FieldObservation	https://creativecommons.org/licenses/by/4.0/legalcode	UAc	0a80feca-b411-428a-a34e-c5c2fa07cdba	Birds from Praia da Vitória marshes (Terceira, Azores, Portugal)	ObservedSpecimen	Palearctic	Portugal	Azores	Terceira	Praia da Vitória	Paul da Praia da Vitória	38°44'5.915"N, 27°3'36.131"W	38.735	-27.06	WGS84	6	10	2018.1.19	2018	LIFECWR TEAM	1	Animalia	Chordata	Aves	Anseriformes	Anatidae	Anas	acuta		Anas acuta	Linnaeus, 1758	Anas acuta Linnaeus, 1758	species	Sofia Goulart, Mariana R. Brito and Sónia Santos	2018
12137	FieldObservation	https://creativecommons.org/licenses/by/4.0/legalcode	UAc	0a80feca-b411-428a-a34e-c5c2fa07cdba	Birds from Praia da Vitória marshes (Terceira, Azores, Portugal)	ObservedSpecimen	Palearctic	Portugal	Azores	Terceira	Praia da Vitória	Paul da Praia da Vitória	38°44'5.915"N, 27°3'36.131"W	38.735	-27.06	WGS84	6	10	2018.1.24	2018	LIFECWR TEAM	1	Animalia	Chordata	Aves	Anseriformes	Anatidae	Anas	acuta		Anas acuta	Linnaeus, 1758	Anas acuta Linnaeus, 1758	species	Sofia Goulart, Mariana R. Brito and Sónia Santos	2018
12145	FieldObservation	https://creativecommons.org/licenses/by/4.0/legalcode	UAc	0a80feca-b411-428a-a34e-c5c2fa07cdba	Birds from Praia da Vitória marshes (Terceira, Azores, Portugal)	ObservedSpecimen	Palearctic	Portugal	Azores	Terceira	Praia da Vitória	Paul da Praia da Vitória	38°44'5.915"N, 27°3'36.131"W	38.735	-27.06	WGS84	6	10	2018.1.8	2018	LIFECWR TEAM	1	Animalia	Chordata	Aves	Anseriformes	Anatidae	Anas	acuta		Anas acuta	Linnaeus, 1758	Anas acuta Linnaeus, 1758	species	Sofia Goulart, Mariana R. Brito and Sónia Santos	2018
205	FieldObservation	https://creativecommons.org/licenses/by/4.0/legalcode	UAc	0a80feca-b411-428a-a34e-c5c2fa07cdba	Birds from Praia da Vitória marshes (Terceira, Azores, Portugal)	ObservedSpecimen	Palearctic	Portugal	Azores	Terceira	Praia da Vitória	Paul da Praia da Vitória	38°44'5.915"N, 27°3'36.131"W	38.735	-27.06	WGS84	6	10	2018.02.08	2018	LIFECWR TEAM	2	Animalia	Chordata	Aves	Anseriformes	Anatidae	Anas	americana		Anas americana	Gmelin, 1789	Anas americana Gmelin, 1789	species	Sofia Goulart, Mariana R. Brito and Sónia Santos	2018
380	FieldObservation	https://creativecommons.org/licenses/by/4.0/legalcode	UAc	0a80feca-b411-428a-a34e-c5c2fa07cdba	Birds from Praia da Vitória marshes (Terceira, Azores, Portugal)	ObservedSpecimen	Palearctic	Portugal	Azores	Terceira	Praia da Vitória	Paul da Praia da Vitória	38°44'5.915"N, 27°3'36.131"W	38.735	-27.06	WGS84	6	10	2018.02.15	2018	LIFECWR TEAM	2	Animalia	Chordata	Aves	Anseriformes	Anatidae	Anas	americana		Anas americana	Gmelin, 1789	Anas americana Gmelin, 1789	species	Sofia Goulart, Mariana R. Brito and Sónia Santos	2018
1050	FieldObservation	https://creativecommons.org/licenses/by/4.0/legalcode	UAc	0a80feca-b411-428a-a34e-c5c2fa07cdba	Birds from Praia da Vitória marshes (Terceira, Azores, Portugal)	ObservedSpecimen	Palearctic	Portugal	Azores	Terceira	Praia da Vitória	Paul da Praia da Vitória	38°44'5.915"N, 27°3'36.131"W	38.735	-27.06	WGS84	6	10	2013.11.12	2013	LIFECWR TEAM	9	Animalia	Chordata	Aves	Anseriformes	Anatidae	Anas	americana		Anas americana	Gmelin, 1789	Anas americana Gmelin, 1789	species	Sofia Goulart, Mariana R. Brito and Sónia Santos	2013
1074	FieldObservation	https://creativecommons.org/licenses/by/4.0/legalcode	UAc	0a80feca-b411-428a-a34e-c5c2fa07cdba	Birds from Praia da Vitória marshes (Terceira, Azores, Portugal)	ObservedSpecimen	Palearctic	Portugal	Azores	Terceira	Praia da Vitória	Paul da Praia da Vitória	38°44'5.915"N, 27°3'36.131"W	38.735	-27.06	WGS84	6	10	2013.11.13	2013	LIFECWR TEAM	5	Animalia	Chordata	Aves	Anseriformes	Anatidae	Anas	americana		Anas americana	Gmelin, 1789	Anas americana Gmelin, 1789	species	Sofia Goulart, Mariana R. Brito and Sónia Santos	2013
1096	FieldObservation	https://creativecommons.org/licenses/by/4.0/legalcode	UAc	0a80feca-b411-428a-a34e-c5c2fa07cdba	Birds from Praia da Vitória marshes (Terceira, Azores, Portugal)	ObservedSpecimen	Palearctic	Portugal	Azores	Terceira	Praia da Vitória	Paul da Praia da Vitória	38°44'5.915"N, 27°3'36.131"W	38.735	-27.06	WGS84	6	10	2013.11.15	2013	LIFECWR TEAM	3	Animalia	Chordata	Aves	Anseriformes	Anatidae	Anas	americana		Anas americana	Gmelin, 1789	Anas americana Gmelin, 1789	species	Sofia Goulart, Mariana R. Brito and Sónia Santos	2013
1120	FieldObservation	https://creativecommons.org/licenses/by/4.0/legalcode	UAc	0a80feca-b411-428a-a34e-c5c2fa07cdba	Birds from Praia da Vitória marshes (Terceira, Azores, Portugal)	ObservedSpecimen	Palearctic	Portugal	Azores	Terceira	Praia da Vitória	Paul da Praia da Vitória	38°44'5.915"N, 27°3'36.131"W	38.735	-27.06	WGS84	6	10	2013.11.18	2013	LIFECWR TEAM	5	Animalia	Chordata	Aves	Anseriformes	Anatidae	Anas	americana		Anas americana	Gmelin, 1789	Anas americana Gmelin, 1789	species	Sofia Goulart, Mariana R. Brito and Sónia Santos	2013
1222	FieldObservation	https://creativecommons.org/licenses/by/4.0/legalcode	UAc	0a80feca-b411-428a-a34e-c5c2fa07cdba	Birds from Praia da Vitória marshes (Terceira, Azores, Portugal)	ObservedSpecimen	Palearctic	Portugal	Azores	Terceira	Praia da Vitória	Paul da Pedreira do Cabo da Praia	38°42'15,538"N, 27°2'47,222"W	38.7043	-27.0465	WGS84	3	10	2013.11.27	2013	LIFECWR TEAM	2	Animalia	Chordata	Aves	Anseriformes	Anatidae	Anas	americana		Anas americana	Gmelin, 1789	Anas americana Gmelin, 1789	species	Sofia Goulart, Mariana R. Brito and Sónia Santos	2013
1244	FieldObservation	https://creativecommons.org/licenses/by/4.0/legalcode	UAc	0a80feca-b411-428a-a34e-c5c2fa07cdba	Birds from Praia da Vitória marshes (Terceira, Azores, Portugal)	ObservedSpecimen	Palearctic	Portugal	Azores	Terceira	Praia da Vitória	Paul da Pedreira do Cabo da Praia	38°42'15,538"N, 27°2'47,222"W	38.7043	-27.0465	WGS84	3	10	2013.11.28	2013	LIFECWR TEAM	3	Animalia	Chordata	Aves	Anseriformes	Anatidae	Anas	americana		Anas americana	Gmelin, 1789	Anas americana Gmelin, 1789	species	Sofia Goulart, Mariana R. Brito and Sónia Santos	2013
1265	FieldObservation	https://creativecommons.org/licenses/by/4.0/legalcode	UAc	0a80feca-b411-428a-a34e-c5c2fa07cdba	Birds from Praia da Vitória marshes (Terceira, Azores, Portugal)	ObservedSpecimen	Palearctic	Portugal	Azores	Terceira	Praia da Vitória	Paul da Pedreira do Cabo da Praia	38°42'15,538"N, 27°2'47,222"W	38.7043	-27.0465	WGS84	3	10	2013.11.29	2013	LIFECWR TEAM	2	Animalia	Chordata	Aves	Anseriformes	Anatidae	Anas	americana		Anas americana	Gmelin, 1789	Anas americana Gmelin, 1789	species	Sofia Goulart, Mariana R. Brito and Sónia Santos	2013
1398	FieldObservation	https://creativecommons.org/licenses/by/4.0/legalcode	UAc	0a80feca-b411-428a-a34e-c5c2fa07cdba	Birds from Praia da Vitória marshes (Terceira, Azores, Portugal)	ObservedSpecimen	Palearctic	Portugal	Azores	Terceira	Praia da Vitória	Paul da Praia da Vitória	38°44'5.915"N, 27°3'36.131"W	38.735	-27.06	WGS84	6	10	2013.12.13	2013	LIFECWR TEAM	1	Animalia	Chordata	Aves	Anseriformes	Anatidae	Anas	americana		Anas americana	Gmelin, 1789	Anas americana Gmelin, 1789	species	Sofia Goulart, Mariana R. Brito and Sónia Santos	2013
1432	FieldObservation	https://creativecommons.org/licenses/by/4.0/legalcode	UAc	0a80feca-b411-428a-a34e-c5c2fa07cdba	Birds from Praia da Vitória marshes (Terceira, Azores, Portugal)	ObservedSpecimen	Palearctic	Portugal	Azores	Terceira	Praia da Vitória	Paul da Praia da Vitória	38°44'5.915"N, 27°3'36.131"W	38.735	-27.06	WGS84	6	10	2013.12.17	2013	LIFECWR TEAM	12	Animalia	Chordata	Aves	Anseriformes	Anatidae	Anas	americana		Anas americana	Gmelin, 1789	Anas americana Gmelin, 1789	species	Sofia Goulart, Mariana R. Brito and Sónia Santos	2013
1451	FieldObservation	https://creativecommons.org/licenses/by/4.0/legalcode	UAc	0a80feca-b411-428a-a34e-c5c2fa07cdba	Birds from Praia da Vitória marshes (Terceira, Azores, Portugal)	ObservedSpecimen	Palearctic	Portugal	Azores	Terceira	Praia da Vitória	Paul da Praia da Vitória	38°44'5.915"N, 27°3'36.131"W	38.735	-27.06	WGS84	6	10	2013.12.18	2013	LIFECWR TEAM	12	Animalia	Chordata	Aves	Anseriformes	Anatidae	Anas	americana		Anas americana	Gmelin, 1789	Anas americana Gmelin, 1789	species	Sofia Goulart, Mariana R. Brito and Sónia Santos	2013
1458	FieldObservation	https://creativecommons.org/licenses/by/4.0/legalcode	UAc	0a80feca-b411-428a-a34e-c5c2fa07cdba	Birds from Praia da Vitória marshes (Terceira, Azores, Portugal)	ObservedSpecimen	Palearctic	Portugal	Azores	Terceira	Praia da Vitória	Paul da Praia da Vitória	38°44'5.915"N, 27°3'36.131"W	38.735	-27.06	WGS84	6	10	2013.12.19	2013	LIFECWR TEAM	9	Animalia	Chordata	Aves	Anseriformes	Anatidae	Anas	americana		Anas americana	Gmelin, 1789	Anas americana Gmelin, 1789	species	Sofia Goulart, Mariana R. Brito and Sónia Santos	2013
1494	FieldObservation	https://creativecommons.org/licenses/by/4.0/legalcode	UAc	0a80feca-b411-428a-a34e-c5c2fa07cdba	Birds from Praia da Vitória marshes (Terceira, Azores, Portugal)	ObservedSpecimen	Palearctic	Portugal	Azores	Terceira	Praia da Vitória	Paul da Praia da Vitória	38°44'5.915"N, 27°3'36.131"W	38.735	-27.06	WGS84	6	10	2013.12.20	2013	LIFECWR TEAM	8	Animalia	Chordata	Aves	Anseriformes	Anatidae	Anas	americana		Anas americana	Gmelin, 1789	Anas americana Gmelin, 1789	species	Sofia Goulart, Mariana R. Brito and Sónia Santos	2013
1529	FieldObservation	https://creativecommons.org/licenses/by/4.0/legalcode	UAc	0a80feca-b411-428a-a34e-c5c2fa07cdba	Birds from Praia da Vitória marshes (Terceira, Azores, Portugal)	ObservedSpecimen	Palearctic	Portugal	Azores	Terceira	Praia da Vitória	Paul da Praia da Vitória	38°44'5.915"N, 27°3'36.131"W	38.735	-27.06	WGS84	6	10	2013.12.27	2013	LIFECWR TEAM	12	Animalia	Chordata	Aves	Anseriformes	Anatidae	Anas	americana		Anas americana	Gmelin, 1789	Anas americana Gmelin, 1789	species	Sofia Goulart, Mariana R. Brito and Sónia Santos	2013
1537	FieldObservation	https://creativecommons.org/licenses/by/4.0/legalcode	UAc	0a80feca-b411-428a-a34e-c5c2fa07cdba	Birds from Praia da Vitória marshes (Terceira, Azores, Portugal)	ObservedSpecimen	Palearctic	Portugal	Azores	Terceira	Praia da Vitória	Paul da Praia da Vitória	38°44'5.915"N, 27°3'36.131"W	38.735	-27.06	WGS84	6	10	2013.12.30	2013	LIFECWR TEAM	8	Animalia	Chordata	Aves	Anseriformes	Anatidae	Anas	americana		Anas americana	Gmelin, 1789	Anas americana Gmelin, 1789	species	Sofia Goulart, Mariana R. Brito and Sónia Santos	2013
1563	FieldObservation	https://creativecommons.org/licenses/by/4.0/legalcode	UAc	0a80feca-b411-428a-a34e-c5c2fa07cdba	Birds from Praia da Vitória marshes (Terceira, Azores, Portugal)	ObservedSpecimen	Palearctic	Portugal	Azores	Terceira	Praia da Vitória	Paul da Pedreira do Cabo da Praia	38°42'15,538"N, 27°2'47,222"W	38.7043	-27.0465	WGS84	3	10	2013.12.4	2013	LIFECWR TEAM	2	Animalia	Chordata	Aves	Anseriformes	Anatidae	Anas	americana		Anas americana	Gmelin, 1789	Anas americana Gmelin, 1789	species	Sofia Goulart, Mariana R. Brito and Sónia Santos	2013
1581	FieldObservation	https://creativecommons.org/licenses/by/4.0/legalcode	UAc	0a80feca-b411-428a-a34e-c5c2fa07cdba	Birds from Praia da Vitória marshes (Terceira, Azores, Portugal)	ObservedSpecimen	Palearctic	Portugal	Azores	Terceira	Praia da Vitória	Paul da Praia da Vitória	38°44'5.915"N, 27°3'36.131"W	38.735	-27.06	WGS84	6	10	2013.12.6	2013	LIFECWR TEAM	2	Animalia	Chordata	Aves	Anseriformes	Anatidae	Anas	americana		Anas americana	Gmelin, 1789	Anas americana Gmelin, 1789	species	Sofia Goulart, Mariana R. Brito and Sónia Santos	2013
2088	FieldObservation	https://creativecommons.org/licenses/by/4.0/legalcode	UAc	0a80feca-b411-428a-a34e-c5c2fa07cdba	Birds from Praia da Vitória marshes (Terceira, Azores, Portugal)	ObservedSpecimen	Palearctic	Portugal	Azores	Terceira	Praia da Vitória	Paul da Praia da Vitória	38°44'5.915"N, 27°3'36.131"W	38.735	-27.06	WGS84	6	10	2014.1.10	2014	LIFECWR TEAM	10	Animalia	Chordata	Aves	Anseriformes	Anatidae	Anas	americana		Anas americana	Gmelin, 1789	Anas americana Gmelin, 1789	species	Sofia Goulart, Mariana R. Brito and Sónia Santos	2014
2095	FieldObservation	https://creativecommons.org/licenses/by/4.0/legalcode	UAc	0a80feca-b411-428a-a34e-c5c2fa07cdba	Birds from Praia da Vitória marshes (Terceira, Azores, Portugal)	ObservedSpecimen	Palearctic	Portugal	Azores	Terceira	Praia da Vitória	Paul da Praia da Vitória	38°44'5.915"N, 27°3'36.131"W	38.735	-27.06	WGS84	6	10	2014.1.13	2014	LIFECWR TEAM	10	Animalia	Chordata	Aves	Anseriformes	Anatidae	Anas	americana		Anas americana	Gmelin, 1789	Anas americana Gmelin, 1789	species	Sofia Goulart, Mariana R. Brito and Sónia Santos	2014
2117	FieldObservation	https://creativecommons.org/licenses/by/4.0/legalcode	UAc	0a80feca-b411-428a-a34e-c5c2fa07cdba	Birds from Praia da Vitória marshes (Terceira, Azores, Portugal)	ObservedSpecimen	Palearctic	Portugal	Azores	Terceira	Praia da Vitória	Paul da Praia da Vitória	38°44'5.915"N, 27°3'36.131"W	38.735	-27.06	WGS84	6	10	2014.1.15	2014	LIFECWR TEAM	11	Animalia	Chordata	Aves	Anseriformes	Anatidae	Anas	americana		Anas americana	Gmelin, 1789	Anas americana Gmelin, 1789	species	Sofia Goulart, Mariana R. Brito and Sónia Santos	2014
2139	FieldObservation	https://creativecommons.org/licenses/by/4.0/legalcode	UAc	0a80feca-b411-428a-a34e-c5c2fa07cdba	Birds from Praia da Vitória marshes (Terceira, Azores, Portugal)	ObservedSpecimen	Palearctic	Portugal	Azores	Terceira	Praia da Vitória	Paul da Praia da Vitória	38°44'5.915"N, 27°3'36.131"W	38.735	-27.06	WGS84	6	10	2014.1.16	2014	LIFECWR TEAM	7	Animalia	Chordata	Aves	Anseriformes	Anatidae	Anas	americana		Anas americana	Gmelin, 1789	Anas americana Gmelin, 1789	species	Sofia Goulart, Mariana R. Brito and Sónia Santos	2014
2155	FieldObservation	https://creativecommons.org/licenses/by/4.0/legalcode	UAc	0a80feca-b411-428a-a34e-c5c2fa07cdba	Birds from Praia da Vitória marshes (Terceira, Azores, Portugal)	ObservedSpecimen	Palearctic	Portugal	Azores	Terceira	Praia da Vitória	Paul da Praia da Vitória	38°44'5.915"N, 27°3'36.131"W	38.735	-27.06	WGS84	6	10	2014.1.2	2014	LIFECWR TEAM	15	Animalia	Chordata	Aves	Anseriformes	Anatidae	Anas	americana		Anas americana	Gmelin, 1789	Anas americana Gmelin, 1789	species	Sofia Goulart, Mariana R. Brito and Sónia Santos	2014
2175	FieldObservation	https://creativecommons.org/licenses/by/4.0/legalcode	UAc	0a80feca-b411-428a-a34e-c5c2fa07cdba	Birds from Praia da Vitória marshes (Terceira, Azores, Portugal)	ObservedSpecimen	Palearctic	Portugal	Azores	Terceira	Praia da Vitória	Paul da Praia da Vitória	38°44'5.915"N, 27°3'36.131"W	38.735	-27.06	WGS84	6	10	2014.1.20	2014	LIFECWR TEAM	7	Animalia	Chordata	Aves	Anseriformes	Anatidae	Anas	americana		Anas americana	Gmelin, 1789	Anas americana Gmelin, 1789	species	Sofia Goulart, Mariana R. Brito and Sónia Santos	2014
2217	FieldObservation	https://creativecommons.org/licenses/by/4.0/legalcode	UAc	0a80feca-b411-428a-a34e-c5c2fa07cdba	Birds from Praia da Vitória marshes (Terceira, Azores, Portugal)	ObservedSpecimen	Palearctic	Portugal	Azores	Terceira	Praia da Vitória	Paul da Praia da Vitória	38°44'5.915"N, 27°3'36.131"W	38.735	-27.06	WGS84	6	10	2014.1.22	2014	LIFECWR TEAM	6	Animalia	Chordata	Aves	Anseriformes	Anatidae	Anas	americana		Anas americana	Gmelin, 1789	Anas americana Gmelin, 1789	species	Sofia Goulart, Mariana R. Brito and Sónia Santos	2014
2240	FieldObservation	https://creativecommons.org/licenses/by/4.0/legalcode	UAc	0a80feca-b411-428a-a34e-c5c2fa07cdba	Birds from Praia da Vitória marshes (Terceira, Azores, Portugal)	ObservedSpecimen	Palearctic	Portugal	Azores	Terceira	Praia da Vitória	Paul da Praia da Vitória	38°44'5.915"N, 27°3'36.131"W	38.735	-27.06	WGS84	6	10	2014.1.23	2014	LIFECWR TEAM	7	Animalia	Chordata	Aves	Anseriformes	Anatidae	Anas	americana		Anas americana	Gmelin, 1789	Anas americana Gmelin, 1789	species	Sofia Goulart, Mariana R. Brito and Sónia Santos	2014
2260	FieldObservation	https://creativecommons.org/licenses/by/4.0/legalcode	UAc	0a80feca-b411-428a-a34e-c5c2fa07cdba	Birds from Praia da Vitória marshes (Terceira, Azores, Portugal)	ObservedSpecimen	Palearctic	Portugal	Azores	Terceira	Praia da Vitória	Paul da Praia da Vitória	38°44'5.915"N, 27°3'36.131"W	38.735	-27.06	WGS84	6	10	2014.1.28	2014	LIFECWR TEAM	9	Animalia	Chordata	Aves	Anseriformes	Anatidae	Anas	americana		Anas americana	Gmelin, 1789	Anas americana Gmelin, 1789	species	Sofia Goulart, Mariana R. Brito and Sónia Santos	2014
2284	FieldObservation	https://creativecommons.org/licenses/by/4.0/legalcode	UAc	0a80feca-b411-428a-a34e-c5c2fa07cdba	Birds from Praia da Vitória marshes (Terceira, Azores, Portugal)	ObservedSpecimen	Palearctic	Portugal	Azores	Terceira	Praia da Vitória	Paul da Praia da Vitória	38°44'5.915"N, 27°3'36.131"W	38.735	-27.06	WGS84	6	10	2014.1.29	2014	LIFECWR TEAM	9	Animalia	Chordata	Aves	Anseriformes	Anatidae	Anas	americana		Anas americana	Gmelin, 1789	Anas americana Gmelin, 1789	species	Sofia Goulart, Mariana R. Brito and Sónia Santos	2014
2305	FieldObservation	https://creativecommons.org/licenses/by/4.0/legalcode	UAc	0a80feca-b411-428a-a34e-c5c2fa07cdba	Birds from Praia da Vitória marshes (Terceira, Azores, Portugal)	ObservedSpecimen	Palearctic	Portugal	Azores	Terceira	Praia da Vitória	Paul da Praia da Vitória	38°44'5.915"N, 27°3'36.131"W	38.735	-27.06	WGS84	6	10	2014.1.3	2014	LIFECWR TEAM	4	Animalia	Chordata	Aves	Anseriformes	Anatidae	Anas	americana		Anas americana	Gmelin, 1789	Anas americana Gmelin, 1789	species	Sofia Goulart, Mariana R. Brito and Sónia Santos	2014
2317	FieldObservation	https://creativecommons.org/licenses/by/4.0/legalcode	UAc	0a80feca-b411-428a-a34e-c5c2fa07cdba	Birds from Praia da Vitória marshes (Terceira, Azores, Portugal)	ObservedSpecimen	Palearctic	Portugal	Azores	Terceira	Praia da Vitória	Paul da Praia da Vitória	38°44'5.915"N, 27°3'36.131"W	38.735	-27.06	WGS84	6	10	2014.1.6	2014	LIFECWR TEAM	7	Animalia	Chordata	Aves	Anseriformes	Anatidae	Anas	americana		Anas americana	Gmelin, 1789	Anas americana Gmelin, 1789	species	Sofia Goulart, Mariana R. Brito and Sónia Santos	2014
2348	FieldObservation	https://creativecommons.org/licenses/by/4.0/legalcode	UAc	0a80feca-b411-428a-a34e-c5c2fa07cdba	Birds from Praia da Vitória marshes (Terceira, Azores, Portugal)	ObservedSpecimen	Palearctic	Portugal	Azores	Terceira	Praia da Vitória	Paul da Praia da Vitória	38°44'5.915"N, 27°3'36.131"W	38.735	-27.06	WGS84	6	10	2014.1.9	2014	LIFECWR TEAM	10	Animalia	Chordata	Aves	Anseriformes	Anatidae	Anas	americana		Anas americana	Gmelin, 1789	Anas americana Gmelin, 1789	species	Sofia Goulart, Mariana R. Brito and Sónia Santos	2014
2781	FieldObservation	https://creativecommons.org/licenses/by/4.0/legalcode	UAc	0a80feca-b411-428a-a34e-c5c2fa07cdba	Birds from Praia da Vitória marshes (Terceira, Azores, Portugal)	ObservedSpecimen	Palearctic	Portugal	Azores	Terceira	Praia da Vitória	Paul da Praia da Vitória	38°44'5.915"N, 27°3'36.131"W	38.735	-27.06	WGS84	6	10	2014.11.13	2014	LIFECWR TEAM	6	Animalia	Chordata	Aves	Anseriformes	Anatidae	Anas	americana		Anas americana	Gmelin, 1789	Anas americana Gmelin, 1789	species	Sofia Goulart, Mariana R. Brito and Sónia Santos	2014
2803	FieldObservation	https://creativecommons.org/licenses/by/4.0/legalcode	UAc	0a80feca-b411-428a-a34e-c5c2fa07cdba	Birds from Praia da Vitória marshes (Terceira, Azores, Portugal)	ObservedSpecimen	Palearctic	Portugal	Azores	Terceira	Praia da Vitória	Paul da Praia da Vitória	38°44'5.915"N, 27°3'36.131"W	38.735	-27.06	WGS84	6	10	2014.11.14	2014	LIFECWR TEAM	9	Animalia	Chordata	Aves	Anseriformes	Anatidae	Anas	americana		Anas americana	Gmelin, 1789	Anas americana Gmelin, 1789	species	Sofia Goulart, Mariana R. Brito and Sónia Santos	2014
2840	FieldObservation	https://creativecommons.org/licenses/by/4.0/legalcode	UAc	0a80feca-b411-428a-a34e-c5c2fa07cdba	Birds from Praia da Vitória marshes (Terceira, Azores, Portugal)	ObservedSpecimen	Palearctic	Portugal	Azores	Terceira	Praia da Vitória	Paul da Praia da Vitória	38°44'5.915"N, 27°3'36.131"W	38.735	-27.06	WGS84	6	10	2014.11.25	2014	LIFECWR TEAM	1	Animalia	Chordata	Aves	Anseriformes	Anatidae	Anas	americana		Anas americana	Gmelin, 1789	Anas americana Gmelin, 1789	species	Sofia Goulart, Mariana R. Brito and Sónia Santos	2014
2845	FieldObservation	https://creativecommons.org/licenses/by/4.0/legalcode	UAc	0a80feca-b411-428a-a34e-c5c2fa07cdba	Birds from Praia da Vitória marshes (Terceira, Azores, Portugal)	ObservedSpecimen	Palearctic	Portugal	Azores	Terceira	Praia da Vitória	Paul da Praia da Vitória	38°44'5.915"N, 27°3'36.131"W	38.735	-27.06	WGS84	6	10	2014.11.26	2014	LIFECWR TEAM	11	Animalia	Chordata	Aves	Anseriformes	Anatidae	Anas	americana		Anas americana	Gmelin, 1789	Anas americana Gmelin, 1789	species	Sofia Goulart, Mariana R. Brito and Sónia Santos	2014
2963	FieldObservation	https://creativecommons.org/licenses/by/4.0/legalcode	UAc	0a80feca-b411-428a-a34e-c5c2fa07cdba	Birds from Praia da Vitória marshes (Terceira, Azores, Portugal)	ObservedSpecimen	Palearctic	Portugal	Azores	Terceira	Praia da Vitória	Paul da Praia da Vitória	38°44'5.915"N, 27°3'36.131"W	38.735	-27.06	WGS84	6	10	2014.12.4	2014	LIFECWR TEAM	12	Animalia	Chordata	Aves	Anseriformes	Anatidae	Anas	americana		Anas americana	Gmelin, 1789	Anas americana Gmelin, 1789	species	Sofia Goulart, Mariana R. Brito and Sónia Santos	2014
2976	FieldObservation	https://creativecommons.org/licenses/by/4.0/legalcode	UAc	0a80feca-b411-428a-a34e-c5c2fa07cdba	Birds from Praia da Vitória marshes (Terceira, Azores, Portugal)	ObservedSpecimen	Palearctic	Portugal	Azores	Terceira	Praia da Vitória	Paul da Praia da Vitória	38°44'5.915"N, 27°3'36.131"W	38.735	-27.06	WGS84	6	10	2014.2.10	2014	LIFECWR TEAM	7	Animalia	Chordata	Aves	Anseriformes	Anatidae	Anas	americana		Anas americana	Gmelin, 1789	Anas americana Gmelin, 1789	species	Sofia Goulart, Mariana R. Brito and Sónia Santos	2014
2995	FieldObservation	https://creativecommons.org/licenses/by/4.0/legalcode	UAc	0a80feca-b411-428a-a34e-c5c2fa07cdba	Birds from Praia da Vitória marshes (Terceira, Azores, Portugal)	ObservedSpecimen	Palearctic	Portugal	Azores	Terceira	Praia da Vitória	Paul da Praia da Vitória	38°44'5.915"N, 27°3'36.131"W	38.735	-27.06	WGS84	6	10	2014.2.11	2014	LIFECWR TEAM	11	Animalia	Chordata	Aves	Anseriformes	Anatidae	Anas	americana		Anas americana	Gmelin, 1789	Anas americana Gmelin, 1789	species	Sofia Goulart, Mariana R. Brito and Sónia Santos	2014
3017	FieldObservation	https://creativecommons.org/licenses/by/4.0/legalcode	UAc	0a80feca-b411-428a-a34e-c5c2fa07cdba	Birds from Praia da Vitória marshes (Terceira, Azores, Portugal)	ObservedSpecimen	Palearctic	Portugal	Azores	Terceira	Praia da Vitória	Paul da Praia da Vitória	38°44'5.915"N, 27°3'36.131"W	38.735	-27.06	WGS84	6	10	2014.2.12	2014	LIFECWR TEAM	7	Animalia	Chordata	Aves	Anseriformes	Anatidae	Anas	americana		Anas americana	Gmelin, 1789	Anas americana Gmelin, 1789	species	Sofia Goulart, Mariana R. Brito and Sónia Santos	2014
3036	FieldObservation	https://creativecommons.org/licenses/by/4.0/legalcode	UAc	0a80feca-b411-428a-a34e-c5c2fa07cdba	Birds from Praia da Vitória marshes (Terceira, Azores, Portugal)	ObservedSpecimen	Palearctic	Portugal	Azores	Terceira	Praia da Vitória	Paul da Praia da Vitória	38°44'5.915"N, 27°3'36.131"W	38.735	-27.06	WGS84	6	10	2014.2.13	2014	LIFECWR TEAM	11	Animalia	Chordata	Aves	Anseriformes	Anatidae	Anas	americana		Anas americana	Gmelin, 1789	Anas americana Gmelin, 1789	species	Sofia Goulart, Mariana R. Brito and Sónia Santos	2014
3048	FieldObservation	https://creativecommons.org/licenses/by/4.0/legalcode	UAc	0a80feca-b411-428a-a34e-c5c2fa07cdba	Birds from Praia da Vitória marshes (Terceira, Azores, Portugal)	ObservedSpecimen	Palearctic	Portugal	Azores	Terceira	Praia da Vitória	Paul da Praia da Vitória	38°44'5.915"N, 27°3'36.131"W	38.735	-27.06	WGS84	6	10	2014.2.14	2014	LIFECWR TEAM	5	Animalia	Chordata	Aves	Anseriformes	Anatidae	Anas	americana		Anas americana	Gmelin, 1789	Anas americana Gmelin, 1789	species	Sofia Goulart, Mariana R. Brito and Sónia Santos	2014
3055	FieldObservation	https://creativecommons.org/licenses/by/4.0/legalcode	UAc	0a80feca-b411-428a-a34e-c5c2fa07cdba	Birds from Praia da Vitória marshes (Terceira, Azores, Portugal)	ObservedSpecimen	Palearctic	Portugal	Azores	Terceira	Praia da Vitória	Paul da Praia da Vitória	38°44'5.915"N, 27°3'36.131"W	38.735	-27.06	WGS84	6	10	2014.2.17	2014	LIFECWR TEAM	11	Animalia	Chordata	Aves	Anseriformes	Anatidae	Anas	americana		Anas americana	Gmelin, 1789	Anas americana Gmelin, 1789	species	Sofia Goulart, Mariana R. Brito and Sónia Santos	2014
3073	FieldObservation	https://creativecommons.org/licenses/by/4.0/legalcode	UAc	0a80feca-b411-428a-a34e-c5c2fa07cdba	Birds from Praia da Vitória marshes (Terceira, Azores, Portugal)	ObservedSpecimen	Palearctic	Portugal	Azores	Terceira	Praia da Vitória	Paul da Praia da Vitória	38°44'5.915"N, 27°3'36.131"W	38.735	-27.06	WGS84	6	10	2014.2.19	2014	LIFECWR TEAM	9	Animalia	Chordata	Aves	Anseriformes	Anatidae	Anas	americana		Anas americana	Gmelin, 1789	Anas americana Gmelin, 1789	species	Sofia Goulart, Mariana R. Brito and Sónia Santos	2014
3093	FieldObservation	https://creativecommons.org/licenses/by/4.0/legalcode	UAc	0a80feca-b411-428a-a34e-c5c2fa07cdba	Birds from Praia da Vitória marshes (Terceira, Azores, Portugal)	ObservedSpecimen	Palearctic	Portugal	Azores	Terceira	Praia da Vitória	Paul da Praia da Vitória	38°44'5.915"N, 27°3'36.131"W	38.735	-27.06	WGS84	6	10	2014.2.20	2014	LIFECWR TEAM	7	Animalia	Chordata	Aves	Anseriformes	Anatidae	Anas	americana		Anas americana	Gmelin, 1789	Anas americana Gmelin, 1789	species	Sofia Goulart, Mariana R. Brito and Sónia Santos	2014
3132	FieldObservation	https://creativecommons.org/licenses/by/4.0/legalcode	UAc	0a80feca-b411-428a-a34e-c5c2fa07cdba	Birds from Praia da Vitória marshes (Terceira, Azores, Portugal)	ObservedSpecimen	Palearctic	Portugal	Azores	Terceira	Praia da Vitória	Paul da Praia da Vitória	38°44'5.915"N, 27°3'36.131"W	38.735	-27.06	WGS84	6	10	2014.2.24	2014	LIFECWR TEAM	11	Animalia	Chordata	Aves	Anseriformes	Anatidae	Anas	americana		Anas americana	Gmelin, 1789	Anas americana Gmelin, 1789	species	Sofia Goulart, Mariana R. Brito and Sónia Santos	2014
3152	FieldObservation	https://creativecommons.org/licenses/by/4.0/legalcode	UAc	0a80feca-b411-428a-a34e-c5c2fa07cdba	Birds from Praia da Vitória marshes (Terceira, Azores, Portugal)	ObservedSpecimen	Palearctic	Portugal	Azores	Terceira	Praia da Vitória	Paul da Praia da Vitória	38°44'5.915"N, 27°3'36.131"W	38.735	-27.06	WGS84	6	10	2014.2.25	2014	LIFECWR TEAM	6	Animalia	Chordata	Aves	Anseriformes	Anatidae	Anas	americana		Anas americana	Gmelin, 1789	Anas americana Gmelin, 1789	species	Sofia Goulart, Mariana R. Brito and Sónia Santos	2014
3172	FieldObservation	https://creativecommons.org/licenses/by/4.0/legalcode	UAc	0a80feca-b411-428a-a34e-c5c2fa07cdba	Birds from Praia da Vitória marshes (Terceira, Azores, Portugal)	ObservedSpecimen	Palearctic	Portugal	Azores	Terceira	Praia da Vitória	Paul da Praia da Vitória	38°44'5.915"N, 27°3'36.131"W	38.735	-27.06	WGS84	6	10	2014.2.26	2014	LIFECWR TEAM	7	Animalia	Chordata	Aves	Anseriformes	Anatidae	Anas	americana		Anas americana	Gmelin, 1789	Anas americana Gmelin, 1789	species	Sofia Goulart, Mariana R. Brito and Sónia Santos	2014
3186	FieldObservation	https://creativecommons.org/licenses/by/4.0/legalcode	UAc	0a80feca-b411-428a-a34e-c5c2fa07cdba	Birds from Praia da Vitória marshes (Terceira, Azores, Portugal)	ObservedSpecimen	Palearctic	Portugal	Azores	Terceira	Praia da Vitória	Paul da Praia da Vitória	38°44'5.915"N, 27°3'36.131"W	38.735	-27.06	WGS84	6	10	2014.2.27	2014	LIFECWR TEAM	13	Animalia	Chordata	Aves	Anseriformes	Anatidae	Anas	americana		Anas americana	Gmelin, 1789	Anas americana Gmelin, 1789	species	Sofia Goulart, Mariana R. Brito and Sónia Santos	2014
3207	FieldObservation	https://creativecommons.org/licenses/by/4.0/legalcode	UAc	0a80feca-b411-428a-a34e-c5c2fa07cdba	Birds from Praia da Vitória marshes (Terceira, Azores, Portugal)	ObservedSpecimen	Palearctic	Portugal	Azores	Terceira	Praia da Vitória	Paul da Praia da Vitória	38°44'5.915"N, 27°3'36.131"W	38.735	-27.06	WGS84	6	10	2014.2.28	2014	LIFECWR TEAM	7	Animalia	Chordata	Aves	Anseriformes	Anatidae	Anas	americana		Anas americana	Gmelin, 1789	Anas americana Gmelin, 1789	species	Sofia Goulart, Mariana R. Brito and Sónia Santos	2014
3236	FieldObservation	https://creativecommons.org/licenses/by/4.0/legalcode	UAc	0a80feca-b411-428a-a34e-c5c2fa07cdba	Birds from Praia da Vitória marshes (Terceira, Azores, Portugal)	ObservedSpecimen	Palearctic	Portugal	Azores	Terceira	Praia da Vitória	Paul da Praia da Vitória	38°44'5.915"N, 27°3'36.131"W	38.735	-27.06	WGS84	6	10	2014.2.6	2014	LIFECWR TEAM	11	Animalia	Chordata	Aves	Anseriformes	Anatidae	Anas	americana		Anas americana	Gmelin, 1789	Anas americana Gmelin, 1789	species	Sofia Goulart, Mariana R. Brito and Sónia Santos	2014
3270	FieldObservation	https://creativecommons.org/licenses/by/4.0/legalcode	UAc	0a80feca-b411-428a-a34e-c5c2fa07cdba	Birds from Praia da Vitória marshes (Terceira, Azores, Portugal)	ObservedSpecimen	Palearctic	Portugal	Azores	Terceira	Praia da Vitória	Paul da Praia da Vitória	38°44'5.915"N, 27°3'36.131"W	38.735	-27.06	WGS84	6	10	2014.3.11	2014	LIFECWR TEAM	10	Animalia	Chordata	Aves	Anseriformes	Anatidae	Anas	americana		Anas americana	Gmelin, 1789	Anas americana Gmelin, 1789	species	Sofia Goulart, Mariana R. Brito and Sónia Santos	2014
3283	FieldObservation	https://creativecommons.org/licenses/by/4.0/legalcode	UAc	0a80feca-b411-428a-a34e-c5c2fa07cdba	Birds from Praia da Vitória marshes (Terceira, Azores, Portugal)	ObservedSpecimen	Palearctic	Portugal	Azores	Terceira	Praia da Vitória	Paul da Praia da Vitória	38°44'5.915"N, 27°3'36.131"W	38.735	-27.06	WGS84	6	10	2014.3.12	2014	LIFECWR TEAM	8	Animalia	Chordata	Aves	Anseriformes	Anatidae	Anas	americana		Anas americana	Gmelin, 1789	Anas americana Gmelin, 1789	species	Sofia Goulart, Mariana R. Brito and Sónia Santos	2014
3298	FieldObservation	https://creativecommons.org/licenses/by/4.0/legalcode	UAc	0a80feca-b411-428a-a34e-c5c2fa07cdba	Birds from Praia da Vitória marshes (Terceira, Azores, Portugal)	ObservedSpecimen	Palearctic	Portugal	Azores	Terceira	Praia da Vitória	Paul da Praia da Vitória	38°44'5.915"N, 27°3'36.131"W	38.735	-27.06	WGS84	6	10	2014.3.14	2014	LIFECWR TEAM	7	Animalia	Chordata	Aves	Anseriformes	Anatidae	Anas	americana		Anas americana	Gmelin, 1789	Anas americana Gmelin, 1789	species	Sofia Goulart, Mariana R. Brito and Sónia Santos	2014
3317	FieldObservation	https://creativecommons.org/licenses/by/4.0/legalcode	UAc	0a80feca-b411-428a-a34e-c5c2fa07cdba	Birds from Praia da Vitória marshes (Terceira, Azores, Portugal)	ObservedSpecimen	Palearctic	Portugal	Azores	Terceira	Praia da Vitória	Paul da Praia da Vitória	38°44'5.915"N, 27°3'36.131"W	38.735	-27.06	WGS84	6	10	2014.3.17	2014	LIFECWR TEAM	2	Animalia	Chordata	Aves	Anseriformes	Anatidae	Anas	americana		Anas americana	Gmelin, 1789	Anas americana Gmelin, 1789	species	Sofia Goulart, Mariana R. Brito and Sónia Santos	2014
3330	FieldObservation	https://creativecommons.org/licenses/by/4.0/legalcode	UAc	0a80feca-b411-428a-a34e-c5c2fa07cdba	Birds from Praia da Vitória marshes (Terceira, Azores, Portugal)	ObservedSpecimen	Palearctic	Portugal	Azores	Terceira	Praia da Vitória	Paul da Praia da Vitória	38°44'5.915"N, 27°3'36.131"W	38.735	-27.06	WGS84	6	10	2014.3.18	2014	LIFECWR TEAM	5	Animalia	Chordata	Aves	Anseriformes	Anatidae	Anas	americana		Anas americana	Gmelin, 1789	Anas americana Gmelin, 1789	species	Sofia Goulart, Mariana R. Brito and Sónia Santos	2014
3347	FieldObservation	https://creativecommons.org/licenses/by/4.0/legalcode	UAc	0a80feca-b411-428a-a34e-c5c2fa07cdba	Birds from Praia da Vitória marshes (Terceira, Azores, Portugal)	ObservedSpecimen	Palearctic	Portugal	Azores	Terceira	Praia da Vitória	Paul da Praia da Vitória	38°44'5.915"N, 27°3'36.131"W	38.735	-27.06	WGS84	6	10	2014.3.20	2014	LIFECWR TEAM	9	Animalia	Chordata	Aves	Anseriformes	Anatidae	Anas	americana		Anas americana	Gmelin, 1789	Anas americana Gmelin, 1789	species	Sofia Goulart, Mariana R. Brito and Sónia Santos	2014
3367	FieldObservation	https://creativecommons.org/licenses/by/4.0/legalcode	UAc	0a80feca-b411-428a-a34e-c5c2fa07cdba	Birds from Praia da Vitória marshes (Terceira, Azores, Portugal)	ObservedSpecimen	Palearctic	Portugal	Azores	Terceira	Praia da Vitória	Paul da Praia da Vitória	38°44'5.915"N, 27°3'36.131"W	38.735	-27.06	WGS84	6	10	2014.3.21	2014	LIFECWR TEAM	10	Animalia	Chordata	Aves	Anseriformes	Anatidae	Anas	americana		Anas americana	Gmelin, 1789	Anas americana Gmelin, 1789	species	Sofia Goulart, Mariana R. Brito and Sónia Santos	2014
3381	FieldObservation	https://creativecommons.org/licenses/by/4.0/legalcode	UAc	0a80feca-b411-428a-a34e-c5c2fa07cdba	Birds from Praia da Vitória marshes (Terceira, Azores, Portugal)	ObservedSpecimen	Palearctic	Portugal	Azores	Terceira	Praia da Vitória	Paul da Praia da Vitória	38°44'5.915"N, 27°3'36.131"W	38.735	-27.06	WGS84	6	10	2014.3.24	2014	LIFECWR TEAM	5	Animalia	Chordata	Aves	Anseriformes	Anatidae	Anas	americana		Anas americana	Gmelin, 1789	Anas americana Gmelin, 1789	species	Sofia Goulart, Mariana R. Brito and Sónia Santos	2014
3395	FieldObservation	https://creativecommons.org/licenses/by/4.0/legalcode	UAc	0a80feca-b411-428a-a34e-c5c2fa07cdba	Birds from Praia da Vitória marshes (Terceira, Azores, Portugal)	ObservedSpecimen	Palearctic	Portugal	Azores	Terceira	Praia da Vitória	Paul da Praia da Vitória	38°44'5.915"N, 27°3'36.131"W	38.735	-27.06	WGS84	6	10	2014.3.25	2014	LIFECWR TEAM	5	Animalia	Chordata	Aves	Anseriformes	Anatidae	Anas	americana		Anas americana	Gmelin, 1789	Anas americana Gmelin, 1789	species	Sofia Goulart, Mariana R. Brito and Sónia Santos	2014
3411	FieldObservation	https://creativecommons.org/licenses/by/4.0/legalcode	UAc	0a80feca-b411-428a-a34e-c5c2fa07cdba	Birds from Praia da Vitória marshes (Terceira, Azores, Portugal)	ObservedSpecimen	Palearctic	Portugal	Azores	Terceira	Praia da Vitória	Paul da Praia da Vitória	38°44'5.915"N, 27°3'36.131"W	38.735	-27.06	WGS84	6	10	2014.3.27	2014	LIFECWR TEAM	4	Animalia	Chordata	Aves	Anseriformes	Anatidae	Anas	americana		Anas americana	Gmelin, 1789	Anas americana Gmelin, 1789	species	Sofia Goulart, Mariana R. Brito and Sónia Santos	2014
3427	FieldObservation	https://creativecommons.org/licenses/by/4.0/legalcode	UAc	0a80feca-b411-428a-a34e-c5c2fa07cdba	Birds from Praia da Vitória marshes (Terceira, Azores, Portugal)	ObservedSpecimen	Palearctic	Portugal	Azores	Terceira	Praia da Vitória	Paul da Praia da Vitória	38°44'5.915"N, 27°3'36.131"W	38.735	-27.06	WGS84	6	10	2014.3.3	2014	LIFECWR TEAM	5	Animalia	Chordata	Aves	Anseriformes	Anatidae	Anas	americana		Anas americana	Gmelin, 1789	Anas americana Gmelin, 1789	species	Sofia Goulart, Mariana R. Brito and Sónia Santos	2014
3547	FieldObservation	https://creativecommons.org/licenses/by/4.0/legalcode	UAc	0a80feca-b411-428a-a34e-c5c2fa07cdba	Birds from Praia da Vitória marshes (Terceira, Azores, Portugal)	ObservedSpecimen	Palearctic	Portugal	Azores	Terceira	Praia da Vitória	Paul da Praia da Vitória	38°44'5.915"N, 27°3'36.131"W	38.735	-27.06	WGS84	6	10	2014.4.4	2014	LIFECWR TEAM	2	Animalia	Chordata	Aves	Anseriformes	Anatidae	Anas	americana		Anas americana	Gmelin, 1789	Anas americana Gmelin, 1789	species	Sofia Goulart, Mariana R. Brito and Sónia Santos	2014
4594	FieldObservation	https://creativecommons.org/licenses/by/4.0/legalcode	UAc	0a80feca-b411-428a-a34e-c5c2fa07cdba	Birds from Praia da Vitória marshes (Terceira, Azores, Portugal)	ObservedSpecimen	Palearctic	Portugal	Azores	Terceira	Praia da Vitória	Paul da Praia da Vitória	38°44'5.915"N, 27°3'36.131"W	38.735	-27.06	WGS84	6	10	2015.1.13	2015	LIFECWR TEAM	9	Animalia	Chordata	Aves	Anseriformes	Anatidae	Anas	americana		Anas americana	Gmelin, 1789	Anas americana Gmelin, 1789	species	Sofia Goulart, Mariana R. Brito and Sónia Santos	2015
4613	FieldObservation	https://creativecommons.org/licenses/by/4.0/legalcode	UAc	0a80feca-b411-428a-a34e-c5c2fa07cdba	Birds from Praia da Vitória marshes (Terceira, Azores, Portugal)	ObservedSpecimen	Palearctic	Portugal	Azores	Terceira	Praia da Vitória	Paul da Praia da Vitória	38°44'5.915"N, 27°3'36.131"W	38.735	-27.06	WGS84	6	10	2015.1.14	2015	LIFECWR TEAM	16	Animalia	Chordata	Aves	Anseriformes	Anatidae	Anas	americana		Anas americana	Gmelin, 1789	Anas americana Gmelin, 1789	species	Sofia Goulart, Mariana R. Brito and Sónia Santos	2015
4632	FieldObservation	https://creativecommons.org/licenses/by/4.0/legalcode	UAc	0a80feca-b411-428a-a34e-c5c2fa07cdba	Birds from Praia da Vitória marshes (Terceira, Azores, Portugal)	ObservedSpecimen	Palearctic	Portugal	Azores	Terceira	Praia da Vitória	Paul da Praia da Vitória	38°44'5.915"N, 27°3'36.131"W	38.735	-27.06	WGS84	6	10	2015.1.15	2015	LIFECWR TEAM	17	Animalia	Chordata	Aves	Anseriformes	Anatidae	Anas	americana		Anas americana	Gmelin, 1789	Anas americana Gmelin, 1789	species	Sofia Goulart, Mariana R. Brito and Sónia Santos	2015
4651	FieldObservation	https://creativecommons.org/licenses/by/4.0/legalcode	UAc	0a80feca-b411-428a-a34e-c5c2fa07cdba	Birds from Praia da Vitória marshes (Terceira, Azores, Portugal)	ObservedSpecimen	Palearctic	Portugal	Azores	Terceira	Praia da Vitória	Paul da Praia da Vitória	38°44'5.915"N, 27°3'36.131"W	38.735	-27.06	WGS84	6	10	2015.1.16	2015	LIFECWR TEAM	8	Animalia	Chordata	Aves	Anseriformes	Anatidae	Anas	americana		Anas americana	Gmelin, 1789	Anas americana Gmelin, 1789	species	Sofia Goulart, Mariana R. Brito and Sónia Santos	2015
4677	FieldObservation	https://creativecommons.org/licenses/by/4.0/legalcode	UAc	0a80feca-b411-428a-a34e-c5c2fa07cdba	Birds from Praia da Vitória marshes (Terceira, Azores, Portugal)	ObservedSpecimen	Palearctic	Portugal	Azores	Terceira	Praia da Vitória	Paul da Praia da Vitória	38°44'5.915"N, 27°3'36.131"W	38.735	-27.06	WGS84	6	10	2015.1.19	2015	LIFECWR TEAM	14	Animalia	Chordata	Aves	Anseriformes	Anatidae	Anas	americana		Anas americana	Gmelin, 1789	Anas americana Gmelin, 1789	species	Sofia Goulart, Mariana R. Brito and Sónia Santos	2015
4700	FieldObservation	https://creativecommons.org/licenses/by/4.0/legalcode	UAc	0a80feca-b411-428a-a34e-c5c2fa07cdba	Birds from Praia da Vitória marshes (Terceira, Azores, Portugal)	ObservedSpecimen	Palearctic	Portugal	Azores	Terceira	Praia da Vitória	Paul da Praia da Vitória	38°44'5.915"N, 27°3'36.131"W	38.735	-27.06	WGS84	6	10	2015.1.2	2015	LIFECWR TEAM	7	Animalia	Chordata	Aves	Anseriformes	Anatidae	Anas	americana		Anas americana	Gmelin, 1789	Anas americana Gmelin, 1789	species	Sofia Goulart, Mariana R. Brito and Sónia Santos	2015
4708	FieldObservation	https://creativecommons.org/licenses/by/4.0/legalcode	UAc	0a80feca-b411-428a-a34e-c5c2fa07cdba	Birds from Praia da Vitória marshes (Terceira, Azores, Portugal)	ObservedSpecimen	Palearctic	Portugal	Azores	Terceira	Praia da Vitória	Paul da Praia da Vitória	38°44'5.915"N, 27°3'36.131"W	38.735	-27.06	WGS84	6	10	2015.1.20	2015	LIFECWR TEAM	8	Animalia	Chordata	Aves	Anseriformes	Anatidae	Anas	americana		Anas americana	Gmelin, 1789	Anas americana Gmelin, 1789	species	Sofia Goulart, Mariana R. Brito and Sónia Santos	2015
4731	FieldObservation	https://creativecommons.org/licenses/by/4.0/legalcode	UAc	0a80feca-b411-428a-a34e-c5c2fa07cdba	Birds from Praia da Vitória marshes (Terceira, Azores, Portugal)	ObservedSpecimen	Palearctic	Portugal	Azores	Terceira	Praia da Vitória	Paul da Praia da Vitória	38°44'5.915"N, 27°3'36.131"W	38.735	-27.06	WGS84	6	10	2015.1.21	2015	LIFECWR TEAM	11	Animalia	Chordata	Aves	Anseriformes	Anatidae	Anas	americana		Anas americana	Gmelin, 1789	Anas americana Gmelin, 1789	species	Sofia Goulart, Mariana R. Brito and Sónia Santos	2015
4745	FieldObservation	https://creativecommons.org/licenses/by/4.0/legalcode	UAc	0a80feca-b411-428a-a34e-c5c2fa07cdba	Birds from Praia da Vitória marshes (Terceira, Azores, Portugal)	ObservedSpecimen	Palearctic	Portugal	Azores	Terceira	Praia da Vitória	Paul da Praia da Vitória	38°44'5.915"N, 27°3'36.131"W	38.735	-27.06	WGS84	6	10	2015.1.22	2015	LIFECWR TEAM	10	Animalia	Chordata	Aves	Anseriformes	Anatidae	Anas	americana		Anas americana	Gmelin, 1789	Anas americana Gmelin, 1789	species	Sofia Goulart, Mariana R. Brito and Sónia Santos	2015
4771	FieldObservation	https://creativecommons.org/licenses/by/4.0/legalcode	UAc	0a80feca-b411-428a-a34e-c5c2fa07cdba	Birds from Praia da Vitória marshes (Terceira, Azores, Portugal)	ObservedSpecimen	Palearctic	Portugal	Azores	Terceira	Praia da Vitória	Paul da Praia da Vitória	38°44'5.915"N, 27°3'36.131"W	38.735	-27.06	WGS84	6	10	2015.1.23	2015	LIFECWR TEAM	16	Animalia	Chordata	Aves	Anseriformes	Anatidae	Anas	americana		Anas americana	Gmelin, 1789	Anas americana Gmelin, 1789	species	Sofia Goulart, Mariana R. Brito and Sónia Santos	2015
4798	FieldObservation	https://creativecommons.org/licenses/by/4.0/legalcode	UAc	0a80feca-b411-428a-a34e-c5c2fa07cdba	Birds from Praia da Vitória marshes (Terceira, Azores, Portugal)	ObservedSpecimen	Palearctic	Portugal	Azores	Terceira	Praia da Vitória	Paul da Praia da Vitória	38°44'5.915"N, 27°3'36.131"W	38.735	-27.06	WGS84	6	10	2015.1.26	2015	LIFECWR TEAM	16	Animalia	Chordata	Aves	Anseriformes	Anatidae	Anas	americana		Anas americana	Gmelin, 1789	Anas americana Gmelin, 1789	species	Sofia Goulart, Mariana R. Brito and Sónia Santos	2015
4820	FieldObservation	https://creativecommons.org/licenses/by/4.0/legalcode	UAc	0a80feca-b411-428a-a34e-c5c2fa07cdba	Birds from Praia da Vitória marshes (Terceira, Azores, Portugal)	ObservedSpecimen	Palearctic	Portugal	Azores	Terceira	Praia da Vitória	Paul da Praia da Vitória	38°44'5.915"N, 27°3'36.131"W	38.735	-27.06	WGS84	6	10	2015.1.27	2015	LIFECWR TEAM	13	Animalia	Chordata	Aves	Anseriformes	Anatidae	Anas	americana		Anas americana	Gmelin, 1789	Anas americana Gmelin, 1789	species	Sofia Goulart, Mariana R. Brito and Sónia Santos	2015
4841	FieldObservation	https://creativecommons.org/licenses/by/4.0/legalcode	UAc	0a80feca-b411-428a-a34e-c5c2fa07cdba	Birds from Praia da Vitória marshes (Terceira, Azores, Portugal)	ObservedSpecimen	Palearctic	Portugal	Azores	Terceira	Praia da Vitória	Paul da Praia da Vitória	38°44'5.915"N, 27°3'36.131"W	38.735	-27.06	WGS84	6	10	2015.1.28	2015	LIFECWR TEAM	5	Animalia	Chordata	Aves	Anseriformes	Anatidae	Anas	americana		Anas americana	Gmelin, 1789	Anas americana Gmelin, 1789	species	Sofia Goulart, Mariana R. Brito and Sónia Santos	2015
4856	FieldObservation	https://creativecommons.org/licenses/by/4.0/legalcode	UAc	0a80feca-b411-428a-a34e-c5c2fa07cdba	Birds from Praia da Vitória marshes (Terceira, Azores, Portugal)	ObservedSpecimen	Palearctic	Portugal	Azores	Terceira	Praia da Vitória	Paul da Praia da Vitória	38°44'5.915"N, 27°3'36.131"W	38.735	-27.06	WGS84	6	10	2015.1.29	2015	LIFECWR TEAM	7	Animalia	Chordata	Aves	Anseriformes	Anatidae	Anas	americana		Anas americana	Gmelin, 1789	Anas americana Gmelin, 1789	species	Sofia Goulart, Mariana R. Brito and Sónia Santos	2015
4883	FieldObservation	https://creativecommons.org/licenses/by/4.0/legalcode	UAc	0a80feca-b411-428a-a34e-c5c2fa07cdba	Birds from Praia da Vitória marshes (Terceira, Azores, Portugal)	ObservedSpecimen	Palearctic	Portugal	Azores	Terceira	Praia da Vitória	Paul da Praia da Vitória	38°44'5.915"N, 27°3'36.131"W	38.735	-27.06	WGS84	6	10	2015.1.6	2015	LIFECWR TEAM	8	Animalia	Chordata	Aves	Anseriformes	Anatidae	Anas	americana		Anas americana	Gmelin, 1789	Anas americana Gmelin, 1789	species	Sofia Goulart, Mariana R. Brito and Sónia Santos	2015
4910	FieldObservation	https://creativecommons.org/licenses/by/4.0/legalcode	UAc	0a80feca-b411-428a-a34e-c5c2fa07cdba	Birds from Praia da Vitória marshes (Terceira, Azores, Portugal)	ObservedSpecimen	Palearctic	Portugal	Azores	Terceira	Praia da Vitória	Paul da Praia da Vitória	38°44'5.915"N, 27°3'36.131"W	38.735	-27.06	WGS84	6	10	2015.1.7	2015	LIFECWR TEAM	6	Animalia	Chordata	Aves	Anseriformes	Anatidae	Anas	americana		Anas americana	Gmelin, 1789	Anas americana Gmelin, 1789	species	Sofia Goulart, Mariana R. Brito and Sónia Santos	2015
4933	FieldObservation	https://creativecommons.org/licenses/by/4.0/legalcode	UAc	0a80feca-b411-428a-a34e-c5c2fa07cdba	Birds from Praia da Vitória marshes (Terceira, Azores, Portugal)	ObservedSpecimen	Palearctic	Portugal	Azores	Terceira	Praia da Vitória	Paul da Praia da Vitória	38°44'5.915"N, 27°3'36.131"W	38.735	-27.06	WGS84	6	10	2015.1.8	2015	LIFECWR TEAM	2	Animalia	Chordata	Aves	Anseriformes	Anatidae	Anas	americana		Anas americana	Gmelin, 1789	Anas americana Gmelin, 1789	species	Sofia Goulart, Mariana R. Brito and Sónia Santos	2015
4961	FieldObservation	https://creativecommons.org/licenses/by/4.0/legalcode	UAc	0a80feca-b411-428a-a34e-c5c2fa07cdba	Birds from Praia da Vitória marshes (Terceira, Azores, Portugal)	ObservedSpecimen	Palearctic	Portugal	Azores	Terceira	Praia da Vitória	Paul da Praia da Vitória	38°44'5.915"N, 27°3'36.131"W	38.735	-27.06	WGS84	6	10	2015.1.9	2015	LIFECWR TEAM	16	Animalia	Chordata	Aves	Anseriformes	Anatidae	Anas	americana		Anas americana	Gmelin, 1789	Anas americana Gmelin, 1789	species	Sofia Goulart, Mariana R. Brito and Sónia Santos	2015
5424	FieldObservation	https://creativecommons.org/licenses/by/4.0/legalcode	UAc	0a80feca-b411-428a-a34e-c5c2fa07cdba	Birds from Praia da Vitória marshes (Terceira, Azores, Portugal)	ObservedSpecimen	Palearctic	Portugal	Azores	Terceira	Praia da Vitória	Paul da Praia da Vitória	38°44'5.915"N, 27°3'36.131"W	38.735	-27.06	WGS84	6	10	2015.11.20	2015	LIFECWR TEAM	3	Animalia	Chordata	Aves	Anseriformes	Anatidae	Anas	americana		Anas americana	Gmelin, 1789	Anas americana Gmelin, 1789	species	Sofia Goulart, Mariana R. Brito and Sónia Santos	2015
5449	FieldObservation	https://creativecommons.org/licenses/by/4.0/legalcode	UAc	0a80feca-b411-428a-a34e-c5c2fa07cdba	Birds from Praia da Vitória marshes (Terceira, Azores, Portugal)	ObservedSpecimen	Palearctic	Portugal	Azores	Terceira	Praia da Vitória	Paul da Pedreira do Cabo da Praia	38°42'15,538"N, 27°2'47,222"W	38.7043	-27.0465	WGS84	3	10	2015.11.23	2015	LIFECWR TEAM	1	Animalia	Chordata	Aves	Anseriformes	Anatidae	Anas	americana		Anas americana	Gmelin, 1789	Anas americana Gmelin, 1789	species	Sofia Goulart, Mariana R. Brito and Sónia Santos	2015
5450	FieldObservation	https://creativecommons.org/licenses/by/4.0/legalcode	UAc	0a80feca-b411-428a-a34e-c5c2fa07cdba	Birds from Praia da Vitória marshes (Terceira, Azores, Portugal)	ObservedSpecimen	Palearctic	Portugal	Azores	Terceira	Praia da Vitória	Paul da Praia da Vitória	38°44'5.915"N, 27°3'36.131"W	38.735	-27.06	WGS84	6	10	2015.11.23	2015	LIFECWR TEAM	3	Animalia	Chordata	Aves	Anseriformes	Anatidae	Anas	americana		Anas americana	Gmelin, 1789	Anas americana Gmelin, 1789	species	Sofia Goulart, Mariana R. Brito and Sónia Santos	2015
5493	FieldObservation	https://creativecommons.org/licenses/by/4.0/legalcode	UAc	0a80feca-b411-428a-a34e-c5c2fa07cdba	Birds from Praia da Vitória marshes (Terceira, Azores, Portugal)	ObservedSpecimen	Palearctic	Portugal	Azores	Terceira	Praia da Vitória	Paul da Pedreira do Cabo da Praia	38°42'15,538"N, 27°2'47,222"W	38.7043	-27.0465	WGS84	3	10	2015.11.25	2015	LIFECWR TEAM	1	Animalia	Chordata	Aves	Anseriformes	Anatidae	Anas	americana		Anas americana	Gmelin, 1789	Anas americana Gmelin, 1789	species	Sofia Goulart, Mariana R. Brito and Sónia Santos	2015
5494	FieldObservation	https://creativecommons.org/licenses/by/4.0/legalcode	UAc	0a80feca-b411-428a-a34e-c5c2fa07cdba	Birds from Praia da Vitória marshes (Terceira, Azores, Portugal)	ObservedSpecimen	Palearctic	Portugal	Azores	Terceira	Praia da Vitória	Paul da Praia da Vitória	38°44'5.915"N, 27°3'36.131"W	38.735	-27.06	WGS84	6	10	2015.11.25	2015	LIFECWR TEAM	2	Animalia	Chordata	Aves	Anseriformes	Anatidae	Anas	americana		Anas americana	Gmelin, 1789	Anas americana Gmelin, 1789	species	Sofia Goulart, Mariana R. Brito and Sónia Santos	2015
5582	FieldObservation	https://creativecommons.org/licenses/by/4.0/legalcode	UAc	0a80feca-b411-428a-a34e-c5c2fa07cdba	Birds from Praia da Vitória marshes (Terceira, Azores, Portugal)	ObservedSpecimen	Palearctic	Portugal	Azores	Terceira	Praia da Vitória	Paul da Pedreira do Cabo da Praia	38°42'15,538"N, 27°2'47,222"W	38.7043	-27.0465	WGS84	3	10	2015.11.30	2015	LIFECWR TEAM	1	Animalia	Chordata	Aves	Anseriformes	Anatidae	Anas	americana		Anas americana	Gmelin, 1789	Anas americana Gmelin, 1789	species	Sofia Goulart, Mariana R. Brito and Sónia Santos	2015
5583	FieldObservation	https://creativecommons.org/licenses/by/4.0/legalcode	UAc	0a80feca-b411-428a-a34e-c5c2fa07cdba	Birds from Praia da Vitória marshes (Terceira, Azores, Portugal)	ObservedSpecimen	Palearctic	Portugal	Azores	Terceira	Praia da Vitória	Paul da Praia da Vitória	38°44'5.915"N, 27°3'36.131"W	38.735	-27.06	WGS84	6	10	2015.11.30	2015	LIFECWR TEAM	3	Animalia	Chordata	Aves	Anseriformes	Anatidae	Anas	americana		Anas americana	Gmelin, 1789	Anas americana Gmelin, 1789	species	Sofia Goulart, Mariana R. Brito and Sónia Santos	2015
5675	FieldObservation	https://creativecommons.org/licenses/by/4.0/legalcode	UAc	0a80feca-b411-428a-a34e-c5c2fa07cdba	Birds from Praia da Vitória marshes (Terceira, Azores, Portugal)	ObservedSpecimen	Palearctic	Portugal	Azores	Terceira	Praia da Vitória	Paul da Praia da Vitória	38°44'5.915"N, 27°3'36.131"W	38.735	-27.06	WGS84	6	10	2015.12.1	2015	LIFECWR TEAM	4	Animalia	Chordata	Aves	Anseriformes	Anatidae	Anas	americana		Anas americana	Gmelin, 1789	Anas americana Gmelin, 1789	species	Sofia Goulart, Mariana R. Brito and Sónia Santos	2015
5703	FieldObservation	https://creativecommons.org/licenses/by/4.0/legalcode	UAc	0a80feca-b411-428a-a34e-c5c2fa07cdba	Birds from Praia da Vitória marshes (Terceira, Azores, Portugal)	ObservedSpecimen	Palearctic	Portugal	Azores	Terceira	Praia da Vitória	Paul da Pedreira do Cabo da Praia	38°42'15,538"N, 27°2'47,222"W	38.7043	-27.0465	WGS84	3	10	2015.12.10	2015	LIFECWR TEAM	1	Animalia	Chordata	Aves	Anseriformes	Anatidae	Anas	americana		Anas americana	Gmelin, 1789	Anas americana Gmelin, 1789	species	Sofia Goulart, Mariana R. Brito and Sónia Santos	2015
5704	FieldObservation	https://creativecommons.org/licenses/by/4.0/legalcode	UAc	0a80feca-b411-428a-a34e-c5c2fa07cdba	Birds from Praia da Vitória marshes (Terceira, Azores, Portugal)	ObservedSpecimen	Palearctic	Portugal	Azores	Terceira	Praia da Vitória	Paul da Praia da Vitória	38°44'5.915"N, 27°3'36.131"W	38.735	-27.06	WGS84	6	10	2015.12.10	2015	LIFECWR TEAM	4	Animalia	Chordata	Aves	Anseriformes	Anatidae	Anas	americana		Anas americana	Gmelin, 1789	Anas americana Gmelin, 1789	species	Sofia Goulart, Mariana R. Brito and Sónia Santos	2015
5737	FieldObservation	https://creativecommons.org/licenses/by/4.0/legalcode	UAc	0a80feca-b411-428a-a34e-c5c2fa07cdba	Birds from Praia da Vitória marshes (Terceira, Azores, Portugal)	ObservedSpecimen	Palearctic	Portugal	Azores	Terceira	Praia da Vitória	Paul da Praia da Vitória	38°44'5.915"N, 27°3'36.131"W	38.735	-27.06	WGS84	6	10	2015.12.11	2015	LIFECWR TEAM	4	Animalia	Chordata	Aves	Anseriformes	Anatidae	Anas	americana		Anas americana	Gmelin, 1789	Anas americana Gmelin, 1789	species	Sofia Goulart, Mariana R. Brito and Sónia Santos	2015
5749	FieldObservation	https://creativecommons.org/licenses/by/4.0/legalcode	UAc	0a80feca-b411-428a-a34e-c5c2fa07cdba	Birds from Praia da Vitória marshes (Terceira, Azores, Portugal)	ObservedSpecimen	Palearctic	Portugal	Azores	Terceira	Praia da Vitória	Paul da Praia da Vitória	38°44'5.915"N, 27°3'36.131"W	38.735	-27.06	WGS84	6	10	2015.12.14	2015	LIFECWR TEAM	4	Animalia	Chordata	Aves	Anseriformes	Anatidae	Anas	americana		Anas americana	Gmelin, 1789	Anas americana Gmelin, 1789	species	Sofia Goulart, Mariana R. Brito and Sónia Santos	2015
5766	FieldObservation	https://creativecommons.org/licenses/by/4.0/legalcode	UAc	0a80feca-b411-428a-a34e-c5c2fa07cdba	Birds from Praia da Vitória marshes (Terceira, Azores, Portugal)	ObservedSpecimen	Palearctic	Portugal	Azores	Terceira	Praia da Vitória	Paul da Praia da Vitória	38°44'5.915"N, 27°3'36.131"W	38.735	-27.06	WGS84	6	10	2015.12.16	2015	LIFECWR TEAM	4	Animalia	Chordata	Aves	Anseriformes	Anatidae	Anas	americana		Anas americana	Gmelin, 1789	Anas americana Gmelin, 1789	species	Sofia Goulart, Mariana R. Brito and Sónia Santos	2015
5793	FieldObservation	https://creativecommons.org/licenses/by/4.0/legalcode	UAc	0a80feca-b411-428a-a34e-c5c2fa07cdba	Birds from Praia da Vitória marshes (Terceira, Azores, Portugal)	ObservedSpecimen	Palearctic	Portugal	Azores	Terceira	Praia da Vitória	Paul da Praia da Vitória	38°44'5.915"N, 27°3'36.131"W	38.735	-27.06	WGS84	6	10	2015.12.17	2015	LIFECWR TEAM	4	Animalia	Chordata	Aves	Anseriformes	Anatidae	Anas	americana		Anas americana	Gmelin, 1789	Anas americana Gmelin, 1789	species	Sofia Goulart, Mariana R. Brito and Sónia Santos	2015
5809	FieldObservation	https://creativecommons.org/licenses/by/4.0/legalcode	UAc	0a80feca-b411-428a-a34e-c5c2fa07cdba	Birds from Praia da Vitória marshes (Terceira, Azores, Portugal)	ObservedSpecimen	Palearctic	Portugal	Azores	Terceira	Praia da Vitória	Paul da Pedreira do Cabo da Praia	38°42'15,538"N, 27°2'47,222"W	38.7043	-27.0465	WGS84	3	10	2015.12.2	2015	LIFECWR TEAM	1	Animalia	Chordata	Aves	Anseriformes	Anatidae	Anas	americana		Anas americana	Gmelin, 1789	Anas americana Gmelin, 1789	species	Sofia Goulart, Mariana R. Brito and Sónia Santos	2015
5810	FieldObservation	https://creativecommons.org/licenses/by/4.0/legalcode	UAc	0a80feca-b411-428a-a34e-c5c2fa07cdba	Birds from Praia da Vitória marshes (Terceira, Azores, Portugal)	ObservedSpecimen	Palearctic	Portugal	Azores	Terceira	Praia da Vitória	Paul da Praia da Vitória	38°44'5.915"N, 27°3'36.131"W	38.735	-27.06	WGS84	6	10	2015.12.2	2015	LIFECWR TEAM	3	Animalia	Chordata	Aves	Anseriformes	Anatidae	Anas	americana		Anas americana	Gmelin, 1789	Anas americana Gmelin, 1789	species	Sofia Goulart, Mariana R. Brito and Sónia Santos	2015
5837	FieldObservation	https://creativecommons.org/licenses/by/4.0/legalcode	UAc	0a80feca-b411-428a-a34e-c5c2fa07cdba	Birds from Praia da Vitória marshes (Terceira, Azores, Portugal)	ObservedSpecimen	Palearctic	Portugal	Azores	Terceira	Praia da Vitória	Paul da Praia da Vitória	38°44'5.915"N, 27°3'36.131"W	38.735	-27.06	WGS84	6	10	2015.12.21	2015	LIFECWR TEAM	4	Animalia	Chordata	Aves	Anseriformes	Anatidae	Anas	americana		Anas americana	Gmelin, 1789	Anas americana Gmelin, 1789	species	Sofia Goulart, Mariana R. Brito and Sónia Santos	2015
5850	FieldObservation	https://creativecommons.org/licenses/by/4.0/legalcode	UAc	0a80feca-b411-428a-a34e-c5c2fa07cdba	Birds from Praia da Vitória marshes (Terceira, Azores, Portugal)	ObservedSpecimen	Palearctic	Portugal	Azores	Terceira	Praia da Vitória	Paul da Pedreira do Cabo da Praia	38°42'15,538"N, 27°2'47,222"W	38.7043	-27.0465	WGS84	3	10	2015.12.22	2015	LIFECWR TEAM	1	Animalia	Chordata	Aves	Anseriformes	Anatidae	Anas	americana		Anas americana	Gmelin, 1789	Anas americana Gmelin, 1789	species	Sofia Goulart, Mariana R. Brito and Sónia Santos	2015
5851	FieldObservation	https://creativecommons.org/licenses/by/4.0/legalcode	UAc	0a80feca-b411-428a-a34e-c5c2fa07cdba	Birds from Praia da Vitória marshes (Terceira, Azores, Portugal)	ObservedSpecimen	Palearctic	Portugal	Azores	Terceira	Praia da Vitória	Paul da Praia da Vitória	38°44'5.915"N, 27°3'36.131"W	38.735	-27.06	WGS84	6	10	2015.12.22	2015	LIFECWR TEAM	4	Animalia	Chordata	Aves	Anseriformes	Anatidae	Anas	americana		Anas americana	Gmelin, 1789	Anas americana Gmelin, 1789	species	Sofia Goulart, Mariana R. Brito and Sónia Santos	2015
5878	FieldObservation	https://creativecommons.org/licenses/by/4.0/legalcode	UAc	0a80feca-b411-428a-a34e-c5c2fa07cdba	Birds from Praia da Vitória marshes (Terceira, Azores, Portugal)	ObservedSpecimen	Palearctic	Portugal	Azores	Terceira	Praia da Vitória	Paul da Praia da Vitória	38°44'5.915"N, 27°3'36.131"W	38.735	-27.06	WGS84	6	10	2015.12.28	2015	LIFECWR TEAM	2	Animalia	Chordata	Aves	Anseriformes	Anatidae	Anas	americana		Anas americana	Gmelin, 1789	Anas americana Gmelin, 1789	species	Sofia Goulart, Mariana R. Brito and Sónia Santos	2015
5925	FieldObservation	https://creativecommons.org/licenses/by/4.0/legalcode	UAc	0a80feca-b411-428a-a34e-c5c2fa07cdba	Birds from Praia da Vitória marshes (Terceira, Azores, Portugal)	ObservedSpecimen	Palearctic	Portugal	Azores	Terceira	Praia da Vitória	Paul da Pedreira do Cabo da Praia	38°42'15,538"N, 27°2'47,222"W	38.7043	-27.0465	WGS84	3	10	2015.12.3	2015	LIFECWR TEAM	1	Animalia	Chordata	Aves	Anseriformes	Anatidae	Anas	americana		Anas americana	Gmelin, 1789	Anas americana Gmelin, 1789	species	Sofia Goulart, Mariana R. Brito and Sónia Santos	2015
5926	FieldObservation	https://creativecommons.org/licenses/by/4.0/legalcode	UAc	0a80feca-b411-428a-a34e-c5c2fa07cdba	Birds from Praia da Vitória marshes (Terceira, Azores, Portugal)	ObservedSpecimen	Palearctic	Portugal	Azores	Terceira	Praia da Vitória	Paul da Praia da Vitória	38°44'5.915"N, 27°3'36.131"W	38.735	-27.06	WGS84	6	10	2015.12.3	2015	LIFECWR TEAM	4	Animalia	Chordata	Aves	Anseriformes	Anatidae	Anas	americana		Anas americana	Gmelin, 1789	Anas americana Gmelin, 1789	species	Sofia Goulart, Mariana R. Brito and Sónia Santos	2015
5955	FieldObservation	https://creativecommons.org/licenses/by/4.0/legalcode	UAc	0a80feca-b411-428a-a34e-c5c2fa07cdba	Birds from Praia da Vitória marshes (Terceira, Azores, Portugal)	ObservedSpecimen	Palearctic	Portugal	Azores	Terceira	Praia da Vitória	Paul da Pedreira do Cabo da Praia	38°42'15,538"N, 27°2'47,222"W	38.7043	-27.0465	WGS84	3	10	2015.12.30	2015	LIFECWR TEAM	1	Animalia	Chordata	Aves	Anseriformes	Anatidae	Anas	americana		Anas americana	Gmelin, 1789	Anas americana Gmelin, 1789	species	Sofia Goulart, Mariana R. Brito and Sónia Santos	2015
5956	FieldObservation	https://creativecommons.org/licenses/by/4.0/legalcode	UAc	0a80feca-b411-428a-a34e-c5c2fa07cdba	Birds from Praia da Vitória marshes (Terceira, Azores, Portugal)	ObservedSpecimen	Palearctic	Portugal	Azores	Terceira	Praia da Vitória	Paul da Praia da Vitória	38°44'5.915"N, 27°3'36.131"W	38.735	-27.06	WGS84	6	10	2015.12.30	2015	LIFECWR TEAM	3	Animalia	Chordata	Aves	Anseriformes	Anatidae	Anas	americana		Anas americana	Gmelin, 1789	Anas americana Gmelin, 1789	species	Sofia Goulart, Mariana R. Brito and Sónia Santos	2015
5982	FieldObservation	https://creativecommons.org/licenses/by/4.0/legalcode	UAc	0a80feca-b411-428a-a34e-c5c2fa07cdba	Birds from Praia da Vitória marshes (Terceira, Azores, Portugal)	ObservedSpecimen	Palearctic	Portugal	Azores	Terceira	Praia da Vitória	Paul da Praia da Vitória	38°44'5.915"N, 27°3'36.131"W	38.735	-27.06	WGS84	6	10	2015.12.4	2015	LIFECWR TEAM	3	Animalia	Chordata	Aves	Anseriformes	Anatidae	Anas	americana		Anas americana	Gmelin, 1789	Anas americana Gmelin, 1789	species	Sofia Goulart, Mariana R. Brito and Sónia Santos	2015
6011	FieldObservation	https://creativecommons.org/licenses/by/4.0/legalcode	UAc	0a80feca-b411-428a-a34e-c5c2fa07cdba	Birds from Praia da Vitória marshes (Terceira, Azores, Portugal)	ObservedSpecimen	Palearctic	Portugal	Azores	Terceira	Praia da Vitória	Paul da Praia da Vitória	38°44'5.915"N, 27°3'36.131"W	38.735	-27.06	WGS84	6	10	2015.12.7	2015	LIFECWR TEAM	4	Animalia	Chordata	Aves	Anseriformes	Anatidae	Anas	americana		Anas americana	Gmelin, 1789	Anas americana Gmelin, 1789	species	Sofia Goulart, Mariana R. Brito and Sónia Santos	2015
6044	FieldObservation	https://creativecommons.org/licenses/by/4.0/legalcode	UAc	0a80feca-b411-428a-a34e-c5c2fa07cdba	Birds from Praia da Vitória marshes (Terceira, Azores, Portugal)	ObservedSpecimen	Palearctic	Portugal	Azores	Terceira	Praia da Vitória	Paul da Praia da Vitória	38°44'5.915"N, 27°3'36.131"W	38.735	-27.06	WGS84	6	10	2015.12.9	2015	LIFECWR TEAM	3	Animalia	Chordata	Aves	Anseriformes	Anatidae	Anas	americana		Anas americana	Gmelin, 1789	Anas americana Gmelin, 1789	species	Sofia Goulart, Mariana R. Brito and Sónia Santos	2015
6069	FieldObservation	https://creativecommons.org/licenses/by/4.0/legalcode	UAc	0a80feca-b411-428a-a34e-c5c2fa07cdba	Birds from Praia da Vitória marshes (Terceira, Azores, Portugal)	ObservedSpecimen	Palearctic	Portugal	Azores	Terceira	Praia da Vitória	Paul da Praia da Vitória	38°44'5.915"N, 27°3'36.131"W	38.735	-27.06	WGS84	6	10	2015.2.10	2015	LIFECWR TEAM	10	Animalia	Chordata	Aves	Anseriformes	Anatidae	Anas	americana		Anas americana	Gmelin, 1789	Anas americana Gmelin, 1789	species	Sofia Goulart, Mariana R. Brito and Sónia Santos	2015
6090	FieldObservation	https://creativecommons.org/licenses/by/4.0/legalcode	UAc	0a80feca-b411-428a-a34e-c5c2fa07cdba	Birds from Praia da Vitória marshes (Terceira, Azores, Portugal)	ObservedSpecimen	Palearctic	Portugal	Azores	Terceira	Praia da Vitória	Paul da Praia da Vitória	38°44'5.915"N, 27°3'36.131"W	38.735	-27.06	WGS84	6	10	2015.2.11	2015	LIFECWR TEAM	16	Animalia	Chordata	Aves	Anseriformes	Anatidae	Anas	americana		Anas americana	Gmelin, 1789	Anas americana Gmelin, 1789	species	Sofia Goulart, Mariana R. Brito and Sónia Santos	2015
6113	FieldObservation	https://creativecommons.org/licenses/by/4.0/legalcode	UAc	0a80feca-b411-428a-a34e-c5c2fa07cdba	Birds from Praia da Vitória marshes (Terceira, Azores, Portugal)	ObservedSpecimen	Palearctic	Portugal	Azores	Terceira	Praia da Vitória	Paul da Praia da Vitória	38°44'5.915"N, 27°3'36.131"W	38.735	-27.06	WGS84	6	10	2015.2.12	2015	LIFECWR TEAM	16	Animalia	Chordata	Aves	Anseriformes	Anatidae	Anas	americana		Anas americana	Gmelin, 1789	Anas americana Gmelin, 1789	species	Sofia Goulart, Mariana R. Brito and Sónia Santos	2015
6136	FieldObservation	https://creativecommons.org/licenses/by/4.0/legalcode	UAc	0a80feca-b411-428a-a34e-c5c2fa07cdba	Birds from Praia da Vitória marshes (Terceira, Azores, Portugal)	ObservedSpecimen	Palearctic	Portugal	Azores	Terceira	Praia da Vitória	Paul da Praia da Vitória	38°44'5.915"N, 27°3'36.131"W	38.735	-27.06	WGS84	6	10	2015.2.13	2015	LIFECWR TEAM	8	Animalia	Chordata	Aves	Anseriformes	Anatidae	Anas	americana		Anas americana	Gmelin, 1789	Anas americana Gmelin, 1789	species	Sofia Goulart, Mariana R. Brito and Sónia Santos	2015
6157	FieldObservation	https://creativecommons.org/licenses/by/4.0/legalcode	UAc	0a80feca-b411-428a-a34e-c5c2fa07cdba	Birds from Praia da Vitória marshes (Terceira, Azores, Portugal)	ObservedSpecimen	Palearctic	Portugal	Azores	Terceira	Praia da Vitória	Paul da Praia da Vitória	38°44'5.915"N, 27°3'36.131"W	38.735	-27.06	WGS84	6	10	2015.2.18	2015	LIFECWR TEAM	10	Animalia	Chordata	Aves	Anseriformes	Anatidae	Anas	americana		Anas americana	Gmelin, 1789	Anas americana Gmelin, 1789	species	Sofia Goulart, Mariana R. Brito and Sónia Santos	2015
6183	FieldObservation	https://creativecommons.org/licenses/by/4.0/legalcode	UAc	0a80feca-b411-428a-a34e-c5c2fa07cdba	Birds from Praia da Vitória marshes (Terceira, Azores, Portugal)	ObservedSpecimen	Palearctic	Portugal	Azores	Terceira	Praia da Vitória	Paul da Praia da Vitória	38°44'5.915"N, 27°3'36.131"W	38.735	-27.06	WGS84	6	10	2015.2.19	2015	LIFECWR TEAM	16	Animalia	Chordata	Aves	Anseriformes	Anatidae	Anas	americana		Anas americana	Gmelin, 1789	Anas americana Gmelin, 1789	species	Sofia Goulart, Mariana R. Brito and Sónia Santos	2015
6206	FieldObservation	https://creativecommons.org/licenses/by/4.0/legalcode	UAc	0a80feca-b411-428a-a34e-c5c2fa07cdba	Birds from Praia da Vitória marshes (Terceira, Azores, Portugal)	ObservedSpecimen	Palearctic	Portugal	Azores	Terceira	Praia da Vitória	Paul da Praia da Vitória	38°44'5.915"N, 27°3'36.131"W	38.735	-27.06	WGS84	6	10	2015.2.23	2015	LIFECWR TEAM	6	Animalia	Chordata	Aves	Anseriformes	Anatidae	Anas	americana		Anas americana	Gmelin, 1789	Anas americana Gmelin, 1789	species	Sofia Goulart, Mariana R. Brito and Sónia Santos	2015
6224	FieldObservation	https://creativecommons.org/licenses/by/4.0/legalcode	UAc	0a80feca-b411-428a-a34e-c5c2fa07cdba	Birds from Praia da Vitória marshes (Terceira, Azores, Portugal)	ObservedSpecimen	Palearctic	Portugal	Azores	Terceira	Praia da Vitória	Paul da Praia da Vitória	38°44'5.915"N, 27°3'36.131"W	38.735	-27.06	WGS84	6	10	2015.2.25	2015	LIFECWR TEAM	10	Animalia	Chordata	Aves	Anseriformes	Anatidae	Anas	americana		Anas americana	Gmelin, 1789	Anas americana Gmelin, 1789	species	Sofia Goulart, Mariana R. Brito and Sónia Santos	2015
6249	FieldObservation	https://creativecommons.org/licenses/by/4.0/legalcode	UAc	0a80feca-b411-428a-a34e-c5c2fa07cdba	Birds from Praia da Vitória marshes (Terceira, Azores, Portugal)	ObservedSpecimen	Palearctic	Portugal	Azores	Terceira	Praia da Vitória	Paul da Praia da Vitória	38°44'5.915"N, 27°3'36.131"W	38.735	-27.06	WGS84	6	10	2015.2.3	2015	LIFECWR TEAM	16	Animalia	Chordata	Aves	Anseriformes	Anatidae	Anas	americana		Anas americana	Gmelin, 1789	Anas americana Gmelin, 1789	species	Sofia Goulart, Mariana R. Brito and Sónia Santos	2015
6271	FieldObservation	https://creativecommons.org/licenses/by/4.0/legalcode	UAc	0a80feca-b411-428a-a34e-c5c2fa07cdba	Birds from Praia da Vitória marshes (Terceira, Azores, Portugal)	ObservedSpecimen	Palearctic	Portugal	Azores	Terceira	Praia da Vitória	Paul da Praia da Vitória	38°44'5.915"N, 27°3'36.131"W	38.735	-27.06	WGS84	6	10	2015.2.4	2015	LIFECWR TEAM	15	Animalia	Chordata	Aves	Anseriformes	Anatidae	Anas	americana		Anas americana	Gmelin, 1789	Anas americana Gmelin, 1789	species	Sofia Goulart, Mariana R. Brito and Sónia Santos	2015
6293	FieldObservation	https://creativecommons.org/licenses/by/4.0/legalcode	UAc	0a80feca-b411-428a-a34e-c5c2fa07cdba	Birds from Praia da Vitória marshes (Terceira, Azores, Portugal)	ObservedSpecimen	Palearctic	Portugal	Azores	Terceira	Praia da Vitória	Paul da Praia da Vitória	38°44'5.915"N, 27°3'36.131"W	38.735	-27.06	WGS84	6	10	2015.2.5	2015	LIFECWR TEAM	11	Animalia	Chordata	Aves	Anseriformes	Anatidae	Anas	americana		Anas americana	Gmelin, 1789	Anas americana Gmelin, 1789	species	Sofia Goulart, Mariana R. Brito and Sónia Santos	2015
6316	FieldObservation	https://creativecommons.org/licenses/by/4.0/legalcode	UAc	0a80feca-b411-428a-a34e-c5c2fa07cdba	Birds from Praia da Vitória marshes (Terceira, Azores, Portugal)	ObservedSpecimen	Palearctic	Portugal	Azores	Terceira	Praia da Vitória	Paul da Praia da Vitória	38°44'5.915"N, 27°3'36.131"W	38.735	-27.06	WGS84	6	10	2015.2.9	2015	LIFECWR TEAM	7	Animalia	Chordata	Aves	Anseriformes	Anatidae	Anas	americana		Anas americana	Gmelin, 1789	Anas americana Gmelin, 1789	species	Sofia Goulart, Mariana R. Brito and Sónia Santos	2015
6342	FieldObservation	https://creativecommons.org/licenses/by/4.0/legalcode	UAc	0a80feca-b411-428a-a34e-c5c2fa07cdba	Birds from Praia da Vitória marshes (Terceira, Azores, Portugal)	ObservedSpecimen	Palearctic	Portugal	Azores	Terceira	Praia da Vitória	Paul da Praia da Vitória	38°44'5.915"N, 27°3'36.131"W	38.735	-27.06	WGS84	6	10	2015.3.10	2015	LIFECWR TEAM	11	Animalia	Chordata	Aves	Anseriformes	Anatidae	Anas	americana		Anas americana	Gmelin, 1789	Anas americana Gmelin, 1789	species	Sofia Goulart, Mariana R. Brito and Sónia Santos	2015
6360	FieldObservation	https://creativecommons.org/licenses/by/4.0/legalcode	UAc	0a80feca-b411-428a-a34e-c5c2fa07cdba	Birds from Praia da Vitória marshes (Terceira, Azores, Portugal)	ObservedSpecimen	Palearctic	Portugal	Azores	Terceira	Praia da Vitória	Paul da Praia da Vitória	38°44'5.915"N, 27°3'36.131"W	38.735	-27.06	WGS84	6	10	2015.3.12	2015	LIFECWR TEAM	10	Animalia	Chordata	Aves	Anseriformes	Anatidae	Anas	americana		Anas americana	Gmelin, 1789	Anas americana Gmelin, 1789	species	Sofia Goulart, Mariana R. Brito and Sónia Santos	2015
6377	FieldObservation	https://creativecommons.org/licenses/by/4.0/legalcode	UAc	0a80feca-b411-428a-a34e-c5c2fa07cdba	Birds from Praia da Vitória marshes (Terceira, Azores, Portugal)	ObservedSpecimen	Palearctic	Portugal	Azores	Terceira	Praia da Vitória	Paul da Praia da Vitória	38°44'5.915"N, 27°3'36.131"W	38.735	-27.06	WGS84	6	10	2015.3.13	2015	LIFECWR TEAM	8	Animalia	Chordata	Aves	Anseriformes	Anatidae	Anas	americana		Anas americana	Gmelin, 1789	Anas americana Gmelin, 1789	species	Sofia Goulart, Mariana R. Brito and Sónia Santos	2015
6402	FieldObservation	https://creativecommons.org/licenses/by/4.0/legalcode	UAc	0a80feca-b411-428a-a34e-c5c2fa07cdba	Birds from Praia da Vitória marshes (Terceira, Azores, Portugal)	ObservedSpecimen	Palearctic	Portugal	Azores	Terceira	Praia da Vitória	Paul da Praia da Vitória	38°44'5.915"N, 27°3'36.131"W	38.735	-27.06	WGS84	6	10	2015.3.17	2015	LIFECWR TEAM	11	Animalia	Chordata	Aves	Anseriformes	Anatidae	Anas	americana		Anas americana	Gmelin, 1789	Anas americana Gmelin, 1789	species	Sofia Goulart, Mariana R. Brito and Sónia Santos	2015
6413	FieldObservation	https://creativecommons.org/licenses/by/4.0/legalcode	UAc	0a80feca-b411-428a-a34e-c5c2fa07cdba	Birds from Praia da Vitória marshes (Terceira, Azores, Portugal)	ObservedSpecimen	Palearctic	Portugal	Azores	Terceira	Praia da Vitória	Paul da Praia da Vitória	38°44'5.915"N, 27°3'36.131"W	38.735	-27.06	WGS84	6	10	2015.3.2	2015	LIFECWR TEAM	8	Animalia	Chordata	Aves	Anseriformes	Anatidae	Anas	americana		Anas americana	Gmelin, 1789	Anas americana Gmelin, 1789	species	Sofia Goulart, Mariana R. Brito and Sónia Santos	2015
6435	FieldObservation	https://creativecommons.org/licenses/by/4.0/legalcode	UAc	0a80feca-b411-428a-a34e-c5c2fa07cdba	Birds from Praia da Vitória marshes (Terceira, Azores, Portugal)	ObservedSpecimen	Palearctic	Portugal	Azores	Terceira	Praia da Vitória	Paul da Praia da Vitória	38°44'5.915"N, 27°3'36.131"W	38.735	-27.06	WGS84	6	10	2015.3.23	2015	LIFECWR TEAM	16	Animalia	Chordata	Aves	Anseriformes	Anatidae	Anas	americana		Anas americana	Gmelin, 1789	Anas americana Gmelin, 1789	species	Sofia Goulart, Mariana R. Brito and Sónia Santos	2015
6460	FieldObservation	https://creativecommons.org/licenses/by/4.0/legalcode	UAc	0a80feca-b411-428a-a34e-c5c2fa07cdba	Birds from Praia da Vitória marshes (Terceira, Azores, Portugal)	ObservedSpecimen	Palearctic	Portugal	Azores	Terceira	Praia da Vitória	Paul da Praia da Vitória	38°44'5.915"N, 27°3'36.131"W	38.735	-27.06	WGS84	6	10	2015.3.24	2015	LIFECWR TEAM	14	Animalia	Chordata	Aves	Anseriformes	Anatidae	Anas	americana		Anas americana	Gmelin, 1789	Anas americana Gmelin, 1789	species	Sofia Goulart, Mariana R. Brito and Sónia Santos	2015
6483	FieldObservation	https://creativecommons.org/licenses/by/4.0/legalcode	UAc	0a80feca-b411-428a-a34e-c5c2fa07cdba	Birds from Praia da Vitória marshes (Terceira, Azores, Portugal)	ObservedSpecimen	Palearctic	Portugal	Azores	Terceira	Praia da Vitória	Paul da Praia da Vitória	38°44'5.915"N, 27°3'36.131"W	38.735	-27.06	WGS84	6	10	2015.3.25	2015	LIFECWR TEAM	6	Animalia	Chordata	Aves	Anseriformes	Anatidae	Anas	americana		Anas americana	Gmelin, 1789	Anas americana Gmelin, 1789	species	Sofia Goulart, Mariana R. Brito and Sónia Santos	2015
6515	FieldObservation	https://creativecommons.org/licenses/by/4.0/legalcode	UAc	0a80feca-b411-428a-a34e-c5c2fa07cdba	Birds from Praia da Vitória marshes (Terceira, Azores, Portugal)	ObservedSpecimen	Palearctic	Portugal	Azores	Terceira	Praia da Vitória	Paul da Praia da Vitória	38°44'5.915"N, 27°3'36.131"W	38.735	-27.06	WGS84	6	10	2015.3.27	2015	LIFECWR TEAM	12	Animalia	Chordata	Aves	Anseriformes	Anatidae	Anas	americana		Anas americana	Gmelin, 1789	Anas americana Gmelin, 1789	species	Sofia Goulart, Mariana R. Brito and Sónia Santos	2015
6526	FieldObservation	https://creativecommons.org/licenses/by/4.0/legalcode	UAc	0a80feca-b411-428a-a34e-c5c2fa07cdba	Birds from Praia da Vitória marshes (Terceira, Azores, Portugal)	ObservedSpecimen	Palearctic	Portugal	Azores	Terceira	Praia da Vitória	Paul da Praia da Vitória	38°44'5.915"N, 27°3'36.131"W	38.735	-27.06	WGS84	6	10	2015.3.3	2015	LIFECWR TEAM	14	Animalia	Chordata	Aves	Anseriformes	Anatidae	Anas	americana		Anas americana	Gmelin, 1789	Anas americana Gmelin, 1789	species	Sofia Goulart, Mariana R. Brito and Sónia Santos	2015
6543	FieldObservation	https://creativecommons.org/licenses/by/4.0/legalcode	UAc	0a80feca-b411-428a-a34e-c5c2fa07cdba	Birds from Praia da Vitória marshes (Terceira, Azores, Portugal)	ObservedSpecimen	Palearctic	Portugal	Azores	Terceira	Praia da Vitória	Paul da Praia da Vitória	38°44'5.915"N, 27°3'36.131"W	38.735	-27.06	WGS84	6	10	2015.3.30	2015	LIFECWR TEAM	6	Animalia	Chordata	Aves	Anseriformes	Anatidae	Anas	americana		Anas americana	Gmelin, 1789	Anas americana Gmelin, 1789	species	Sofia Goulart, Mariana R. Brito and Sónia Santos	2015
6569	FieldObservation	https://creativecommons.org/licenses/by/4.0/legalcode	UAc	0a80feca-b411-428a-a34e-c5c2fa07cdba	Birds from Praia da Vitória marshes (Terceira, Azores, Portugal)	ObservedSpecimen	Palearctic	Portugal	Azores	Terceira	Praia da Vitória	Paul da Praia da Vitória	38°44'5.915"N, 27°3'36.131"W	38.735	-27.06	WGS84	6	10	2015.3.4	2015	LIFECWR TEAM	12	Animalia	Chordata	Aves	Anseriformes	Anatidae	Anas	americana		Anas americana	Gmelin, 1789	Anas americana Gmelin, 1789	species	Sofia Goulart, Mariana R. Brito and Sónia Santos	2015
6592	FieldObservation	https://creativecommons.org/licenses/by/4.0/legalcode	UAc	0a80feca-b411-428a-a34e-c5c2fa07cdba	Birds from Praia da Vitória marshes (Terceira, Azores, Portugal)	ObservedSpecimen	Palearctic	Portugal	Azores	Terceira	Praia da Vitória	Paul da Praia da Vitória	38°44'5.915"N, 27°3'36.131"W	38.735	-27.06	WGS84	6	10	2015.3.5	2015	LIFECWR TEAM	11	Animalia	Chordata	Aves	Anseriformes	Anatidae	Anas	americana		Anas americana	Gmelin, 1789	Anas americana Gmelin, 1789	species	Sofia Goulart, Mariana R. Brito and Sónia Santos	2015
6615	FieldObservation	https://creativecommons.org/licenses/by/4.0/legalcode	UAc	0a80feca-b411-428a-a34e-c5c2fa07cdba	Birds from Praia da Vitória marshes (Terceira, Azores, Portugal)	ObservedSpecimen	Palearctic	Portugal	Azores	Terceira	Praia da Vitória	Paul da Praia da Vitória	38°44'5.915"N, 27°3'36.131"W	38.735	-27.06	WGS84	6	10	2015.3.6	2015	LIFECWR TEAM	11	Animalia	Chordata	Aves	Anseriformes	Anatidae	Anas	americana		Anas americana	Gmelin, 1789	Anas americana Gmelin, 1789	species	Sofia Goulart, Mariana R. Brito and Sónia Santos	2015
6623	FieldObservation	https://creativecommons.org/licenses/by/4.0/legalcode	UAc	0a80feca-b411-428a-a34e-c5c2fa07cdba	Birds from Praia da Vitória marshes (Terceira, Azores, Portugal)	ObservedSpecimen	Palearctic	Portugal	Azores	Terceira	Praia da Vitória	Paul da Praia da Vitória	38°44'5.915"N, 27°3'36.131"W	38.735	-27.06	WGS84	6	10	2015.3.9	2015	LIFECWR TEAM	10	Animalia	Chordata	Aves	Anseriformes	Anatidae	Anas	americana		Anas americana	Gmelin, 1789	Anas americana Gmelin, 1789	species	Sofia Goulart, Mariana R. Brito and Sónia Santos	2015
6755	FieldObservation	https://creativecommons.org/licenses/by/4.0/legalcode	UAc	0a80feca-b411-428a-a34e-c5c2fa07cdba	Birds from Praia da Vitória marshes (Terceira, Azores, Portugal)	ObservedSpecimen	Palearctic	Portugal	Azores	Terceira	Praia da Vitória	Paul da Praia da Vitória	38°44'5.915"N, 27°3'36.131"W	38.735	-27.06	WGS84	6	10	2015.4.6	2015	LIFECWR TEAM	4	Animalia	Chordata	Aves	Anseriformes	Anatidae	Anas	americana		Anas americana	Gmelin, 1789	Anas americana Gmelin, 1789	species	Sofia Goulart, Mariana R. Brito and Sónia Santos	2015
6781	FieldObservation	https://creativecommons.org/licenses/by/4.0/legalcode	UAc	0a80feca-b411-428a-a34e-c5c2fa07cdba	Birds from Praia da Vitória marshes (Terceira, Azores, Portugal)	ObservedSpecimen	Palearctic	Portugal	Azores	Terceira	Praia da Vitória	Paul da Praia da Vitória	38°44'5.915"N, 27°3'36.131"W	38.735	-27.06	WGS84	6	10	2015.4.9	2015	LIFECWR TEAM	2	Animalia	Chordata	Aves	Anseriformes	Anatidae	Anas	americana		Anas americana	Gmelin, 1789	Anas americana Gmelin, 1789	species	Sofia Goulart, Mariana R. Brito and Sónia Santos	2015
7610	FieldObservation	https://creativecommons.org/licenses/by/4.0/legalcode	UAc	0a80feca-b411-428a-a34e-c5c2fa07cdba	Birds from Praia da Vitória marshes (Terceira, Azores, Portugal)	ObservedSpecimen	Palearctic	Portugal	Azores	Terceira	Praia da Vitória	Paul da Praia da Vitória	38°44'5.915"N, 27°3'36.131"W	38.735	-27.06	WGS84	6	10	2016.1.11	2016	LIFECWR TEAM	3	Animalia	Chordata	Aves	Anseriformes	Anatidae	Anas	americana		Anas americana	Gmelin, 1789	Anas americana Gmelin, 1789	species	Sofia Goulart, Mariana R. Brito and Sónia Santos	2016
7644	FieldObservation	https://creativecommons.org/licenses/by/4.0/legalcode	UAc	0a80feca-b411-428a-a34e-c5c2fa07cdba	Birds from Praia da Vitória marshes (Terceira, Azores, Portugal)	ObservedSpecimen	Palearctic	Portugal	Azores	Terceira	Praia da Vitória	Paul da Praia da Vitória	38°44'5.915"N, 27°3'36.131"W	38.735	-27.06	WGS84	6	10	2016.1.13	2016	LIFECWR TEAM	3	Animalia	Chordata	Aves	Anseriformes	Anatidae	Anas	americana		Anas americana	Gmelin, 1789	Anas americana Gmelin, 1789	species	Sofia Goulart, Mariana R. Brito and Sónia Santos	2016
7669	FieldObservation	https://creativecommons.org/licenses/by/4.0/legalcode	UAc	0a80feca-b411-428a-a34e-c5c2fa07cdba	Birds from Praia da Vitória marshes (Terceira, Azores, Portugal)	ObservedSpecimen	Palearctic	Portugal	Azores	Terceira	Praia da Vitória	Paul da Praia da Vitória	38°44'5.915"N, 27°3'36.131"W	38.735	-27.06	WGS84	6	10	2016.1.14	2016	LIFECWR TEAM	1	Animalia	Chordata	Aves	Anseriformes	Anatidae	Anas	americana		Anas americana	Gmelin, 1789	Anas americana Gmelin, 1789	species	Sofia Goulart, Mariana R. Brito and Sónia Santos	2016
7694	FieldObservation	https://creativecommons.org/licenses/by/4.0/legalcode	UAc	0a80feca-b411-428a-a34e-c5c2fa07cdba	Birds from Praia da Vitória marshes (Terceira, Azores, Portugal)	ObservedSpecimen	Palearctic	Portugal	Azores	Terceira	Praia da Vitória	Paul da Praia da Vitória	38°44'5.915"N, 27°3'36.131"W	38.735	-27.06	WGS84	6	10	2016.1.18	2016	LIFECWR TEAM	3	Animalia	Chordata	Aves	Anseriformes	Anatidae	Anas	americana		Anas americana	Gmelin, 1789	Anas americana Gmelin, 1789	species	Sofia Goulart, Mariana R. Brito and Sónia Santos	2016
7717	FieldObservation	https://creativecommons.org/licenses/by/4.0/legalcode	UAc	0a80feca-b411-428a-a34e-c5c2fa07cdba	Birds from Praia da Vitória marshes (Terceira, Azores, Portugal)	ObservedSpecimen	Palearctic	Portugal	Azores	Terceira	Praia da Vitória	Paul da Praia da Vitória	38°44'5.915"N, 27°3'36.131"W	38.735	-27.06	WGS84	6	10	2016.1.19	2016	LIFECWR TEAM	3	Animalia	Chordata	Aves	Anseriformes	Anatidae	Anas	americana		Anas americana	Gmelin, 1789	Anas americana Gmelin, 1789	species	Sofia Goulart, Mariana R. Brito and Sónia Santos	2016
7727	FieldObservation	https://creativecommons.org/licenses/by/4.0/legalcode	UAc	0a80feca-b411-428a-a34e-c5c2fa07cdba	Birds from Praia da Vitória marshes (Terceira, Azores, Portugal)	ObservedSpecimen	Palearctic	Portugal	Azores	Terceira	Praia da Vitória	Paul da Praia da Vitória	38°44'5.915"N, 27°3'36.131"W	38.735	-27.06	WGS84	6	10	2016.1.20	2016	LIFECWR TEAM	3	Animalia	Chordata	Aves	Anseriformes	Anatidae	Anas	americana		Anas americana	Gmelin, 1789	Anas americana Gmelin, 1789	species	Sofia Goulart, Mariana R. Brito and Sónia Santos	2016
7748	FieldObservation	https://creativecommons.org/licenses/by/4.0/legalcode	UAc	0a80feca-b411-428a-a34e-c5c2fa07cdba	Birds from Praia da Vitória marshes (Terceira, Azores, Portugal)	ObservedSpecimen	Palearctic	Portugal	Azores	Terceira	Praia da Vitória	Paul da Praia da Vitória	38°44'5.915"N, 27°3'36.131"W	38.735	-27.06	WGS84	6	10	2016.1.21	2016	LIFECWR TEAM	3	Animalia	Chordata	Aves	Anseriformes	Anatidae	Anas	americana		Anas americana	Gmelin, 1789	Anas americana Gmelin, 1789	species	Sofia Goulart, Mariana R. Brito and Sónia Santos	2016
7757	FieldObservation	https://creativecommons.org/licenses/by/4.0/legalcode	UAc	0a80feca-b411-428a-a34e-c5c2fa07cdba	Birds from Praia da Vitória marshes (Terceira, Azores, Portugal)	ObservedSpecimen	Palearctic	Portugal	Azores	Terceira	Praia da Vitória	Paul da Praia da Vitória	38°44'5.915"N, 27°3'36.131"W	38.735	-27.06	WGS84	6	10	2016.1.22	2016	LIFECWR TEAM	3	Animalia	Chordata	Aves	Anseriformes	Anatidae	Anas	americana		Anas americana	Gmelin, 1789	Anas americana Gmelin, 1789	species	Sofia Goulart, Mariana R. Brito and Sónia Santos	2016
7785	FieldObservation	https://creativecommons.org/licenses/by/4.0/legalcode	UAc	0a80feca-b411-428a-a34e-c5c2fa07cdba	Birds from Praia da Vitória marshes (Terceira, Azores, Portugal)	ObservedSpecimen	Palearctic	Portugal	Azores	Terceira	Praia da Vitória	Paul da Praia da Vitória	38°44'5.915"N, 27°3'36.131"W	38.735	-27.06	WGS84	6	10	2016.1.25	2016	LIFECWR TEAM	3	Animalia	Chordata	Aves	Anseriformes	Anatidae	Anas	americana		Anas americana	Gmelin, 1789	Anas americana Gmelin, 1789	species	Sofia Goulart, Mariana R. Brito and Sónia Santos	2016
7799	FieldObservation	https://creativecommons.org/licenses/by/4.0/legalcode	UAc	0a80feca-b411-428a-a34e-c5c2fa07cdba	Birds from Praia da Vitória marshes (Terceira, Azores, Portugal)	ObservedSpecimen	Palearctic	Portugal	Azores	Terceira	Praia da Vitória	Paul da Praia da Vitória	38°44'5.915"N, 27°3'36.131"W	38.735	-27.06	WGS84	6	10	2016.1.26	2016	LIFECWR TEAM	3	Animalia	Chordata	Aves	Anseriformes	Anatidae	Anas	americana		Anas americana	Gmelin, 1789	Anas americana Gmelin, 1789	species	Sofia Goulart, Mariana R. Brito and Sónia Santos	2016
7827	FieldObservation	https://creativecommons.org/licenses/by/4.0/legalcode	UAc	0a80feca-b411-428a-a34e-c5c2fa07cdba	Birds from Praia da Vitória marshes (Terceira, Azores, Portugal)	ObservedSpecimen	Palearctic	Portugal	Azores	Terceira	Praia da Vitória	Paul da Praia da Vitória	38°44'5.915"N, 27°3'36.131"W	38.735	-27.06	WGS84	6	10	2016.1.27	2016	LIFECWR TEAM	3	Animalia	Chordata	Aves	Anseriformes	Anatidae	Anas	americana		Anas americana	Gmelin, 1789	Anas americana Gmelin, 1789	species	Sofia Goulart, Mariana R. Brito and Sónia Santos	2016
7854	FieldObservation	https://creativecommons.org/licenses/by/4.0/legalcode	UAc	0a80feca-b411-428a-a34e-c5c2fa07cdba	Birds from Praia da Vitória marshes (Terceira, Azores, Portugal)	ObservedSpecimen	Palearctic	Portugal	Azores	Terceira	Praia da Vitória	Paul da Praia da Vitória	38°44'5.915"N, 27°3'36.131"W	38.735	-27.06	WGS84	6	10	2016.1.28	2016	LIFECWR TEAM	3	Animalia	Chordata	Aves	Anseriformes	Anatidae	Anas	americana		Anas americana	Gmelin, 1789	Anas americana Gmelin, 1789	species	Sofia Goulart, Mariana R. Brito and Sónia Santos	2016
7882	FieldObservation	https://creativecommons.org/licenses/by/4.0/legalcode	UAc	0a80feca-b411-428a-a34e-c5c2fa07cdba	Birds from Praia da Vitória marshes (Terceira, Azores, Portugal)	ObservedSpecimen	Palearctic	Portugal	Azores	Terceira	Praia da Vitória	Paul da Praia da Vitória	38°44'5.915"N, 27°3'36.131"W	38.735	-27.06	WGS84	6	10	2016.1.29	2016	LIFECWR TEAM	3	Animalia	Chordata	Aves	Anseriformes	Anatidae	Anas	americana		Anas americana	Gmelin, 1789	Anas americana Gmelin, 1789	species	Sofia Goulart, Mariana R. Brito and Sónia Santos	2016
7911	FieldObservation	https://creativecommons.org/licenses/by/4.0/legalcode	UAc	0a80feca-b411-428a-a34e-c5c2fa07cdba	Birds from Praia da Vitória marshes (Terceira, Azores, Portugal)	ObservedSpecimen	Palearctic	Portugal	Azores	Terceira	Praia da Vitória	Paul da Praia da Vitória	38°44'5.915"N, 27°3'36.131"W	38.735	-27.06	WGS84	6	10	2016.1.4	2016	LIFECWR TEAM	3	Animalia	Chordata	Aves	Anseriformes	Anatidae	Anas	americana		Anas americana	Gmelin, 1789	Anas americana Gmelin, 1789	species	Sofia Goulart, Mariana R. Brito and Sónia Santos	2016
7933	FieldObservation	https://creativecommons.org/licenses/by/4.0/legalcode	UAc	0a80feca-b411-428a-a34e-c5c2fa07cdba	Birds from Praia da Vitória marshes (Terceira, Azores, Portugal)	ObservedSpecimen	Palearctic	Portugal	Azores	Terceira	Praia da Vitória	Paul da Praia da Vitória	38°44'5.915"N, 27°3'36.131"W	38.735	-27.06	WGS84	6	10	2016.1.5	2016	LIFECWR TEAM	3	Animalia	Chordata	Aves	Anseriformes	Anatidae	Anas	americana		Anas americana	Gmelin, 1789	Anas americana Gmelin, 1789	species	Sofia Goulart, Mariana R. Brito and Sónia Santos	2016
7960	FieldObservation	https://creativecommons.org/licenses/by/4.0/legalcode	UAc	0a80feca-b411-428a-a34e-c5c2fa07cdba	Birds from Praia da Vitória marshes (Terceira, Azores, Portugal)	ObservedSpecimen	Palearctic	Portugal	Azores	Terceira	Praia da Vitória	Paul da Praia da Vitória	38°44'5.915"N, 27°3'36.131"W	38.735	-27.06	WGS84	6	10	2016.1.6	2016	LIFECWR TEAM	3	Animalia	Chordata	Aves	Anseriformes	Anatidae	Anas	americana		Anas americana	Gmelin, 1789	Anas americana Gmelin, 1789	species	Sofia Goulart, Mariana R. Brito and Sónia Santos	2016
7987	FieldObservation	https://creativecommons.org/licenses/by/4.0/legalcode	UAc	0a80feca-b411-428a-a34e-c5c2fa07cdba	Birds from Praia da Vitória marshes (Terceira, Azores, Portugal)	ObservedSpecimen	Palearctic	Portugal	Azores	Terceira	Praia da Vitória	Paul da Pedreira do Cabo da Praia	38°42'15,538"N, 27°2'47,222"W	38.7043	-27.0465	WGS84	3	10	2016.1.7	2016	LIFECWR TEAM	1	Animalia	Chordata	Aves	Anseriformes	Anatidae	Anas	americana		Anas americana	Gmelin, 1789	Anas americana Gmelin, 1789	species	Sofia Goulart, Mariana R. Brito and Sónia Santos	2016
7988	FieldObservation	https://creativecommons.org/licenses/by/4.0/legalcode	UAc	0a80feca-b411-428a-a34e-c5c2fa07cdba	Birds from Praia da Vitória marshes (Terceira, Azores, Portugal)	ObservedSpecimen	Palearctic	Portugal	Azores	Terceira	Praia da Vitória	Paul da Praia da Vitória	38°44'5.915"N, 27°3'36.131"W	38.735	-27.06	WGS84	6	10	2016.1.7	2016	LIFECWR TEAM	3	Animalia	Chordata	Aves	Anseriformes	Anatidae	Anas	americana		Anas americana	Gmelin, 1789	Anas americana Gmelin, 1789	species	Sofia Goulart, Mariana R. Brito and Sónia Santos	2016
8018	FieldObservation	https://creativecommons.org/licenses/by/4.0/legalcode	UAc	0a80feca-b411-428a-a34e-c5c2fa07cdba	Birds from Praia da Vitória marshes (Terceira, Azores, Portugal)	ObservedSpecimen	Palearctic	Portugal	Azores	Terceira	Praia da Vitória	Paul da Praia da Vitória	38°44'5.915"N, 27°3'36.131"W	38.735	-27.06	WGS84	6	10	2016.1.8	2016	LIFECWR TEAM	3	Animalia	Chordata	Aves	Anseriformes	Anatidae	Anas	americana		Anas americana	Gmelin, 1789	Anas americana Gmelin, 1789	species	Sofia Goulart, Mariana R. Brito and Sónia Santos	2016
8106	FieldObservation	https://creativecommons.org/licenses/by/4.0/legalcode	UAc	0a80feca-b411-428a-a34e-c5c2fa07cdba	Birds from Praia da Vitória marshes (Terceira, Azores, Portugal)	ObservedSpecimen	Palearctic	Portugal	Azores	Terceira	Praia da Vitória	Paul da Praia da Vitória	38°44'5.915"N, 27°3'36.131"W	38.735	-27.06	WGS84	6	10	2016.10.26	2016	LIFECWR TEAM	1	Animalia	Chordata	Aves	Anseriformes	Anatidae	Anas	americana		Anas americana	Gmelin, 1789	Anas americana Gmelin, 1789	species	Sofia Goulart, Mariana R. Brito and Sónia Santos	2016
8121	FieldObservation	https://creativecommons.org/licenses/by/4.0/legalcode	UAc	0a80feca-b411-428a-a34e-c5c2fa07cdba	Birds from Praia da Vitória marshes (Terceira, Azores, Portugal)	ObservedSpecimen	Palearctic	Portugal	Azores	Terceira	Praia da Vitória	Paul da Praia da Vitória	38°44'5.915"N, 27°3'36.131"W	38.735	-27.06	WGS84	6	10	2016.11.17	2016	LIFECWR TEAM	6	Animalia	Chordata	Aves	Anseriformes	Anatidae	Anas	americana		Anas americana	Gmelin, 1789	Anas americana Gmelin, 1789	species	Sofia Goulart, Mariana R. Brito and Sónia Santos	2016
8132	FieldObservation	https://creativecommons.org/licenses/by/4.0/legalcode	UAc	0a80feca-b411-428a-a34e-c5c2fa07cdba	Birds from Praia da Vitória marshes (Terceira, Azores, Portugal)	ObservedSpecimen	Palearctic	Portugal	Azores	Terceira	Praia da Vitória	Paul da Praia da Vitória	38°44'5.915"N, 27°3'36.131"W	38.735	-27.06	WGS84	6	10	2016.11.21	2016	LIFECWR TEAM	1	Animalia	Chordata	Aves	Anseriformes	Anatidae	Anas	americana		Anas americana	Gmelin, 1789	Anas americana Gmelin, 1789	species	Sofia Goulart, Mariana R. Brito and Sónia Santos	2016
8151	FieldObservation	https://creativecommons.org/licenses/by/4.0/legalcode	UAc	0a80feca-b411-428a-a34e-c5c2fa07cdba	Birds from Praia da Vitória marshes (Terceira, Azores, Portugal)	ObservedSpecimen	Palearctic	Portugal	Azores	Terceira	Praia da Vitória	Paul da Praia da Vitória	38°44'5.915"N, 27°3'36.131"W	38.735	-27.06	WGS84	6	10	2016.11.7	2016	LIFECWR TEAM	1	Animalia	Chordata	Aves	Anseriformes	Anatidae	Anas	americana		Anas americana	Gmelin, 1789	Anas americana Gmelin, 1789	species	Sofia Goulart, Mariana R. Brito and Sónia Santos	2016
8180	FieldObservation	https://creativecommons.org/licenses/by/4.0/legalcode	UAc	0a80feca-b411-428a-a34e-c5c2fa07cdba	Birds from Praia da Vitória marshes (Terceira, Azores, Portugal)	ObservedSpecimen	Palearctic	Portugal	Azores	Terceira	Praia da Vitória	Paul da Praia da Vitória	38°44'5.915"N, 27°3'36.131"W	38.735	-27.06	WGS84	6	10	2016.11.8	2016	LIFECWR TEAM	5	Animalia	Chordata	Aves	Anseriformes	Anatidae	Anas	americana		Anas americana	Gmelin, 1789	Anas americana Gmelin, 1789	species	Sofia Goulart, Mariana R. Brito and Sónia Santos	2016
8241	FieldObservation	https://creativecommons.org/licenses/by/4.0/legalcode	UAc	0a80feca-b411-428a-a34e-c5c2fa07cdba	Birds from Praia da Vitória marshes (Terceira, Azores, Portugal)	ObservedSpecimen	Palearctic	Portugal	Azores	Terceira	Praia da Vitória	Paul da Praia da Vitória	38°44'5.915"N, 27°3'36.131"W	38.735	-27.06	WGS84	6	10	2016.2.1	2016	LIFECWR TEAM	3	Animalia	Chordata	Aves	Anseriformes	Anatidae	Anas	americana		Anas americana	Gmelin, 1789	Anas americana Gmelin, 1789	species	Sofia Goulart, Mariana R. Brito and Sónia Santos	2016
8268	FieldObservation	https://creativecommons.org/licenses/by/4.0/legalcode	UAc	0a80feca-b411-428a-a34e-c5c2fa07cdba	Birds from Praia da Vitória marshes (Terceira, Azores, Portugal)	ObservedSpecimen	Palearctic	Portugal	Azores	Terceira	Praia da Vitória	Paul da Praia da Vitória	38°44'5.915"N, 27°3'36.131"W	38.735	-27.06	WGS84	6	10	2016.2.10	2016	LIFECWR TEAM	3	Animalia	Chordata	Aves	Anseriformes	Anatidae	Anas	americana		Anas americana	Gmelin, 1789	Anas americana Gmelin, 1789	species	Sofia Goulart, Mariana R. Brito and Sónia Santos	2016
8292	FieldObservation	https://creativecommons.org/licenses/by/4.0/legalcode	UAc	0a80feca-b411-428a-a34e-c5c2fa07cdba	Birds from Praia da Vitória marshes (Terceira, Azores, Portugal)	ObservedSpecimen	Palearctic	Portugal	Azores	Terceira	Praia da Vitória	Paul da Praia da Vitória	38°44'5.915"N, 27°3'36.131"W	38.735	-27.06	WGS84	6	10	2016.2.11	2016	LIFECWR TEAM	3	Animalia	Chordata	Aves	Anseriformes	Anatidae	Anas	americana		Anas americana	Gmelin, 1789	Anas americana Gmelin, 1789	species	Sofia Goulart, Mariana R. Brito and Sónia Santos	2016
8318	FieldObservation	https://creativecommons.org/licenses/by/4.0/legalcode	UAc	0a80feca-b411-428a-a34e-c5c2fa07cdba	Birds from Praia da Vitória marshes (Terceira, Azores, Portugal)	ObservedSpecimen	Palearctic	Portugal	Azores	Terceira	Praia da Vitória	Paul da Praia da Vitória	38°44'5.915"N, 27°3'36.131"W	38.735	-27.06	WGS84	6	10	2016.2.12	2016	LIFECWR TEAM	3	Animalia	Chordata	Aves	Anseriformes	Anatidae	Anas	americana		Anas americana	Gmelin, 1789	Anas americana Gmelin, 1789	species	Sofia Goulart, Mariana R. Brito and Sónia Santos	2016
8340	FieldObservation	https://creativecommons.org/licenses/by/4.0/legalcode	UAc	0a80feca-b411-428a-a34e-c5c2fa07cdba	Birds from Praia da Vitória marshes (Terceira, Azores, Portugal)	ObservedSpecimen	Palearctic	Portugal	Azores	Terceira	Praia da Vitória	Paul da Praia da Vitória	38°44'5.915"N, 27°3'36.131"W	38.735	-27.06	WGS84	6	10	2016.2.15	2016	LIFECWR TEAM	3	Animalia	Chordata	Aves	Anseriformes	Anatidae	Anas	americana		Anas americana	Gmelin, 1789	Anas americana Gmelin, 1789	species	Sofia Goulart, Mariana R. Brito and Sónia Santos	2016
8369	FieldObservation	https://creativecommons.org/licenses/by/4.0/legalcode	UAc	0a80feca-b411-428a-a34e-c5c2fa07cdba	Birds from Praia da Vitória marshes (Terceira, Azores, Portugal)	ObservedSpecimen	Palearctic	Portugal	Azores	Terceira	Praia da Vitória	Paul da Praia da Vitória	38°44'5.915"N, 27°3'36.131"W	38.735	-27.06	WGS84	6	10	2016.2.17	2016	LIFECWR TEAM	3	Animalia	Chordata	Aves	Anseriformes	Anatidae	Anas	americana		Anas americana	Gmelin, 1789	Anas americana Gmelin, 1789	species	Sofia Goulart, Mariana R. Brito and Sónia Santos	2016
8379	FieldObservation	https://creativecommons.org/licenses/by/4.0/legalcode	UAc	0a80feca-b411-428a-a34e-c5c2fa07cdba	Birds from Praia da Vitória marshes (Terceira, Azores, Portugal)	ObservedSpecimen	Palearctic	Portugal	Azores	Terceira	Praia da Vitória	Paul da Praia da Vitória	38°44'5.915"N, 27°3'36.131"W	38.735	-27.06	WGS84	6	10	2016.2.18	2016	LIFECWR TEAM	3	Animalia	Chordata	Aves	Anseriformes	Anatidae	Anas	americana		Anas americana	Gmelin, 1789	Anas americana Gmelin, 1789	species	Sofia Goulart, Mariana R. Brito and Sónia Santos	2016
8398	FieldObservation	https://creativecommons.org/licenses/by/4.0/legalcode	UAc	0a80feca-b411-428a-a34e-c5c2fa07cdba	Birds from Praia da Vitória marshes (Terceira, Azores, Portugal)	ObservedSpecimen	Palearctic	Portugal	Azores	Terceira	Praia da Vitória	Paul da Praia da Vitória	38°44'5.915"N, 27°3'36.131"W	38.735	-27.06	WGS84	6	10	2016.2.19	2016	LIFECWR TEAM	3	Animalia	Chordata	Aves	Anseriformes	Anatidae	Anas	americana		Anas americana	Gmelin, 1789	Anas americana Gmelin, 1789	species	Sofia Goulart, Mariana R. Brito and Sónia Santos	2016
8424	FieldObservation	https://creativecommons.org/licenses/by/4.0/legalcode	UAc	0a80feca-b411-428a-a34e-c5c2fa07cdba	Birds from Praia da Vitória marshes (Terceira, Azores, Portugal)	ObservedSpecimen	Palearctic	Portugal	Azores	Terceira	Praia da Vitória	Paul da Praia da Vitória	38°44'5.915"N, 27°3'36.131"W	38.735	-27.06	WGS84	6	10	2016.2.2	2016	LIFECWR TEAM	3	Animalia	Chordata	Aves	Anseriformes	Anatidae	Anas	americana		Anas americana	Gmelin, 1789	Anas americana Gmelin, 1789	species	Sofia Goulart, Mariana R. Brito and Sónia Santos	2016
8455	FieldObservation	https://creativecommons.org/licenses/by/4.0/legalcode	UAc	0a80feca-b411-428a-a34e-c5c2fa07cdba	Birds from Praia da Vitória marshes (Terceira, Azores, Portugal)	ObservedSpecimen	Palearctic	Portugal	Azores	Terceira	Praia da Vitória	Paul da Praia da Vitória	38°44'5.915"N, 27°3'36.131"W	38.735	-27.06	WGS84	6	10	2016.2.22	2016	LIFECWR TEAM	3	Animalia	Chordata	Aves	Anseriformes	Anatidae	Anas	americana		Anas americana	Gmelin, 1789	Anas americana Gmelin, 1789	species	Sofia Goulart, Mariana R. Brito and Sónia Santos	2016
8479	FieldObservation	https://creativecommons.org/licenses/by/4.0/legalcode	UAc	0a80feca-b411-428a-a34e-c5c2fa07cdba	Birds from Praia da Vitória marshes (Terceira, Azores, Portugal)	ObservedSpecimen	Palearctic	Portugal	Azores	Terceira	Praia da Vitória	Paul da Praia da Vitória	38°44'5.915"N, 27°3'36.131"W	38.735	-27.06	WGS84	6	10	2016.2.23	2016	LIFECWR TEAM	3	Animalia	Chordata	Aves	Anseriformes	Anatidae	Anas	americana		Anas americana	Gmelin, 1789	Anas americana Gmelin, 1789	species	Sofia Goulart, Mariana R. Brito and Sónia Santos	2016
8503	FieldObservation	https://creativecommons.org/licenses/by/4.0/legalcode	UAc	0a80feca-b411-428a-a34e-c5c2fa07cdba	Birds from Praia da Vitória marshes (Terceira, Azores, Portugal)	ObservedSpecimen	Palearctic	Portugal	Azores	Terceira	Praia da Vitória	Paul da Praia da Vitória	38°44'5.915"N, 27°3'36.131"W	38.735	-27.06	WGS84	6	10	2016.2.24	2016	LIFECWR TEAM	3	Animalia	Chordata	Aves	Anseriformes	Anatidae	Anas	americana		Anas americana	Gmelin, 1789	Anas americana Gmelin, 1789	species	Sofia Goulart, Mariana R. Brito and Sónia Santos	2016
8517	FieldObservation	https://creativecommons.org/licenses/by/4.0/legalcode	UAc	0a80feca-b411-428a-a34e-c5c2fa07cdba	Birds from Praia da Vitória marshes (Terceira, Azores, Portugal)	ObservedSpecimen	Palearctic	Portugal	Azores	Terceira	Praia da Vitória	Paul da Praia da Vitória	38°44'5.915"N, 27°3'36.131"W	38.735	-27.06	WGS84	6	10	2016.2.26	2016	LIFECWR TEAM	3	Animalia	Chordata	Aves	Anseriformes	Anatidae	Anas	americana		Anas americana	Gmelin, 1789	Anas americana Gmelin, 1789	species	Sofia Goulart, Mariana R. Brito and Sónia Santos	2016
8542	FieldObservation	https://creativecommons.org/licenses/by/4.0/legalcode	UAc	0a80feca-b411-428a-a34e-c5c2fa07cdba	Birds from Praia da Vitória marshes (Terceira, Azores, Portugal)	ObservedSpecimen	Palearctic	Portugal	Azores	Terceira	Praia da Vitória	Paul da Praia da Vitória	38°44'5.915"N, 27°3'36.131"W	38.735	-27.06	WGS84	6	10	2016.2.29	2016	LIFECWR TEAM	3	Animalia	Chordata	Aves	Anseriformes	Anatidae	Anas	americana		Anas americana	Gmelin, 1789	Anas americana Gmelin, 1789	species	Sofia Goulart, Mariana R. Brito and Sónia Santos	2016
8566	FieldObservation	https://creativecommons.org/licenses/by/4.0/legalcode	UAc	0a80feca-b411-428a-a34e-c5c2fa07cdba	Birds from Praia da Vitória marshes (Terceira, Azores, Portugal)	ObservedSpecimen	Palearctic	Portugal	Azores	Terceira	Praia da Vitória	Paul da Praia da Vitória	38°44'5.915"N, 27°3'36.131"W	38.735	-27.06	WGS84	6	10	2016.2.3	2016	LIFECWR TEAM	3	Animalia	Chordata	Aves	Anseriformes	Anatidae	Anas	americana		Anas americana	Gmelin, 1789	Anas americana Gmelin, 1789	species	Sofia Goulart, Mariana R. Brito and Sónia Santos	2016
8581	FieldObservation	https://creativecommons.org/licenses/by/4.0/legalcode	UAc	0a80feca-b411-428a-a34e-c5c2fa07cdba	Birds from Praia da Vitória marshes (Terceira, Azores, Portugal)	ObservedSpecimen	Palearctic	Portugal	Azores	Terceira	Praia da Vitória	Paul da Praia da Vitória	38°44'5.915"N, 27°3'36.131"W	38.735	-27.06	WGS84	6	10	2016.2.4	2016	LIFECWR TEAM	3	Animalia	Chordata	Aves	Anseriformes	Anatidae	Anas	americana		Anas americana	Gmelin, 1789	Anas americana Gmelin, 1789	species	Sofia Goulart, Mariana R. Brito and Sónia Santos	2016
8605	FieldObservation	https://creativecommons.org/licenses/by/4.0/legalcode	UAc	0a80feca-b411-428a-a34e-c5c2fa07cdba	Birds from Praia da Vitória marshes (Terceira, Azores, Portugal)	ObservedSpecimen	Palearctic	Portugal	Azores	Terceira	Praia da Vitória	Paul da Praia da Vitória	38°44'5.915"N, 27°3'36.131"W	38.735	-27.06	WGS84	6	10	2016.2.5	2016	LIFECWR TEAM	3	Animalia	Chordata	Aves	Anseriformes	Anatidae	Anas	americana		Anas americana	Gmelin, 1789	Anas americana Gmelin, 1789	species	Sofia Goulart, Mariana R. Brito and Sónia Santos	2016
8632	FieldObservation	https://creativecommons.org/licenses/by/4.0/legalcode	UAc	0a80feca-b411-428a-a34e-c5c2fa07cdba	Birds from Praia da Vitória marshes (Terceira, Azores, Portugal)	ObservedSpecimen	Palearctic	Portugal	Azores	Terceira	Praia da Vitória	Paul da Praia da Vitória	38°44'5.915"N, 27°3'36.131"W	38.735	-27.06	WGS84	6	10	2016.2.8	2016	LIFECWR TEAM	3	Animalia	Chordata	Aves	Anseriformes	Anatidae	Anas	americana		Anas americana	Gmelin, 1789	Anas americana Gmelin, 1789	species	Sofia Goulart, Mariana R. Brito and Sónia Santos	2016
8661	FieldObservation	https://creativecommons.org/licenses/by/4.0/legalcode	UAc	0a80feca-b411-428a-a34e-c5c2fa07cdba	Birds from Praia da Vitória marshes (Terceira, Azores, Portugal)	ObservedSpecimen	Palearctic	Portugal	Azores	Terceira	Praia da Vitória	Paul da Praia da Vitória	38°44'5.915"N, 27°3'36.131"W	38.735	-27.06	WGS84	6	10	2016.3.1	2016	LIFECWR TEAM	3	Animalia	Chordata	Aves	Anseriformes	Anatidae	Anas	americana		Anas americana	Gmelin, 1789	Anas americana Gmelin, 1789	species	Sofia Goulart, Mariana R. Brito and Sónia Santos	2016
8686	FieldObservation	https://creativecommons.org/licenses/by/4.0/legalcode	UAc	0a80feca-b411-428a-a34e-c5c2fa07cdba	Birds from Praia da Vitória marshes (Terceira, Azores, Portugal)	ObservedSpecimen	Palearctic	Portugal	Azores	Terceira	Praia da Vitória	Paul da Praia da Vitória	38°44'5.915"N, 27°3'36.131"W	38.735	-27.06	WGS84	6	10	2016.3.10	2016	LIFECWR TEAM	3	Animalia	Chordata	Aves	Anseriformes	Anatidae	Anas	americana		Anas americana	Gmelin, 1789	Anas americana Gmelin, 1789	species	Sofia Goulart, Mariana R. Brito and Sónia Santos	2016
8711	FieldObservation	https://creativecommons.org/licenses/by/4.0/legalcode	UAc	0a80feca-b411-428a-a34e-c5c2fa07cdba	Birds from Praia da Vitória marshes (Terceira, Azores, Portugal)	ObservedSpecimen	Palearctic	Portugal	Azores	Terceira	Praia da Vitória	Paul da Praia da Vitória	38°44'5.915"N, 27°3'36.131"W	38.735	-27.06	WGS84	6	10	2016.3.11	2016	LIFECWR TEAM	3	Animalia	Chordata	Aves	Anseriformes	Anatidae	Anas	americana		Anas americana	Gmelin, 1789	Anas americana Gmelin, 1789	species	Sofia Goulart, Mariana R. Brito and Sónia Santos	2016
8725	FieldObservation	https://creativecommons.org/licenses/by/4.0/legalcode	UAc	0a80feca-b411-428a-a34e-c5c2fa07cdba	Birds from Praia da Vitória marshes (Terceira, Azores, Portugal)	ObservedSpecimen	Palearctic	Portugal	Azores	Terceira	Praia da Vitória	Paul da Praia da Vitória	38°44'5.915"N, 27°3'36.131"W	38.735	-27.06	WGS84	6	10	2016.3.14	2016	LIFECWR TEAM	3	Animalia	Chordata	Aves	Anseriformes	Anatidae	Anas	americana		Anas americana	Gmelin, 1789	Anas americana Gmelin, 1789	species	Sofia Goulart, Mariana R. Brito and Sónia Santos	2016
8748	FieldObservation	https://creativecommons.org/licenses/by/4.0/legalcode	UAc	0a80feca-b411-428a-a34e-c5c2fa07cdba	Birds from Praia da Vitória marshes (Terceira, Azores, Portugal)	ObservedSpecimen	Palearctic	Portugal	Azores	Terceira	Praia da Vitória	Paul da Praia da Vitória	38°44'5.915"N, 27°3'36.131"W	38.735	-27.06	WGS84	6	10	2016.3.15	2016	LIFECWR TEAM	3	Animalia	Chordata	Aves	Anseriformes	Anatidae	Anas	americana		Anas americana	Gmelin, 1789	Anas americana Gmelin, 1789	species	Sofia Goulart, Mariana R. Brito and Sónia Santos	2016
8766	FieldObservation	https://creativecommons.org/licenses/by/4.0/legalcode	UAc	0a80feca-b411-428a-a34e-c5c2fa07cdba	Birds from Praia da Vitória marshes (Terceira, Azores, Portugal)	ObservedSpecimen	Palearctic	Portugal	Azores	Terceira	Praia da Vitória	Paul da Praia da Vitória	38°44'5.915"N, 27°3'36.131"W	38.735	-27.06	WGS84	6	10	2016.3.16	2016	LIFECWR TEAM	3	Animalia	Chordata	Aves	Anseriformes	Anatidae	Anas	americana		Anas americana	Gmelin, 1789	Anas americana Gmelin, 1789	species	Sofia Goulart, Mariana R. Brito and Sónia Santos	2016
8781	FieldObservation	https://creativecommons.org/licenses/by/4.0/legalcode	UAc	0a80feca-b411-428a-a34e-c5c2fa07cdba	Birds from Praia da Vitória marshes (Terceira, Azores, Portugal)	ObservedSpecimen	Palearctic	Portugal	Azores	Terceira	Praia da Vitória	Paul da Praia da Vitória	38°44'5.915"N, 27°3'36.131"W	38.735	-27.06	WGS84	6	10	2016.3.17	2016	LIFECWR TEAM	3	Animalia	Chordata	Aves	Anseriformes	Anatidae	Anas	americana		Anas americana	Gmelin, 1789	Anas americana Gmelin, 1789	species	Sofia Goulart, Mariana R. Brito and Sónia Santos	2016
8806	FieldObservation	https://creativecommons.org/licenses/by/4.0/legalcode	UAc	0a80feca-b411-428a-a34e-c5c2fa07cdba	Birds from Praia da Vitória marshes (Terceira, Azores, Portugal)	ObservedSpecimen	Palearctic	Portugal	Azores	Terceira	Praia da Vitória	Paul da Praia da Vitória	38°44'5.915"N, 27°3'36.131"W	38.735	-27.06	WGS84	6	10	2016.3.18	2016	LIFECWR TEAM	3	Animalia	Chordata	Aves	Anseriformes	Anatidae	Anas	americana		Anas americana	Gmelin, 1789	Anas americana Gmelin, 1789	species	Sofia Goulart, Mariana R. Brito and Sónia Santos	2016
8832	FieldObservation	https://creativecommons.org/licenses/by/4.0/legalcode	UAc	0a80feca-b411-428a-a34e-c5c2fa07cdba	Birds from Praia da Vitória marshes (Terceira, Azores, Portugal)	ObservedSpecimen	Palearctic	Portugal	Azores	Terceira	Praia da Vitória	Paul da Praia da Vitória	38°44'5.915"N, 27°3'36.131"W	38.735	-27.06	WGS84	6	10	2016.3.2	2016	LIFECWR TEAM	3	Animalia	Chordata	Aves	Anseriformes	Anatidae	Anas	americana		Anas americana	Gmelin, 1789	Anas americana Gmelin, 1789	species	Sofia Goulart, Mariana R. Brito and Sónia Santos	2016
8937	FieldObservation	https://creativecommons.org/licenses/by/4.0/legalcode	UAc	0a80feca-b411-428a-a34e-c5c2fa07cdba	Birds from Praia da Vitória marshes (Terceira, Azores, Portugal)	ObservedSpecimen	Palearctic	Portugal	Azores	Terceira	Praia da Vitória	Paul da Praia da Vitória	38°44'5.915"N, 27°3'36.131"W	38.735	-27.06	WGS84	6	10	2016.3.3	2016	LIFECWR TEAM	3	Animalia	Chordata	Aves	Anseriformes	Anatidae	Anas	americana		Anas americana	Gmelin, 1789	Anas americana Gmelin, 1789	species	Sofia Goulart, Mariana R. Brito and Sónia Santos	2016
9006	FieldObservation	https://creativecommons.org/licenses/by/4.0/legalcode	UAc	0a80feca-b411-428a-a34e-c5c2fa07cdba	Birds from Praia da Vitória marshes (Terceira, Azores, Portugal)	ObservedSpecimen	Palearctic	Portugal	Azores	Terceira	Praia da Vitória	Paul da Praia da Vitória	38°44'5.915"N, 27°3'36.131"W	38.735	-27.06	WGS84	6	10	2016.3.4	2016	LIFECWR TEAM	3	Animalia	Chordata	Aves	Anseriformes	Anatidae	Anas	americana		Anas americana	Gmelin, 1789	Anas americana Gmelin, 1789	species	Sofia Goulart, Mariana R. Brito and Sónia Santos	2016
9033	FieldObservation	https://creativecommons.org/licenses/by/4.0/legalcode	UAc	0a80feca-b411-428a-a34e-c5c2fa07cdba	Birds from Praia da Vitória marshes (Terceira, Azores, Portugal)	ObservedSpecimen	Palearctic	Portugal	Azores	Terceira	Praia da Vitória	Paul da Praia da Vitória	38°44'5.915"N, 27°3'36.131"W	38.735	-27.06	WGS84	6	10	2016.3.7	2016	LIFECWR TEAM	3	Animalia	Chordata	Aves	Anseriformes	Anatidae	Anas	americana		Anas americana	Gmelin, 1789	Anas americana Gmelin, 1789	species	Sofia Goulart, Mariana R. Brito and Sónia Santos	2016
9059	FieldObservation	https://creativecommons.org/licenses/by/4.0/legalcode	UAc	0a80feca-b411-428a-a34e-c5c2fa07cdba	Birds from Praia da Vitória marshes (Terceira, Azores, Portugal)	ObservedSpecimen	Palearctic	Portugal	Azores	Terceira	Praia da Vitória	Paul da Praia da Vitória	38°44'5.915"N, 27°3'36.131"W	38.735	-27.06	WGS84	6	10	2016.3.8	2016	LIFECWR TEAM	3	Animalia	Chordata	Aves	Anseriformes	Anatidae	Anas	americana		Anas americana	Gmelin, 1789	Anas americana Gmelin, 1789	species	Sofia Goulart, Mariana R. Brito and Sónia Santos	2016
9086	FieldObservation	https://creativecommons.org/licenses/by/4.0/legalcode	UAc	0a80feca-b411-428a-a34e-c5c2fa07cdba	Birds from Praia da Vitória marshes (Terceira, Azores, Portugal)	ObservedSpecimen	Palearctic	Portugal	Azores	Terceira	Praia da Vitória	Paul da Praia da Vitória	38°44'5.915"N, 27°3'36.131"W	38.735	-27.06	WGS84	6	10	2016.3.9	2016	LIFECWR TEAM	3	Animalia	Chordata	Aves	Anseriformes	Anatidae	Anas	americana		Anas americana	Gmelin, 1789	Anas americana Gmelin, 1789	species	Sofia Goulart, Mariana R. Brito and Sónia Santos	2016
9752	FieldObservation	https://creativecommons.org/licenses/by/4.0/legalcode	UAc	0a80feca-b411-428a-a34e-c5c2fa07cdba	Birds from Praia da Vitória marshes (Terceira, Azores, Portugal)	ObservedSpecimen	Palearctic	Portugal	Azores	Terceira	Praia da Vitória	Paul da Praia da Vitória	38°44'5.915"N, 27°3'36.131"W	38.735	-27.06	WGS84	6	10	2017.1.12	2017	LIFECWR TEAM	3	Animalia	Chordata	Aves	Anseriformes	Anatidae	Anas	americana		Anas americana	Gmelin, 1789	Anas americana Gmelin, 1789	species	Sofia Goulart, Mariana R. Brito and Sónia Santos	2017
9784	FieldObservation	https://creativecommons.org/licenses/by/4.0/legalcode	UAc	0a80feca-b411-428a-a34e-c5c2fa07cdba	Birds from Praia da Vitória marshes (Terceira, Azores, Portugal)	ObservedSpecimen	Palearctic	Portugal	Azores	Terceira	Praia da Vitória	Paul da Praia da Vitória	38°44'5.915"N, 27°3'36.131"W	38.735	-27.06	WGS84	6	10	2017.1.17	2017	LIFECWR TEAM	4	Animalia	Chordata	Aves	Anseriformes	Anatidae	Anas	americana		Anas americana	Gmelin, 1789	Anas americana Gmelin, 1789	species	Sofia Goulart, Mariana R. Brito and Sónia Santos	2017
9806	FieldObservation	https://creativecommons.org/licenses/by/4.0/legalcode	UAc	0a80feca-b411-428a-a34e-c5c2fa07cdba	Birds from Praia da Vitória marshes (Terceira, Azores, Portugal)	ObservedSpecimen	Palearctic	Portugal	Azores	Terceira	Praia da Vitória	Paul da Praia da Vitória	38°44'5.915"N, 27°3'36.131"W	38.735	-27.06	WGS84	6	10	2017.1.19	2017	LIFECWR TEAM	2	Animalia	Chordata	Aves	Anseriformes	Anatidae	Anas	americana		Anas americana	Gmelin, 1789	Anas americana Gmelin, 1789	species	Sofia Goulart, Mariana R. Brito and Sónia Santos	2017
9819	FieldObservation	https://creativecommons.org/licenses/by/4.0/legalcode	UAc	0a80feca-b411-428a-a34e-c5c2fa07cdba	Birds from Praia da Vitória marshes (Terceira, Azores, Portugal)	ObservedSpecimen	Palearctic	Portugal	Azores	Terceira	Praia da Vitória	Paul da Praia da Vitória	38°44'5.915"N, 27°3'36.131"W	38.735	-27.06	WGS84	6	10	2017.1.26	2017	LIFECWR TEAM	3	Animalia	Chordata	Aves	Anseriformes	Anatidae	Anas	americana		Anas americana	Gmelin, 1789	Anas americana Gmelin, 1789	species	Sofia Goulart, Mariana R. Brito and Sónia Santos	2017
9832	FieldObservation	https://creativecommons.org/licenses/by/4.0/legalcode	UAc	0a80feca-b411-428a-a34e-c5c2fa07cdba	Birds from Praia da Vitória marshes (Terceira, Azores, Portugal)	ObservedSpecimen	Palearctic	Portugal	Azores	Terceira	Praia da Vitória	Paul da Praia da Vitória	38°44'5.915"N, 27°3'36.131"W	38.735	-27.06	WGS84	6	10	2017.1.5	2017	LIFECWR TEAM	2	Animalia	Chordata	Aves	Anseriformes	Anatidae	Anas	americana		Anas americana	Gmelin, 1789	Anas americana Gmelin, 1789	species	Sofia Goulart, Mariana R. Brito and Sónia Santos	2017
9852	FieldObservation	https://creativecommons.org/licenses/by/4.0/legalcode	UAc	0a80feca-b411-428a-a34e-c5c2fa07cdba	Birds from Praia da Vitória marshes (Terceira, Azores, Portugal)	ObservedSpecimen	Palearctic	Portugal	Azores	Terceira	Praia da Vitória	Paul da Praia da Vitória	38°44'5.915"N, 27°3'36.131"W	38.735	-27.06	WGS84	6	10	2017.1.6	2017	LIFECWR TEAM	3	Animalia	Chordata	Aves	Anseriformes	Anatidae	Anas	americana		Anas americana	Gmelin, 1789	Anas americana Gmelin, 1789	species	Sofia Goulart, Mariana R. Brito and Sónia Santos	2017
9881	FieldObservation	https://creativecommons.org/licenses/by/4.0/legalcode	UAc	0a80feca-b411-428a-a34e-c5c2fa07cdba	Birds from Praia da Vitória marshes (Terceira, Azores, Portugal)	ObservedSpecimen	Palearctic	Portugal	Azores	Terceira	Praia da Vitória	Paul da Pedreira do Cabo da Praia	38°42'15,538"N, 27°2'47,222"W	38.7043	-27.0465	WGS84	3	10	2017.10.18	2017	LIFECWR TEAM	1	Animalia	Chordata	Aves	Anseriformes	Anatidae	Anas	americana		Anas americana	Gmelin, 1789	Anas americana Gmelin, 1789	species	Sofia Goulart, Mariana R. Brito and Sónia Santos	2017
9929	FieldObservation	https://creativecommons.org/licenses/by/4.0/legalcode	UAc	0a80feca-b411-428a-a34e-c5c2fa07cdba	Birds from Praia da Vitória marshes (Terceira, Azores, Portugal)	ObservedSpecimen	Palearctic	Portugal	Azores	Terceira	Praia da Vitória	Paul da Pedreira do Cabo da Praia	38°42'15,538"N, 27°2'47,222"W	38.7043	-27.0465	WGS84	3	10	2017.10.20	2017	LIFECWR TEAM	1	Animalia	Chordata	Aves	Anseriformes	Anatidae	Anas	americana		Anas americana	Gmelin, 1789	Anas americana Gmelin, 1789	species	Sofia Goulart, Mariana R. Brito and Sónia Santos	2017
9960	FieldObservation	https://creativecommons.org/licenses/by/4.0/legalcode	UAc	0a80feca-b411-428a-a34e-c5c2fa07cdba	Birds from Praia da Vitória marshes (Terceira, Azores, Portugal)	ObservedSpecimen	Palearctic	Portugal	Azores	Terceira	Praia da Vitória	Paul da Pedreira do Cabo da Praia	38°42'15,538"N, 27°2'47,222"W	38.7043	-27.0465	WGS84	3	10	2017.10.24	2017	LIFECWR TEAM	1	Animalia	Chordata	Aves	Anseriformes	Anatidae	Anas	americana		Anas americana	Gmelin, 1789	Anas americana Gmelin, 1789	species	Sofia Goulart, Mariana R. Brito and Sónia Santos	2017
10006	FieldObservation	https://creativecommons.org/licenses/by/4.0/legalcode	UAc	0a80feca-b411-428a-a34e-c5c2fa07cdba	Birds from Praia da Vitória marshes (Terceira, Azores, Portugal)	ObservedSpecimen	Palearctic	Portugal	Azores	Terceira	Praia da Vitória	Paul da Pedreira do Cabo da Praia	38°42'15,538"N, 27°2'47,222"W	38.7043	-27.0465	WGS84	3	10	2017.10.26	2017	LIFECWR TEAM	1	Animalia	Chordata	Aves	Anseriformes	Anatidae	Anas	americana		Anas americana	Gmelin, 1789	Anas americana Gmelin, 1789	species	Sofia Goulart, Mariana R. Brito and Sónia Santos	2017
10044	FieldObservation	https://creativecommons.org/licenses/by/4.0/legalcode	UAc	0a80feca-b411-428a-a34e-c5c2fa07cdba	Birds from Praia da Vitória marshes (Terceira, Azores, Portugal)	ObservedSpecimen	Palearctic	Portugal	Azores	Terceira	Praia da Vitória	Paul da Pedreira do Cabo da Praia	38°42'15,538"N, 27°2'47,222"W	38.7043	-27.0465	WGS84	3	10	2017.10.31	2017	LIFECWR TEAM	1	Animalia	Chordata	Aves	Anseriformes	Anatidae	Anas	americana		Anas americana	Gmelin, 1789	Anas americana Gmelin, 1789	species	Sofia Goulart, Mariana R. Brito and Sónia Santos	2017
10104	FieldObservation	https://creativecommons.org/licenses/by/4.0/legalcode	UAc	0a80feca-b411-428a-a34e-c5c2fa07cdba	Birds from Praia da Vitória marshes (Terceira, Azores, Portugal)	ObservedSpecimen	Palearctic	Portugal	Azores	Terceira	Praia da Vitória	Paul da Pedreira do Cabo da Praia	38°42'15,538"N, 27°2'47,222"W	38.7043	-27.0465	WGS84	3	10	2017.10.9	2017	LIFECWR TEAM	1	Animalia	Chordata	Aves	Anseriformes	Anatidae	Anas	americana		Anas americana	Gmelin, 1789	Anas americana Gmelin, 1789	species	Sofia Goulart, Mariana R. Brito and Sónia Santos	2017
10133	FieldObservation	https://creativecommons.org/licenses/by/4.0/legalcode	UAc	0a80feca-b411-428a-a34e-c5c2fa07cdba	Birds from Praia da Vitória marshes (Terceira, Azores, Portugal)	ObservedSpecimen	Palearctic	Portugal	Azores	Terceira	Praia da Vitória	Paul da Pedreira do Cabo da Praia	38°42'15,538"N, 27°2'47,222"W	38.7043	-27.0465	WGS84	3	10	2017.11.10	2017	LIFECWR TEAM	1	Animalia	Chordata	Aves	Anseriformes	Anatidae	Anas	americana		Anas americana	Gmelin, 1789	Anas americana Gmelin, 1789	species	Sofia Goulart, Mariana R. Brito and Sónia Santos	2017
10166	FieldObservation	https://creativecommons.org/licenses/by/4.0/legalcode	UAc	0a80feca-b411-428a-a34e-c5c2fa07cdba	Birds from Praia da Vitória marshes (Terceira, Azores, Portugal)	ObservedSpecimen	Palearctic	Portugal	Azores	Terceira	Praia da Vitória	Paul da Pedreira do Cabo da Praia	38°42'15,538"N, 27°2'47,222"W	38.7043	-27.0465	WGS84	3	10	2017.11.13	2017	LIFECWR TEAM	1	Animalia	Chordata	Aves	Anseriformes	Anatidae	Anas	americana		Anas americana	Gmelin, 1789	Anas americana Gmelin, 1789	species	Sofia Goulart, Mariana R. Brito and Sónia Santos	2017
10234	FieldObservation	https://creativecommons.org/licenses/by/4.0/legalcode	UAc	0a80feca-b411-428a-a34e-c5c2fa07cdba	Birds from Praia da Vitória marshes (Terceira, Azores, Portugal)	ObservedSpecimen	Palearctic	Portugal	Azores	Terceira	Praia da Vitória	Paul da Praia da Vitória	38°44'5.915"N, 27°3'36.131"W	38.735	-27.06	WGS84	6	10	2017.11.17	2017	LIFECWR TEAM	1	Animalia	Chordata	Aves	Anseriformes	Anatidae	Anas	americana		Anas americana	Gmelin, 1789	Anas americana Gmelin, 1789	species	Sofia Goulart, Mariana R. Brito and Sónia Santos	2017
10341	FieldObservation	https://creativecommons.org/licenses/by/4.0/legalcode	UAc	0a80feca-b411-428a-a34e-c5c2fa07cdba	Birds from Praia da Vitória marshes (Terceira, Azores, Portugal)	ObservedSpecimen	Palearctic	Portugal	Azores	Terceira	Praia da Vitória	Paul da Pedreira do Cabo da Praia	38°42'15,538"N, 27°2'47,222"W	38.7043	-27.0465	WGS84	3	10	2017.11.27	2017	LIFECWR TEAM	1	Animalia	Chordata	Aves	Anseriformes	Anatidae	Anas	americana		Anas americana	Gmelin, 1789	Anas americana Gmelin, 1789	species	Sofia Goulart, Mariana R. Brito and Sónia Santos	2017
10389	FieldObservation	https://creativecommons.org/licenses/by/4.0/legalcode	UAc	0a80feca-b411-428a-a34e-c5c2fa07cdba	Birds from Praia da Vitória marshes (Terceira, Azores, Portugal)	ObservedSpecimen	Palearctic	Portugal	Azores	Terceira	Praia da Vitória	Paul da Pedreira do Cabo da Praia	38°42'15,538"N, 27°2'47,222"W	38.7043	-27.0465	WGS84	3	10	2017.11.3	2017	LIFECWR TEAM	1	Animalia	Chordata	Aves	Anseriformes	Anatidae	Anas	americana		Anas americana	Gmelin, 1789	Anas americana Gmelin, 1789	species	Sofia Goulart, Mariana R. Brito and Sónia Santos	2017
10417	FieldObservation	https://creativecommons.org/licenses/by/4.0/legalcode	UAc	0a80feca-b411-428a-a34e-c5c2fa07cdba	Birds from Praia da Vitória marshes (Terceira, Azores, Portugal)	ObservedSpecimen	Palearctic	Portugal	Azores	Terceira	Praia da Vitória	Paul da Pedreira do Cabo da Praia	38°42'15,538"N, 27°2'47,222"W	38.7043	-27.0465	WGS84	3	10	2017.11.8	2017	LIFECWR TEAM	2	Animalia	Chordata	Aves	Anseriformes	Anatidae	Anas	americana		Anas americana	Gmelin, 1789	Anas americana Gmelin, 1789	species	Sofia Goulart, Mariana R. Brito and Sónia Santos	2017
10439	FieldObservation	https://creativecommons.org/licenses/by/4.0/legalcode	UAc	0a80feca-b411-428a-a34e-c5c2fa07cdba	Birds from Praia da Vitória marshes (Terceira, Azores, Portugal)	ObservedSpecimen	Palearctic	Portugal	Azores	Terceira	Praia da Vitória	Paul da Pedreira do Cabo da Praia	38°42'15,538"N, 27°2'47,222"W	38.7043	-27.0465	WGS84	3	10	2017.11.9	2017	LIFECWR TEAM	2	Animalia	Chordata	Aves	Anseriformes	Anatidae	Anas	americana		Anas americana	Gmelin, 1789	Anas americana Gmelin, 1789	species	Sofia Goulart, Mariana R. Brito and Sónia Santos	2017
10440	FieldObservation	https://creativecommons.org/licenses/by/4.0/legalcode	UAc	0a80feca-b411-428a-a34e-c5c2fa07cdba	Birds from Praia da Vitória marshes (Terceira, Azores, Portugal)	ObservedSpecimen	Palearctic	Portugal	Azores	Terceira	Praia da Vitória	Paul da Praia da Vitória	38°44'5.915"N, 27°3'36.131"W	38.735	-27.06	WGS84	6	10	2017.11.9	2017	LIFECWR TEAM	2	Animalia	Chordata	Aves	Anseriformes	Anatidae	Anas	americana		Anas americana	Gmelin, 1789	Anas americana Gmelin, 1789	species	Sofia Goulart, Mariana R. Brito and Sónia Santos	2017
10533	FieldObservation	https://creativecommons.org/licenses/by/4.0/legalcode	UAc	0a80feca-b411-428a-a34e-c5c2fa07cdba	Birds from Praia da Vitória marshes (Terceira, Azores, Portugal)	ObservedSpecimen	Palearctic	Portugal	Azores	Terceira	Praia da Vitória	Paul da Pedreira do Cabo da Praia	38°42'15,538"N, 27°2'47,222"W	38.7043	-27.0465	WGS84	3	10	2017.12.29	2017	LIFECWR TEAM	1	Animalia	Chordata	Aves	Anseriformes	Anatidae	Anas	americana		Anas americana	Gmelin, 1789	Anas americana Gmelin, 1789	species	Sofia Goulart, Mariana R. Brito and Sónia Santos	2017
10600	FieldObservation	https://creativecommons.org/licenses/by/4.0/legalcode	UAc	0a80feca-b411-428a-a34e-c5c2fa07cdba	Birds from Praia da Vitória marshes (Terceira, Azores, Portugal)	ObservedSpecimen	Palearctic	Portugal	Azores	Terceira	Praia da Vitória	Paul da Praia da Vitória	38°44'5.915"N, 27°3'36.131"W	38.735	-27.06	WGS84	6	10	2017.12.7	2017	LIFECWR TEAM	1	Animalia	Chordata	Aves	Anseriformes	Anatidae	Anas	americana		Anas americana	Gmelin, 1789	Anas americana Gmelin, 1789	species	Sofia Goulart, Mariana R. Brito and Sónia Santos	2017
10641	FieldObservation	https://creativecommons.org/licenses/by/4.0/legalcode	UAc	0a80feca-b411-428a-a34e-c5c2fa07cdba	Birds from Praia da Vitória marshes (Terceira, Azores, Portugal)	ObservedSpecimen	Palearctic	Portugal	Azores	Terceira	Praia da Vitória	Paul da Praia da Vitória	38°44'5.915"N, 27°3'36.131"W	38.735	-27.06	WGS84	6	10	2017.2.17	2017	LIFECWR TEAM	2	Animalia	Chordata	Aves	Anseriformes	Anatidae	Anas	americana		Anas americana	Gmelin, 1789	Anas americana Gmelin, 1789	species	Sofia Goulart, Mariana R. Brito and Sónia Santos	2017
10704	FieldObservation	https://creativecommons.org/licenses/by/4.0/legalcode	UAc	0a80feca-b411-428a-a34e-c5c2fa07cdba	Birds from Praia da Vitória marshes (Terceira, Azores, Portugal)	ObservedSpecimen	Palearctic	Portugal	Azores	Terceira	Praia da Vitória	Paul da Praia da Vitória	38°44'5.915"N, 27°3'36.131"W	38.735	-27.06	WGS84	6	10	2017.2.7	2017	LIFECWR TEAM	4	Animalia	Chordata	Aves	Anseriformes	Anatidae	Anas	americana		Anas americana	Gmelin, 1789	Anas americana Gmelin, 1789	species	Sofia Goulart, Mariana R. Brito and Sónia Santos	2017
10723	FieldObservation	https://creativecommons.org/licenses/by/4.0/legalcode	UAc	0a80feca-b411-428a-a34e-c5c2fa07cdba	Birds from Praia da Vitória marshes (Terceira, Azores, Portugal)	ObservedSpecimen	Palearctic	Portugal	Azores	Terceira	Praia da Vitória	Paul da Praia da Vitória	38°44'5.915"N, 27°3'36.131"W	38.735	-27.06	WGS84	6	10	2017.3.1	2017	LIFECWR TEAM	6	Animalia	Chordata	Aves	Anseriformes	Anatidae	Anas	americana		Anas americana	Gmelin, 1789	Anas americana Gmelin, 1789	species	Sofia Goulart, Mariana R. Brito and Sónia Santos	2017
10743	FieldObservation	https://creativecommons.org/licenses/by/4.0/legalcode	UAc	0a80feca-b411-428a-a34e-c5c2fa07cdba	Birds from Praia da Vitória marshes (Terceira, Azores, Portugal)	ObservedSpecimen	Palearctic	Portugal	Azores	Terceira	Praia da Vitória	Paul da Praia da Vitória	38°44'5.915"N, 27°3'36.131"W	38.735	-27.06	WGS84	6	10	2017.3.10	2017	LIFECWR TEAM	4	Animalia	Chordata	Aves	Anseriformes	Anatidae	Anas	americana		Anas americana	Gmelin, 1789	Anas americana Gmelin, 1789	species	Sofia Goulart, Mariana R. Brito and Sónia Santos	2017
10815	FieldObservation	https://creativecommons.org/licenses/by/4.0/legalcode	UAc	0a80feca-b411-428a-a34e-c5c2fa07cdba	Birds from Praia da Vitória marshes (Terceira, Azores, Portugal)	ObservedSpecimen	Palearctic	Portugal	Azores	Terceira	Praia da Vitória	Paul da Praia da Vitória	38°44'5.915"N, 27°3'36.131"W	38.735	-27.06	WGS84	6	10	2017.3.21	2017	LIFECWR TEAM	3	Animalia	Chordata	Aves	Anseriformes	Anatidae	Anas	americana		Anas americana	Gmelin, 1789	Anas americana Gmelin, 1789	species	Sofia Goulart, Mariana R. Brito and Sónia Santos	2017
10822	FieldObservation	https://creativecommons.org/licenses/by/4.0/legalcode	UAc	0a80feca-b411-428a-a34e-c5c2fa07cdba	Birds from Praia da Vitória marshes (Terceira, Azores, Portugal)	ObservedSpecimen	Palearctic	Portugal	Azores	Terceira	Praia da Vitória	Paul da Praia da Vitória	38°44'5.915"N, 27°3'36.131"W	38.735	-27.06	WGS84	6	10	2017.3.22	2017	LIFECWR TEAM	4	Animalia	Chordata	Aves	Anseriformes	Anatidae	Anas	americana		Anas americana	Gmelin, 1789	Anas americana Gmelin, 1789	species	Sofia Goulart, Mariana R. Brito and Sónia Santos	2017
10828	FieldObservation	https://creativecommons.org/licenses/by/4.0/legalcode	UAc	0a80feca-b411-428a-a34e-c5c2fa07cdba	Birds from Praia da Vitória marshes (Terceira, Azores, Portugal)	ObservedSpecimen	Palearctic	Portugal	Azores	Terceira	Praia da Vitória	Paul da Praia da Vitória	38°44'5.915"N, 27°3'36.131"W	38.735	-27.06	WGS84	6	10	2017.3.23	2017	LIFECWR TEAM	4	Animalia	Chordata	Aves	Anseriformes	Anatidae	Anas	americana		Anas americana	Gmelin, 1789	Anas americana Gmelin, 1789	species	Sofia Goulart, Mariana R. Brito and Sónia Santos	2017
10847	FieldObservation	https://creativecommons.org/licenses/by/4.0/legalcode	UAc	0a80feca-b411-428a-a34e-c5c2fa07cdba	Birds from Praia da Vitória marshes (Terceira, Azores, Portugal)	ObservedSpecimen	Palearctic	Portugal	Azores	Terceira	Praia da Vitória	Paul da Praia da Vitória	38°44'5.915"N, 27°3'36.131"W	38.735	-27.06	WGS84	6	10	2017.3.30	2017	LIFECWR TEAM	2	Animalia	Chordata	Aves	Anseriformes	Anatidae	Anas	americana		Anas americana	Gmelin, 1789	Anas americana Gmelin, 1789	species	Sofia Goulart, Mariana R. Brito and Sónia Santos	2017
10867	FieldObservation	https://creativecommons.org/licenses/by/4.0/legalcode	UAc	0a80feca-b411-428a-a34e-c5c2fa07cdba	Birds from Praia da Vitória marshes (Terceira, Azores, Portugal)	ObservedSpecimen	Palearctic	Portugal	Azores	Terceira	Praia da Vitória	Paul da Praia da Vitória	38°44'5.915"N, 27°3'36.131"W	38.735	-27.06	WGS84	6	10	2017.3.31	2017	LIFECWR TEAM	6	Animalia	Chordata	Aves	Anseriformes	Anatidae	Anas	americana		Anas americana	Gmelin, 1789	Anas americana Gmelin, 1789	species	Sofia Goulart, Mariana R. Brito and Sónia Santos	2017
10987	FieldObservation	https://creativecommons.org/licenses/by/4.0/legalcode	UAc	0a80feca-b411-428a-a34e-c5c2fa07cdba	Birds from Praia da Vitória marshes (Terceira, Azores, Portugal)	ObservedSpecimen	Palearctic	Portugal	Azores	Terceira	Praia da Vitória	Paul da Praia da Vitória	38°44'5.915"N, 27°3'36.131"W	38.735	-27.06	WGS84	6	10	2017.4.3	2017	LIFECWR TEAM	5	Animalia	Chordata	Aves	Anseriformes	Anatidae	Anas	americana		Anas americana	Gmelin, 1789	Anas americana Gmelin, 1789	species	Sofia Goulart, Mariana R. Brito and Sónia Santos	2017
11008	FieldObservation	https://creativecommons.org/licenses/by/4.0/legalcode	UAc	0a80feca-b411-428a-a34e-c5c2fa07cdba	Birds from Praia da Vitória marshes (Terceira, Azores, Portugal)	ObservedSpecimen	Palearctic	Portugal	Azores	Terceira	Praia da Vitória	Paul da Praia da Vitória	38°44'5.915"N, 27°3'36.131"W	38.735	-27.06	WGS84	6	10	2017.4.4	2017	LIFECWR TEAM	3	Animalia	Chordata	Aves	Anseriformes	Anatidae	Anas	americana		Anas americana	Gmelin, 1789	Anas americana Gmelin, 1789	species	Sofia Goulart, Mariana R. Brito and Sónia Santos	2017
11013	FieldObservation	https://creativecommons.org/licenses/by/4.0/legalcode	UAc	0a80feca-b411-428a-a34e-c5c2fa07cdba	Birds from Praia da Vitória marshes (Terceira, Azores, Portugal)	ObservedSpecimen	Palearctic	Portugal	Azores	Terceira	Praia da Vitória	Paul da Praia da Vitória	38°44'5.915"N, 27°3'36.131"W	38.735	-27.06	WGS84	6	10	2017.4.5	2017	LIFECWR TEAM	3	Animalia	Chordata	Aves	Anseriformes	Anatidae	Anas	americana		Anas americana	Gmelin, 1789	Anas americana Gmelin, 1789	species	Sofia Goulart, Mariana R. Brito and Sónia Santos	2017
11028	FieldObservation	https://creativecommons.org/licenses/by/4.0/legalcode	UAc	0a80feca-b411-428a-a34e-c5c2fa07cdba	Birds from Praia da Vitória marshes (Terceira, Azores, Portugal)	ObservedSpecimen	Palearctic	Portugal	Azores	Terceira	Praia da Vitória	Paul da Praia da Vitória	38°44'5.915"N, 27°3'36.131"W	38.735	-27.06	WGS84	6	10	2017.4.6	2017	LIFECWR TEAM	3	Animalia	Chordata	Aves	Anseriformes	Anatidae	Anas	americana		Anas americana	Gmelin, 1789	Anas americana Gmelin, 1789	species	Sofia Goulart, Mariana R. Brito and Sónia Santos	2017
12108	FieldObservation	https://creativecommons.org/licenses/by/4.0/legalcode	UAc	0a80feca-b411-428a-a34e-c5c2fa07cdba	Birds from Praia da Vitória marshes (Terceira, Azores, Portugal)	ObservedSpecimen	Palearctic	Portugal	Azores	Terceira	Praia da Vitória	Paul da Praia da Vitória	38°44'5.915"N, 27°3'36.131"W	38.735	-27.06	WGS84	6	10	2018.1.12	2018	LIFECWR TEAM	5	Animalia	Chordata	Aves	Anseriformes	Anatidae	Anas	americana		Anas americana	Gmelin, 1789	Anas americana Gmelin, 1789	species	Sofia Goulart, Mariana R. Brito and Sónia Santos	2018
12125	FieldObservation	https://creativecommons.org/licenses/by/4.0/legalcode	UAc	0a80feca-b411-428a-a34e-c5c2fa07cdba	Birds from Praia da Vitória marshes (Terceira, Azores, Portugal)	ObservedSpecimen	Palearctic	Portugal	Azores	Terceira	Praia da Vitória	Paul da Praia da Vitória	38°44'5.915"N, 27°3'36.131"W	38.735	-27.06	WGS84	6	10	2018.1.18	2018	LIFECWR TEAM	1	Animalia	Chordata	Aves	Anseriformes	Anatidae	Anas	americana		Anas americana	Gmelin, 1789	Anas americana Gmelin, 1789	species	Sofia Goulart, Mariana R. Brito and Sónia Santos	2018
12136	FieldObservation	https://creativecommons.org/licenses/by/4.0/legalcode	UAc	0a80feca-b411-428a-a34e-c5c2fa07cdba	Birds from Praia da Vitória marshes (Terceira, Azores, Portugal)	ObservedSpecimen	Palearctic	Portugal	Azores	Terceira	Praia da Vitória	Paul da Praia da Vitória	38°44'5.915"N, 27°3'36.131"W	38.735	-27.06	WGS84	6	10	2018.1.2	2018	LIFECWR TEAM	2	Animalia	Chordata	Aves	Anseriformes	Anatidae	Anas	americana		Anas americana	Gmelin, 1789	Anas americana Gmelin, 1789	species	Sofia Goulart, Mariana R. Brito and Sónia Santos	2018
2826	FieldObservation	https://creativecommons.org/licenses/by/4.0/legalcode	UAc	0a80feca-b411-428a-a34e-c5c2fa07cdba	Birds from Praia da Vitória marshes (Terceira, Azores, Portugal)	ObservedSpecimen	Palearctic	Portugal	Azores	Terceira	Praia da Vitória	Paul da Pedreira do Cabo da Praia	38°42'15,538"N, 27°2'47,222"W	38.7043	-27.0465	WGS84	3	10	2014.11.23	2014	LIFECWR TEAM	1	Animalia	Chordata	Aves	Anseriformes	Anatidae	Anas	carolinensis		Anas carolinensis	Gmelin, 1789	Anas carolinensis Gmelin, 1789	species	Sofia Goulart, Mariana R. Brito and Sónia Santos	2015
2841	FieldObservation	https://creativecommons.org/licenses/by/4.0/legalcode	UAc	0a80feca-b411-428a-a34e-c5c2fa07cdba	Birds from Praia da Vitória marshes (Terceira, Azores, Portugal)	ObservedSpecimen	Palearctic	Portugal	Azores	Terceira	Praia da Vitória	Paul da Pedreira do Cabo da Praia	38°42'15,538"N, 27°2'47,222"W	38.7043	-27.0465	WGS84	3	10	2014.11.25	2014	LIFECWR TEAM	1	Animalia	Chordata	Aves	Anseriformes	Anatidae	Anas	carolinensis		Anas carolinensis	Gmelin, 1789	Anas carolinensis Gmelin, 1789	species	Sofia Goulart, Mariana R. Brito and Sónia Santos	2015
2890	FieldObservation	https://creativecommons.org/licenses/by/4.0/legalcode	UAc	0a80feca-b411-428a-a34e-c5c2fa07cdba	Birds from Praia da Vitória marshes (Terceira, Azores, Portugal)	ObservedSpecimen	Palearctic	Portugal	Azores	Terceira	Praia da Vitória	Paul da Pedreira do Cabo da Praia	38°42'15,538"N, 27°2'47,222"W	38.7043	-27.0465	WGS84	3	10	2014.11.30	2014	LIFECWR TEAM	1	Animalia	Chordata	Aves	Anseriformes	Anatidae	Anas	carolinensis		Anas carolinensis	Gmelin, 1789	Anas carolinensis Gmelin, 1789	species	Sofia Goulart, Mariana R. Brito and Sónia Santos	2015
2958	FieldObservation	https://creativecommons.org/licenses/by/4.0/legalcode	UAc	0a80feca-b411-428a-a34e-c5c2fa07cdba	Birds from Praia da Vitória marshes (Terceira, Azores, Portugal)	ObservedSpecimen	Palearctic	Portugal	Azores	Terceira	Praia da Vitória	Paul da Pedreira do Cabo da Praia	38°42'15,538"N, 27°2'47,222"W	38.7043	-27.0465	WGS84	3	10	2014.12.10	2014	LIFECWR TEAM	1	Animalia	Chordata	Aves	Anseriformes	Anatidae	Anas	carolinensis		Anas carolinensis	Gmelin, 1789	Anas carolinensis Gmelin, 1789	species	Sofia Goulart, Mariana R. Brito and Sónia Santos	2015
2959	FieldObservation	https://creativecommons.org/licenses/by/4.0/legalcode	UAc	0a80feca-b411-428a-a34e-c5c2fa07cdba	Birds from Praia da Vitória marshes (Terceira, Azores, Portugal)	ObservedSpecimen	Palearctic	Portugal	Azores	Terceira	Praia da Vitória	Paul da Pedreira do Cabo da Praia	38°42'15,538"N, 27°2'47,222"W	38.7043	-27.0465	WGS84	3	10	2014.12.2	2014	LIFECWR TEAM	1	Animalia	Chordata	Aves	Anseriformes	Anatidae	Anas	carolinensis		Anas carolinensis	Gmelin, 1789	Anas carolinensis Gmelin, 1789	species	Sofia Goulart, Mariana R. Brito and Sónia Santos	2015
2960	FieldObservation	https://creativecommons.org/licenses/by/4.0/legalcode	UAc	0a80feca-b411-428a-a34e-c5c2fa07cdba	Birds from Praia da Vitória marshes (Terceira, Azores, Portugal)	ObservedSpecimen	Palearctic	Portugal	Azores	Terceira	Praia da Vitória	Paul da Pedreira do Cabo da Praia	38°42'15,538"N, 27°2'47,222"W	38.7043	-27.0465	WGS84	3	10	2014.12.22	2014	LIFECWR TEAM	1	Animalia	Chordata	Aves	Anseriformes	Anatidae	Anas	carolinensis		Anas carolinensis	Gmelin, 1789	Anas carolinensis Gmelin, 1789	species	Sofia Goulart, Mariana R. Brito and Sónia Santos	2015
2961	FieldObservation	https://creativecommons.org/licenses/by/4.0/legalcode	UAc	0a80feca-b411-428a-a34e-c5c2fa07cdba	Birds from Praia da Vitória marshes (Terceira, Azores, Portugal)	ObservedSpecimen	Palearctic	Portugal	Azores	Terceira	Praia da Vitória	Paul da Pedreira do Cabo da Praia	38°42'15,538"N, 27°2'47,222"W	38.7043	-27.0465	WGS84	3	10	2014.12.3	2014	LIFECWR TEAM	1	Animalia	Chordata	Aves	Anseriformes	Anatidae	Anas	carolinensis		Anas carolinensis	Gmelin, 1789	Anas carolinensis Gmelin, 1789	species	Sofia Goulart, Mariana R. Brito and Sónia Santos	2015
2962	FieldObservation	https://creativecommons.org/licenses/by/4.0/legalcode	UAc	0a80feca-b411-428a-a34e-c5c2fa07cdba	Birds from Praia da Vitória marshes (Terceira, Azores, Portugal)	ObservedSpecimen	Palearctic	Portugal	Azores	Terceira	Praia da Vitória	Paul da Pedreira do Cabo da Praia	38°42'15,538"N, 27°2'47,222"W	38.7043	-27.0465	WGS84	3	10	2014.12.30	2014	LIFECWR TEAM	1	Animalia	Chordata	Aves	Anseriformes	Anatidae	Anas	carolinensis		Anas carolinensis	Gmelin, 1789	Anas carolinensis Gmelin, 1789	species	Sofia Goulart, Mariana R. Brito and Sónia Santos	2015
7989	FieldObservation	https://creativecommons.org/licenses/by/4.0/legalcode	UAc	0a80feca-b411-428a-a34e-c5c2fa07cdba	Birds from Praia da Vitória marshes (Terceira, Azores, Portugal)	ObservedSpecimen	Palearctic	Portugal	Azores	Terceira	Praia da Vitória	Paul da Pedreira do Cabo da Praia	38°42'15,538"N, 27°2'47,222"W	38.7043	-27.0465	WGS84	3	10	2016.1.7	2016	LIFECWR TEAM	1	Animalia	Chordata	Aves	Anseriformes	Anatidae	Anas	carolinensis		Anas carolinensis	Gmelin, 1789	Anas carolinensis Gmelin, 1789	species	Sofia Goulart, Mariana R. Brito and Sónia Santos	2016
1051	FieldObservation	https://creativecommons.org/licenses/by/4.0/legalcode	UAc	0a80feca-b411-428a-a34e-c5c2fa07cdba	Birds from Praia da Vitória marshes (Terceira, Azores, Portugal)	ObservedSpecimen	Palearctic	Portugal	Azores	Terceira	Praia da Vitória	Paul da Praia da Vitória	38°44'5.915"N, 27°3'36.131"W	38.735	-27.06	WGS84	6	10	2013.11.12	2013	LIFECWR TEAM	1	Animalia	Chordata	Aves	Anseriformes	Anatidae	Anas	clypeata		Anas clypeata	Linnaeus, 1758	Anas clypeata Linnaeus, 1758	species	Sofia Goulart, Mariana R. Brito and Sónia Santos	2013
55	FieldObservation	https://creativecommons.org/licenses/by/4.0/legalcode	UAc	0a80feca-b411-428a-a34e-c5c2fa07cdba	Birds from Praia da Vitória marshes (Terceira, Azores, Portugal)	ObservedSpecimen	Palearctic	Portugal	Azores	Terceira	Praia da Vitória	Paul da Pedreira do Cabo da Praia	38°42'15,538"N, 27°2'47,222"W	38.7043	-27.0465	WGS84	3	10	2018.10.02	2018	LIFECWR TEAM	1	Animalia	Chordata	Aves	Anseriformes	Anatidae	Anas	crecca		Anas crecca	Linnaeus, 1758	Anas crecca Linnaeus, 1758	species	Sofia Goulart, Mariana R. Brito and Sónia Santos	2018
103	FieldObservation	https://creativecommons.org/licenses/by/4.0/legalcode	UAc	0a80feca-b411-428a-a34e-c5c2fa07cdba	Birds from Praia da Vitória marshes (Terceira, Azores, Portugal)	ObservedSpecimen	Palearctic	Portugal	Azores	Terceira	Praia da Vitória	Paul da Pedreira do Cabo da Praia	38°42'15,538"N, 27°2'47,222"W	38.7043	-27.0465	WGS84	3	10	2018.10.03	2018	LIFECWR TEAM	1	Animalia	Chordata	Aves	Anseriformes	Anatidae	Anas	crecca		Anas crecca	Linnaeus, 1758	Anas crecca Linnaeus, 1758	species	Sofia Goulart, Mariana R. Brito and Sónia Santos	2018
150	FieldObservation	https://creativecommons.org/licenses/by/4.0/legalcode	UAc	0a80feca-b411-428a-a34e-c5c2fa07cdba	Birds from Praia da Vitória marshes (Terceira, Azores, Portugal)	ObservedSpecimen	Palearctic	Portugal	Azores	Terceira	Praia da Vitória	Paul da Pedreira do Cabo da Praia	38°42'15,538"N, 27°2'47,222"W	38.7043	-27.0465	WGS84	3	10	2018.10.04	2018	LIFECWR TEAM	1	Animalia	Chordata	Aves	Anseriformes	Anatidae	Anas	crecca		Anas crecca	Linnaeus, 1758	Anas crecca Linnaeus, 1758	species	Sofia Goulart, Mariana R. Brito and Sónia Santos	2018
206	FieldObservation	https://creativecommons.org/licenses/by/4.0/legalcode	UAc	0a80feca-b411-428a-a34e-c5c2fa07cdba	Birds from Praia da Vitória marshes (Terceira, Azores, Portugal)	ObservedSpecimen	Palearctic	Portugal	Azores	Terceira	Praia da Vitória	Paul da Praia da Vitória	38°44'5.915"N, 27°3'36.131"W	38.735	-27.06	WGS84	6	10	2018.02.08	2018	LIFECWR TEAM	6	Animalia	Chordata	Aves	Anseriformes	Anatidae	Anas	crecca		Anas crecca	Linnaeus, 1758	Anas crecca Linnaeus, 1758	species	Sofia Goulart, Mariana R. Brito and Sónia Santos	2018
306	FieldObservation	https://creativecommons.org/licenses/by/4.0/legalcode	UAc	0a80feca-b411-428a-a34e-c5c2fa07cdba	Birds from Praia da Vitória marshes (Terceira, Azores, Portugal)	ObservedSpecimen	Palearctic	Portugal	Azores	Terceira	Praia da Vitória	Paul da Pedreira do Cabo da Praia	38°42'15,538"N, 27°2'47,222"W	38.7043	-27.0465	WGS84	3	10	2018.10.10	2018	LIFECWR TEAM	1	Animalia	Chordata	Aves	Anseriformes	Anatidae	Anas	crecca		Anas crecca	Linnaeus, 1758	Anas crecca Linnaeus, 1758	species	Sofia Goulart, Mariana R. Brito and Sónia Santos	2018
398	FieldObservation	https://creativecommons.org/licenses/by/4.0/legalcode	UAc	0a80feca-b411-428a-a34e-c5c2fa07cdba	Birds from Praia da Vitória marshes (Terceira, Azores, Portugal)	ObservedSpecimen	Palearctic	Portugal	Azores	Terceira	Praia da Vitória	Paul da Pedreira do Cabo da Praia	38°42'15,538"N, 27°2'47,222"W	38.7043	-27.0465	WGS84	3	10	2018.10.15	2018	LIFECWR TEAM	1	Animalia	Chordata	Aves	Anseriformes	Anatidae	Anas	crecca		Anas crecca	Linnaeus, 1758	Anas crecca Linnaeus, 1758	species	Sofia Goulart, Mariana R. Brito and Sónia Santos	2018
517	FieldObservation	https://creativecommons.org/licenses/by/4.0/legalcode	UAc	0a80feca-b411-428a-a34e-c5c2fa07cdba	Birds from Praia da Vitória marshes (Terceira, Azores, Portugal)	ObservedSpecimen	Palearctic	Portugal	Azores	Terceira	Praia da Vitória	Paul da Pedreira do Cabo da Praia	38°42'15,538"N, 27°2'47,222"W	38.7043	-27.0465	WGS84	3	10	2018.10.18	2018	LIFECWR TEAM	1	Animalia	Chordata	Aves	Anseriformes	Anatidae	Anas	crecca		Anas crecca	Linnaeus, 1758	Anas crecca Linnaeus, 1758	species	Sofia Goulart, Mariana R. Brito and Sónia Santos	2018
685	FieldObservation	https://creativecommons.org/licenses/by/4.0/legalcode	UAc	0a80feca-b411-428a-a34e-c5c2fa07cdba	Birds from Praia da Vitória marshes (Terceira, Azores, Portugal)	ObservedSpecimen	Palearctic	Portugal	Azores	Terceira	Praia da Vitória	Paul da Pedreira do Cabo da Praia	38°42'15,538"N, 27°2'47,222"W	38.7043	-27.0465	WGS84	3	10	2013.10.16	2013	LIFECWR TEAM	1	Animalia	Chordata	Aves	Anseriformes	Anatidae	Anas	crecca		Anas crecca	Linnaeus, 1758	Anas crecca Linnaeus, 1758	species	Sofia Goulart, Mariana R. Brito and Sónia Santos	2013
733	FieldObservation	https://creativecommons.org/licenses/by/4.0/legalcode	UAc	0a80feca-b411-428a-a34e-c5c2fa07cdba	Birds from Praia da Vitória marshes (Terceira, Azores, Portugal)	ObservedSpecimen	Palearctic	Portugal	Azores	Terceira	Praia da Vitória	Paul da Pedreira do Cabo da Praia	38°42'15,538"N, 27°2'47,222"W	38.7043	-27.0465	WGS84	3	10	2013.10.18	2013	LIFECWR TEAM	1	Animalia	Chordata	Aves	Anseriformes	Anatidae	Anas	crecca		Anas crecca	Linnaeus, 1758	Anas crecca Linnaeus, 1758	species	Sofia Goulart, Mariana R. Brito and Sónia Santos	2013
791	FieldObservation	https://creativecommons.org/licenses/by/4.0/legalcode	UAc	0a80feca-b411-428a-a34e-c5c2fa07cdba	Birds from Praia da Vitória marshes (Terceira, Azores, Portugal)	ObservedSpecimen	Palearctic	Portugal	Azores	Terceira	Praia da Vitória	Paul da Pedreira do Cabo da Praia	38°42'15,538"N, 27°2'47,222"W	38.7043	-27.0465	WGS84	3	10	2013.10.23	2013	LIFECWR TEAM	1	Animalia	Chordata	Aves	Anseriformes	Anatidae	Anas	crecca		Anas crecca	Linnaeus, 1758	Anas crecca Linnaeus, 1758	species	Sofia Goulart, Mariana R. Brito and Sónia Santos	2013
817	FieldObservation	https://creativecommons.org/licenses/by/4.0/legalcode	UAc	0a80feca-b411-428a-a34e-c5c2fa07cdba	Birds from Praia da Vitória marshes (Terceira, Azores, Portugal)	ObservedSpecimen	Palearctic	Portugal	Azores	Terceira	Praia da Vitória	Paul da Pedreira do Cabo da Praia	38°42'15,538"N, 27°2'47,222"W	38.7043	-27.0465	WGS84	3	10	2013.10.24	2013	LIFECWR TEAM	1	Animalia	Chordata	Aves	Anseriformes	Anatidae	Anas	crecca		Anas crecca	Linnaeus, 1758	Anas crecca Linnaeus, 1758	species	Sofia Goulart, Mariana R. Brito and Sónia Santos	2013
841	FieldObservation	https://creativecommons.org/licenses/by/4.0/legalcode	UAc	0a80feca-b411-428a-a34e-c5c2fa07cdba	Birds from Praia da Vitória marshes (Terceira, Azores, Portugal)	ObservedSpecimen	Palearctic	Portugal	Azores	Terceira	Praia da Vitória	Paul da Pedreira do Cabo da Praia	38°42'15,538"N, 27°2'47,222"W	38.7043	-27.0465	WGS84	3	10	2013.10.25	2013	LIFECWR TEAM	1	Animalia	Chordata	Aves	Anseriformes	Anatidae	Anas	crecca		Anas crecca	Linnaeus, 1758	Anas crecca Linnaeus, 1758	species	Sofia Goulart, Mariana R. Brito and Sónia Santos	2013
858	FieldObservation	https://creativecommons.org/licenses/by/4.0/legalcode	UAc	0a80feca-b411-428a-a34e-c5c2fa07cdba	Birds from Praia da Vitória marshes (Terceira, Azores, Portugal)	ObservedSpecimen	Palearctic	Portugal	Azores	Terceira	Praia da Vitória	Paul da Pedreira do Cabo da Praia	38°42'15,538"N, 27°2'47,222"W	38.7043	-27.0465	WGS84	3	10	2013.10.28	2013	LIFECWR TEAM	1	Animalia	Chordata	Aves	Anseriformes	Anatidae	Anas	crecca		Anas crecca	Linnaeus, 1758	Anas crecca Linnaeus, 1758	species	Sofia Goulart, Mariana R. Brito and Sónia Santos	2013
1004	FieldObservation	https://creativecommons.org/licenses/by/4.0/legalcode	UAc	0a80feca-b411-428a-a34e-c5c2fa07cdba	Birds from Praia da Vitória marshes (Terceira, Azores, Portugal)	ObservedSpecimen	Palearctic	Portugal	Azores	Terceira	Praia da Vitória	Paul da Pedreira do Cabo da Praia	38°42'15,538"N, 27°2'47,222"W	38.7043	-27.0465	WGS84	3	10	2013.11.01	2013	LIFECWR TEAM	1	Animalia	Chordata	Aves	Anseriformes	Anatidae	Anas	crecca		Anas crecca	Linnaeus, 1758	Anas crecca Linnaeus, 1758	species	Sofia Goulart, Mariana R. Brito and Sónia Santos	2013
1183	FieldObservation	https://creativecommons.org/licenses/by/4.0/legalcode	UAc	0a80feca-b411-428a-a34e-c5c2fa07cdba	Birds from Praia da Vitória marshes (Terceira, Azores, Portugal)	ObservedSpecimen	Palearctic	Portugal	Azores	Terceira	Praia da Vitória	Paul da Pedreira do Cabo da Praia	38°42'15,538"N, 27°2'47,222"W	38.7043	-27.0465	WGS84	3	10	2013.11.25	2013	LIFECWR TEAM	3	Animalia	Chordata	Aves	Anseriformes	Anatidae	Anas	crecca		Anas crecca	Linnaeus, 1758	Anas crecca Linnaeus, 1758	species	Sofia Goulart, Mariana R. Brito and Sónia Santos	2013
1223	FieldObservation	https://creativecommons.org/licenses/by/4.0/legalcode	UAc	0a80feca-b411-428a-a34e-c5c2fa07cdba	Birds from Praia da Vitória marshes (Terceira, Azores, Portugal)	ObservedSpecimen	Palearctic	Portugal	Azores	Terceira	Praia da Vitória	Paul da Pedreira do Cabo da Praia	38°42'15,538"N, 27°2'47,222"W	38.7043	-27.0465	WGS84	3	10	2013.11.27	2013	LIFECWR TEAM	3	Animalia	Chordata	Aves	Anseriformes	Anatidae	Anas	crecca		Anas crecca	Linnaeus, 1758	Anas crecca Linnaeus, 1758	species	Sofia Goulart, Mariana R. Brito and Sónia Santos	2013
1266	FieldObservation	https://creativecommons.org/licenses/by/4.0/legalcode	UAc	0a80feca-b411-428a-a34e-c5c2fa07cdba	Birds from Praia da Vitória marshes (Terceira, Azores, Portugal)	ObservedSpecimen	Palearctic	Portugal	Azores	Terceira	Praia da Vitória	Paul da Pedreira do Cabo da Praia	38°42'15,538"N, 27°2'47,222"W	38.7043	-27.0465	WGS84	3	10	2013.11.29	2013	LIFECWR TEAM	3	Animalia	Chordata	Aves	Anseriformes	Anatidae	Anas	crecca		Anas crecca	Linnaeus, 1758	Anas crecca Linnaeus, 1758	species	Sofia Goulart, Mariana R. Brito and Sónia Santos	2013
1412	FieldObservation	https://creativecommons.org/licenses/by/4.0/legalcode	UAc	0a80feca-b411-428a-a34e-c5c2fa07cdba	Birds from Praia da Vitória marshes (Terceira, Azores, Portugal)	ObservedSpecimen	Palearctic	Portugal	Azores	Terceira	Praia da Vitória	Paul da Pedreira do Cabo da Praia	38°42'15,538"N, 27°2'47,222"W	38.7043	-27.0465	WGS84	3	10	2013.12.16	2013	LIFECWR TEAM	1	Animalia	Chordata	Aves	Anseriformes	Anatidae	Anas	crecca		Anas crecca	Linnaeus, 1758	Anas crecca Linnaeus, 1758	species	Sofia Goulart, Mariana R. Brito and Sónia Santos	2013
1459	FieldObservation	https://creativecommons.org/licenses/by/4.0/legalcode	UAc	0a80feca-b411-428a-a34e-c5c2fa07cdba	Birds from Praia da Vitória marshes (Terceira, Azores, Portugal)	ObservedSpecimen	Palearctic	Portugal	Azores	Terceira	Praia da Vitória	Paul da Praia da Vitória	38°44'5.915"N, 27°3'36.131"W	38.735	-27.06	WGS84	6	10	2013.12.19	2013	LIFECWR TEAM	2	Animalia	Chordata	Aves	Anseriformes	Anatidae	Anas	crecca		Anas crecca	Linnaeus, 1758	Anas crecca Linnaeus, 1758	species	Sofia Goulart, Mariana R. Brito and Sónia Santos	2013
1495	FieldObservation	https://creativecommons.org/licenses/by/4.0/legalcode	UAc	0a80feca-b411-428a-a34e-c5c2fa07cdba	Birds from Praia da Vitória marshes (Terceira, Azores, Portugal)	ObservedSpecimen	Palearctic	Portugal	Azores	Terceira	Praia da Vitória	Paul da Pedreira do Cabo da Praia	38°42'15,538"N, 27°2'47,222"W	38.7043	-27.0465	WGS84	3	10	2013.12.20	2013	LIFECWR TEAM	3	Animalia	Chordata	Aves	Anseriformes	Anatidae	Anas	crecca		Anas crecca	Linnaeus, 1758	Anas crecca Linnaeus, 1758	species	Sofia Goulart, Mariana R. Brito and Sónia Santos	2013
1517	FieldObservation	https://creativecommons.org/licenses/by/4.0/legalcode	UAc	0a80feca-b411-428a-a34e-c5c2fa07cdba	Birds from Praia da Vitória marshes (Terceira, Azores, Portugal)	ObservedSpecimen	Palearctic	Portugal	Azores	Terceira	Praia da Vitória	Paul da Pedreira do Cabo da Praia	38°42'15,538"N, 27°2'47,222"W	38.7043	-27.0465	WGS84	3	10	2013.12.23	2013	LIFECWR TEAM	2	Animalia	Chordata	Aves	Anseriformes	Anatidae	Anas	crecca		Anas crecca	Linnaeus, 1758	Anas crecca Linnaeus, 1758	species	Sofia Goulart, Mariana R. Brito and Sónia Santos	2013
1538	FieldObservation	https://creativecommons.org/licenses/by/4.0/legalcode	UAc	0a80feca-b411-428a-a34e-c5c2fa07cdba	Birds from Praia da Vitória marshes (Terceira, Azores, Portugal)	ObservedSpecimen	Palearctic	Portugal	Azores	Terceira	Praia da Vitória	Paul da Praia da Vitória	38°44'5.915"N, 27°3'36.131"W	38.735	-27.06	WGS84	6	10	2013.12.30	2013	LIFECWR TEAM	1	Animalia	Chordata	Aves	Anseriformes	Anatidae	Anas	crecca		Anas crecca	Linnaeus, 1758	Anas crecca Linnaeus, 1758	species	Sofia Goulart, Mariana R. Brito and Sónia Santos	2013
1539	FieldObservation	https://creativecommons.org/licenses/by/4.0/legalcode	UAc	0a80feca-b411-428a-a34e-c5c2fa07cdba	Birds from Praia da Vitória marshes (Terceira, Azores, Portugal)	ObservedSpecimen	Palearctic	Portugal	Azores	Terceira	Praia da Vitória	Paul da Pedreira do Cabo da Praia	38°42'15,538"N, 27°2'47,222"W	38.7043	-27.0465	WGS84	3	10	2013.12.30	2013	LIFECWR TEAM	3	Animalia	Chordata	Aves	Anseriformes	Anatidae	Anas	crecca		Anas crecca	Linnaeus, 1758	Anas crecca Linnaeus, 1758	species	Sofia Goulart, Mariana R. Brito and Sónia Santos	2013
1582	FieldObservation	https://creativecommons.org/licenses/by/4.0/legalcode	UAc	0a80feca-b411-428a-a34e-c5c2fa07cdba	Birds from Praia da Vitória marshes (Terceira, Azores, Portugal)	ObservedSpecimen	Palearctic	Portugal	Azores	Terceira	Praia da Vitória	Paul da Praia da Vitória	38°44'5.915"N, 27°3'36.131"W	38.735	-27.06	WGS84	6	10	2013.12.6	2013	LIFECWR TEAM	1	Animalia	Chordata	Aves	Anseriformes	Anatidae	Anas	crecca		Anas crecca	Linnaeus, 1758	Anas crecca Linnaeus, 1758	species	Sofia Goulart, Mariana R. Brito and Sónia Santos	2013
1583	FieldObservation	https://creativecommons.org/licenses/by/4.0/legalcode	UAc	0a80feca-b411-428a-a34e-c5c2fa07cdba	Birds from Praia da Vitória marshes (Terceira, Azores, Portugal)	ObservedSpecimen	Palearctic	Portugal	Azores	Terceira	Praia da Vitória	Paul da Pedreira do Cabo da Praia	38°42'15,538"N, 27°2'47,222"W	38.7043	-27.0465	WGS84	3	10	2013.12.6	2013	LIFECWR TEAM	4	Animalia	Chordata	Aves	Anseriformes	Anatidae	Anas	crecca		Anas crecca	Linnaeus, 1758	Anas crecca Linnaeus, 1758	species	Sofia Goulart, Mariana R. Brito and Sónia Santos	2013
2118	FieldObservation	https://creativecommons.org/licenses/by/4.0/legalcode	UAc	0a80feca-b411-428a-a34e-c5c2fa07cdba	Birds from Praia da Vitória marshes (Terceira, Azores, Portugal)	ObservedSpecimen	Palearctic	Portugal	Azores	Terceira	Praia da Vitória	Paul da Pedreira do Cabo da Praia	38°42'15,538"N, 27°2'47,222"W	38.7043	-27.0465	WGS84	3	10	2014.1.15	2014	LIFECWR TEAM	5	Animalia	Chordata	Aves	Anseriformes	Anatidae	Anas	crecca		Anas crecca	Linnaeus, 1758	Anas crecca Linnaeus, 1758	species	Sofia Goulart, Mariana R. Brito and Sónia Santos	2014
2140	FieldObservation	https://creativecommons.org/licenses/by/4.0/legalcode	UAc	0a80feca-b411-428a-a34e-c5c2fa07cdba	Birds from Praia da Vitória marshes (Terceira, Azores, Portugal)	ObservedSpecimen	Palearctic	Portugal	Azores	Terceira	Praia da Vitória	Paul da Pedreira do Cabo da Praia	38°42'15,538"N, 27°2'47,222"W	38.7043	-27.0465	WGS84	3	10	2014.1.16	2014	LIFECWR TEAM	1	Animalia	Chordata	Aves	Anseriformes	Anatidae	Anas	crecca		Anas crecca	Linnaeus, 1758	Anas crecca Linnaeus, 1758	species	Sofia Goulart, Mariana R. Brito and Sónia Santos	2014
2156	FieldObservation	https://creativecommons.org/licenses/by/4.0/legalcode	UAc	0a80feca-b411-428a-a34e-c5c2fa07cdba	Birds from Praia da Vitória marshes (Terceira, Azores, Portugal)	ObservedSpecimen	Palearctic	Portugal	Azores	Terceira	Praia da Vitória	Paul da Pedreira do Cabo da Praia	38°42'15,538"N, 27°2'47,222"W	38.7043	-27.0465	WGS84	3	10	2014.1.2	2014	LIFECWR TEAM	3	Animalia	Chordata	Aves	Anseriformes	Anatidae	Anas	crecca		Anas crecca	Linnaeus, 1758	Anas crecca Linnaeus, 1758	species	Sofia Goulart, Mariana R. Brito and Sónia Santos	2014
2285	FieldObservation	https://creativecommons.org/licenses/by/4.0/legalcode	UAc	0a80feca-b411-428a-a34e-c5c2fa07cdba	Birds from Praia da Vitória marshes (Terceira, Azores, Portugal)	ObservedSpecimen	Palearctic	Portugal	Azores	Terceira	Praia da Vitória	Paul da Pedreira do Cabo da Praia	38°42'15,538"N, 27°2'47,222"W	38.7043	-27.0465	WGS84	3	10	2014.1.29	2014	LIFECWR TEAM	2	Animalia	Chordata	Aves	Anseriformes	Anatidae	Anas	crecca		Anas crecca	Linnaeus, 1758	Anas crecca Linnaeus, 1758	species	Sofia Goulart, Mariana R. Brito and Sónia Santos	2014
2489	FieldObservation	https://creativecommons.org/licenses/by/4.0/legalcode	UAc	0a80feca-b411-428a-a34e-c5c2fa07cdba	Birds from Praia da Vitória marshes (Terceira, Azores, Portugal)	ObservedSpecimen	Palearctic	Portugal	Azores	Terceira	Praia da Vitória	Paul da Pedreira do Cabo da Praia	38°42'15,538"N, 27°2'47,222"W	38.7043	-27.0465	WGS84	3	10	2014.10.21	2014	LIFECWR TEAM	2	Animalia	Chordata	Aves	Anseriformes	Anatidae	Anas	crecca		Anas crecca	Linnaeus, 1758	Anas crecca Linnaeus, 1758	species	Sofia Goulart, Mariana R. Brito and Sónia Santos	2014
2587	FieldObservation	https://creativecommons.org/licenses/by/4.0/legalcode	UAc	0a80feca-b411-428a-a34e-c5c2fa07cdba	Birds from Praia da Vitória marshes (Terceira, Azores, Portugal)	ObservedSpecimen	Palearctic	Portugal	Azores	Terceira	Praia da Vitória	Paul da Pedreira do Cabo da Praia	38°42'15,538"N, 27°2'47,222"W	38.7043	-27.0465	WGS84	3	10	2014.10.27	2014	LIFECWR TEAM	3	Animalia	Chordata	Aves	Anseriformes	Anatidae	Anas	crecca		Anas crecca	Linnaeus, 1758	Anas crecca Linnaeus, 1758	species	Sofia Goulart, Mariana R. Brito and Sónia Santos	2014
2618	FieldObservation	https://creativecommons.org/licenses/by/4.0/legalcode	UAc	0a80feca-b411-428a-a34e-c5c2fa07cdba	Birds from Praia da Vitória marshes (Terceira, Azores, Portugal)	ObservedSpecimen	Palearctic	Portugal	Azores	Terceira	Praia da Vitória	Paul da Pedreira do Cabo da Praia	38°42'15,538"N, 27°2'47,222"W	38.7043	-27.0465	WGS84	3	10	2014.10.28	2014	LIFECWR TEAM	2	Animalia	Chordata	Aves	Anseriformes	Anatidae	Anas	crecca		Anas crecca	Linnaeus, 1758	Anas crecca Linnaeus, 1758	species	Sofia Goulart, Mariana R. Brito and Sónia Santos	2014
2659	FieldObservation	https://creativecommons.org/licenses/by/4.0/legalcode	UAc	0a80feca-b411-428a-a34e-c5c2fa07cdba	Birds from Praia da Vitória marshes (Terceira, Azores, Portugal)	ObservedSpecimen	Palearctic	Portugal	Azores	Terceira	Praia da Vitória	Paul da Pedreira do Cabo da Praia	38°42'15,538"N, 27°2'47,222"W	38.7043	-27.0465	WGS84	3	10	2014.10.31	2014	LIFECWR TEAM	2	Animalia	Chordata	Aves	Anseriformes	Anatidae	Anas	crecca		Anas crecca	Linnaeus, 1758	Anas crecca Linnaeus, 1758	species	Sofia Goulart, Mariana R. Brito and Sónia Santos	2014
2718	FieldObservation	https://creativecommons.org/licenses/by/4.0/legalcode	UAc	0a80feca-b411-428a-a34e-c5c2fa07cdba	Birds from Praia da Vitória marshes (Terceira, Azores, Portugal)	ObservedSpecimen	Palearctic	Portugal	Azores	Terceira	Praia da Vitória	Paul da Pedreira do Cabo da Praia	38°42'15,538"N, 27°2'47,222"W	38.7043	-27.0465	WGS84	3	10	2014.11.10	2014	LIFECWR TEAM	4	Animalia	Chordata	Aves	Anseriformes	Anatidae	Anas	crecca		Anas crecca	Linnaeus, 1758	Anas crecca Linnaeus, 1758	species	Sofia Goulart, Mariana R. Brito and Sónia Santos	2014
2804	FieldObservation	https://creativecommons.org/licenses/by/4.0/legalcode	UAc	0a80feca-b411-428a-a34e-c5c2fa07cdba	Birds from Praia da Vitória marshes (Terceira, Azores, Portugal)	ObservedSpecimen	Palearctic	Portugal	Azores	Terceira	Praia da Vitória	Paul da Pedreira do Cabo da Praia	38°42'15,538"N, 27°2'47,222"W	38.7043	-27.0465	WGS84	3	10	2014.11.14	2014	LIFECWR TEAM	9	Animalia	Chordata	Aves	Anseriformes	Anatidae	Anas	crecca		Anas crecca	Linnaeus, 1758	Anas crecca Linnaeus, 1758	species	Sofia Goulart, Mariana R. Brito and Sónia Santos	2014
2870	FieldObservation	https://creativecommons.org/licenses/by/4.0/legalcode	UAc	0a80feca-b411-428a-a34e-c5c2fa07cdba	Birds from Praia da Vitória marshes (Terceira, Azores, Portugal)	ObservedSpecimen	Palearctic	Portugal	Azores	Terceira	Praia da Vitória	Paul da Pedreira do Cabo da Praia	38°42'15,538"N, 27°2'47,222"W	38.7043	-27.0465	WGS84	3	10	2014.11.3	2014	LIFECWR TEAM	4	Animalia	Chordata	Aves	Anseriformes	Anatidae	Anas	crecca		Anas crecca	Linnaeus, 1758	Anas crecca Linnaeus, 1758	species	Sofia Goulart, Mariana R. Brito and Sónia Santos	2014
2891	FieldObservation	https://creativecommons.org/licenses/by/4.0/legalcode	UAc	0a80feca-b411-428a-a34e-c5c2fa07cdba	Birds from Praia da Vitória marshes (Terceira, Azores, Portugal)	ObservedSpecimen	Palearctic	Portugal	Azores	Terceira	Praia da Vitória	Paul da Pedreira do Cabo da Praia	38°42'15,538"N, 27°2'47,222"W	38.7043	-27.0465	WGS84	3	10	2014.11.4	2014	LIFECWR TEAM	4	Animalia	Chordata	Aves	Anseriformes	Anatidae	Anas	crecca		Anas crecca	Linnaeus, 1758	Anas crecca Linnaeus, 1758	species	Sofia Goulart, Mariana R. Brito and Sónia Santos	2014
2914	FieldObservation	https://creativecommons.org/licenses/by/4.0/legalcode	UAc	0a80feca-b411-428a-a34e-c5c2fa07cdba	Birds from Praia da Vitória marshes (Terceira, Azores, Portugal)	ObservedSpecimen	Palearctic	Portugal	Azores	Terceira	Praia da Vitória	Paul da Pedreira do Cabo da Praia	38°42'15,538"N, 27°2'47,222"W	38.7043	-27.0465	WGS84	3	10	2014.11.5	2014	LIFECWR TEAM	4	Animalia	Chordata	Aves	Anseriformes	Anatidae	Anas	crecca		Anas crecca	Linnaeus, 1758	Anas crecca Linnaeus, 1758	species	Sofia Goulart, Mariana R. Brito and Sónia Santos	2014
2964	FieldObservation	https://creativecommons.org/licenses/by/4.0/legalcode	UAc	0a80feca-b411-428a-a34e-c5c2fa07cdba	Birds from Praia da Vitória marshes (Terceira, Azores, Portugal)	ObservedSpecimen	Palearctic	Portugal	Azores	Terceira	Praia da Vitória	Paul da Pedreira do Cabo da Praia	38°42'15,538"N, 27°2'47,222"W	38.7043	-27.0465	WGS84	3	10	2014.12.4	2014	LIFECWR TEAM	3	Animalia	Chordata	Aves	Anseriformes	Anatidae	Anas	crecca		Anas crecca	Linnaeus, 1758	Anas crecca Linnaeus, 1758	species	Sofia Goulart, Mariana R. Brito and Sónia Santos	2014
3223	FieldObservation	https://creativecommons.org/licenses/by/4.0/legalcode	UAc	0a80feca-b411-428a-a34e-c5c2fa07cdba	Birds from Praia da Vitória marshes (Terceira, Azores, Portugal)	ObservedSpecimen	Palearctic	Portugal	Azores	Terceira	Praia da Vitória	Paul da Praia da Vitória	38°44'5.915"N, 27°3'36.131"W	38.735	-27.06	WGS84	6	10	2014.2.4	2014	LIFECWR TEAM	2	Animalia	Chordata	Aves	Anseriformes	Anatidae	Anas	crecca		Anas crecca	Linnaeus, 1758	Anas crecca Linnaeus, 1758	species	Sofia Goulart, Mariana R. Brito and Sónia Santos	2014
5235	FieldObservation	https://creativecommons.org/licenses/by/4.0/legalcode	UAc	0a80feca-b411-428a-a34e-c5c2fa07cdba	Birds from Praia da Vitória marshes (Terceira, Azores, Portugal)	ObservedSpecimen	Palearctic	Portugal	Azores	Terceira	Praia da Vitória	Paul da Pedreira do Cabo da Praia	38°42'15,538"N, 27°2'47,222"W	38.7043	-27.0465	WGS84	3	10	2015.10.7	2015	LIFECWR TEAM	1	Animalia	Chordata	Aves	Anseriformes	Anatidae	Anas	crecca		Anas crecca	Linnaeus, 1758	Anas crecca Linnaeus, 1758	species	Sofia Goulart, Mariana R. Brito and Sónia Santos	2015
5263	FieldObservation	https://creativecommons.org/licenses/by/4.0/legalcode	UAc	0a80feca-b411-428a-a34e-c5c2fa07cdba	Birds from Praia da Vitória marshes (Terceira, Azores, Portugal)	ObservedSpecimen	Palearctic	Portugal	Azores	Terceira	Praia da Vitória	Paul da Pedreira do Cabo da Praia	38°42'15,538"N, 27°2'47,222"W	38.7043	-27.0465	WGS84	3	10	2015.10.8	2015	LIFECWR TEAM	1	Animalia	Chordata	Aves	Anseriformes	Anatidae	Anas	crecca		Anas crecca	Linnaeus, 1758	Anas crecca Linnaeus, 1758	species	Sofia Goulart, Mariana R. Brito and Sónia Santos	2015
5283	FieldObservation	https://creativecommons.org/licenses/by/4.0/legalcode	UAc	0a80feca-b411-428a-a34e-c5c2fa07cdba	Birds from Praia da Vitória marshes (Terceira, Azores, Portugal)	ObservedSpecimen	Palearctic	Portugal	Azores	Terceira	Praia da Vitória	Paul da Pedreira do Cabo da Praia	38°42'15,538"N, 27°2'47,222"W	38.7043	-27.0465	WGS84	3	10	2015.10.9	2015	LIFECWR TEAM	1	Animalia	Chordata	Aves	Anseriformes	Anatidae	Anas	crecca		Anas crecca	Linnaeus, 1758	Anas crecca Linnaeus, 1758	species	Sofia Goulart, Mariana R. Brito and Sónia Santos	2015
5372	FieldObservation	https://creativecommons.org/licenses/by/4.0/legalcode	UAc	0a80feca-b411-428a-a34e-c5c2fa07cdba	Birds from Praia da Vitória marshes (Terceira, Azores, Portugal)	ObservedSpecimen	Palearctic	Portugal	Azores	Terceira	Praia da Vitória	Paul da Pedreira do Cabo da Praia	38°42'15,538"N, 27°2'47,222"W	38.7043	-27.0465	WGS84	3	10	2015.11.17	2015	LIFECWR TEAM	2	Animalia	Chordata	Aves	Anseriformes	Anatidae	Anas	crecca		Anas crecca	Linnaeus, 1758	Anas crecca Linnaeus, 1758	species	Sofia Goulart, Mariana R. Brito and Sónia Santos	2015
5495	FieldObservation	https://creativecommons.org/licenses/by/4.0/legalcode	UAc	0a80feca-b411-428a-a34e-c5c2fa07cdba	Birds from Praia da Vitória marshes (Terceira, Azores, Portugal)	ObservedSpecimen	Palearctic	Portugal	Azores	Terceira	Praia da Vitória	Paul da Pedreira do Cabo da Praia	38°42'15,538"N, 27°2'47,222"W	38.7043	-27.0465	WGS84	3	10	2015.11.25	2015	LIFECWR TEAM	1	Animalia	Chordata	Aves	Anseriformes	Anatidae	Anas	crecca		Anas crecca	Linnaeus, 1758	Anas crecca Linnaeus, 1758	species	Sofia Goulart, Mariana R. Brito and Sónia Santos	2015
5496	FieldObservation	https://creativecommons.org/licenses/by/4.0/legalcode	UAc	0a80feca-b411-428a-a34e-c5c2fa07cdba	Birds from Praia da Vitória marshes (Terceira, Azores, Portugal)	ObservedSpecimen	Palearctic	Portugal	Azores	Terceira	Praia da Vitória	Paul da Praia da Vitória	38°44'5.915"N, 27°3'36.131"W	38.735	-27.06	WGS84	6	10	2015.11.25	2015	LIFECWR TEAM	2	Animalia	Chordata	Aves	Anseriformes	Anatidae	Anas	crecca		Anas crecca	Linnaeus, 1758	Anas crecca Linnaeus, 1758	species	Sofia Goulart, Mariana R. Brito and Sónia Santos	2015
5520	FieldObservation	https://creativecommons.org/licenses/by/4.0/legalcode	UAc	0a80feca-b411-428a-a34e-c5c2fa07cdba	Birds from Praia da Vitória marshes (Terceira, Azores, Portugal)	ObservedSpecimen	Palearctic	Portugal	Azores	Terceira	Praia da Vitória	Paul da Pedreira do Cabo da Praia	38°42'15,538"N, 27°2'47,222"W	38.7043	-27.0465	WGS84	3	10	2015.11.26	2015	LIFECWR TEAM	1	Animalia	Chordata	Aves	Anseriformes	Anatidae	Anas	crecca		Anas crecca	Linnaeus, 1758	Anas crecca Linnaeus, 1758	species	Sofia Goulart, Mariana R. Brito and Sónia Santos	2015
5521	FieldObservation	https://creativecommons.org/licenses/by/4.0/legalcode	UAc	0a80feca-b411-428a-a34e-c5c2fa07cdba	Birds from Praia da Vitória marshes (Terceira, Azores, Portugal)	ObservedSpecimen	Palearctic	Portugal	Azores	Terceira	Praia da Vitória	Paul da Praia da Vitória	38°44'5.915"N, 27°3'36.131"W	38.735	-27.06	WGS84	6	10	2015.11.26	2015	LIFECWR TEAM	1	Animalia	Chordata	Aves	Anseriformes	Anatidae	Anas	crecca		Anas crecca	Linnaeus, 1758	Anas crecca Linnaeus, 1758	species	Sofia Goulart, Mariana R. Brito and Sónia Santos	2015
5541	FieldObservation	https://creativecommons.org/licenses/by/4.0/legalcode	UAc	0a80feca-b411-428a-a34e-c5c2fa07cdba	Birds from Praia da Vitória marshes (Terceira, Azores, Portugal)	ObservedSpecimen	Palearctic	Portugal	Azores	Terceira	Praia da Vitória	Paul da Pedreira do Cabo da Praia	38°42'15,538"N, 27°2'47,222"W	38.7043	-27.0465	WGS84	3	10	2015.11.27	2015	LIFECWR TEAM	1	Animalia	Chordata	Aves	Anseriformes	Anatidae	Anas	crecca		Anas crecca	Linnaeus, 1758	Anas crecca Linnaeus, 1758	species	Sofia Goulart, Mariana R. Brito and Sónia Santos	2015
5584	FieldObservation	https://creativecommons.org/licenses/by/4.0/legalcode	UAc	0a80feca-b411-428a-a34e-c5c2fa07cdba	Birds from Praia da Vitória marshes (Terceira, Azores, Portugal)	ObservedSpecimen	Palearctic	Portugal	Azores	Terceira	Praia da Vitória	Paul da Pedreira do Cabo da Praia	38°42'15,538"N, 27°2'47,222"W	38.7043	-27.0465	WGS84	3	10	2015.11.30	2015	LIFECWR TEAM	1	Animalia	Chordata	Aves	Anseriformes	Anatidae	Anas	crecca		Anas crecca	Linnaeus, 1758	Anas crecca Linnaeus, 1758	species	Sofia Goulart, Mariana R. Brito and Sónia Santos	2015
5676	FieldObservation	https://creativecommons.org/licenses/by/4.0/legalcode	UAc	0a80feca-b411-428a-a34e-c5c2fa07cdba	Birds from Praia da Vitória marshes (Terceira, Azores, Portugal)	ObservedSpecimen	Palearctic	Portugal	Azores	Terceira	Praia da Vitória	Paul da Pedreira do Cabo da Praia	38°42'15,538"N, 27°2'47,222"W	38.7043	-27.0465	WGS84	3	10	2015.12.1	2015	LIFECWR TEAM	1	Animalia	Chordata	Aves	Anseriformes	Anatidae	Anas	crecca		Anas crecca	Linnaeus, 1758	Anas crecca Linnaeus, 1758	species	Sofia Goulart, Mariana R. Brito and Sónia Santos	2015
5705	FieldObservation	https://creativecommons.org/licenses/by/4.0/legalcode	UAc	0a80feca-b411-428a-a34e-c5c2fa07cdba	Birds from Praia da Vitória marshes (Terceira, Azores, Portugal)	ObservedSpecimen	Palearctic	Portugal	Azores	Terceira	Praia da Vitória	Paul da Pedreira do Cabo da Praia	38°42'15,538"N, 27°2'47,222"W	38.7043	-27.0465	WGS84	3	10	2015.12.10	2015	LIFECWR TEAM	2	Animalia	Chordata	Aves	Anseriformes	Anatidae	Anas	crecca		Anas crecca	Linnaeus, 1758	Anas crecca Linnaeus, 1758	species	Sofia Goulart, Mariana R. Brito and Sónia Santos	2015
5706	FieldObservation	https://creativecommons.org/licenses/by/4.0/legalcode	UAc	0a80feca-b411-428a-a34e-c5c2fa07cdba	Birds from Praia da Vitória marshes (Terceira, Azores, Portugal)	ObservedSpecimen	Palearctic	Portugal	Azores	Terceira	Praia da Vitória	Paul da Praia da Vitória	38°44'5.915"N, 27°3'36.131"W	38.735	-27.06	WGS84	6	10	2015.12.10	2015	LIFECWR TEAM	2	Animalia	Chordata	Aves	Anseriformes	Anatidae	Anas	crecca		Anas crecca	Linnaeus, 1758	Anas crecca Linnaeus, 1758	species	Sofia Goulart, Mariana R. Brito and Sónia Santos	2015
5738	FieldObservation	https://creativecommons.org/licenses/by/4.0/legalcode	UAc	0a80feca-b411-428a-a34e-c5c2fa07cdba	Birds from Praia da Vitória marshes (Terceira, Azores, Portugal)	ObservedSpecimen	Palearctic	Portugal	Azores	Terceira	Praia da Vitória	Paul da Praia da Vitória	38°44'5.915"N, 27°3'36.131"W	38.735	-27.06	WGS84	6	10	2015.12.11	2015	LIFECWR TEAM	2	Animalia	Chordata	Aves	Anseriformes	Anatidae	Anas	crecca		Anas crecca	Linnaeus, 1758	Anas crecca Linnaeus, 1758	species	Sofia Goulart, Mariana R. Brito and Sónia Santos	2015
5750	FieldObservation	https://creativecommons.org/licenses/by/4.0/legalcode	UAc	0a80feca-b411-428a-a34e-c5c2fa07cdba	Birds from Praia da Vitória marshes (Terceira, Azores, Portugal)	ObservedSpecimen	Palearctic	Portugal	Azores	Terceira	Praia da Vitória	Paul da Praia da Vitória	38°44'5.915"N, 27°3'36.131"W	38.735	-27.06	WGS84	6	10	2015.12.14	2015	LIFECWR TEAM	1	Animalia	Chordata	Aves	Anseriformes	Anatidae	Anas	crecca		Anas crecca	Linnaeus, 1758	Anas crecca Linnaeus, 1758	species	Sofia Goulart, Mariana R. Brito and Sónia Santos	2015
5811	FieldObservation	https://creativecommons.org/licenses/by/4.0/legalcode	UAc	0a80feca-b411-428a-a34e-c5c2fa07cdba	Birds from Praia da Vitória marshes (Terceira, Azores, Portugal)	ObservedSpecimen	Palearctic	Portugal	Azores	Terceira	Praia da Vitória	Paul da Pedreira do Cabo da Praia	38°42'15,538"N, 27°2'47,222"W	38.7043	-27.0465	WGS84	3	10	2015.12.2	2015	LIFECWR TEAM	2	Animalia	Chordata	Aves	Anseriformes	Anatidae	Anas	crecca		Anas crecca	Linnaeus, 1758	Anas crecca Linnaeus, 1758	species	Sofia Goulart, Mariana R. Brito and Sónia Santos	2015
5812	FieldObservation	https://creativecommons.org/licenses/by/4.0/legalcode	UAc	0a80feca-b411-428a-a34e-c5c2fa07cdba	Birds from Praia da Vitória marshes (Terceira, Azores, Portugal)	ObservedSpecimen	Palearctic	Portugal	Azores	Terceira	Praia da Vitória	Paul da Praia da Vitória	38°44'5.915"N, 27°3'36.131"W	38.735	-27.06	WGS84	6	10	2015.12.2	2015	LIFECWR TEAM	2	Animalia	Chordata	Aves	Anseriformes	Anatidae	Anas	crecca		Anas crecca	Linnaeus, 1758	Anas crecca Linnaeus, 1758	species	Sofia Goulart, Mariana R. Brito and Sónia Santos	2015
5852	FieldObservation	https://creativecommons.org/licenses/by/4.0/legalcode	UAc	0a80feca-b411-428a-a34e-c5c2fa07cdba	Birds from Praia da Vitória marshes (Terceira, Azores, Portugal)	ObservedSpecimen	Palearctic	Portugal	Azores	Terceira	Praia da Vitória	Paul da Pedreira do Cabo da Praia	38°42'15,538"N, 27°2'47,222"W	38.7043	-27.0465	WGS84	3	10	2015.12.22	2015	LIFECWR TEAM	1	Animalia	Chordata	Aves	Anseriformes	Anatidae	Anas	crecca		Anas crecca	Linnaeus, 1758	Anas crecca Linnaeus, 1758	species	Sofia Goulart, Mariana R. Brito and Sónia Santos	2015
5927	FieldObservation	https://creativecommons.org/licenses/by/4.0/legalcode	UAc	0a80feca-b411-428a-a34e-c5c2fa07cdba	Birds from Praia da Vitória marshes (Terceira, Azores, Portugal)	ObservedSpecimen	Palearctic	Portugal	Azores	Terceira	Praia da Vitória	Paul da Praia da Vitória	38°44'5.915"N, 27°3'36.131"W	38.735	-27.06	WGS84	6	10	2015.12.3	2015	LIFECWR TEAM	1	Animalia	Chordata	Aves	Anseriformes	Anatidae	Anas	crecca		Anas crecca	Linnaeus, 1758	Anas crecca Linnaeus, 1758	species	Sofia Goulart, Mariana R. Brito and Sónia Santos	2015
5928	FieldObservation	https://creativecommons.org/licenses/by/4.0/legalcode	UAc	0a80feca-b411-428a-a34e-c5c2fa07cdba	Birds from Praia da Vitória marshes (Terceira, Azores, Portugal)	ObservedSpecimen	Palearctic	Portugal	Azores	Terceira	Praia da Vitória	Paul da Pedreira do Cabo da Praia	38°42'15,538"N, 27°2'47,222"W	38.7043	-27.0465	WGS84	3	10	2015.12.3	2015	LIFECWR TEAM	2	Animalia	Chordata	Aves	Anseriformes	Anatidae	Anas	crecca		Anas crecca	Linnaeus, 1758	Anas crecca Linnaeus, 1758	species	Sofia Goulart, Mariana R. Brito and Sónia Santos	2015
6012	FieldObservation	https://creativecommons.org/licenses/by/4.0/legalcode	UAc	0a80feca-b411-428a-a34e-c5c2fa07cdba	Birds from Praia da Vitória marshes (Terceira, Azores, Portugal)	ObservedSpecimen	Palearctic	Portugal	Azores	Terceira	Praia da Vitória	Paul da Pedreira do Cabo da Praia	38°42'15,538"N, 27°2'47,222"W	38.7043	-27.0465	WGS84	3	10	2015.12.7	2015	LIFECWR TEAM	2	Animalia	Chordata	Aves	Anseriformes	Anatidae	Anas	crecca		Anas crecca	Linnaeus, 1758	Anas crecca Linnaeus, 1758	species	Sofia Goulart, Mariana R. Brito and Sónia Santos	2015
6045	FieldObservation	https://creativecommons.org/licenses/by/4.0/legalcode	UAc	0a80feca-b411-428a-a34e-c5c2fa07cdba	Birds from Praia da Vitória marshes (Terceira, Azores, Portugal)	ObservedSpecimen	Palearctic	Portugal	Azores	Terceira	Praia da Vitória	Paul da Pedreira do Cabo da Praia	38°42'15,538"N, 27°2'47,222"W	38.7043	-27.0465	WGS84	3	10	2015.12.9	2015	LIFECWR TEAM	1	Animalia	Chordata	Aves	Anseriformes	Anatidae	Anas	crecca		Anas crecca	Linnaeus, 1758	Anas crecca Linnaeus, 1758	species	Sofia Goulart, Mariana R. Brito and Sónia Santos	2015
7338	FieldObservation	https://creativecommons.org/licenses/by/4.0/legalcode	UAc	0a80feca-b411-428a-a34e-c5c2fa07cdba	Birds from Praia da Vitória marshes (Terceira, Azores, Portugal)	ObservedSpecimen	Palearctic	Portugal	Azores	Terceira	Praia da Vitória	Paul da Pedreira do Cabo da Praia	38°42'15,538"N, 27°2'47,222"W	38.7043	-27.0465	WGS84	3	10	2015.9.18	2015	LIFECWR TEAM	3	Animalia	Chordata	Aves	Anseriformes	Anatidae	Anas	crecca		Anas crecca	Linnaeus, 1758	Anas crecca Linnaeus, 1758	species	Sofia Goulart, Mariana R. Brito and Sónia Santos	2015
7362	FieldObservation	https://creativecommons.org/licenses/by/4.0/legalcode	UAc	0a80feca-b411-428a-a34e-c5c2fa07cdba	Birds from Praia da Vitória marshes (Terceira, Azores, Portugal)	ObservedSpecimen	Palearctic	Portugal	Azores	Terceira	Praia da Vitória	Paul da Pedreira do Cabo da Praia	38°42'15,538"N, 27°2'47,222"W	38.7043	-27.0465	WGS84	3	10	2015.9.21	2015	LIFECWR TEAM	3	Animalia	Chordata	Aves	Anseriformes	Anatidae	Anas	crecca		Anas crecca	Linnaeus, 1758	Anas crecca Linnaeus, 1758	species	Sofia Goulart, Mariana R. Brito and Sónia Santos	2015
7389	FieldObservation	https://creativecommons.org/licenses/by/4.0/legalcode	UAc	0a80feca-b411-428a-a34e-c5c2fa07cdba	Birds from Praia da Vitória marshes (Terceira, Azores, Portugal)	ObservedSpecimen	Palearctic	Portugal	Azores	Terceira	Praia da Vitória	Paul da Pedreira do Cabo da Praia	38°42'15,538"N, 27°2'47,222"W	38.7043	-27.0465	WGS84	3	10	2015.9.22	2015	LIFECWR TEAM	3	Animalia	Chordata	Aves	Anseriformes	Anatidae	Anas	crecca		Anas crecca	Linnaeus, 1758	Anas crecca Linnaeus, 1758	species	Sofia Goulart, Mariana R. Brito and Sónia Santos	2015
7411	FieldObservation	https://creativecommons.org/licenses/by/4.0/legalcode	UAc	0a80feca-b411-428a-a34e-c5c2fa07cdba	Birds from Praia da Vitória marshes (Terceira, Azores, Portugal)	ObservedSpecimen	Palearctic	Portugal	Azores	Terceira	Praia da Vitória	Paul da Pedreira do Cabo da Praia	38°42'15,538"N, 27°2'47,222"W	38.7043	-27.0465	WGS84	3	10	2015.9.23	2015	LIFECWR TEAM	1	Animalia	Chordata	Aves	Anseriformes	Anatidae	Anas	crecca		Anas crecca	Linnaeus, 1758	Anas crecca Linnaeus, 1758	species	Sofia Goulart, Mariana R. Brito and Sónia Santos	2015
7432	FieldObservation	https://creativecommons.org/licenses/by/4.0/legalcode	UAc	0a80feca-b411-428a-a34e-c5c2fa07cdba	Birds from Praia da Vitória marshes (Terceira, Azores, Portugal)	ObservedSpecimen	Palearctic	Portugal	Azores	Terceira	Praia da Vitória	Paul da Pedreira do Cabo da Praia	38°42'15,538"N, 27°2'47,222"W	38.7043	-27.0465	WGS84	3	10	2015.9.24	2015	LIFECWR TEAM	3	Animalia	Chordata	Aves	Anseriformes	Anatidae	Anas	crecca		Anas crecca	Linnaeus, 1758	Anas crecca Linnaeus, 1758	species	Sofia Goulart, Mariana R. Brito and Sónia Santos	2015
7453	FieldObservation	https://creativecommons.org/licenses/by/4.0/legalcode	UAc	0a80feca-b411-428a-a34e-c5c2fa07cdba	Birds from Praia da Vitória marshes (Terceira, Azores, Portugal)	ObservedSpecimen	Palearctic	Portugal	Azores	Terceira	Praia da Vitória	Paul da Pedreira do Cabo da Praia	38°42'15,538"N, 27°2'47,222"W	38.7043	-27.0465	WGS84	3	10	2015.9.25	2015	LIFECWR TEAM	3	Animalia	Chordata	Aves	Anseriformes	Anatidae	Anas	crecca		Anas crecca	Linnaeus, 1758	Anas crecca Linnaeus, 1758	species	Sofia Goulart, Mariana R. Brito and Sónia Santos	2015
7645	FieldObservation	https://creativecommons.org/licenses/by/4.0/legalcode	UAc	0a80feca-b411-428a-a34e-c5c2fa07cdba	Birds from Praia da Vitória marshes (Terceira, Azores, Portugal)	ObservedSpecimen	Palearctic	Portugal	Azores	Terceira	Praia da Vitória	Paul da Praia da Vitória	38°44'5.915"N, 27°3'36.131"W	38.735	-27.06	WGS84	6	10	2016.1.13	2016	LIFECWR TEAM	1	Animalia	Chordata	Aves	Anseriformes	Anatidae	Anas	crecca		Anas crecca	Linnaeus, 1758	Anas crecca Linnaeus, 1758	species	Sofia Goulart, Mariana R. Brito and Sónia Santos	2016
7670	FieldObservation	https://creativecommons.org/licenses/by/4.0/legalcode	UAc	0a80feca-b411-428a-a34e-c5c2fa07cdba	Birds from Praia da Vitória marshes (Terceira, Azores, Portugal)	ObservedSpecimen	Palearctic	Portugal	Azores	Terceira	Praia da Vitória	Paul da Praia da Vitória	38°44'5.915"N, 27°3'36.131"W	38.735	-27.06	WGS84	6	10	2016.1.14	2016	LIFECWR TEAM	1	Animalia	Chordata	Aves	Anseriformes	Anatidae	Anas	crecca		Anas crecca	Linnaeus, 1758	Anas crecca Linnaeus, 1758	species	Sofia Goulart, Mariana R. Brito and Sónia Santos	2016
7718	FieldObservation	https://creativecommons.org/licenses/by/4.0/legalcode	UAc	0a80feca-b411-428a-a34e-c5c2fa07cdba	Birds from Praia da Vitória marshes (Terceira, Azores, Portugal)	ObservedSpecimen	Palearctic	Portugal	Azores	Terceira	Praia da Vitória	Paul da Praia da Vitória	38°44'5.915"N, 27°3'36.131"W	38.735	-27.06	WGS84	6	10	2016.1.19	2016	LIFECWR TEAM	1	Animalia	Chordata	Aves	Anseriformes	Anatidae	Anas	crecca		Anas crecca	Linnaeus, 1758	Anas crecca Linnaeus, 1758	species	Sofia Goulart, Mariana R. Brito and Sónia Santos	2016
7728	FieldObservation	https://creativecommons.org/licenses/by/4.0/legalcode	UAc	0a80feca-b411-428a-a34e-c5c2fa07cdba	Birds from Praia da Vitória marshes (Terceira, Azores, Portugal)	ObservedSpecimen	Palearctic	Portugal	Azores	Terceira	Praia da Vitória	Paul da Praia da Vitória	38°44'5.915"N, 27°3'36.131"W	38.735	-27.06	WGS84	6	10	2016.1.20	2016	LIFECWR TEAM	1	Animalia	Chordata	Aves	Anseriformes	Anatidae	Anas	crecca		Anas crecca	Linnaeus, 1758	Anas crecca Linnaeus, 1758	species	Sofia Goulart, Mariana R. Brito and Sónia Santos	2016
7758	FieldObservation	https://creativecommons.org/licenses/by/4.0/legalcode	UAc	0a80feca-b411-428a-a34e-c5c2fa07cdba	Birds from Praia da Vitória marshes (Terceira, Azores, Portugal)	ObservedSpecimen	Palearctic	Portugal	Azores	Terceira	Praia da Vitória	Paul da Praia da Vitória	38°44'5.915"N, 27°3'36.131"W	38.735	-27.06	WGS84	6	10	2016.1.22	2016	LIFECWR TEAM	1	Animalia	Chordata	Aves	Anseriformes	Anatidae	Anas	crecca		Anas crecca	Linnaeus, 1758	Anas crecca Linnaeus, 1758	species	Sofia Goulart, Mariana R. Brito and Sónia Santos	2016
7883	FieldObservation	https://creativecommons.org/licenses/by/4.0/legalcode	UAc	0a80feca-b411-428a-a34e-c5c2fa07cdba	Birds from Praia da Vitória marshes (Terceira, Azores, Portugal)	ObservedSpecimen	Palearctic	Portugal	Azores	Terceira	Praia da Vitória	Paul da Praia da Vitória	38°44'5.915"N, 27°3'36.131"W	38.735	-27.06	WGS84	6	10	2016.1.29	2016	LIFECWR TEAM	1	Animalia	Chordata	Aves	Anseriformes	Anatidae	Anas	crecca		Anas crecca	Linnaeus, 1758	Anas crecca Linnaeus, 1758	species	Sofia Goulart, Mariana R. Brito and Sónia Santos	2016
7912	FieldObservation	https://creativecommons.org/licenses/by/4.0/legalcode	UAc	0a80feca-b411-428a-a34e-c5c2fa07cdba	Birds from Praia da Vitória marshes (Terceira, Azores, Portugal)	ObservedSpecimen	Palearctic	Portugal	Azores	Terceira	Praia da Vitória	Paul da Praia da Vitória	38°44'5.915"N, 27°3'36.131"W	38.735	-27.06	WGS84	6	10	2016.1.4	2016	LIFECWR TEAM	1	Animalia	Chordata	Aves	Anseriformes	Anatidae	Anas	crecca		Anas crecca	Linnaeus, 1758	Anas crecca Linnaeus, 1758	species	Sofia Goulart, Mariana R. Brito and Sónia Santos	2016
7934	FieldObservation	https://creativecommons.org/licenses/by/4.0/legalcode	UAc	0a80feca-b411-428a-a34e-c5c2fa07cdba	Birds from Praia da Vitória marshes (Terceira, Azores, Portugal)	ObservedSpecimen	Palearctic	Portugal	Azores	Terceira	Praia da Vitória	Paul da Praia da Vitória	38°44'5.915"N, 27°3'36.131"W	38.735	-27.06	WGS84	6	10	2016.1.5	2016	LIFECWR TEAM	2	Animalia	Chordata	Aves	Anseriformes	Anatidae	Anas	crecca		Anas crecca	Linnaeus, 1758	Anas crecca Linnaeus, 1758	species	Sofia Goulart, Mariana R. Brito and Sónia Santos	2016
7990	FieldObservation	https://creativecommons.org/licenses/by/4.0/legalcode	UAc	0a80feca-b411-428a-a34e-c5c2fa07cdba	Birds from Praia da Vitória marshes (Terceira, Azores, Portugal)	ObservedSpecimen	Palearctic	Portugal	Azores	Terceira	Praia da Vitória	Paul da Pedreira do Cabo da Praia	38°42'15,538"N, 27°2'47,222"W	38.7043	-27.0465	WGS84	3	10	2016.1.7	2016	LIFECWR TEAM	1	Animalia	Chordata	Aves	Anseriformes	Anatidae	Anas	crecca		Anas crecca	Linnaeus, 1758	Anas crecca Linnaeus, 1758	species	Sofia Goulart, Mariana R. Brito and Sónia Santos	2016
7991	FieldObservation	https://creativecommons.org/licenses/by/4.0/legalcode	UAc	0a80feca-b411-428a-a34e-c5c2fa07cdba	Birds from Praia da Vitória marshes (Terceira, Azores, Portugal)	ObservedSpecimen	Palearctic	Portugal	Azores	Terceira	Praia da Vitória	Paul da Praia da Vitória	38°44'5.915"N, 27°3'36.131"W	38.735	-27.06	WGS84	6	10	2016.1.7	2016	LIFECWR TEAM	1	Animalia	Chordata	Aves	Anseriformes	Anatidae	Anas	crecca		Anas crecca	Linnaeus, 1758	Anas crecca Linnaeus, 1758	species	Sofia Goulart, Mariana R. Brito and Sónia Santos	2016
8041	FieldObservation	https://creativecommons.org/licenses/by/4.0/legalcode	UAc	0a80feca-b411-428a-a34e-c5c2fa07cdba	Birds from Praia da Vitória marshes (Terceira, Azores, Portugal)	ObservedSpecimen	Palearctic	Portugal	Azores	Terceira	Praia da Vitória	Paul da Pedreira do Cabo da Praia	38°42'15,538"N, 27°2'47,222"W	38.7043	-27.0465	WGS84	3	10	2016.10.11	2016	LIFECWR TEAM	1	Animalia	Chordata	Aves	Anseriformes	Anatidae	Anas	crecca		Anas crecca	Linnaeus, 1758	Anas crecca Linnaeus, 1758	species	Sofia Goulart, Mariana R. Brito and Sónia Santos	2016
8075	FieldObservation	https://creativecommons.org/licenses/by/4.0/legalcode	UAc	0a80feca-b411-428a-a34e-c5c2fa07cdba	Birds from Praia da Vitória marshes (Terceira, Azores, Portugal)	ObservedSpecimen	Palearctic	Portugal	Azores	Terceira	Praia da Vitória	Paul da Praia da Vitória	38°44'5.915"N, 27°3'36.131"W	38.735	-27.06	WGS84	6	10	2016.10.13	2016	LIFECWR TEAM	2	Animalia	Chordata	Aves	Anseriformes	Anatidae	Anas	crecca		Anas crecca	Linnaeus, 1758	Anas crecca Linnaeus, 1758	species	Sofia Goulart, Mariana R. Brito and Sónia Santos	2016
8076	FieldObservation	https://creativecommons.org/licenses/by/4.0/legalcode	UAc	0a80feca-b411-428a-a34e-c5c2fa07cdba	Birds from Praia da Vitória marshes (Terceira, Azores, Portugal)	ObservedSpecimen	Palearctic	Portugal	Azores	Terceira	Praia da Vitória	Paul da Pedreira do Cabo da Praia	38°42'15,538"N, 27°2'47,222"W	38.7043	-27.0465	WGS84	3	10	2016.10.13	2016	LIFECWR TEAM	3	Animalia	Chordata	Aves	Anseriformes	Anatidae	Anas	crecca		Anas crecca	Linnaeus, 1758	Anas crecca Linnaeus, 1758	species	Sofia Goulart, Mariana R. Brito and Sónia Santos	2016
8133	FieldObservation	https://creativecommons.org/licenses/by/4.0/legalcode	UAc	0a80feca-b411-428a-a34e-c5c2fa07cdba	Birds from Praia da Vitória marshes (Terceira, Azores, Portugal)	ObservedSpecimen	Palearctic	Portugal	Azores	Terceira	Praia da Vitória	Paul da Praia da Vitória	38°44'5.915"N, 27°3'36.131"W	38.735	-27.06	WGS84	6	10	2016.11.21	2016	LIFECWR TEAM	2	Animalia	Chordata	Aves	Anseriformes	Anatidae	Anas	crecca		Anas crecca	Linnaeus, 1758	Anas crecca Linnaeus, 1758	species	Sofia Goulart, Mariana R. Brito and Sónia Santos	2016
8152	FieldObservation	https://creativecommons.org/licenses/by/4.0/legalcode	UAc	0a80feca-b411-428a-a34e-c5c2fa07cdba	Birds from Praia da Vitória marshes (Terceira, Azores, Portugal)	ObservedSpecimen	Palearctic	Portugal	Azores	Terceira	Praia da Vitória	Paul da Praia da Vitória	38°44'5.915"N, 27°3'36.131"W	38.735	-27.06	WGS84	6	10	2016.11.7	2016	LIFECWR TEAM	3	Animalia	Chordata	Aves	Anseriformes	Anatidae	Anas	crecca		Anas crecca	Linnaeus, 1758	Anas crecca Linnaeus, 1758	species	Sofia Goulart, Mariana R. Brito and Sónia Santos	2016
8153	FieldObservation	https://creativecommons.org/licenses/by/4.0/legalcode	UAc	0a80feca-b411-428a-a34e-c5c2fa07cdba	Birds from Praia da Vitória marshes (Terceira, Azores, Portugal)	ObservedSpecimen	Palearctic	Portugal	Azores	Terceira	Praia da Vitória	Paul da Pedreira do Cabo da Praia	38°42'15,538"N, 27°2'47,222"W	38.7043	-27.0465	WGS84	3	10	2016.11.7	2016	LIFECWR TEAM	12	Animalia	Chordata	Aves	Anseriformes	Anatidae	Anas	crecca		Anas crecca	Linnaeus, 1758	Anas crecca Linnaeus, 1758	species	Sofia Goulart, Mariana R. Brito and Sónia Santos	2016
8181	FieldObservation	https://creativecommons.org/licenses/by/4.0/legalcode	UAc	0a80feca-b411-428a-a34e-c5c2fa07cdba	Birds from Praia da Vitória marshes (Terceira, Azores, Portugal)	ObservedSpecimen	Palearctic	Portugal	Azores	Terceira	Praia da Vitória	Paul da Pedreira do Cabo da Praia	38°42'15,538"N, 27°2'47,222"W	38.7043	-27.0465	WGS84	3	10	2016.11.8	2016	LIFECWR TEAM	1	Animalia	Chordata	Aves	Anseriformes	Anatidae	Anas	crecca		Anas crecca	Linnaeus, 1758	Anas crecca Linnaeus, 1758	species	Sofia Goulart, Mariana R. Brito and Sónia Santos	2016
8182	FieldObservation	https://creativecommons.org/licenses/by/4.0/legalcode	UAc	0a80feca-b411-428a-a34e-c5c2fa07cdba	Birds from Praia da Vitória marshes (Terceira, Azores, Portugal)	ObservedSpecimen	Palearctic	Portugal	Azores	Terceira	Praia da Vitória	Paul da Praia da Vitória	38°44'5.915"N, 27°3'36.131"W	38.735	-27.06	WGS84	6	10	2016.11.8	2016	LIFECWR TEAM	2	Animalia	Chordata	Aves	Anseriformes	Anatidae	Anas	crecca		Anas crecca	Linnaeus, 1758	Anas crecca Linnaeus, 1758	species	Sofia Goulart, Mariana R. Brito and Sónia Santos	2016
8209	FieldObservation	https://creativecommons.org/licenses/by/4.0/legalcode	UAc	0a80feca-b411-428a-a34e-c5c2fa07cdba	Birds from Praia da Vitória marshes (Terceira, Azores, Portugal)	ObservedSpecimen	Palearctic	Portugal	Azores	Terceira	Praia da Vitória	Paul da Pedreira do Cabo da Praia	38°42'15,538"N, 27°2'47,222"W	38.7043	-27.0465	WGS84	3	10	2016.12.20	2016	LIFECWR TEAM	6	Animalia	Chordata	Aves	Anseriformes	Anatidae	Anas	crecca		Anas crecca	Linnaeus, 1758	Anas crecca Linnaeus, 1758	species	Sofia Goulart, Mariana R. Brito and Sónia Santos	2016
8225	FieldObservation	https://creativecommons.org/licenses/by/4.0/legalcode	UAc	0a80feca-b411-428a-a34e-c5c2fa07cdba	Birds from Praia da Vitória marshes (Terceira, Azores, Portugal)	ObservedSpecimen	Palearctic	Portugal	Azores	Terceira	Praia da Vitória	Paul da Pedreira do Cabo da Praia	38°42'15,538"N, 27°2'47,222"W	38.7043	-27.0465	WGS84	3	10	2016.12.21	2016	LIFECWR TEAM	1	Animalia	Chordata	Aves	Anseriformes	Anatidae	Anas	crecca		Anas crecca	Linnaeus, 1758	Anas crecca Linnaeus, 1758	species	Sofia Goulart, Mariana R. Brito and Sónia Santos	2016
8269	FieldObservation	https://creativecommons.org/licenses/by/4.0/legalcode	UAc	0a80feca-b411-428a-a34e-c5c2fa07cdba	Birds from Praia da Vitória marshes (Terceira, Azores, Portugal)	ObservedSpecimen	Palearctic	Portugal	Azores	Terceira	Praia da Vitória	Paul da Praia da Vitória	38°44'5.915"N, 27°3'36.131"W	38.735	-27.06	WGS84	6	10	2016.2.10	2016	LIFECWR TEAM	1	Animalia	Chordata	Aves	Anseriformes	Anatidae	Anas	crecca		Anas crecca	Linnaeus, 1758	Anas crecca Linnaeus, 1758	species	Sofia Goulart, Mariana R. Brito and Sónia Santos	2016
8341	FieldObservation	https://creativecommons.org/licenses/by/4.0/legalcode	UAc	0a80feca-b411-428a-a34e-c5c2fa07cdba	Birds from Praia da Vitória marshes (Terceira, Azores, Portugal)	ObservedSpecimen	Palearctic	Portugal	Azores	Terceira	Praia da Vitória	Paul da Praia da Vitória	38°44'5.915"N, 27°3'36.131"W	38.735	-27.06	WGS84	6	10	2016.2.15	2016	LIFECWR TEAM	1	Animalia	Chordata	Aves	Anseriformes	Anatidae	Anas	crecca		Anas crecca	Linnaeus, 1758	Anas crecca Linnaeus, 1758	species	Sofia Goulart, Mariana R. Brito and Sónia Santos	2016
8425	FieldObservation	https://creativecommons.org/licenses/by/4.0/legalcode	UAc	0a80feca-b411-428a-a34e-c5c2fa07cdba	Birds from Praia da Vitória marshes (Terceira, Azores, Portugal)	ObservedSpecimen	Palearctic	Portugal	Azores	Terceira	Praia da Vitória	Paul da Praia da Vitória	38°44'5.915"N, 27°3'36.131"W	38.735	-27.06	WGS84	6	10	2016.2.2	2016	LIFECWR TEAM	1	Animalia	Chordata	Aves	Anseriformes	Anatidae	Anas	crecca		Anas crecca	Linnaeus, 1758	Anas crecca Linnaeus, 1758	species	Sofia Goulart, Mariana R. Brito and Sónia Santos	2016
8504	FieldObservation	https://creativecommons.org/licenses/by/4.0/legalcode	UAc	0a80feca-b411-428a-a34e-c5c2fa07cdba	Birds from Praia da Vitória marshes (Terceira, Azores, Portugal)	ObservedSpecimen	Palearctic	Portugal	Azores	Terceira	Praia da Vitória	Paul da Praia da Vitória	38°44'5.915"N, 27°3'36.131"W	38.735	-27.06	WGS84	6	10	2016.2.24	2016	LIFECWR TEAM	1	Animalia	Chordata	Aves	Anseriformes	Anatidae	Anas	crecca		Anas crecca	Linnaeus, 1758	Anas crecca Linnaeus, 1758	species	Sofia Goulart, Mariana R. Brito and Sónia Santos	2016
8582	FieldObservation	https://creativecommons.org/licenses/by/4.0/legalcode	UAc	0a80feca-b411-428a-a34e-c5c2fa07cdba	Birds from Praia da Vitória marshes (Terceira, Azores, Portugal)	ObservedSpecimen	Palearctic	Portugal	Azores	Terceira	Praia da Vitória	Paul da Praia da Vitória	38°44'5.915"N, 27°3'36.131"W	38.735	-27.06	WGS84	6	10	2016.2.4	2016	LIFECWR TEAM	1	Animalia	Chordata	Aves	Anseriformes	Anatidae	Anas	crecca		Anas crecca	Linnaeus, 1758	Anas crecca Linnaeus, 1758	species	Sofia Goulart, Mariana R. Brito and Sónia Santos	2016
8606	FieldObservation	https://creativecommons.org/licenses/by/4.0/legalcode	UAc	0a80feca-b411-428a-a34e-c5c2fa07cdba	Birds from Praia da Vitória marshes (Terceira, Azores, Portugal)	ObservedSpecimen	Palearctic	Portugal	Azores	Terceira	Praia da Vitória	Paul da Praia da Vitória	38°44'5.915"N, 27°3'36.131"W	38.735	-27.06	WGS84	6	10	2016.2.5	2016	LIFECWR TEAM	1	Animalia	Chordata	Aves	Anseriformes	Anatidae	Anas	crecca		Anas crecca	Linnaeus, 1758	Anas crecca Linnaeus, 1758	species	Sofia Goulart, Mariana R. Brito and Sónia Santos	2016
8633	FieldObservation	https://creativecommons.org/licenses/by/4.0/legalcode	UAc	0a80feca-b411-428a-a34e-c5c2fa07cdba	Birds from Praia da Vitória marshes (Terceira, Azores, Portugal)	ObservedSpecimen	Palearctic	Portugal	Azores	Terceira	Praia da Vitória	Paul da Praia da Vitória	38°44'5.915"N, 27°3'36.131"W	38.735	-27.06	WGS84	6	10	2016.2.8	2016	LIFECWR TEAM	1	Animalia	Chordata	Aves	Anseriformes	Anatidae	Anas	crecca		Anas crecca	Linnaeus, 1758	Anas crecca Linnaeus, 1758	species	Sofia Goulart, Mariana R. Brito and Sónia Santos	2016
8833	FieldObservation	https://creativecommons.org/licenses/by/4.0/legalcode	UAc	0a80feca-b411-428a-a34e-c5c2fa07cdba	Birds from Praia da Vitória marshes (Terceira, Azores, Portugal)	ObservedSpecimen	Palearctic	Portugal	Azores	Terceira	Praia da Vitória	Paul da Praia da Vitória	38°44'5.915"N, 27°3'36.131"W	38.735	-27.06	WGS84	6	10	2016.3.2	2016	LIFECWR TEAM	1	Animalia	Chordata	Aves	Anseriformes	Anatidae	Anas	crecca		Anas crecca	Linnaeus, 1758	Anas crecca Linnaeus, 1758	species	Sofia Goulart, Mariana R. Brito and Sónia Santos	2016
9034	FieldObservation	https://creativecommons.org/licenses/by/4.0/legalcode	UAc	0a80feca-b411-428a-a34e-c5c2fa07cdba	Birds from Praia da Vitória marshes (Terceira, Azores, Portugal)	ObservedSpecimen	Palearctic	Portugal	Azores	Terceira	Praia da Vitória	Paul da Praia da Vitória	38°44'5.915"N, 27°3'36.131"W	38.735	-27.06	WGS84	6	10	2016.3.7	2016	LIFECWR TEAM	1	Animalia	Chordata	Aves	Anseriformes	Anatidae	Anas	crecca		Anas crecca	Linnaeus, 1758	Anas crecca Linnaeus, 1758	species	Sofia Goulart, Mariana R. Brito and Sónia Santos	2016
9060	FieldObservation	https://creativecommons.org/licenses/by/4.0/legalcode	UAc	0a80feca-b411-428a-a34e-c5c2fa07cdba	Birds from Praia da Vitória marshes (Terceira, Azores, Portugal)	ObservedSpecimen	Palearctic	Portugal	Azores	Terceira	Praia da Vitória	Paul da Pedreira do Cabo da Praia	38°42'15,538"N, 27°2'47,222"W	38.7043	-27.0465	WGS84	3	10	2016.3.8	2016	LIFECWR TEAM	2	Animalia	Chordata	Aves	Anseriformes	Anatidae	Anas	crecca		Anas crecca	Linnaeus, 1758	Anas crecca Linnaeus, 1758	species	Sofia Goulart, Mariana R. Brito and Sónia Santos	2016
9087	FieldObservation	https://creativecommons.org/licenses/by/4.0/legalcode	UAc	0a80feca-b411-428a-a34e-c5c2fa07cdba	Birds from Praia da Vitória marshes (Terceira, Azores, Portugal)	ObservedSpecimen	Palearctic	Portugal	Azores	Terceira	Praia da Vitória	Paul da Praia da Vitória	38°44'5.915"N, 27°3'36.131"W	38.735	-27.06	WGS84	6	10	2016.3.9	2016	LIFECWR TEAM	1	Animalia	Chordata	Aves	Anseriformes	Anatidae	Anas	crecca		Anas crecca	Linnaeus, 1758	Anas crecca Linnaeus, 1758	species	Sofia Goulart, Mariana R. Brito and Sónia Santos	2016
9753	FieldObservation	https://creativecommons.org/licenses/by/4.0/legalcode	UAc	0a80feca-b411-428a-a34e-c5c2fa07cdba	Birds from Praia da Vitória marshes (Terceira, Azores, Portugal)	ObservedSpecimen	Palearctic	Portugal	Azores	Terceira	Praia da Vitória	Paul da Pedreira do Cabo da Praia	38°42'15,538"N, 27°2'47,222"W	38.7043	-27.0465	WGS84	3	10	2017.1.12	2017	LIFECWR TEAM	9	Animalia	Chordata	Aves	Anseriformes	Anatidae	Anas	crecca		Anas crecca	Linnaeus, 1758	Anas crecca Linnaeus, 1758	species	Sofia Goulart, Mariana R. Brito and Sónia Santos	2017
9785	FieldObservation	https://creativecommons.org/licenses/by/4.0/legalcode	UAc	0a80feca-b411-428a-a34e-c5c2fa07cdba	Birds from Praia da Vitória marshes (Terceira, Azores, Portugal)	ObservedSpecimen	Palearctic	Portugal	Azores	Terceira	Praia da Vitória	Paul da Pedreira do Cabo da Praia	38°42'15,538"N, 27°2'47,222"W	38.7043	-27.0465	WGS84	3	10	2017.1.17	2017	LIFECWR TEAM	8	Animalia	Chordata	Aves	Anseriformes	Anatidae	Anas	crecca		Anas crecca	Linnaeus, 1758	Anas crecca Linnaeus, 1758	species	Sofia Goulart, Mariana R. Brito and Sónia Santos	2017
9833	FieldObservation	https://creativecommons.org/licenses/by/4.0/legalcode	UAc	0a80feca-b411-428a-a34e-c5c2fa07cdba	Birds from Praia da Vitória marshes (Terceira, Azores, Portugal)	ObservedSpecimen	Palearctic	Portugal	Azores	Terceira	Praia da Vitória	Paul da Pedreira do Cabo da Praia	38°42'15,538"N, 27°2'47,222"W	38.7043	-27.0465	WGS84	3	10	2017.1.5	2017	LIFECWR TEAM	6	Animalia	Chordata	Aves	Anseriformes	Anatidae	Anas	crecca		Anas crecca	Linnaeus, 1758	Anas crecca Linnaeus, 1758	species	Sofia Goulart, Mariana R. Brito and Sónia Santos	2017
9853	FieldObservation	https://creativecommons.org/licenses/by/4.0/legalcode	UAc	0a80feca-b411-428a-a34e-c5c2fa07cdba	Birds from Praia da Vitória marshes (Terceira, Azores, Portugal)	ObservedSpecimen	Palearctic	Portugal	Azores	Terceira	Praia da Vitória	Paul da Pedreira do Cabo da Praia	38°42'15,538"N, 27°2'47,222"W	38.7043	-27.0465	WGS84	3	10	2017.1.6	2017	LIFECWR TEAM	6	Animalia	Chordata	Aves	Anseriformes	Anatidae	Anas	crecca		Anas crecca	Linnaeus, 1758	Anas crecca Linnaeus, 1758	species	Sofia Goulart, Mariana R. Brito and Sónia Santos	2017
9882	FieldObservation	https://creativecommons.org/licenses/by/4.0/legalcode	UAc	0a80feca-b411-428a-a34e-c5c2fa07cdba	Birds from Praia da Vitória marshes (Terceira, Azores, Portugal)	ObservedSpecimen	Palearctic	Portugal	Azores	Terceira	Praia da Vitória	Paul da Pedreira do Cabo da Praia	38°42'15,538"N, 27°2'47,222"W	38.7043	-27.0465	WGS84	3	10	2017.10.18	2017	LIFECWR TEAM	1	Animalia	Chordata	Aves	Anseriformes	Anatidae	Anas	crecca		Anas crecca	Linnaeus, 1758	Anas crecca Linnaeus, 1758	species	Sofia Goulart, Mariana R. Brito and Sónia Santos	2017
9930	FieldObservation	https://creativecommons.org/licenses/by/4.0/legalcode	UAc	0a80feca-b411-428a-a34e-c5c2fa07cdba	Birds from Praia da Vitória marshes (Terceira, Azores, Portugal)	ObservedSpecimen	Palearctic	Portugal	Azores	Terceira	Praia da Vitória	Paul da Pedreira do Cabo da Praia	38°42'15,538"N, 27°2'47,222"W	38.7043	-27.0465	WGS84	3	10	2017.10.20	2017	LIFECWR TEAM	1	Animalia	Chordata	Aves	Anseriformes	Anatidae	Anas	crecca		Anas crecca	Linnaeus, 1758	Anas crecca Linnaeus, 1758	species	Sofia Goulart, Mariana R. Brito and Sónia Santos	2017
9981	FieldObservation	https://creativecommons.org/licenses/by/4.0/legalcode	UAc	0a80feca-b411-428a-a34e-c5c2fa07cdba	Birds from Praia da Vitória marshes (Terceira, Azores, Portugal)	ObservedSpecimen	Palearctic	Portugal	Azores	Terceira	Praia da Vitória	Paul da Pedreira do Cabo da Praia	38°42'15,538"N, 27°2'47,222"W	38.7043	-27.0465	WGS84	3	10	2017.10.25	2017	LIFECWR TEAM	1	Animalia	Chordata	Aves	Anseriformes	Anatidae	Anas	crecca		Anas crecca	Linnaeus, 1758	Anas crecca Linnaeus, 1758	species	Sofia Goulart, Mariana R. Brito and Sónia Santos	2017
10007	FieldObservation	https://creativecommons.org/licenses/by/4.0/legalcode	UAc	0a80feca-b411-428a-a34e-c5c2fa07cdba	Birds from Praia da Vitória marshes (Terceira, Azores, Portugal)	ObservedSpecimen	Palearctic	Portugal	Azores	Terceira	Praia da Vitória	Paul da Praia da Vitória	38°44'5.915"N, 27°3'36.131"W	38.735	-27.06	WGS84	6	10	2017.10.26	2017	LIFECWR TEAM	2	Animalia	Chordata	Aves	Anseriformes	Anatidae	Anas	crecca		Anas crecca	Linnaeus, 1758	Anas crecca Linnaeus, 1758	species	Sofia Goulart, Mariana R. Brito and Sónia Santos	2017
10045	FieldObservation	https://creativecommons.org/licenses/by/4.0/legalcode	UAc	0a80feca-b411-428a-a34e-c5c2fa07cdba	Birds from Praia da Vitória marshes (Terceira, Azores, Portugal)	ObservedSpecimen	Palearctic	Portugal	Azores	Terceira	Praia da Vitória	Paul da Pedreira do Cabo da Praia	38°42'15,538"N, 27°2'47,222"W	38.7043	-27.0465	WGS84	3	10	2017.10.31	2017	LIFECWR TEAM	1	Animalia	Chordata	Aves	Anseriformes	Anatidae	Anas	crecca		Anas crecca	Linnaeus, 1758	Anas crecca Linnaeus, 1758	species	Sofia Goulart, Mariana R. Brito and Sónia Santos	2017
10134	FieldObservation	https://creativecommons.org/licenses/by/4.0/legalcode	UAc	0a80feca-b411-428a-a34e-c5c2fa07cdba	Birds from Praia da Vitória marshes (Terceira, Azores, Portugal)	ObservedSpecimen	Palearctic	Portugal	Azores	Terceira	Praia da Vitória	Paul da Praia da Vitória	38°44'5.915"N, 27°3'36.131"W	38.735	-27.06	WGS84	6	10	2017.11.10	2017	LIFECWR TEAM	2	Animalia	Chordata	Aves	Anseriformes	Anatidae	Anas	crecca		Anas crecca	Linnaeus, 1758	Anas crecca Linnaeus, 1758	species	Sofia Goulart, Mariana R. Brito and Sónia Santos	2017
10135	FieldObservation	https://creativecommons.org/licenses/by/4.0/legalcode	UAc	0a80feca-b411-428a-a34e-c5c2fa07cdba	Birds from Praia da Vitória marshes (Terceira, Azores, Portugal)	ObservedSpecimen	Palearctic	Portugal	Azores	Terceira	Praia da Vitória	Paul da Pedreira do Cabo da Praia	38°42'15,538"N, 27°2'47,222"W	38.7043	-27.0465	WGS84	3	10	2017.11.10	2017	LIFECWR TEAM	3	Animalia	Chordata	Aves	Anseriformes	Anatidae	Anas	crecca		Anas crecca	Linnaeus, 1758	Anas crecca Linnaeus, 1758	species	Sofia Goulart, Mariana R. Brito and Sónia Santos	2017
10167	FieldObservation	https://creativecommons.org/licenses/by/4.0/legalcode	UAc	0a80feca-b411-428a-a34e-c5c2fa07cdba	Birds from Praia da Vitória marshes (Terceira, Azores, Portugal)	ObservedSpecimen	Palearctic	Portugal	Azores	Terceira	Praia da Vitória	Paul da Pedreira do Cabo da Praia	38°42'15,538"N, 27°2'47,222"W	38.7043	-27.0465	WGS84	3	10	2017.11.13	2017	LIFECWR TEAM	3	Animalia	Chordata	Aves	Anseriformes	Anatidae	Anas	crecca		Anas crecca	Linnaeus, 1758	Anas crecca Linnaeus, 1758	species	Sofia Goulart, Mariana R. Brito and Sónia Santos	2017
10235	FieldObservation	https://creativecommons.org/licenses/by/4.0/legalcode	UAc	0a80feca-b411-428a-a34e-c5c2fa07cdba	Birds from Praia da Vitória marshes (Terceira, Azores, Portugal)	ObservedSpecimen	Palearctic	Portugal	Azores	Terceira	Praia da Vitória	Paul da Praia da Vitória	38°44'5.915"N, 27°3'36.131"W	38.735	-27.06	WGS84	6	10	2017.11.17	2017	LIFECWR TEAM	6	Animalia	Chordata	Aves	Anseriformes	Anatidae	Anas	crecca		Anas crecca	Linnaeus, 1758	Anas crecca Linnaeus, 1758	species	Sofia Goulart, Mariana R. Brito and Sónia Santos	2017
10263	FieldObservation	https://creativecommons.org/licenses/by/4.0/legalcode	UAc	0a80feca-b411-428a-a34e-c5c2fa07cdba	Birds from Praia da Vitória marshes (Terceira, Azores, Portugal)	ObservedSpecimen	Palearctic	Portugal	Azores	Terceira	Praia da Vitória	Paul da Pedreira do Cabo da Praia	38°42'15,538"N, 27°2'47,222"W	38.7043	-27.0465	WGS84	3	10	2017.11.2	2017	LIFECWR TEAM	1	Animalia	Chordata	Aves	Anseriformes	Anatidae	Anas	crecca		Anas crecca	Linnaeus, 1758	Anas crecca Linnaeus, 1758	species	Sofia Goulart, Mariana R. Brito and Sónia Santos	2017
10264	FieldObservation	https://creativecommons.org/licenses/by/4.0/legalcode	UAc	0a80feca-b411-428a-a34e-c5c2fa07cdba	Birds from Praia da Vitória marshes (Terceira, Azores, Portugal)	ObservedSpecimen	Palearctic	Portugal	Azores	Terceira	Praia da Vitória	Paul da Praia da Vitória	38°44'5.915"N, 27°3'36.131"W	38.735	-27.06	WGS84	6	10	2017.11.2	2017	LIFECWR TEAM	1	Animalia	Chordata	Aves	Anseriformes	Anatidae	Anas	crecca		Anas crecca	Linnaeus, 1758	Anas crecca Linnaeus, 1758	species	Sofia Goulart, Mariana R. Brito and Sónia Santos	2017
10289	FieldObservation	https://creativecommons.org/licenses/by/4.0/legalcode	UAc	0a80feca-b411-428a-a34e-c5c2fa07cdba	Birds from Praia da Vitória marshes (Terceira, Azores, Portugal)	ObservedSpecimen	Palearctic	Portugal	Azores	Terceira	Praia da Vitória	Paul da Praia da Vitória	38°44'5.915"N, 27°3'36.131"W	38.735	-27.06	WGS84	6	10	2017.11.20	2017	LIFECWR TEAM	5	Animalia	Chordata	Aves	Anseriformes	Anatidae	Anas	crecca		Anas crecca	Linnaeus, 1758	Anas crecca Linnaeus, 1758	species	Sofia Goulart, Mariana R. Brito and Sónia Santos	2017
10290	FieldObservation	https://creativecommons.org/licenses/by/4.0/legalcode	UAc	0a80feca-b411-428a-a34e-c5c2fa07cdba	Birds from Praia da Vitória marshes (Terceira, Azores, Portugal)	ObservedSpecimen	Palearctic	Portugal	Azores	Terceira	Praia da Vitória	Paul da Pedreira do Cabo da Praia	38°42'15,538"N, 27°2'47,222"W	38.7043	-27.0465	WGS84	3	10	2017.11.20	2017	LIFECWR TEAM	6	Animalia	Chordata	Aves	Anseriformes	Anatidae	Anas	crecca		Anas crecca	Linnaeus, 1758	Anas crecca Linnaeus, 1758	species	Sofia Goulart, Mariana R. Brito and Sónia Santos	2017
10390	FieldObservation	https://creativecommons.org/licenses/by/4.0/legalcode	UAc	0a80feca-b411-428a-a34e-c5c2fa07cdba	Birds from Praia da Vitória marshes (Terceira, Azores, Portugal)	ObservedSpecimen	Palearctic	Portugal	Azores	Terceira	Praia da Vitória	Paul da Pedreira do Cabo da Praia	38°42'15,538"N, 27°2'47,222"W	38.7043	-27.0465	WGS84	3	10	2017.11.3	2017	LIFECWR TEAM	1	Animalia	Chordata	Aves	Anseriformes	Anatidae	Anas	crecca		Anas crecca	Linnaeus, 1758	Anas crecca Linnaeus, 1758	species	Sofia Goulart, Mariana R. Brito and Sónia Santos	2017
10418	FieldObservation	https://creativecommons.org/licenses/by/4.0/legalcode	UAc	0a80feca-b411-428a-a34e-c5c2fa07cdba	Birds from Praia da Vitória marshes (Terceira, Azores, Portugal)	ObservedSpecimen	Palearctic	Portugal	Azores	Terceira	Praia da Vitória	Paul da Pedreira do Cabo da Praia	38°42'15,538"N, 27°2'47,222"W	38.7043	-27.0465	WGS84	3	10	2017.11.8	2017	LIFECWR TEAM	2	Animalia	Chordata	Aves	Anseriformes	Anatidae	Anas	crecca		Anas crecca	Linnaeus, 1758	Anas crecca Linnaeus, 1758	species	Sofia Goulart, Mariana R. Brito and Sónia Santos	2017
10441	FieldObservation	https://creativecommons.org/licenses/by/4.0/legalcode	UAc	0a80feca-b411-428a-a34e-c5c2fa07cdba	Birds from Praia da Vitória marshes (Terceira, Azores, Portugal)	ObservedSpecimen	Palearctic	Portugal	Azores	Terceira	Praia da Vitória	Paul da Pedreira do Cabo da Praia	38°42'15,538"N, 27°2'47,222"W	38.7043	-27.0465	WGS84	3	10	2017.11.9	2017	LIFECWR TEAM	2	Animalia	Chordata	Aves	Anseriformes	Anatidae	Anas	crecca		Anas crecca	Linnaeus, 1758	Anas crecca Linnaeus, 1758	species	Sofia Goulart, Mariana R. Brito and Sónia Santos	2017
10548	FieldObservation	https://creativecommons.org/licenses/by/4.0/legalcode	UAc	0a80feca-b411-428a-a34e-c5c2fa07cdba	Birds from Praia da Vitória marshes (Terceira, Azores, Portugal)	ObservedSpecimen	Palearctic	Portugal	Azores	Terceira	Praia da Vitória	Paul da Praia da Vitória	38°44'5.915"N, 27°3'36.131"W	38.735	-27.06	WGS84	6	10	2017.12.4	2017	LIFECWR TEAM	1	Animalia	Chordata	Aves	Anseriformes	Anatidae	Anas	crecca		Anas crecca	Linnaeus, 1758	Anas crecca Linnaeus, 1758	species	Sofia Goulart, Mariana R. Brito and Sónia Santos	2017
10661	FieldObservation	https://creativecommons.org/licenses/by/4.0/legalcode	UAc	0a80feca-b411-428a-a34e-c5c2fa07cdba	Birds from Praia da Vitória marshes (Terceira, Azores, Portugal)	ObservedSpecimen	Palearctic	Portugal	Azores	Terceira	Praia da Vitória	Paul da Pedreira do Cabo da Praia	38°42'15,538"N, 27°2'47,222"W	38.7043	-27.0465	WGS84	3	10	2017.2.23	2017	LIFECWR TEAM	4	Animalia	Chordata	Aves	Anseriformes	Anatidae	Anas	crecca		Anas crecca	Linnaeus, 1758	Anas crecca Linnaeus, 1758	species	Sofia Goulart, Mariana R. Brito and Sónia Santos	2017
10678	FieldObservation	https://creativecommons.org/licenses/by/4.0/legalcode	UAc	0a80feca-b411-428a-a34e-c5c2fa07cdba	Birds from Praia da Vitória marshes (Terceira, Azores, Portugal)	ObservedSpecimen	Palearctic	Portugal	Azores	Terceira	Praia da Vitória	Paul da Pedreira do Cabo da Praia	38°42'15,538"N, 27°2'47,222"W	38.7043	-27.0465	WGS84	3	10	2017.2.24	2017	LIFECWR TEAM	10	Animalia	Chordata	Aves	Anseriformes	Anatidae	Anas	crecca		Anas crecca	Linnaeus, 1758	Anas crecca Linnaeus, 1758	species	Sofia Goulart, Mariana R. Brito and Sónia Santos	2017
10724	FieldObservation	https://creativecommons.org/licenses/by/4.0/legalcode	UAc	0a80feca-b411-428a-a34e-c5c2fa07cdba	Birds from Praia da Vitória marshes (Terceira, Azores, Portugal)	ObservedSpecimen	Palearctic	Portugal	Azores	Terceira	Praia da Vitória	Paul da Pedreira do Cabo da Praia	38°42'15,538"N, 27°2'47,222"W	38.7043	-27.0465	WGS84	3	10	2017.3.1	2017	LIFECWR TEAM	2	Animalia	Chordata	Aves	Anseriformes	Anatidae	Anas	crecca		Anas crecca	Linnaeus, 1758	Anas crecca Linnaeus, 1758	species	Sofia Goulart, Mariana R. Brito and Sónia Santos	2017
10766	FieldObservation	https://creativecommons.org/licenses/by/4.0/legalcode	UAc	0a80feca-b411-428a-a34e-c5c2fa07cdba	Birds from Praia da Vitória marshes (Terceira, Azores, Portugal)	ObservedSpecimen	Palearctic	Portugal	Azores	Terceira	Praia da Vitória	Paul da Pedreira do Cabo da Praia	38°42'15,538"N, 27°2'47,222"W	38.7043	-27.0465	WGS84	3	10	2017.3.13	2017	LIFECWR TEAM	4	Animalia	Chordata	Aves	Anseriformes	Anatidae	Anas	crecca		Anas crecca	Linnaeus, 1758	Anas crecca Linnaeus, 1758	species	Sofia Goulart, Mariana R. Brito and Sónia Santos	2017
10782	FieldObservation	https://creativecommons.org/licenses/by/4.0/legalcode	UAc	0a80feca-b411-428a-a34e-c5c2fa07cdba	Birds from Praia da Vitória marshes (Terceira, Azores, Portugal)	ObservedSpecimen	Palearctic	Portugal	Azores	Terceira	Praia da Vitória	Paul da Pedreira do Cabo da Praia	38°42'15,538"N, 27°2'47,222"W	38.7043	-27.0465	WGS84	3	10	2017.3.14	2017	LIFECWR TEAM	6	Animalia	Chordata	Aves	Anseriformes	Anatidae	Anas	crecca		Anas crecca	Linnaeus, 1758	Anas crecca Linnaeus, 1758	species	Sofia Goulart, Mariana R. Brito and Sónia Santos	2017
10796	FieldObservation	https://creativecommons.org/licenses/by/4.0/legalcode	UAc	0a80feca-b411-428a-a34e-c5c2fa07cdba	Birds from Praia da Vitória marshes (Terceira, Azores, Portugal)	ObservedSpecimen	Palearctic	Portugal	Azores	Terceira	Praia da Vitória	Paul da Pedreira do Cabo da Praia	38°42'15,538"N, 27°2'47,222"W	38.7043	-27.0465	WGS84	3	10	2017.3.2	2017	LIFECWR TEAM	6	Animalia	Chordata	Aves	Anseriformes	Anatidae	Anas	crecca		Anas crecca	Linnaeus, 1758	Anas crecca Linnaeus, 1758	species	Sofia Goulart, Mariana R. Brito and Sónia Santos	2017
12109	FieldObservation	https://creativecommons.org/licenses/by/4.0/legalcode	UAc	0a80feca-b411-428a-a34e-c5c2fa07cdba	Birds from Praia da Vitória marshes (Terceira, Azores, Portugal)	ObservedSpecimen	Palearctic	Portugal	Azores	Terceira	Praia da Vitória	Paul da Praia da Vitória	38°44'5.915"N, 27°3'36.131"W	38.735	-27.06	WGS84	6	10	2018.1.12	2018	LIFECWR TEAM	4	Animalia	Chordata	Aves	Anseriformes	Anatidae	Anas	crecca		Anas crecca	Linnaeus, 1758	Anas crecca Linnaeus, 1758	species	Sofia Goulart, Mariana R. Brito and Sónia Santos	2018
12117	FieldObservation	https://creativecommons.org/licenses/by/4.0/legalcode	UAc	0a80feca-b411-428a-a34e-c5c2fa07cdba	Birds from Praia da Vitória marshes (Terceira, Azores, Portugal)	ObservedSpecimen	Palearctic	Portugal	Azores	Terceira	Praia da Vitória	Paul da Praia da Vitória	38°44'5.915"N, 27°3'36.131"W	38.735	-27.06	WGS84	6	10	2018.1.15	2018	LIFECWR TEAM	8	Animalia	Chordata	Aves	Anseriformes	Anatidae	Anas	crecca		Anas crecca	Linnaeus, 1758	Anas crecca Linnaeus, 1758	species	Sofia Goulart, Mariana R. Brito and Sónia Santos	2018
12126	FieldObservation	https://creativecommons.org/licenses/by/4.0/legalcode	UAc	0a80feca-b411-428a-a34e-c5c2fa07cdba	Birds from Praia da Vitória marshes (Terceira, Azores, Portugal)	ObservedSpecimen	Palearctic	Portugal	Azores	Terceira	Praia da Vitória	Paul da Praia da Vitória	38°44'5.915"N, 27°3'36.131"W	38.735	-27.06	WGS84	6	10	2018.1.18	2018	LIFECWR TEAM	9	Animalia	Chordata	Aves	Anseriformes	Anatidae	Anas	crecca		Anas crecca	Linnaeus, 1758	Anas crecca Linnaeus, 1758	species	Sofia Goulart, Mariana R. Brito and Sónia Santos	2018
12146	FieldObservation	https://creativecommons.org/licenses/by/4.0/legalcode	UAc	0a80feca-b411-428a-a34e-c5c2fa07cdba	Birds from Praia da Vitória marshes (Terceira, Azores, Portugal)	ObservedSpecimen	Palearctic	Portugal	Azores	Terceira	Praia da Vitória	Paul da Praia da Vitória	38°44'5.915"N, 27°3'36.131"W	38.735	-27.06	WGS84	6	10	2018.1.8	2018	LIFECWR TEAM	4	Animalia	Chordata	Aves	Anseriformes	Anatidae	Anas	crecca		Anas crecca	Linnaeus, 1758	Anas crecca Linnaeus, 1758	species	Sofia Goulart, Mariana R. Brito and Sónia Santos	2018
12200	FieldObservation	https://creativecommons.org/licenses/by/4.0/legalcode	UAc	0a80feca-b411-428a-a34e-c5c2fa07cdba	Birds from Praia da Vitória marshes (Terceira, Azores, Portugal)	ObservedSpecimen	Palearctic	Portugal	Azores	Terceira	Praia da Vitória	Paul da Pedreira do Cabo da Praia	38°42'15,538"N, 27°2'47,222"W	38.7043	-27.0465	WGS84	3	10	22.10.2018	2018	LIFECWR TEAM	1	Animalia	Chordata	Aves	Anseriformes	Anatidae	Anas	crecca		Anas crecca	Linnaeus, 1758	Anas crecca Linnaeus, 1758	species	Sofia Goulart, Mariana R. Brito and Sónia Santos	2018
12243	FieldObservation	https://creativecommons.org/licenses/by/4.0/legalcode	UAc	0a80feca-b411-428a-a34e-c5c2fa07cdba	Birds from Praia da Vitória marshes (Terceira, Azores, Portugal)	ObservedSpecimen	Palearctic	Portugal	Azores	Terceira	Praia da Vitória	Paul da Pedreira do Cabo da Praia	38°42'15,538"N, 27°2'47,222"W	38.7043	-27.0465	WGS84	3	10	23.10.2018	2018	LIFECWR TEAM	1	Animalia	Chordata	Aves	Anseriformes	Anatidae	Anas	crecca		Anas crecca	Linnaeus, 1758	Anas crecca Linnaeus, 1758	species	Sofia Goulart, Mariana R. Brito and Sónia Santos	2018
12320	FieldObservation	https://creativecommons.org/licenses/by/4.0/legalcode	UAc	0a80feca-b411-428a-a34e-c5c2fa07cdba	Birds from Praia da Vitória marshes (Terceira, Azores, Portugal)	ObservedSpecimen	Palearctic	Portugal	Azores	Terceira	Praia da Vitória	Paul da Pedreira do Cabo da Praia	38°42'15,538"N, 27°2'47,222"W	38.7043	-27.0465	WGS84	3	10	25.10.2018	2018	LIFECWR TEAM	1	Animalia	Chordata	Aves	Anseriformes	Anatidae	Anas	crecca		Anas crecca	Linnaeus, 1758	Anas crecca Linnaeus, 1758	species	Sofia Goulart, Mariana R. Brito and Sónia Santos	2018
12458	FieldObservation	https://creativecommons.org/licenses/by/4.0/legalcode	UAc	0a80feca-b411-428a-a34e-c5c2fa07cdba	Birds from Praia da Vitória marshes (Terceira, Azores, Portugal)	ObservedSpecimen	Palearctic	Portugal	Azores	Terceira	Praia da Vitória	Paul da Pedreira do Cabo da Praia	38°42'15,538"N, 27°2'47,222"W	38.7043	-27.0465	WGS84	3	10	30.10.2018	2018	LIFECWR TEAM	3	Animalia	Chordata	Aves	Anseriformes	Anatidae	Anas	crecca		Anas crecca	Linnaeus, 1758	Anas crecca Linnaeus, 1758	species	Sofia Goulart, Mariana R. Brito and Sónia Santos	2018
19	FieldObservation	https://creativecommons.org/licenses/by/4.0/legalcode	UAc	0a80feca-b411-428a-a34e-c5c2fa07cdba	Birds from Praia da Vitória marshes (Terceira, Azores, Portugal)	ObservedSpecimen	Palearctic	Portugal	Azores	Terceira	Praia da Vitória	Paul da Praia da Vitória	38°44'5.915"N, 27°3'36.131"W	38.735	-27.06	WGS84	6	10	2018.10.01	2018	LIFECWR TEAM	1	Animalia	Chordata	Aves	Anseriformes	Anatidae	Anas	discors		Anas discors	Linnaeus, 1766	Anas discors Linnaeus, 1766	species	Sofia Goulart, Mariana R. Brito and Sónia Santos	2018
381	FieldObservation	https://creativecommons.org/licenses/by/4.0/legalcode	UAc	0a80feca-b411-428a-a34e-c5c2fa07cdba	Birds from Praia da Vitória marshes (Terceira, Azores, Portugal)	ObservedSpecimen	Palearctic	Portugal	Azores	Terceira	Praia da Vitória	Paul da Praia da Vitória	38°44'5.915"N, 27°3'36.131"W	38.735	-27.06	WGS84	6	10	2018.02.15	2018	LIFECWR TEAM	2	Animalia	Chordata	Aves	Anseriformes	Anatidae	Anas	discors		Anas discors	Linnaeus, 1766	Anas discors Linnaeus, 1766	species	Sofia Goulart, Mariana R. Brito and Sónia Santos	2018
1052	FieldObservation	https://creativecommons.org/licenses/by/4.0/legalcode	UAc	0a80feca-b411-428a-a34e-c5c2fa07cdba	Birds from Praia da Vitória marshes (Terceira, Azores, Portugal)	ObservedSpecimen	Palearctic	Portugal	Azores	Terceira	Praia da Vitória	Paul da Pedreira do Cabo da Praia	38°42'15,538"N, 27°2'47,222"W	38.7043	-27.0465	WGS84	3	10	2013.11.12	2013	LIFECWR TEAM	1	Animalia	Chordata	Aves	Anseriformes	Anatidae	Anas	discors		Anas discors	Linnaeus, 1766	Anas discors Linnaeus, 1766	species	Sofia Goulart, Mariana R. Brito and Sónia Santos	2013
1082	FieldObservation	https://creativecommons.org/licenses/by/4.0/legalcode	UAc	0a80feca-b411-428a-a34e-c5c2fa07cdba	Birds from Praia da Vitória marshes (Terceira, Azores, Portugal)	ObservedSpecimen	Palearctic	Portugal	Azores	Terceira	Praia da Vitória	Paul da Pedreira do Cabo da Praia	38°42'15,538"N, 27°2'47,222"W	38.7043	-27.0465	WGS84	3	10	2013.11.14	2013	LIFECWR TEAM	1	Animalia	Chordata	Aves	Anseriformes	Anatidae	Anas	discors		Anas discors	Linnaeus, 1766	Anas discors Linnaeus, 1766	species	Sofia Goulart, Mariana R. Brito and Sónia Santos	2013
1097	FieldObservation	https://creativecommons.org/licenses/by/4.0/legalcode	UAc	0a80feca-b411-428a-a34e-c5c2fa07cdba	Birds from Praia da Vitória marshes (Terceira, Azores, Portugal)	ObservedSpecimen	Palearctic	Portugal	Azores	Terceira	Praia da Vitória	Paul da Pedreira do Cabo da Praia	38°42'15,538"N, 27°2'47,222"W	38.7043	-27.0465	WGS84	3	10	2013.11.15	2013	LIFECWR TEAM	1	Animalia	Chordata	Aves	Anseriformes	Anatidae	Anas	discors		Anas discors	Linnaeus, 1766	Anas discors Linnaeus, 1766	species	Sofia Goulart, Mariana R. Brito and Sónia Santos	2013
1121	FieldObservation	https://creativecommons.org/licenses/by/4.0/legalcode	UAc	0a80feca-b411-428a-a34e-c5c2fa07cdba	Birds from Praia da Vitória marshes (Terceira, Azores, Portugal)	ObservedSpecimen	Palearctic	Portugal	Azores	Terceira	Praia da Vitória	Paul da Pedreira do Cabo da Praia	38°42'15,538"N, 27°2'47,222"W	38.7043	-27.0465	WGS84	3	10	2013.11.18	2013	LIFECWR TEAM	1	Animalia	Chordata	Aves	Anseriformes	Anatidae	Anas	discors		Anas discors	Linnaeus, 1766	Anas discors Linnaeus, 1766	species	Sofia Goulart, Mariana R. Brito and Sónia Santos	2013
1203	FieldObservation	https://creativecommons.org/licenses/by/4.0/legalcode	UAc	0a80feca-b411-428a-a34e-c5c2fa07cdba	Birds from Praia da Vitória marshes (Terceira, Azores, Portugal)	ObservedSpecimen	Palearctic	Portugal	Azores	Terceira	Praia da Vitória	Paul da Pedreira do Cabo da Praia	38°42'15,538"N, 27°2'47,222"W	38.7043	-27.0465	WGS84	3	10	2013.11.26	2013	LIFECWR TEAM	1	Animalia	Chordata	Aves	Anseriformes	Anatidae	Anas	discors		Anas discors	Linnaeus, 1766	Anas discors Linnaeus, 1766	species	Sofia Goulart, Mariana R. Brito and Sónia Santos	2013
1224	FieldObservation	https://creativecommons.org/licenses/by/4.0/legalcode	UAc	0a80feca-b411-428a-a34e-c5c2fa07cdba	Birds from Praia da Vitória marshes (Terceira, Azores, Portugal)	ObservedSpecimen	Palearctic	Portugal	Azores	Terceira	Praia da Vitória	Paul da Pedreira do Cabo da Praia	38°42'15,538"N, 27°2'47,222"W	38.7043	-27.0465	WGS84	3	10	2013.11.27	2013	LIFECWR TEAM	2	Animalia	Chordata	Aves	Anseriformes	Anatidae	Anas	discors		Anas discors	Linnaeus, 1766	Anas discors Linnaeus, 1766	species	Sofia Goulart, Mariana R. Brito and Sónia Santos	2013
1245	FieldObservation	https://creativecommons.org/licenses/by/4.0/legalcode	UAc	0a80feca-b411-428a-a34e-c5c2fa07cdba	Birds from Praia da Vitória marshes (Terceira, Azores, Portugal)	ObservedSpecimen	Palearctic	Portugal	Azores	Terceira	Praia da Vitória	Paul da Pedreira do Cabo da Praia	38°42'15,538"N, 27°2'47,222"W	38.7043	-27.0465	WGS84	3	10	2013.11.28	2013	LIFECWR TEAM	8	Animalia	Chordata	Aves	Anseriformes	Anatidae	Anas	discors		Anas discors	Linnaeus, 1766	Anas discors Linnaeus, 1766	species	Sofia Goulart, Mariana R. Brito and Sónia Santos	2013
1267	FieldObservation	https://creativecommons.org/licenses/by/4.0/legalcode	UAc	0a80feca-b411-428a-a34e-c5c2fa07cdba	Birds from Praia da Vitória marshes (Terceira, Azores, Portugal)	ObservedSpecimen	Palearctic	Portugal	Azores	Terceira	Praia da Vitória	Paul da Pedreira do Cabo da Praia	38°42'15,538"N, 27°2'47,222"W	38.7043	-27.0465	WGS84	3	10	2013.11.29	2013	LIFECWR TEAM	2	Animalia	Chordata	Aves	Anseriformes	Anatidae	Anas	discors		Anas discors	Linnaeus, 1766	Anas discors Linnaeus, 1766	species	Sofia Goulart, Mariana R. Brito and Sónia Santos	2013
1564	FieldObservation	https://creativecommons.org/licenses/by/4.0/legalcode	UAc	0a80feca-b411-428a-a34e-c5c2fa07cdba	Birds from Praia da Vitória marshes (Terceira, Azores, Portugal)	ObservedSpecimen	Palearctic	Portugal	Azores	Terceira	Praia da Vitória	Paul da Pedreira do Cabo da Praia	38°42'15,538"N, 27°2'47,222"W	38.7043	-27.0465	WGS84	3	10	2013.12.4	2013	LIFECWR TEAM	6	Animalia	Chordata	Aves	Anseriformes	Anatidae	Anas	discors		Anas discors	Linnaeus, 1766	Anas discors Linnaeus, 1766	species	Sofia Goulart, Mariana R. Brito and Sónia Santos	2013
1584	FieldObservation	https://creativecommons.org/licenses/by/4.0/legalcode	UAc	0a80feca-b411-428a-a34e-c5c2fa07cdba	Birds from Praia da Vitória marshes (Terceira, Azores, Portugal)	ObservedSpecimen	Palearctic	Portugal	Azores	Terceira	Praia da Vitória	Paul da Pedreira do Cabo da Praia	38°42'15,538"N, 27°2'47,222"W	38.7043	-27.0465	WGS84	3	10	2013.12.6	2013	LIFECWR TEAM	1	Animalia	Chordata	Aves	Anseriformes	Anatidae	Anas	discors		Anas discors	Linnaeus, 1766	Anas discors Linnaeus, 1766	species	Sofia Goulart, Mariana R. Brito and Sónia Santos	2013
1835	FieldObservation	https://creativecommons.org/licenses/by/4.0/legalcode	UAc	0a80feca-b411-428a-a34e-c5c2fa07cdba	Birds from Praia da Vitória marshes (Terceira, Azores, Portugal)	ObservedSpecimen	Palearctic	Portugal	Azores	Terceira	Praia da Vitória	Paul da Pedreira do Cabo da Praia	38°42'15,538"N, 27°2'47,222"W	38.7043	-27.0465	WGS84	3	10	2013.9.17	2013	LIFECWR TEAM	6	Animalia	Chordata	Aves	Anseriformes	Anatidae	Anas	discors		Anas discors	Linnaeus, 1766	Anas discors Linnaeus, 1766	species	Sofia Goulart, Mariana R. Brito and Sónia Santos	2013
1860	FieldObservation	https://creativecommons.org/licenses/by/4.0/legalcode	UAc	0a80feca-b411-428a-a34e-c5c2fa07cdba	Birds from Praia da Vitória marshes (Terceira, Azores, Portugal)	ObservedSpecimen	Palearctic	Portugal	Azores	Terceira	Praia da Vitória	Paul da Pedreira do Cabo da Praia	38°42'15,538"N, 27°2'47,222"W	38.7043	-27.0465	WGS84	3	10	2013.9.18	2013	LIFECWR TEAM	6	Animalia	Chordata	Aves	Anseriformes	Anatidae	Anas	discors		Anas discors	Linnaeus, 1766	Anas discors Linnaeus, 1766	species	Sofia Goulart, Mariana R. Brito and Sónia Santos	2013
1882	FieldObservation	https://creativecommons.org/licenses/by/4.0/legalcode	UAc	0a80feca-b411-428a-a34e-c5c2fa07cdba	Birds from Praia da Vitória marshes (Terceira, Azores, Portugal)	ObservedSpecimen	Palearctic	Portugal	Azores	Terceira	Praia da Vitória	Paul da Pedreira do Cabo da Praia	38°42'15,538"N, 27°2'47,222"W	38.7043	-27.0465	WGS84	3	10	2013.9.19	2013	LIFECWR TEAM	6	Animalia	Chordata	Aves	Anseriformes	Anatidae	Anas	discors		Anas discors	Linnaeus, 1766	Anas discors Linnaeus, 1766	species	Sofia Goulart, Mariana R. Brito and Sónia Santos	2013
1929	FieldObservation	https://creativecommons.org/licenses/by/4.0/legalcode	UAc	0a80feca-b411-428a-a34e-c5c2fa07cdba	Birds from Praia da Vitória marshes (Terceira, Azores, Portugal)	ObservedSpecimen	Palearctic	Portugal	Azores	Terceira	Praia da Vitória	Paul da Pedreira do Cabo da Praia	38°42'15,538"N, 27°2'47,222"W	38.7043	-27.0465	WGS84	3	10	2013.9.23	2013	LIFECWR TEAM	6	Animalia	Chordata	Aves	Anseriformes	Anatidae	Anas	discors		Anas discors	Linnaeus, 1766	Anas discors Linnaeus, 1766	species	Sofia Goulart, Mariana R. Brito and Sónia Santos	2013
1951	FieldObservation	https://creativecommons.org/licenses/by/4.0/legalcode	UAc	0a80feca-b411-428a-a34e-c5c2fa07cdba	Birds from Praia da Vitória marshes (Terceira, Azores, Portugal)	ObservedSpecimen	Palearctic	Portugal	Azores	Terceira	Praia da Vitória	Paul da Pedreira do Cabo da Praia	38°42'15,538"N, 27°2'47,222"W	38.7043	-27.0465	WGS84	3	10	2013.9.24	2013	LIFECWR TEAM	6	Animalia	Chordata	Aves	Anseriformes	Anatidae	Anas	discors		Anas discors	Linnaeus, 1766	Anas discors Linnaeus, 1766	species	Sofia Goulart, Mariana R. Brito and Sónia Santos	2013
1970	FieldObservation	https://creativecommons.org/licenses/by/4.0/legalcode	UAc	0a80feca-b411-428a-a34e-c5c2fa07cdba	Birds from Praia da Vitória marshes (Terceira, Azores, Portugal)	ObservedSpecimen	Palearctic	Portugal	Azores	Terceira	Praia da Vitória	Paul da Pedreira do Cabo da Praia	38°42'15,538"N, 27°2'47,222"W	38.7043	-27.0465	WGS84	3	10	2013.9.25	2013	LIFECWR TEAM	6	Animalia	Chordata	Aves	Anseriformes	Anatidae	Anas	discors		Anas discors	Linnaeus, 1766	Anas discors Linnaeus, 1766	species	Sofia Goulart, Mariana R. Brito and Sónia Santos	2013
2034	FieldObservation	https://creativecommons.org/licenses/by/4.0/legalcode	UAc	0a80feca-b411-428a-a34e-c5c2fa07cdba	Birds from Praia da Vitória marshes (Terceira, Azores, Portugal)	ObservedSpecimen	Palearctic	Portugal	Azores	Terceira	Praia da Vitória	Paul da Pedreira do Cabo da Praia	38°42'15,538"N, 27°2'47,222"W	38.7043	-27.0465	WGS84	3	10	2013.9.30	2013	LIFECWR TEAM	6	Animalia	Chordata	Aves	Anseriformes	Anatidae	Anas	discors		Anas discors	Linnaeus, 1766	Anas discors Linnaeus, 1766	species	Sofia Goulart, Mariana R. Brito and Sónia Santos	2013
2368	FieldObservation	https://creativecommons.org/licenses/by/4.0/legalcode	UAc	0a80feca-b411-428a-a34e-c5c2fa07cdba	Birds from Praia da Vitória marshes (Terceira, Azores, Portugal)	ObservedSpecimen	Palearctic	Portugal	Azores	Terceira	Praia da Vitória	Paul da Pedreira do Cabo da Praia	38°42'15,538"N, 27°2'47,222"W	38.7043	-27.0465	WGS84	3	10	2014.10.1	2014	LIFECWR TEAM	1	Animalia	Chordata	Aves	Anseriformes	Anatidae	Anas	discors		Anas discors	Linnaeus, 1766	Anas discors Linnaeus, 1766	species	Sofia Goulart, Mariana R. Brito and Sónia Santos	2014
2403	FieldObservation	https://creativecommons.org/licenses/by/4.0/legalcode	UAc	0a80feca-b411-428a-a34e-c5c2fa07cdba	Birds from Praia da Vitória marshes (Terceira, Azores, Portugal)	ObservedSpecimen	Palearctic	Portugal	Azores	Terceira	Praia da Vitória	Paul da Pedreira do Cabo da Praia	38°42'15,538"N, 27°2'47,222"W	38.7043	-27.0465	WGS84	3	10	2014.10.13	2014	LIFECWR TEAM	2	Animalia	Chordata	Aves	Anseriformes	Anatidae	Anas	discors		Anas discors	Linnaeus, 1766	Anas discors Linnaeus, 1766	species	Sofia Goulart, Mariana R. Brito and Sónia Santos	2014
2422	FieldObservation	https://creativecommons.org/licenses/by/4.0/legalcode	UAc	0a80feca-b411-428a-a34e-c5c2fa07cdba	Birds from Praia da Vitória marshes (Terceira, Azores, Portugal)	ObservedSpecimen	Palearctic	Portugal	Azores	Terceira	Praia da Vitória	Paul da Pedreira do Cabo da Praia	38°42'15,538"N, 27°2'47,222"W	38.7043	-27.0465	WGS84	3	10	2014.10.15	2014	LIFECWR TEAM	2	Animalia	Chordata	Aves	Anseriformes	Anatidae	Anas	discors		Anas discors	Linnaeus, 1766	Anas discors Linnaeus, 1766	species	Sofia Goulart, Mariana R. Brito and Sónia Santos	2014
2588	FieldObservation	https://creativecommons.org/licenses/by/4.0/legalcode	UAc	0a80feca-b411-428a-a34e-c5c2fa07cdba	Birds from Praia da Vitória marshes (Terceira, Azores, Portugal)	ObservedSpecimen	Palearctic	Portugal	Azores	Terceira	Praia da Vitória	Paul da Praia da Vitória	38°44'5.915"N, 27°3'36.131"W	38.735	-27.06	WGS84	6	10	2014.10.27	2014	LIFECWR TEAM	2	Animalia	Chordata	Aves	Anseriformes	Anatidae	Anas	discors		Anas discors	Linnaeus, 1766	Anas discors Linnaeus, 1766	species	Sofia Goulart, Mariana R. Brito and Sónia Santos	2014
2660	FieldObservation	https://creativecommons.org/licenses/by/4.0/legalcode	UAc	0a80feca-b411-428a-a34e-c5c2fa07cdba	Birds from Praia da Vitória marshes (Terceira, Azores, Portugal)	ObservedSpecimen	Palearctic	Portugal	Azores	Terceira	Praia da Vitória	Paul da Pedreira do Cabo da Praia	38°42'15,538"N, 27°2'47,222"W	38.7043	-27.0465	WGS84	3	10	2014.10.31	2014	LIFECWR TEAM	2	Animalia	Chordata	Aves	Anseriformes	Anatidae	Anas	discors		Anas discors	Linnaeus, 1766	Anas discors Linnaeus, 1766	species	Sofia Goulart, Mariana R. Brito and Sónia Santos	2014
2755	FieldObservation	https://creativecommons.org/licenses/by/4.0/legalcode	UAc	0a80feca-b411-428a-a34e-c5c2fa07cdba	Birds from Praia da Vitória marshes (Terceira, Azores, Portugal)	ObservedSpecimen	Palearctic	Portugal	Azores	Terceira	Praia da Vitória	Paul da Praia da Vitória	38°44'5.915"N, 27°3'36.131"W	38.735	-27.06	WGS84	6	10	2014.11.12	2014	LIFECWR TEAM	2	Animalia	Chordata	Aves	Anseriformes	Anatidae	Anas	discors		Anas discors	Linnaeus, 1766	Anas discors Linnaeus, 1766	species	Sofia Goulart, Mariana R. Brito and Sónia Santos	2014
4341	FieldObservation	https://creativecommons.org/licenses/by/4.0/legalcode	UAc	0a80feca-b411-428a-a34e-c5c2fa07cdba	Birds from Praia da Vitória marshes (Terceira, Azores, Portugal)	ObservedSpecimen	Palearctic	Portugal	Azores	Terceira	Praia da Vitória	Paul da Pedreira do Cabo da Praia	38°42'15,538"N, 27°2'47,222"W	38.7043	-27.0465	WGS84	3	10	2014.9.12	2014	LIFECWR TEAM	4	Animalia	Chordata	Aves	Anseriformes	Anatidae	Anas	discors		Anas discors	Linnaeus, 1766	Anas discors Linnaeus, 1766	species	Sofia Goulart, Mariana R. Brito and Sónia Santos	2014
4358	FieldObservation	https://creativecommons.org/licenses/by/4.0/legalcode	UAc	0a80feca-b411-428a-a34e-c5c2fa07cdba	Birds from Praia da Vitória marshes (Terceira, Azores, Portugal)	ObservedSpecimen	Palearctic	Portugal	Azores	Terceira	Praia da Vitória	Paul da Pedreira do Cabo da Praia	38°42'15,538"N, 27°2'47,222"W	38.7043	-27.0465	WGS84	3	10	2014.9.17	2014	LIFECWR TEAM	4	Animalia	Chordata	Aves	Anseriformes	Anatidae	Anas	discors		Anas discors	Linnaeus, 1766	Anas discors Linnaeus, 1766	species	Sofia Goulart, Mariana R. Brito and Sónia Santos	2014
4421	FieldObservation	https://creativecommons.org/licenses/by/4.0/legalcode	UAc	0a80feca-b411-428a-a34e-c5c2fa07cdba	Birds from Praia da Vitória marshes (Terceira, Azores, Portugal)	ObservedSpecimen	Palearctic	Portugal	Azores	Terceira	Praia da Vitória	Paul da Pedreira do Cabo da Praia	38°42'15,538"N, 27°2'47,222"W	38.7043	-27.0465	WGS84	3	10	2014.9.24	2014	LIFECWR TEAM	4	Animalia	Chordata	Aves	Anseriformes	Anatidae	Anas	discors		Anas discors	Linnaeus, 1766	Anas discors Linnaeus, 1766	species	Sofia Goulart, Mariana R. Brito and Sónia Santos	2014
4435	FieldObservation	https://creativecommons.org/licenses/by/4.0/legalcode	UAc	0a80feca-b411-428a-a34e-c5c2fa07cdba	Birds from Praia da Vitória marshes (Terceira, Azores, Portugal)	ObservedSpecimen	Palearctic	Portugal	Azores	Terceira	Praia da Vitória	Paul da Pedreira do Cabo da Praia	38°42'15,538"N, 27°2'47,222"W	38.7043	-27.0465	WGS84	3	10	2014.9.25	2014	LIFECWR TEAM	1	Animalia	Chordata	Aves	Anseriformes	Anatidae	Anas	discors		Anas discors	Linnaeus, 1766	Anas discors Linnaeus, 1766	species	Sofia Goulart, Mariana R. Brito and Sónia Santos	2014
4450	FieldObservation	https://creativecommons.org/licenses/by/4.0/legalcode	UAc	0a80feca-b411-428a-a34e-c5c2fa07cdba	Birds from Praia da Vitória marshes (Terceira, Azores, Portugal)	ObservedSpecimen	Palearctic	Portugal	Azores	Terceira	Praia da Vitória	Paul da Pedreira do Cabo da Praia	38°42'15,538"N, 27°2'47,222"W	38.7043	-27.0465	WGS84	3	10	2014.9.26	2014	LIFECWR TEAM	1	Animalia	Chordata	Aves	Anseriformes	Anatidae	Anas	discors		Anas discors	Linnaeus, 1766	Anas discors Linnaeus, 1766	species	Sofia Goulart, Mariana R. Brito and Sónia Santos	2014
4466	FieldObservation	https://creativecommons.org/licenses/by/4.0/legalcode	UAc	0a80feca-b411-428a-a34e-c5c2fa07cdba	Birds from Praia da Vitória marshes (Terceira, Azores, Portugal)	ObservedSpecimen	Palearctic	Portugal	Azores	Terceira	Praia da Vitória	Paul da Pedreira do Cabo da Praia	38°42'15,538"N, 27°2'47,222"W	38.7043	-27.0465	WGS84	3	10	2014.9.29	2014	LIFECWR TEAM	1	Animalia	Chordata	Aves	Anseriformes	Anatidae	Anas	discors		Anas discors	Linnaeus, 1766	Anas discors Linnaeus, 1766	species	Sofia Goulart, Mariana R. Brito and Sónia Santos	2014
4482	FieldObservation	https://creativecommons.org/licenses/by/4.0/legalcode	UAc	0a80feca-b411-428a-a34e-c5c2fa07cdba	Birds from Praia da Vitória marshes (Terceira, Azores, Portugal)	ObservedSpecimen	Palearctic	Portugal	Azores	Terceira	Praia da Vitória	Paul da Pedreira do Cabo da Praia	38°42'15,538"N, 27°2'47,222"W	38.7043	-27.0465	WGS84	3	10	2014.9.3	2014	LIFECWR TEAM	4	Animalia	Chordata	Aves	Anseriformes	Anatidae	Anas	discors		Anas discors	Linnaeus, 1766	Anas discors Linnaeus, 1766	species	Sofia Goulart, Mariana R. Brito and Sónia Santos	2014
4525	FieldObservation	https://creativecommons.org/licenses/by/4.0/legalcode	UAc	0a80feca-b411-428a-a34e-c5c2fa07cdba	Birds from Praia da Vitória marshes (Terceira, Azores, Portugal)	ObservedSpecimen	Palearctic	Portugal	Azores	Terceira	Praia da Vitória	Paul da Pedreira do Cabo da Praia	38°42'15,538"N, 27°2'47,222"W	38.7043	-27.0465	WGS84	3	10	2014.9.5	2014	LIFECWR TEAM	4	Animalia	Chordata	Aves	Anseriformes	Anatidae	Anas	discors		Anas discors	Linnaeus, 1766	Anas discors Linnaeus, 1766	species	Sofia Goulart, Mariana R. Brito and Sónia Santos	2014
4559	FieldObservation	https://creativecommons.org/licenses/by/4.0/legalcode	UAc	0a80feca-b411-428a-a34e-c5c2fa07cdba	Birds from Praia da Vitória marshes (Terceira, Azores, Portugal)	ObservedSpecimen	Palearctic	Portugal	Azores	Terceira	Praia da Vitória	Paul da Pedreira do Cabo da Praia	38°42'15,538"N, 27°2'47,222"W	38.7043	-27.0465	WGS84	3	10	2014.9.9	2014	LIFECWR TEAM	4	Animalia	Chordata	Aves	Anseriformes	Anatidae	Anas	discors		Anas discors	Linnaeus, 1766	Anas discors Linnaeus, 1766	species	Sofia Goulart, Mariana R. Brito and Sónia Santos	2014
4678	FieldObservation	https://creativecommons.org/licenses/by/4.0/legalcode	UAc	0a80feca-b411-428a-a34e-c5c2fa07cdba	Birds from Praia da Vitória marshes (Terceira, Azores, Portugal)	ObservedSpecimen	Palearctic	Portugal	Azores	Terceira	Praia da Vitória	Paul da Praia da Vitória	38°44'5.915"N, 27°3'36.131"W	38.735	-27.06	WGS84	6	10	2015.1.19	2015	LIFECWR TEAM	2	Animalia	Chordata	Aves	Anseriformes	Anatidae	Anas	discors		Anas discors	Linnaeus, 1766	Anas discors Linnaeus, 1766	species	Sofia Goulart, Mariana R. Brito and Sónia Santos	2015
4709	FieldObservation	https://creativecommons.org/licenses/by/4.0/legalcode	UAc	0a80feca-b411-428a-a34e-c5c2fa07cdba	Birds from Praia da Vitória marshes (Terceira, Azores, Portugal)	ObservedSpecimen	Palearctic	Portugal	Azores	Terceira	Praia da Vitória	Paul da Praia da Vitória	38°44'5.915"N, 27°3'36.131"W	38.735	-27.06	WGS84	6	10	2015.1.20	2015	LIFECWR TEAM	2	Animalia	Chordata	Aves	Anseriformes	Anatidae	Anas	discors		Anas discors	Linnaeus, 1766	Anas discors Linnaeus, 1766	species	Sofia Goulart, Mariana R. Brito and Sónia Santos	2015
4732	FieldObservation	https://creativecommons.org/licenses/by/4.0/legalcode	UAc	0a80feca-b411-428a-a34e-c5c2fa07cdba	Birds from Praia da Vitória marshes (Terceira, Azores, Portugal)	ObservedSpecimen	Palearctic	Portugal	Azores	Terceira	Praia da Vitória	Paul da Praia da Vitória	38°44'5.915"N, 27°3'36.131"W	38.735	-27.06	WGS84	6	10	2015.1.21	2015	LIFECWR TEAM	2	Animalia	Chordata	Aves	Anseriformes	Anatidae	Anas	discors		Anas discors	Linnaeus, 1766	Anas discors Linnaeus, 1766	species	Sofia Goulart, Mariana R. Brito and Sónia Santos	2015
4821	FieldObservation	https://creativecommons.org/licenses/by/4.0/legalcode	UAc	0a80feca-b411-428a-a34e-c5c2fa07cdba	Birds from Praia da Vitória marshes (Terceira, Azores, Portugal)	ObservedSpecimen	Palearctic	Portugal	Azores	Terceira	Praia da Vitória	Paul da Praia da Vitória	38°44'5.915"N, 27°3'36.131"W	38.735	-27.06	WGS84	6	10	2015.1.27	2015	LIFECWR TEAM	1	Animalia	Chordata	Aves	Anseriformes	Anatidae	Anas	discors		Anas discors	Linnaeus, 1766	Anas discors Linnaeus, 1766	species	Sofia Goulart, Mariana R. Brito and Sónia Santos	2015
4857	FieldObservation	https://creativecommons.org/licenses/by/4.0/legalcode	UAc	0a80feca-b411-428a-a34e-c5c2fa07cdba	Birds from Praia da Vitória marshes (Terceira, Azores, Portugal)	ObservedSpecimen	Palearctic	Portugal	Azores	Terceira	Praia da Vitória	Paul da Praia da Vitória	38°44'5.915"N, 27°3'36.131"W	38.735	-27.06	WGS84	6	10	2015.1.29	2015	LIFECWR TEAM	2	Animalia	Chordata	Aves	Anseriformes	Anatidae	Anas	discors		Anas discors	Linnaeus, 1766	Anas discors Linnaeus, 1766	species	Sofia Goulart, Mariana R. Brito and Sónia Santos	2015
4884	FieldObservation	https://creativecommons.org/licenses/by/4.0/legalcode	UAc	0a80feca-b411-428a-a34e-c5c2fa07cdba	Birds from Praia da Vitória marshes (Terceira, Azores, Portugal)	ObservedSpecimen	Palearctic	Portugal	Azores	Terceira	Praia da Vitória	Paul da Praia da Vitória	38°44'5.915"N, 27°3'36.131"W	38.735	-27.06	WGS84	6	10	2015.1.6	2015	LIFECWR TEAM	2	Animalia	Chordata	Aves	Anseriformes	Anatidae	Anas	discors		Anas discors	Linnaeus, 1766	Anas discors Linnaeus, 1766	species	Sofia Goulart, Mariana R. Brito and Sónia Santos	2015
4911	FieldObservation	https://creativecommons.org/licenses/by/4.0/legalcode	UAc	0a80feca-b411-428a-a34e-c5c2fa07cdba	Birds from Praia da Vitória marshes (Terceira, Azores, Portugal)	ObservedSpecimen	Palearctic	Portugal	Azores	Terceira	Praia da Vitória	Paul da Praia da Vitória	38°44'5.915"N, 27°3'36.131"W	38.735	-27.06	WGS84	6	10	2015.1.7	2015	LIFECWR TEAM	2	Animalia	Chordata	Aves	Anseriformes	Anatidae	Anas	discors		Anas discors	Linnaeus, 1766	Anas discors Linnaeus, 1766	species	Sofia Goulart, Mariana R. Brito and Sónia Santos	2015
4991	FieldObservation	https://creativecommons.org/licenses/by/4.0/legalcode	UAc	0a80feca-b411-428a-a34e-c5c2fa07cdba	Birds from Praia da Vitória marshes (Terceira, Azores, Portugal)	ObservedSpecimen	Palearctic	Portugal	Azores	Terceira	Praia da Vitória	Paul da Pedreira do Cabo da Praia	38°42'15,538"N, 27°2'47,222"W	38.7043	-27.0465	WGS84	3	10	2015.10.12	2015	LIFECWR TEAM	1	Animalia	Chordata	Aves	Anseriformes	Anatidae	Anas	discors		Anas discors	Linnaeus, 1766	Anas discors Linnaeus, 1766	species	Sofia Goulart, Mariana R. Brito and Sónia Santos	2015
5013	FieldObservation	https://creativecommons.org/licenses/by/4.0/legalcode	UAc	0a80feca-b411-428a-a34e-c5c2fa07cdba	Birds from Praia da Vitória marshes (Terceira, Azores, Portugal)	ObservedSpecimen	Palearctic	Portugal	Azores	Terceira	Praia da Vitória	Paul da Pedreira do Cabo da Praia	38°42'15,538"N, 27°2'47,222"W	38.7043	-27.0465	WGS84	3	10	2015.10.13	2015	LIFECWR TEAM	1	Animalia	Chordata	Aves	Anseriformes	Anatidae	Anas	discors		Anas discors	Linnaeus, 1766	Anas discors Linnaeus, 1766	species	Sofia Goulart, Mariana R. Brito and Sónia Santos	2015
5039	FieldObservation	https://creativecommons.org/licenses/by/4.0/legalcode	UAc	0a80feca-b411-428a-a34e-c5c2fa07cdba	Birds from Praia da Vitória marshes (Terceira, Azores, Portugal)	ObservedSpecimen	Palearctic	Portugal	Azores	Terceira	Praia da Vitória	Paul da Pedreira do Cabo da Praia	38°42'15,538"N, 27°2'47,222"W	38.7043	-27.0465	WGS84	3	10	2015.10.16	2015	LIFECWR TEAM	1	Animalia	Chordata	Aves	Anseriformes	Anatidae	Anas	discors		Anas discors	Linnaeus, 1766	Anas discors Linnaeus, 1766	species	Sofia Goulart, Mariana R. Brito and Sónia Santos	2015
5236	FieldObservation	https://creativecommons.org/licenses/by/4.0/legalcode	UAc	0a80feca-b411-428a-a34e-c5c2fa07cdba	Birds from Praia da Vitória marshes (Terceira, Azores, Portugal)	ObservedSpecimen	Palearctic	Portugal	Azores	Terceira	Praia da Vitória	Paul da Pedreira do Cabo da Praia	38°42'15,538"N, 27°2'47,222"W	38.7043	-27.0465	WGS84	3	10	2015.10.7	2015	LIFECWR TEAM	1	Animalia	Chordata	Aves	Anseriformes	Anatidae	Anas	discors		Anas discors	Linnaeus, 1766	Anas discors Linnaeus, 1766	species	Sofia Goulart, Mariana R. Brito and Sónia Santos	2015
5264	FieldObservation	https://creativecommons.org/licenses/by/4.0/legalcode	UAc	0a80feca-b411-428a-a34e-c5c2fa07cdba	Birds from Praia da Vitória marshes (Terceira, Azores, Portugal)	ObservedSpecimen	Palearctic	Portugal	Azores	Terceira	Praia da Vitória	Paul da Pedreira do Cabo da Praia	38°42'15,538"N, 27°2'47,222"W	38.7043	-27.0465	WGS84	3	10	2015.10.8	2015	LIFECWR TEAM	2	Animalia	Chordata	Aves	Anseriformes	Anatidae	Anas	discors		Anas discors	Linnaeus, 1766	Anas discors Linnaeus, 1766	species	Sofia Goulart, Mariana R. Brito and Sónia Santos	2015
5284	FieldObservation	https://creativecommons.org/licenses/by/4.0/legalcode	UAc	0a80feca-b411-428a-a34e-c5c2fa07cdba	Birds from Praia da Vitória marshes (Terceira, Azores, Portugal)	ObservedSpecimen	Palearctic	Portugal	Azores	Terceira	Praia da Vitória	Paul da Pedreira do Cabo da Praia	38°42'15,538"N, 27°2'47,222"W	38.7043	-27.0465	WGS84	3	10	2015.10.9	2015	LIFECWR TEAM	2	Animalia	Chordata	Aves	Anseriformes	Anatidae	Anas	discors		Anas discors	Linnaeus, 1766	Anas discors Linnaeus, 1766	species	Sofia Goulart, Mariana R. Brito and Sónia Santos	2015
5585	FieldObservation	https://creativecommons.org/licenses/by/4.0/legalcode	UAc	0a80feca-b411-428a-a34e-c5c2fa07cdba	Birds from Praia da Vitória marshes (Terceira, Azores, Portugal)	ObservedSpecimen	Palearctic	Portugal	Azores	Terceira	Praia da Vitória	Paul da Pedreira do Cabo da Praia	38°42'15,538"N, 27°2'47,222"W	38.7043	-27.0465	WGS84	3	10	2015.11.30	2015	LIFECWR TEAM	1	Animalia	Chordata	Aves	Anseriformes	Anatidae	Anas	discors		Anas discors	Linnaeus, 1766	Anas discors Linnaeus, 1766	species	Sofia Goulart, Mariana R. Brito and Sónia Santos	2015
5612	FieldObservation	https://creativecommons.org/licenses/by/4.0/legalcode	UAc	0a80feca-b411-428a-a34e-c5c2fa07cdba	Birds from Praia da Vitória marshes (Terceira, Azores, Portugal)	ObservedSpecimen	Palearctic	Portugal	Azores	Terceira	Praia da Vitória	Paul da Pedreira do Cabo da Praia	38°42'15,538"N, 27°2'47,222"W	38.7043	-27.0465	WGS84	3	10	2015.11.5	2015	LIFECWR TEAM	1	Animalia	Chordata	Aves	Anseriformes	Anatidae	Anas	discors		Anas discors	Linnaeus, 1766	Anas discors Linnaeus, 1766	species	Sofia Goulart, Mariana R. Brito and Sónia Santos	2015
5801	FieldObservation	https://creativecommons.org/licenses/by/4.0/legalcode	UAc	0a80feca-b411-428a-a34e-c5c2fa07cdba	Birds from Praia da Vitória marshes (Terceira, Azores, Portugal)	ObservedSpecimen	Palearctic	Portugal	Azores	Terceira	Praia da Vitória	Paul da Praia da Vitória	38°44'5.915"N, 27°3'36.131"W	38.735	-27.06	WGS84	6	10	2015.12.18	2015	LIFECWR TEAM	3	Animalia	Chordata	Aves	Anseriformes	Anatidae	Anas	discors		Anas discors	Linnaeus, 1766	Anas discors Linnaeus, 1766	species	Sofia Goulart, Mariana R. Brito and Sónia Santos	2015
5813	FieldObservation	https://creativecommons.org/licenses/by/4.0/legalcode	UAc	0a80feca-b411-428a-a34e-c5c2fa07cdba	Birds from Praia da Vitória marshes (Terceira, Azores, Portugal)	ObservedSpecimen	Palearctic	Portugal	Azores	Terceira	Praia da Vitória	Paul da Pedreira do Cabo da Praia	38°42'15,538"N, 27°2'47,222"W	38.7043	-27.0465	WGS84	3	10	2015.12.2	2015	LIFECWR TEAM	2	Animalia	Chordata	Aves	Anseriformes	Anatidae	Anas	discors		Anas discors	Linnaeus, 1766	Anas discors Linnaeus, 1766	species	Sofia Goulart, Mariana R. Brito and Sónia Santos	2015
5838	FieldObservation	https://creativecommons.org/licenses/by/4.0/legalcode	UAc	0a80feca-b411-428a-a34e-c5c2fa07cdba	Birds from Praia da Vitória marshes (Terceira, Azores, Portugal)	ObservedSpecimen	Palearctic	Portugal	Azores	Terceira	Praia da Vitória	Paul da Praia da Vitória	38°44'5.915"N, 27°3'36.131"W	38.735	-27.06	WGS84	6	10	2015.12.21	2015	LIFECWR TEAM	2	Animalia	Chordata	Aves	Anseriformes	Anatidae	Anas	discors		Anas discors	Linnaeus, 1766	Anas discors Linnaeus, 1766	species	Sofia Goulart, Mariana R. Brito and Sónia Santos	2015
5879	FieldObservation	https://creativecommons.org/licenses/by/4.0/legalcode	UAc	0a80feca-b411-428a-a34e-c5c2fa07cdba	Birds from Praia da Vitória marshes (Terceira, Azores, Portugal)	ObservedSpecimen	Palearctic	Portugal	Azores	Terceira	Praia da Vitória	Paul da Praia da Vitória	38°44'5.915"N, 27°3'36.131"W	38.735	-27.06	WGS84	6	10	2015.12.28	2015	LIFECWR TEAM	1	Animalia	Chordata	Aves	Anseriformes	Anatidae	Anas	discors		Anas discors	Linnaeus, 1766	Anas discors Linnaeus, 1766	species	Sofia Goulart, Mariana R. Brito and Sónia Santos	2015
5904	FieldObservation	https://creativecommons.org/licenses/by/4.0/legalcode	UAc	0a80feca-b411-428a-a34e-c5c2fa07cdba	Birds from Praia da Vitória marshes (Terceira, Azores, Portugal)	ObservedSpecimen	Palearctic	Portugal	Azores	Terceira	Praia da Vitória	Paul da Praia da Vitória	38°44'5.915"N, 27°3'36.131"W	38.735	-27.06	WGS84	6	10	2015.12.29	2015	LIFECWR TEAM	1	Animalia	Chordata	Aves	Anseriformes	Anatidae	Anas	discors		Anas discors	Linnaeus, 1766	Anas discors Linnaeus, 1766	species	Sofia Goulart, Mariana R. Brito and Sónia Santos	2015
5929	FieldObservation	https://creativecommons.org/licenses/by/4.0/legalcode	UAc	0a80feca-b411-428a-a34e-c5c2fa07cdba	Birds from Praia da Vitória marshes (Terceira, Azores, Portugal)	ObservedSpecimen	Palearctic	Portugal	Azores	Terceira	Praia da Vitória	Paul da Praia da Vitória	38°44'5.915"N, 27°3'36.131"W	38.735	-27.06	WGS84	6	10	2015.12.3	2015	LIFECWR TEAM	2	Animalia	Chordata	Aves	Anseriformes	Anatidae	Anas	discors		Anas discors	Linnaeus, 1766	Anas discors Linnaeus, 1766	species	Sofia Goulart, Mariana R. Brito and Sónia Santos	2015
5957	FieldObservation	https://creativecommons.org/licenses/by/4.0/legalcode	UAc	0a80feca-b411-428a-a34e-c5c2fa07cdba	Birds from Praia da Vitória marshes (Terceira, Azores, Portugal)	ObservedSpecimen	Palearctic	Portugal	Azores	Terceira	Praia da Vitória	Paul da Praia da Vitória	38°44'5.915"N, 27°3'36.131"W	38.735	-27.06	WGS84	6	10	2015.12.30	2015	LIFECWR TEAM	1	Animalia	Chordata	Aves	Anseriformes	Anatidae	Anas	discors		Anas discors	Linnaeus, 1766	Anas discors Linnaeus, 1766	species	Sofia Goulart, Mariana R. Brito and Sónia Santos	2015
6013	FieldObservation	https://creativecommons.org/licenses/by/4.0/legalcode	UAc	0a80feca-b411-428a-a34e-c5c2fa07cdba	Birds from Praia da Vitória marshes (Terceira, Azores, Portugal)	ObservedSpecimen	Palearctic	Portugal	Azores	Terceira	Praia da Vitória	Paul da Praia da Vitória	38°44'5.915"N, 27°3'36.131"W	38.735	-27.06	WGS84	6	10	2015.12.7	2015	LIFECWR TEAM	2	Animalia	Chordata	Aves	Anseriformes	Anatidae	Anas	discors		Anas discors	Linnaeus, 1766	Anas discors Linnaeus, 1766	species	Sofia Goulart, Mariana R. Brito and Sónia Santos	2015
6070	FieldObservation	https://creativecommons.org/licenses/by/4.0/legalcode	UAc	0a80feca-b411-428a-a34e-c5c2fa07cdba	Birds from Praia da Vitória marshes (Terceira, Azores, Portugal)	ObservedSpecimen	Palearctic	Portugal	Azores	Terceira	Praia da Vitória	Paul da Praia da Vitória	38°44'5.915"N, 27°3'36.131"W	38.735	-27.06	WGS84	6	10	2015.2.10	2015	LIFECWR TEAM	2	Animalia	Chordata	Aves	Anseriformes	Anatidae	Anas	discors		Anas discors	Linnaeus, 1766	Anas discors Linnaeus, 1766	species	Sofia Goulart, Mariana R. Brito and Sónia Santos	2015
6091	FieldObservation	https://creativecommons.org/licenses/by/4.0/legalcode	UAc	0a80feca-b411-428a-a34e-c5c2fa07cdba	Birds from Praia da Vitória marshes (Terceira, Azores, Portugal)	ObservedSpecimen	Palearctic	Portugal	Azores	Terceira	Praia da Vitória	Paul da Praia da Vitória	38°44'5.915"N, 27°3'36.131"W	38.735	-27.06	WGS84	6	10	2015.2.11	2015	LIFECWR TEAM	2	Animalia	Chordata	Aves	Anseriformes	Anatidae	Anas	discors		Anas discors	Linnaeus, 1766	Anas discors Linnaeus, 1766	species	Sofia Goulart, Mariana R. Brito and Sónia Santos	2015
6114	FieldObservation	https://creativecommons.org/licenses/by/4.0/legalcode	UAc	0a80feca-b411-428a-a34e-c5c2fa07cdba	Birds from Praia da Vitória marshes (Terceira, Azores, Portugal)	ObservedSpecimen	Palearctic	Portugal	Azores	Terceira	Praia da Vitória	Paul da Praia da Vitória	38°44'5.915"N, 27°3'36.131"W	38.735	-27.06	WGS84	6	10	2015.2.12	2015	LIFECWR TEAM	2	Animalia	Chordata	Aves	Anseriformes	Anatidae	Anas	discors		Anas discors	Linnaeus, 1766	Anas discors Linnaeus, 1766	species	Sofia Goulart, Mariana R. Brito and Sónia Santos	2015
6207	FieldObservation	https://creativecommons.org/licenses/by/4.0/legalcode	UAc	0a80feca-b411-428a-a34e-c5c2fa07cdba	Birds from Praia da Vitória marshes (Terceira, Azores, Portugal)	ObservedSpecimen	Palearctic	Portugal	Azores	Terceira	Praia da Vitória	Paul da Praia da Vitória	38°44'5.915"N, 27°3'36.131"W	38.735	-27.06	WGS84	6	10	2015.2.23	2015	LIFECWR TEAM	2	Animalia	Chordata	Aves	Anseriformes	Anatidae	Anas	discors		Anas discors	Linnaeus, 1766	Anas discors Linnaeus, 1766	species	Sofia Goulart, Mariana R. Brito and Sónia Santos	2015
6225	FieldObservation	https://creativecommons.org/licenses/by/4.0/legalcode	UAc	0a80feca-b411-428a-a34e-c5c2fa07cdba	Birds from Praia da Vitória marshes (Terceira, Azores, Portugal)	ObservedSpecimen	Palearctic	Portugal	Azores	Terceira	Praia da Vitória	Paul da Praia da Vitória	38°44'5.915"N, 27°3'36.131"W	38.735	-27.06	WGS84	6	10	2015.2.25	2015	LIFECWR TEAM	2	Animalia	Chordata	Aves	Anseriformes	Anatidae	Anas	discors		Anas discors	Linnaeus, 1766	Anas discors Linnaeus, 1766	species	Sofia Goulart, Mariana R. Brito and Sónia Santos	2015
6250	FieldObservation	https://creativecommons.org/licenses/by/4.0/legalcode	UAc	0a80feca-b411-428a-a34e-c5c2fa07cdba	Birds from Praia da Vitória marshes (Terceira, Azores, Portugal)	ObservedSpecimen	Palearctic	Portugal	Azores	Terceira	Praia da Vitória	Paul da Praia da Vitória	38°44'5.915"N, 27°3'36.131"W	38.735	-27.06	WGS84	6	10	2015.2.3	2015	LIFECWR TEAM	2	Animalia	Chordata	Aves	Anseriformes	Anatidae	Anas	discors		Anas discors	Linnaeus, 1766	Anas discors Linnaeus, 1766	species	Sofia Goulart, Mariana R. Brito and Sónia Santos	2015
6317	FieldObservation	https://creativecommons.org/licenses/by/4.0/legalcode	UAc	0a80feca-b411-428a-a34e-c5c2fa07cdba	Birds from Praia da Vitória marshes (Terceira, Azores, Portugal)	ObservedSpecimen	Palearctic	Portugal	Azores	Terceira	Praia da Vitória	Paul da Praia da Vitória	38°44'5.915"N, 27°3'36.131"W	38.735	-27.06	WGS84	6	10	2015.2.9	2015	LIFECWR TEAM	2	Animalia	Chordata	Aves	Anseriformes	Anatidae	Anas	discors		Anas discors	Linnaeus, 1766	Anas discors Linnaeus, 1766	species	Sofia Goulart, Mariana R. Brito and Sónia Santos	2015
6403	FieldObservation	https://creativecommons.org/licenses/by/4.0/legalcode	UAc	0a80feca-b411-428a-a34e-c5c2fa07cdba	Birds from Praia da Vitória marshes (Terceira, Azores, Portugal)	ObservedSpecimen	Palearctic	Portugal	Azores	Terceira	Praia da Vitória	Paul da Praia da Vitória	38°44'5.915"N, 27°3'36.131"W	38.735	-27.06	WGS84	6	10	2015.3.17	2015	LIFECWR TEAM	2	Animalia	Chordata	Aves	Anseriformes	Anatidae	Anas	discors		Anas discors	Linnaeus, 1766	Anas discors Linnaeus, 1766	species	Sofia Goulart, Mariana R. Brito and Sónia Santos	2015
6414	FieldObservation	https://creativecommons.org/licenses/by/4.0/legalcode	UAc	0a80feca-b411-428a-a34e-c5c2fa07cdba	Birds from Praia da Vitória marshes (Terceira, Azores, Portugal)	ObservedSpecimen	Palearctic	Portugal	Azores	Terceira	Praia da Vitória	Paul da Praia da Vitória	38°44'5.915"N, 27°3'36.131"W	38.735	-27.06	WGS84	6	10	2015.3.2	2015	LIFECWR TEAM	1	Animalia	Chordata	Aves	Anseriformes	Anatidae	Anas	discors		Anas discors	Linnaeus, 1766	Anas discors Linnaeus, 1766	species	Sofia Goulart, Mariana R. Brito and Sónia Santos	2015
6570	FieldObservation	https://creativecommons.org/licenses/by/4.0/legalcode	UAc	0a80feca-b411-428a-a34e-c5c2fa07cdba	Birds from Praia da Vitória marshes (Terceira, Azores, Portugal)	ObservedSpecimen	Palearctic	Portugal	Azores	Terceira	Praia da Vitória	Paul da Praia da Vitória	38°44'5.915"N, 27°3'36.131"W	38.735	-27.06	WGS84	6	10	2015.3.4	2015	LIFECWR TEAM	2	Animalia	Chordata	Aves	Anseriformes	Anatidae	Anas	discors		Anas discors	Linnaeus, 1766	Anas discors Linnaeus, 1766	species	Sofia Goulart, Mariana R. Brito and Sónia Santos	2015
7611	FieldObservation	https://creativecommons.org/licenses/by/4.0/legalcode	UAc	0a80feca-b411-428a-a34e-c5c2fa07cdba	Birds from Praia da Vitória marshes (Terceira, Azores, Portugal)	ObservedSpecimen	Palearctic	Portugal	Azores	Terceira	Praia da Vitória	Paul da Praia da Vitória	38°44'5.915"N, 27°3'36.131"W	38.735	-27.06	WGS84	6	10	2016.1.11	2016	LIFECWR TEAM	2	Animalia	Chordata	Aves	Anseriformes	Anatidae	Anas	discors		Anas discors	Linnaeus, 1766	Anas discors Linnaeus, 1766	species	Sofia Goulart, Mariana R. Brito and Sónia Santos	2016
7646	FieldObservation	https://creativecommons.org/licenses/by/4.0/legalcode	UAc	0a80feca-b411-428a-a34e-c5c2fa07cdba	Birds from Praia da Vitória marshes (Terceira, Azores, Portugal)	ObservedSpecimen	Palearctic	Portugal	Azores	Terceira	Praia da Vitória	Paul da Praia da Vitória	38°44'5.915"N, 27°3'36.131"W	38.735	-27.06	WGS84	6	10	2016.1.13	2016	LIFECWR TEAM	2	Animalia	Chordata	Aves	Anseriformes	Anatidae	Anas	discors		Anas discors	Linnaeus, 1766	Anas discors Linnaeus, 1766	species	Sofia Goulart, Mariana R. Brito and Sónia Santos	2016
7671	FieldObservation	https://creativecommons.org/licenses/by/4.0/legalcode	UAc	0a80feca-b411-428a-a34e-c5c2fa07cdba	Birds from Praia da Vitória marshes (Terceira, Azores, Portugal)	ObservedSpecimen	Palearctic	Portugal	Azores	Terceira	Praia da Vitória	Paul da Praia da Vitória	38°44'5.915"N, 27°3'36.131"W	38.735	-27.06	WGS84	6	10	2016.1.14	2016	LIFECWR TEAM	2	Animalia	Chordata	Aves	Anseriformes	Anatidae	Anas	discors		Anas discors	Linnaeus, 1766	Anas discors Linnaeus, 1766	species	Sofia Goulart, Mariana R. Brito and Sónia Santos	2016
7719	FieldObservation	https://creativecommons.org/licenses/by/4.0/legalcode	UAc	0a80feca-b411-428a-a34e-c5c2fa07cdba	Birds from Praia da Vitória marshes (Terceira, Azores, Portugal)	ObservedSpecimen	Palearctic	Portugal	Azores	Terceira	Praia da Vitória	Paul da Praia da Vitória	38°44'5.915"N, 27°3'36.131"W	38.735	-27.06	WGS84	6	10	2016.1.19	2016	LIFECWR TEAM	2	Animalia	Chordata	Aves	Anseriformes	Anatidae	Anas	discors		Anas discors	Linnaeus, 1766	Anas discors Linnaeus, 1766	species	Sofia Goulart, Mariana R. Brito and Sónia Santos	2016
7729	FieldObservation	https://creativecommons.org/licenses/by/4.0/legalcode	UAc	0a80feca-b411-428a-a34e-c5c2fa07cdba	Birds from Praia da Vitória marshes (Terceira, Azores, Portugal)	ObservedSpecimen	Palearctic	Portugal	Azores	Terceira	Praia da Vitória	Paul da Praia da Vitória	38°44'5.915"N, 27°3'36.131"W	38.735	-27.06	WGS84	6	10	2016.1.20	2016	LIFECWR TEAM	2	Animalia	Chordata	Aves	Anseriformes	Anatidae	Anas	discors		Anas discors	Linnaeus, 1766	Anas discors Linnaeus, 1766	species	Sofia Goulart, Mariana R. Brito and Sónia Santos	2016
7749	FieldObservation	https://creativecommons.org/licenses/by/4.0/legalcode	UAc	0a80feca-b411-428a-a34e-c5c2fa07cdba	Birds from Praia da Vitória marshes (Terceira, Azores, Portugal)	ObservedSpecimen	Palearctic	Portugal	Azores	Terceira	Praia da Vitória	Paul da Praia da Vitória	38°44'5.915"N, 27°3'36.131"W	38.735	-27.06	WGS84	6	10	2016.1.21	2016	LIFECWR TEAM	2	Animalia	Chordata	Aves	Anseriformes	Anatidae	Anas	discors		Anas discors	Linnaeus, 1766	Anas discors Linnaeus, 1766	species	Sofia Goulart, Mariana R. Brito and Sónia Santos	2016
7759	FieldObservation	https://creativecommons.org/licenses/by/4.0/legalcode	UAc	0a80feca-b411-428a-a34e-c5c2fa07cdba	Birds from Praia da Vitória marshes (Terceira, Azores, Portugal)	ObservedSpecimen	Palearctic	Portugal	Azores	Terceira	Praia da Vitória	Paul da Praia da Vitória	38°44'5.915"N, 27°3'36.131"W	38.735	-27.06	WGS84	6	10	2016.1.22	2016	LIFECWR TEAM	2	Animalia	Chordata	Aves	Anseriformes	Anatidae	Anas	discors		Anas discors	Linnaeus, 1766	Anas discors Linnaeus, 1766	species	Sofia Goulart, Mariana R. Brito and Sónia Santos	2016
7786	FieldObservation	https://creativecommons.org/licenses/by/4.0/legalcode	UAc	0a80feca-b411-428a-a34e-c5c2fa07cdba	Birds from Praia da Vitória marshes (Terceira, Azores, Portugal)	ObservedSpecimen	Palearctic	Portugal	Azores	Terceira	Praia da Vitória	Paul da Praia da Vitória	38°44'5.915"N, 27°3'36.131"W	38.735	-27.06	WGS84	6	10	2016.1.25	2016	LIFECWR TEAM	2	Animalia	Chordata	Aves	Anseriformes	Anatidae	Anas	discors		Anas discors	Linnaeus, 1766	Anas discors Linnaeus, 1766	species	Sofia Goulart, Mariana R. Brito and Sónia Santos	2016
7800	FieldObservation	https://creativecommons.org/licenses/by/4.0/legalcode	UAc	0a80feca-b411-428a-a34e-c5c2fa07cdba	Birds from Praia da Vitória marshes (Terceira, Azores, Portugal)	ObservedSpecimen	Palearctic	Portugal	Azores	Terceira	Praia da Vitória	Paul da Praia da Vitória	38°44'5.915"N, 27°3'36.131"W	38.735	-27.06	WGS84	6	10	2016.1.26	2016	LIFECWR TEAM	2	Animalia	Chordata	Aves	Anseriformes	Anatidae	Anas	discors		Anas discors	Linnaeus, 1766	Anas discors Linnaeus, 1766	species	Sofia Goulart, Mariana R. Brito and Sónia Santos	2016
7855	FieldObservation	https://creativecommons.org/licenses/by/4.0/legalcode	UAc	0a80feca-b411-428a-a34e-c5c2fa07cdba	Birds from Praia da Vitória marshes (Terceira, Azores, Portugal)	ObservedSpecimen	Palearctic	Portugal	Azores	Terceira	Praia da Vitória	Paul da Praia da Vitória	38°44'5.915"N, 27°3'36.131"W	38.735	-27.06	WGS84	6	10	2016.1.28	2016	LIFECWR TEAM	2	Animalia	Chordata	Aves	Anseriformes	Anatidae	Anas	discors		Anas discors	Linnaeus, 1766	Anas discors Linnaeus, 1766	species	Sofia Goulart, Mariana R. Brito and Sónia Santos	2016
7884	FieldObservation	https://creativecommons.org/licenses/by/4.0/legalcode	UAc	0a80feca-b411-428a-a34e-c5c2fa07cdba	Birds from Praia da Vitória marshes (Terceira, Azores, Portugal)	ObservedSpecimen	Palearctic	Portugal	Azores	Terceira	Praia da Vitória	Paul da Praia da Vitória	38°44'5.915"N, 27°3'36.131"W	38.735	-27.06	WGS84	6	10	2016.1.29	2016	LIFECWR TEAM	2	Animalia	Chordata	Aves	Anseriformes	Anatidae	Anas	discors		Anas discors	Linnaeus, 1766	Anas discors Linnaeus, 1766	species	Sofia Goulart, Mariana R. Brito and Sónia Santos	2016
7935	FieldObservation	https://creativecommons.org/licenses/by/4.0/legalcode	UAc	0a80feca-b411-428a-a34e-c5c2fa07cdba	Birds from Praia da Vitória marshes (Terceira, Azores, Portugal)	ObservedSpecimen	Palearctic	Portugal	Azores	Terceira	Praia da Vitória	Paul da Praia da Vitória	38°44'5.915"N, 27°3'36.131"W	38.735	-27.06	WGS84	6	10	2016.1.5	2016	LIFECWR TEAM	2	Animalia	Chordata	Aves	Anseriformes	Anatidae	Anas	discors		Anas discors	Linnaeus, 1766	Anas discors Linnaeus, 1766	species	Sofia Goulart, Mariana R. Brito and Sónia Santos	2016
7992	FieldObservation	https://creativecommons.org/licenses/by/4.0/legalcode	UAc	0a80feca-b411-428a-a34e-c5c2fa07cdba	Birds from Praia da Vitória marshes (Terceira, Azores, Portugal)	ObservedSpecimen	Palearctic	Portugal	Azores	Terceira	Praia da Vitória	Paul da Praia da Vitória	38°44'5.915"N, 27°3'36.131"W	38.735	-27.06	WGS84	6	10	2016.1.7	2016	LIFECWR TEAM	2	Animalia	Chordata	Aves	Anseriformes	Anatidae	Anas	discors		Anas discors	Linnaeus, 1766	Anas discors Linnaeus, 1766	species	Sofia Goulart, Mariana R. Brito and Sónia Santos	2016
8154	FieldObservation	https://creativecommons.org/licenses/by/4.0/legalcode	UAc	0a80feca-b411-428a-a34e-c5c2fa07cdba	Birds from Praia da Vitória marshes (Terceira, Azores, Portugal)	ObservedSpecimen	Palearctic	Portugal	Azores	Terceira	Praia da Vitória	Paul da Pedreira do Cabo da Praia	38°42'15,538"N, 27°2'47,222"W	38.7043	-27.0465	WGS84	3	10	2016.11.7	2016	LIFECWR TEAM	1	Animalia	Chordata	Aves	Anseriformes	Anatidae	Anas	discors		Anas discors	Linnaeus, 1766	Anas discors Linnaeus, 1766	species	Sofia Goulart, Mariana R. Brito and Sónia Santos	2016
8242	FieldObservation	https://creativecommons.org/licenses/by/4.0/legalcode	UAc	0a80feca-b411-428a-a34e-c5c2fa07cdba	Birds from Praia da Vitória marshes (Terceira, Azores, Portugal)	ObservedSpecimen	Palearctic	Portugal	Azores	Terceira	Praia da Vitória	Paul da Praia da Vitória	38°44'5.915"N, 27°3'36.131"W	38.735	-27.06	WGS84	6	10	2016.2.1	2016	LIFECWR TEAM	2	Animalia	Chordata	Aves	Anseriformes	Anatidae	Anas	discors		Anas discors	Linnaeus, 1766	Anas discors Linnaeus, 1766	species	Sofia Goulart, Mariana R. Brito and Sónia Santos	2016
8270	FieldObservation	https://creativecommons.org/licenses/by/4.0/legalcode	UAc	0a80feca-b411-428a-a34e-c5c2fa07cdba	Birds from Praia da Vitória marshes (Terceira, Azores, Portugal)	ObservedSpecimen	Palearctic	Portugal	Azores	Terceira	Praia da Vitória	Paul da Praia da Vitória	38°44'5.915"N, 27°3'36.131"W	38.735	-27.06	WGS84	6	10	2016.2.10	2016	LIFECWR TEAM	1	Animalia	Chordata	Aves	Anseriformes	Anatidae	Anas	discors		Anas discors	Linnaeus, 1766	Anas discors Linnaeus, 1766	species	Sofia Goulart, Mariana R. Brito and Sónia Santos	2016
8426	FieldObservation	https://creativecommons.org/licenses/by/4.0/legalcode	UAc	0a80feca-b411-428a-a34e-c5c2fa07cdba	Birds from Praia da Vitória marshes (Terceira, Azores, Portugal)	ObservedSpecimen	Palearctic	Portugal	Azores	Terceira	Praia da Vitória	Paul da Praia da Vitória	38°44'5.915"N, 27°3'36.131"W	38.735	-27.06	WGS84	6	10	2016.2.2	2016	LIFECWR TEAM	2	Animalia	Chordata	Aves	Anseriformes	Anatidae	Anas	discors		Anas discors	Linnaeus, 1766	Anas discors Linnaeus, 1766	species	Sofia Goulart, Mariana R. Brito and Sónia Santos	2016
8480	FieldObservation	https://creativecommons.org/licenses/by/4.0/legalcode	UAc	0a80feca-b411-428a-a34e-c5c2fa07cdba	Birds from Praia da Vitória marshes (Terceira, Azores, Portugal)	ObservedSpecimen	Palearctic	Portugal	Azores	Terceira	Praia da Vitória	Paul da Pedreira do Cabo da Praia	38°42'15,538"N, 27°2'47,222"W	38.7043	-27.0465	WGS84	3	10	2016.2.23	2016	LIFECWR TEAM	1	Animalia	Chordata	Aves	Anseriformes	Anatidae	Anas	discors		Anas discors	Linnaeus, 1766	Anas discors Linnaeus, 1766	species	Sofia Goulart, Mariana R. Brito and Sónia Santos	2016
8505	FieldObservation	https://creativecommons.org/licenses/by/4.0/legalcode	UAc	0a80feca-b411-428a-a34e-c5c2fa07cdba	Birds from Praia da Vitória marshes (Terceira, Azores, Portugal)	ObservedSpecimen	Palearctic	Portugal	Azores	Terceira	Praia da Vitória	Paul da Praia da Vitória	38°44'5.915"N, 27°3'36.131"W	38.735	-27.06	WGS84	6	10	2016.2.24	2016	LIFECWR TEAM	2	Animalia	Chordata	Aves	Anseriformes	Anatidae	Anas	discors		Anas discors	Linnaeus, 1766	Anas discors Linnaeus, 1766	species	Sofia Goulart, Mariana R. Brito and Sónia Santos	2016
8583	FieldObservation	https://creativecommons.org/licenses/by/4.0/legalcode	UAc	0a80feca-b411-428a-a34e-c5c2fa07cdba	Birds from Praia da Vitória marshes (Terceira, Azores, Portugal)	ObservedSpecimen	Palearctic	Portugal	Azores	Terceira	Praia da Vitória	Paul da Praia da Vitória	38°44'5.915"N, 27°3'36.131"W	38.735	-27.06	WGS84	6	10	2016.2.4	2016	LIFECWR TEAM	1	Animalia	Chordata	Aves	Anseriformes	Anatidae	Anas	discors		Anas discors	Linnaeus, 1766	Anas discors Linnaeus, 1766	species	Sofia Goulart, Mariana R. Brito and Sónia Santos	2016
8607	FieldObservation	https://creativecommons.org/licenses/by/4.0/legalcode	UAc	0a80feca-b411-428a-a34e-c5c2fa07cdba	Birds from Praia da Vitória marshes (Terceira, Azores, Portugal)	ObservedSpecimen	Palearctic	Portugal	Azores	Terceira	Praia da Vitória	Paul da Praia da Vitória	38°44'5.915"N, 27°3'36.131"W	38.735	-27.06	WGS84	6	10	2016.2.5	2016	LIFECWR TEAM	2	Animalia	Chordata	Aves	Anseriformes	Anatidae	Anas	discors		Anas discors	Linnaeus, 1766	Anas discors Linnaeus, 1766	species	Sofia Goulart, Mariana R. Brito and Sónia Santos	2016
8634	FieldObservation	https://creativecommons.org/licenses/by/4.0/legalcode	UAc	0a80feca-b411-428a-a34e-c5c2fa07cdba	Birds from Praia da Vitória marshes (Terceira, Azores, Portugal)	ObservedSpecimen	Palearctic	Portugal	Azores	Terceira	Praia da Vitória	Paul da Praia da Vitória	38°44'5.915"N, 27°3'36.131"W	38.735	-27.06	WGS84	6	10	2016.2.8	2016	LIFECWR TEAM	2	Animalia	Chordata	Aves	Anseriformes	Anatidae	Anas	discors		Anas discors	Linnaeus, 1766	Anas discors Linnaeus, 1766	species	Sofia Goulart, Mariana R. Brito and Sónia Santos	2016
8767	FieldObservation	https://creativecommons.org/licenses/by/4.0/legalcode	UAc	0a80feca-b411-428a-a34e-c5c2fa07cdba	Birds from Praia da Vitória marshes (Terceira, Azores, Portugal)	ObservedSpecimen	Palearctic	Portugal	Azores	Terceira	Praia da Vitória	Paul da Praia da Vitória	38°44'5.915"N, 27°3'36.131"W	38.735	-27.06	WGS84	6	10	2016.3.16	2016	LIFECWR TEAM	2	Animalia	Chordata	Aves	Anseriformes	Anatidae	Anas	discors		Anas discors	Linnaeus, 1766	Anas discors Linnaeus, 1766	species	Sofia Goulart, Mariana R. Brito and Sónia Santos	2016
8807	FieldObservation	https://creativecommons.org/licenses/by/4.0/legalcode	UAc	0a80feca-b411-428a-a34e-c5c2fa07cdba	Birds from Praia da Vitória marshes (Terceira, Azores, Portugal)	ObservedSpecimen	Palearctic	Portugal	Azores	Terceira	Praia da Vitória	Paul da Praia da Vitória	38°44'5.915"N, 27°3'36.131"W	38.735	-27.06	WGS84	6	10	2016.3.18	2016	LIFECWR TEAM	2	Animalia	Chordata	Aves	Anseriformes	Anatidae	Anas	discors		Anas discors	Linnaeus, 1766	Anas discors Linnaeus, 1766	species	Sofia Goulart, Mariana R. Brito and Sónia Santos	2016
8834	FieldObservation	https://creativecommons.org/licenses/by/4.0/legalcode	UAc	0a80feca-b411-428a-a34e-c5c2fa07cdba	Birds from Praia da Vitória marshes (Terceira, Azores, Portugal)	ObservedSpecimen	Palearctic	Portugal	Azores	Terceira	Praia da Vitória	Paul da Praia da Vitória	38°44'5.915"N, 27°3'36.131"W	38.735	-27.06	WGS84	6	10	2016.3.2	2016	LIFECWR TEAM	1	Animalia	Chordata	Aves	Anseriformes	Anatidae	Anas	discors		Anas discors	Linnaeus, 1766	Anas discors Linnaeus, 1766	species	Sofia Goulart, Mariana R. Brito and Sónia Santos	2016
8961	FieldObservation	https://creativecommons.org/licenses/by/4.0/legalcode	UAc	0a80feca-b411-428a-a34e-c5c2fa07cdba	Birds from Praia da Vitória marshes (Terceira, Azores, Portugal)	ObservedSpecimen	Palearctic	Portugal	Azores	Terceira	Praia da Vitória	Paul da Praia da Vitória	38°44'5.915"N, 27°3'36.131"W	38.735	-27.06	WGS84	6	10	2016.3.30	2016	LIFECWR TEAM	2	Animalia	Chordata	Aves	Anseriformes	Anatidae	Anas	discors		Anas discors	Linnaeus, 1766	Anas discors Linnaeus, 1766	species	Sofia Goulart, Mariana R. Brito and Sónia Santos	2016
9035	FieldObservation	https://creativecommons.org/licenses/by/4.0/legalcode	UAc	0a80feca-b411-428a-a34e-c5c2fa07cdba	Birds from Praia da Vitória marshes (Terceira, Azores, Portugal)	ObservedSpecimen	Palearctic	Portugal	Azores	Terceira	Praia da Vitória	Paul da Praia da Vitória	38°44'5.915"N, 27°3'36.131"W	38.735	-27.06	WGS84	6	10	2016.3.7	2016	LIFECWR TEAM	2	Animalia	Chordata	Aves	Anseriformes	Anatidae	Anas	discors		Anas discors	Linnaeus, 1766	Anas discors Linnaeus, 1766	species	Sofia Goulart, Mariana R. Brito and Sónia Santos	2016
9088	FieldObservation	https://creativecommons.org/licenses/by/4.0/legalcode	UAc	0a80feca-b411-428a-a34e-c5c2fa07cdba	Birds from Praia da Vitória marshes (Terceira, Azores, Portugal)	ObservedSpecimen	Palearctic	Portugal	Azores	Terceira	Praia da Vitória	Paul da Praia da Vitória	38°44'5.915"N, 27°3'36.131"W	38.735	-27.06	WGS84	6	10	2016.3.9	2016	LIFECWR TEAM	1	Animalia	Chordata	Aves	Anseriformes	Anatidae	Anas	discors		Anas discors	Linnaeus, 1766	Anas discors Linnaeus, 1766	species	Sofia Goulart, Mariana R. Brito and Sónia Santos	2016
9126	FieldObservation	https://creativecommons.org/licenses/by/4.0/legalcode	UAc	0a80feca-b411-428a-a34e-c5c2fa07cdba	Birds from Praia da Vitória marshes (Terceira, Azores, Portugal)	ObservedSpecimen	Palearctic	Portugal	Azores	Terceira	Praia da Vitória	Paul da Praia da Vitória	38°44'5.915"N, 27°3'36.131"W	38.735	-27.06	WGS84	6	10	2016.4.12	2016	LIFECWR TEAM	2	Animalia	Chordata	Aves	Anseriformes	Anatidae	Anas	discors		Anas discors	Linnaeus, 1766	Anas discors Linnaeus, 1766	species	Sofia Goulart, Mariana R. Brito and Sónia Santos	2016
9260	FieldObservation	https://creativecommons.org/licenses/by/4.0/legalcode	UAc	0a80feca-b411-428a-a34e-c5c2fa07cdba	Birds from Praia da Vitória marshes (Terceira, Azores, Portugal)	ObservedSpecimen	Palearctic	Portugal	Azores	Terceira	Praia da Vitória	Paul da Praia da Vitória	38°44'5.915"N, 27°3'36.131"W	38.735	-27.06	WGS84	6	10	2016.4.4	2016	LIFECWR TEAM	2	Animalia	Chordata	Aves	Anseriformes	Anatidae	Anas	discors		Anas discors	Linnaeus, 1766	Anas discors Linnaeus, 1766	species	Sofia Goulart, Mariana R. Brito and Sónia Santos	2016
9285	FieldObservation	https://creativecommons.org/licenses/by/4.0/legalcode	UAc	0a80feca-b411-428a-a34e-c5c2fa07cdba	Birds from Praia da Vitória marshes (Terceira, Azores, Portugal)	ObservedSpecimen	Palearctic	Portugal	Azores	Terceira	Praia da Vitória	Paul da Praia da Vitória	38°44'5.915"N, 27°3'36.131"W	38.735	-27.06	WGS84	6	10	2016.4.5	2016	LIFECWR TEAM	2	Animalia	Chordata	Aves	Anseriformes	Anatidae	Anas	discors		Anas discors	Linnaeus, 1766	Anas discors Linnaeus, 1766	species	Sofia Goulart, Mariana R. Brito and Sónia Santos	2016
9786	FieldObservation	https://creativecommons.org/licenses/by/4.0/legalcode	UAc	0a80feca-b411-428a-a34e-c5c2fa07cdba	Birds from Praia da Vitória marshes (Terceira, Azores, Portugal)	ObservedSpecimen	Palearctic	Portugal	Azores	Terceira	Praia da Vitória	Paul da Praia da Vitória	38°44'5.915"N, 27°3'36.131"W	38.735	-27.06	WGS84	6	10	2017.1.17	2017	LIFECWR TEAM	1	Animalia	Chordata	Aves	Anseriformes	Anatidae	Anas	discors		Anas discors	Linnaeus, 1766	Anas discors Linnaeus, 1766	species	Sofia Goulart, Mariana R. Brito and Sónia Santos	2017
9883	FieldObservation	https://creativecommons.org/licenses/by/4.0/legalcode	UAc	0a80feca-b411-428a-a34e-c5c2fa07cdba	Birds from Praia da Vitória marshes (Terceira, Azores, Portugal)	ObservedSpecimen	Palearctic	Portugal	Azores	Terceira	Praia da Vitória	Paul da Pedreira do Cabo da Praia	38°42'15,538"N, 27°2'47,222"W	38.7043	-27.0465	WGS84	3	10	2017.10.18	2017	LIFECWR TEAM	2	Animalia	Chordata	Aves	Anseriformes	Anatidae	Anas	discors		Anas discors	Linnaeus, 1766	Anas discors Linnaeus, 1766	species	Sofia Goulart, Mariana R. Brito and Sónia Santos	2017
9931	FieldObservation	https://creativecommons.org/licenses/by/4.0/legalcode	UAc	0a80feca-b411-428a-a34e-c5c2fa07cdba	Birds from Praia da Vitória marshes (Terceira, Azores, Portugal)	ObservedSpecimen	Palearctic	Portugal	Azores	Terceira	Praia da Vitória	Paul da Pedreira do Cabo da Praia	38°42'15,538"N, 27°2'47,222"W	38.7043	-27.0465	WGS84	3	10	2017.10.20	2017	LIFECWR TEAM	2	Animalia	Chordata	Aves	Anseriformes	Anatidae	Anas	discors		Anas discors	Linnaeus, 1766	Anas discors Linnaeus, 1766	species	Sofia Goulart, Mariana R. Brito and Sónia Santos	2017
9961	FieldObservation	https://creativecommons.org/licenses/by/4.0/legalcode	UAc	0a80feca-b411-428a-a34e-c5c2fa07cdba	Birds from Praia da Vitória marshes (Terceira, Azores, Portugal)	ObservedSpecimen	Palearctic	Portugal	Azores	Terceira	Praia da Vitória	Paul da Pedreira do Cabo da Praia	38°42'15,538"N, 27°2'47,222"W	38.7043	-27.0465	WGS84	3	10	2017.10.24	2017	LIFECWR TEAM	2	Animalia	Chordata	Aves	Anseriformes	Anatidae	Anas	discors		Anas discors	Linnaeus, 1766	Anas discors Linnaeus, 1766	species	Sofia Goulart, Mariana R. Brito and Sónia Santos	2017
9982	FieldObservation	https://creativecommons.org/licenses/by/4.0/legalcode	UAc	0a80feca-b411-428a-a34e-c5c2fa07cdba	Birds from Praia da Vitória marshes (Terceira, Azores, Portugal)	ObservedSpecimen	Palearctic	Portugal	Azores	Terceira	Praia da Vitória	Paul da Pedreira do Cabo da Praia	38°42'15,538"N, 27°2'47,222"W	38.7043	-27.0465	WGS84	3	10	2017.10.25	2017	LIFECWR TEAM	2	Animalia	Chordata	Aves	Anseriformes	Anatidae	Anas	discors		Anas discors	Linnaeus, 1766	Anas discors Linnaeus, 1766	species	Sofia Goulart, Mariana R. Brito and Sónia Santos	2017
10008	FieldObservation	https://creativecommons.org/licenses/by/4.0/legalcode	UAc	0a80feca-b411-428a-a34e-c5c2fa07cdba	Birds from Praia da Vitória marshes (Terceira, Azores, Portugal)	ObservedSpecimen	Palearctic	Portugal	Azores	Terceira	Praia da Vitória	Paul da Pedreira do Cabo da Praia	38°42'15,538"N, 27°2'47,222"W	38.7043	-27.0465	WGS84	3	10	2017.10.26	2017	LIFECWR TEAM	2	Animalia	Chordata	Aves	Anseriformes	Anatidae	Anas	discors		Anas discors	Linnaeus, 1766	Anas discors Linnaeus, 1766	species	Sofia Goulart, Mariana R. Brito and Sónia Santos	2017
10046	FieldObservation	https://creativecommons.org/licenses/by/4.0/legalcode	UAc	0a80feca-b411-428a-a34e-c5c2fa07cdba	Birds from Praia da Vitória marshes (Terceira, Azores, Portugal)	ObservedSpecimen	Palearctic	Portugal	Azores	Terceira	Praia da Vitória	Paul da Pedreira do Cabo da Praia	38°42'15,538"N, 27°2'47,222"W	38.7043	-27.0465	WGS84	3	10	2017.10.31	2017	LIFECWR TEAM	2	Animalia	Chordata	Aves	Anseriformes	Anatidae	Anas	discors		Anas discors	Linnaeus, 1766	Anas discors Linnaeus, 1766	species	Sofia Goulart, Mariana R. Brito and Sónia Santos	2017
10075	FieldObservation	https://creativecommons.org/licenses/by/4.0/legalcode	UAc	0a80feca-b411-428a-a34e-c5c2fa07cdba	Birds from Praia da Vitória marshes (Terceira, Azores, Portugal)	ObservedSpecimen	Palearctic	Portugal	Azores	Terceira	Praia da Vitória	Paul da Pedreira do Cabo da Praia	38°42'15,538"N, 27°2'47,222"W	38.7043	-27.0465	WGS84	3	10	2017.10.6	2017	LIFECWR TEAM	2	Animalia	Chordata	Aves	Anseriformes	Anatidae	Anas	discors		Anas discors	Linnaeus, 1766	Anas discors Linnaeus, 1766	species	Sofia Goulart, Mariana R. Brito and Sónia Santos	2017
10105	FieldObservation	https://creativecommons.org/licenses/by/4.0/legalcode	UAc	0a80feca-b411-428a-a34e-c5c2fa07cdba	Birds from Praia da Vitória marshes (Terceira, Azores, Portugal)	ObservedSpecimen	Palearctic	Portugal	Azores	Terceira	Praia da Vitória	Paul da Pedreira do Cabo da Praia	38°42'15,538"N, 27°2'47,222"W	38.7043	-27.0465	WGS84	3	10	2017.10.9	2017	LIFECWR TEAM	2	Animalia	Chordata	Aves	Anseriformes	Anatidae	Anas	discors		Anas discors	Linnaeus, 1766	Anas discors Linnaeus, 1766	species	Sofia Goulart, Mariana R. Brito and Sónia Santos	2017
10136	FieldObservation	https://creativecommons.org/licenses/by/4.0/legalcode	UAc	0a80feca-b411-428a-a34e-c5c2fa07cdba	Birds from Praia da Vitória marshes (Terceira, Azores, Portugal)	ObservedSpecimen	Palearctic	Portugal	Azores	Terceira	Praia da Vitória	Paul da Pedreira do Cabo da Praia	38°42'15,538"N, 27°2'47,222"W	38.7043	-27.0465	WGS84	3	10	2017.11.10	2017	LIFECWR TEAM	3	Animalia	Chordata	Aves	Anseriformes	Anatidae	Anas	discors		Anas discors	Linnaeus, 1766	Anas discors Linnaeus, 1766	species	Sofia Goulart, Mariana R. Brito and Sónia Santos	2017
10168	FieldObservation	https://creativecommons.org/licenses/by/4.0/legalcode	UAc	0a80feca-b411-428a-a34e-c5c2fa07cdba	Birds from Praia da Vitória marshes (Terceira, Azores, Portugal)	ObservedSpecimen	Palearctic	Portugal	Azores	Terceira	Praia da Vitória	Paul da Pedreira do Cabo da Praia	38°42'15,538"N, 27°2'47,222"W	38.7043	-27.0465	WGS84	3	10	2017.11.13	2017	LIFECWR TEAM	2	Animalia	Chordata	Aves	Anseriformes	Anatidae	Anas	discors		Anas discors	Linnaeus, 1766	Anas discors Linnaeus, 1766	species	Sofia Goulart, Mariana R. Brito and Sónia Santos	2017
10169	FieldObservation	https://creativecommons.org/licenses/by/4.0/legalcode	UAc	0a80feca-b411-428a-a34e-c5c2fa07cdba	Birds from Praia da Vitória marshes (Terceira, Azores, Portugal)	ObservedSpecimen	Palearctic	Portugal	Azores	Terceira	Praia da Vitória	Paul da Praia da Vitória	38°44'5.915"N, 27°3'36.131"W	38.735	-27.06	WGS84	6	10	2017.11.13	2017	LIFECWR TEAM	2	Animalia	Chordata	Aves	Anseriformes	Anatidae	Anas	discors		Anas discors	Linnaeus, 1766	Anas discors Linnaeus, 1766	species	Sofia Goulart, Mariana R. Brito and Sónia Santos	2017
10265	FieldObservation	https://creativecommons.org/licenses/by/4.0/legalcode	UAc	0a80feca-b411-428a-a34e-c5c2fa07cdba	Birds from Praia da Vitória marshes (Terceira, Azores, Portugal)	ObservedSpecimen	Palearctic	Portugal	Azores	Terceira	Praia da Vitória	Paul da Praia da Vitória	38°44'5.915"N, 27°3'36.131"W	38.735	-27.06	WGS84	6	10	2017.11.2	2017	LIFECWR TEAM	2	Animalia	Chordata	Aves	Anseriformes	Anatidae	Anas	discors		Anas discors	Linnaeus, 1766	Anas discors Linnaeus, 1766	species	Sofia Goulart, Mariana R. Brito and Sónia Santos	2017
10419	FieldObservation	https://creativecommons.org/licenses/by/4.0/legalcode	UAc	0a80feca-b411-428a-a34e-c5c2fa07cdba	Birds from Praia da Vitória marshes (Terceira, Azores, Portugal)	ObservedSpecimen	Palearctic	Portugal	Azores	Terceira	Praia da Vitória	Paul da Pedreira do Cabo da Praia	38°42'15,538"N, 27°2'47,222"W	38.7043	-27.0465	WGS84	3	10	2017.11.8	2017	LIFECWR TEAM	2	Animalia	Chordata	Aves	Anseriformes	Anatidae	Anas	discors		Anas discors	Linnaeus, 1766	Anas discors Linnaeus, 1766	species	Sofia Goulart, Mariana R. Brito and Sónia Santos	2017
10442	FieldObservation	https://creativecommons.org/licenses/by/4.0/legalcode	UAc	0a80feca-b411-428a-a34e-c5c2fa07cdba	Birds from Praia da Vitória marshes (Terceira, Azores, Portugal)	ObservedSpecimen	Palearctic	Portugal	Azores	Terceira	Praia da Vitória	Paul da Pedreira do Cabo da Praia	38°42'15,538"N, 27°2'47,222"W	38.7043	-27.0465	WGS84	3	10	2017.11.9	2017	LIFECWR TEAM	2	Animalia	Chordata	Aves	Anseriformes	Anatidae	Anas	discors		Anas discors	Linnaeus, 1766	Anas discors Linnaeus, 1766	species	Sofia Goulart, Mariana R. Brito and Sónia Santos	2017
10463	FieldObservation	https://creativecommons.org/licenses/by/4.0/legalcode	UAc	0a80feca-b411-428a-a34e-c5c2fa07cdba	Birds from Praia da Vitória marshes (Terceira, Azores, Portugal)	ObservedSpecimen	Palearctic	Portugal	Azores	Terceira	Praia da Vitória	Paul da Praia da Vitória	38°44'5.915"N, 27°3'36.131"W	38.735	-27.06	WGS84	6	10	2017.12.14	2017	LIFECWR TEAM	2	Animalia	Chordata	Aves	Anseriformes	Anatidae	Anas	discors		Anas discors	Linnaeus, 1766	Anas discors Linnaeus, 1766	species	Sofia Goulart, Mariana R. Brito and Sónia Santos	2017
10601	FieldObservation	https://creativecommons.org/licenses/by/4.0/legalcode	UAc	0a80feca-b411-428a-a34e-c5c2fa07cdba	Birds from Praia da Vitória marshes (Terceira, Azores, Portugal)	ObservedSpecimen	Palearctic	Portugal	Azores	Terceira	Praia da Vitória	Paul da Praia da Vitória	38°44'5.915"N, 27°3'36.131"W	38.735	-27.06	WGS84	6	10	2017.12.7	2017	LIFECWR TEAM	2	Animalia	Chordata	Aves	Anseriformes	Anatidae	Anas	discors		Anas discors	Linnaeus, 1766	Anas discors Linnaeus, 1766	species	Sofia Goulart, Mariana R. Brito and Sónia Santos	2017
10662	FieldObservation	https://creativecommons.org/licenses/by/4.0/legalcode	UAc	0a80feca-b411-428a-a34e-c5c2fa07cdba	Birds from Praia da Vitória marshes (Terceira, Azores, Portugal)	ObservedSpecimen	Palearctic	Portugal	Azores	Terceira	Praia da Vitória	Paul da Pedreira do Cabo da Praia	38°42'15,538"N, 27°2'47,222"W	38.7043	-27.0465	WGS84	3	10	2017.2.23	2017	LIFECWR TEAM	2	Animalia	Chordata	Aves	Anseriformes	Anatidae	Anas	discors		Anas discors	Linnaeus, 1766	Anas discors Linnaeus, 1766	species	Sofia Goulart, Mariana R. Brito and Sónia Santos	2017
10679	FieldObservation	https://creativecommons.org/licenses/by/4.0/legalcode	UAc	0a80feca-b411-428a-a34e-c5c2fa07cdba	Birds from Praia da Vitória marshes (Terceira, Azores, Portugal)	ObservedSpecimen	Palearctic	Portugal	Azores	Terceira	Praia da Vitória	Paul da Pedreira do Cabo da Praia	38°42'15,538"N, 27°2'47,222"W	38.7043	-27.0465	WGS84	3	10	2017.2.24	2017	LIFECWR TEAM	2	Animalia	Chordata	Aves	Anseriformes	Anatidae	Anas	discors		Anas discors	Linnaeus, 1766	Anas discors Linnaeus, 1766	species	Sofia Goulart, Mariana R. Brito and Sónia Santos	2017
10767	FieldObservation	https://creativecommons.org/licenses/by/4.0/legalcode	UAc	0a80feca-b411-428a-a34e-c5c2fa07cdba	Birds from Praia da Vitória marshes (Terceira, Azores, Portugal)	ObservedSpecimen	Palearctic	Portugal	Azores	Terceira	Praia da Vitória	Paul da Pedreira do Cabo da Praia	38°42'15,538"N, 27°2'47,222"W	38.7043	-27.0465	WGS84	3	10	2017.3.13	2017	LIFECWR TEAM	2	Animalia	Chordata	Aves	Anseriformes	Anatidae	Anas	discors		Anas discors	Linnaeus, 1766	Anas discors Linnaeus, 1766	species	Sofia Goulart, Mariana R. Brito and Sónia Santos	2017
10783	FieldObservation	https://creativecommons.org/licenses/by/4.0/legalcode	UAc	0a80feca-b411-428a-a34e-c5c2fa07cdba	Birds from Praia da Vitória marshes (Terceira, Azores, Portugal)	ObservedSpecimen	Palearctic	Portugal	Azores	Terceira	Praia da Vitória	Paul da Pedreira do Cabo da Praia	38°42'15,538"N, 27°2'47,222"W	38.7043	-27.0465	WGS84	3	10	2017.3.14	2017	LIFECWR TEAM	2	Animalia	Chordata	Aves	Anseriformes	Anatidae	Anas	discors		Anas discors	Linnaeus, 1766	Anas discors Linnaeus, 1766	species	Sofia Goulart, Mariana R. Brito and Sónia Santos	2017
12118	FieldObservation	https://creativecommons.org/licenses/by/4.0/legalcode	UAc	0a80feca-b411-428a-a34e-c5c2fa07cdba	Birds from Praia da Vitória marshes (Terceira, Azores, Portugal)	ObservedSpecimen	Palearctic	Portugal	Azores	Terceira	Praia da Vitória	Paul da Praia da Vitória	38°44'5.915"N, 27°3'36.131"W	38.735	-27.06	WGS84	6	10	2018.1.15	2018	LIFECWR TEAM	2	Animalia	Chordata	Aves	Anseriformes	Anatidae	Anas	discors		Anas discors	Linnaeus, 1766	Anas discors Linnaeus, 1766	species	Sofia Goulart, Mariana R. Brito and Sónia Santos	2018
12147	FieldObservation	https://creativecommons.org/licenses/by/4.0/legalcode	UAc	0a80feca-b411-428a-a34e-c5c2fa07cdba	Birds from Praia da Vitória marshes (Terceira, Azores, Portugal)	ObservedSpecimen	Palearctic	Portugal	Azores	Terceira	Praia da Vitória	Paul da Praia da Vitória	38°44'5.915"N, 27°3'36.131"W	38.735	-27.06	WGS84	6	10	2018.1.8	2018	LIFECWR TEAM	1	Animalia	Chordata	Aves	Anseriformes	Anatidae	Anas	discors		Anas discors	Linnaeus, 1766	Anas discors Linnaeus, 1766	species	Sofia Goulart, Mariana R. Brito and Sónia Santos	2018
207	FieldObservation	https://creativecommons.org/licenses/by/4.0/legalcode	UAc	0a80feca-b411-428a-a34e-c5c2fa07cdba	Birds from Praia da Vitória marshes (Terceira, Azores, Portugal)	ObservedSpecimen	Palearctic	Portugal	Azores	Terceira	Praia da Vitória	Paul da Praia da Vitória	38°44'5.915"N, 27°3'36.131"W	38.735	-27.06	WGS84	6	10	2018.02.08	2018	LIFECWR TEAM	1	Animalia	Chordata	Aves	Anseriformes	Anatidae	Anas	penelope		Anas penelope	Linnaeus, 1758	Anas penelope Linnaeus, 1758	species	Sofia Goulart, Mariana R. Brito and Sónia Santos	2018
382	FieldObservation	https://creativecommons.org/licenses/by/4.0/legalcode	UAc	0a80feca-b411-428a-a34e-c5c2fa07cdba	Birds from Praia da Vitória marshes (Terceira, Azores, Portugal)	ObservedSpecimen	Palearctic	Portugal	Azores	Terceira	Praia da Vitória	Paul da Praia da Vitória	38°44'5.915"N, 27°3'36.131"W	38.735	-27.06	WGS84	6	10	2018.02.15	2018	LIFECWR TEAM	1	Animalia	Chordata	Aves	Anseriformes	Anatidae	Anas	penelope		Anas penelope	Linnaeus, 1758	Anas penelope Linnaeus, 1758	species	Sofia Goulart, Mariana R. Brito and Sónia Santos	2018
626	FieldObservation	https://creativecommons.org/licenses/by/4.0/legalcode	UAc	0a80feca-b411-428a-a34e-c5c2fa07cdba	Birds from Praia da Vitória marshes (Terceira, Azores, Portugal)	ObservedSpecimen	Palearctic	Portugal	Azores	Terceira	Praia da Vitória	Paul da Pedreira do Cabo da Praia	38°42'15,538"N, 27°2'47,222"W	38.7043	-27.0465	WGS84	3	10	2013.10.10	2013	LIFECWR TEAM	1	Animalia	Chordata	Aves	Anseriformes	Anatidae	Anas	penelope		Anas penelope	Linnaeus, 1758	Anas penelope Linnaeus, 1758	species	Sofia Goulart, Mariana R. Brito and Sónia Santos	2013
686	FieldObservation	https://creativecommons.org/licenses/by/4.0/legalcode	UAc	0a80feca-b411-428a-a34e-c5c2fa07cdba	Birds from Praia da Vitória marshes (Terceira, Azores, Portugal)	ObservedSpecimen	Palearctic	Portugal	Azores	Terceira	Praia da Vitória	Paul da Pedreira do Cabo da Praia	38°42'15,538"N, 27°2'47,222"W	38.7043	-27.0465	WGS84	3	10	2013.10.16	2013	LIFECWR TEAM	1	Animalia	Chordata	Aves	Anseriformes	Anatidae	Anas	penelope		Anas penelope	Linnaeus, 1758	Anas penelope Linnaeus, 1758	species	Sofia Goulart, Mariana R. Brito and Sónia Santos	2013
709	FieldObservation	https://creativecommons.org/licenses/by/4.0/legalcode	UAc	0a80feca-b411-428a-a34e-c5c2fa07cdba	Birds from Praia da Vitória marshes (Terceira, Azores, Portugal)	ObservedSpecimen	Palearctic	Portugal	Azores	Terceira	Praia da Vitória	Paul da Pedreira do Cabo da Praia	38°42'15,538"N, 27°2'47,222"W	38.7043	-27.0465	WGS84	3	10	2013.10.17	2013	LIFECWR TEAM	1	Animalia	Chordata	Aves	Anseriformes	Anatidae	Anas	penelope		Anas penelope	Linnaeus, 1758	Anas penelope Linnaeus, 1758	species	Sofia Goulart, Mariana R. Brito and Sónia Santos	2013
734	FieldObservation	https://creativecommons.org/licenses/by/4.0/legalcode	UAc	0a80feca-b411-428a-a34e-c5c2fa07cdba	Birds from Praia da Vitória marshes (Terceira, Azores, Portugal)	ObservedSpecimen	Palearctic	Portugal	Azores	Terceira	Praia da Vitória	Paul da Pedreira do Cabo da Praia	38°42'15,538"N, 27°2'47,222"W	38.7043	-27.0465	WGS84	3	10	2013.10.18	2013	LIFECWR TEAM	1	Animalia	Chordata	Aves	Anseriformes	Anatidae	Anas	penelope		Anas penelope	Linnaeus, 1758	Anas penelope Linnaeus, 1758	species	Sofia Goulart, Mariana R. Brito and Sónia Santos	2013
842	FieldObservation	https://creativecommons.org/licenses/by/4.0/legalcode	UAc	0a80feca-b411-428a-a34e-c5c2fa07cdba	Birds from Praia da Vitória marshes (Terceira, Azores, Portugal)	ObservedSpecimen	Palearctic	Portugal	Azores	Terceira	Praia da Vitória	Paul da Pedreira do Cabo da Praia	38°42'15,538"N, 27°2'47,222"W	38.7043	-27.0465	WGS84	3	10	2013.10.25	2013	LIFECWR TEAM	1	Animalia	Chordata	Aves	Anseriformes	Anatidae	Anas	penelope		Anas penelope	Linnaeus, 1758	Anas penelope Linnaeus, 1758	species	Sofia Goulart, Mariana R. Brito and Sónia Santos	2013
859	FieldObservation	https://creativecommons.org/licenses/by/4.0/legalcode	UAc	0a80feca-b411-428a-a34e-c5c2fa07cdba	Birds from Praia da Vitória marshes (Terceira, Azores, Portugal)	ObservedSpecimen	Palearctic	Portugal	Azores	Terceira	Praia da Vitória	Paul da Pedreira do Cabo da Praia	38°42'15,538"N, 27°2'47,222"W	38.7043	-27.0465	WGS84	3	10	2013.10.28	2013	LIFECWR TEAM	1	Animalia	Chordata	Aves	Anseriformes	Anatidae	Anas	penelope		Anas penelope	Linnaeus, 1758	Anas penelope Linnaeus, 1758	species	Sofia Goulart, Mariana R. Brito and Sónia Santos	2013
932	FieldObservation	https://creativecommons.org/licenses/by/4.0/legalcode	UAc	0a80feca-b411-428a-a34e-c5c2fa07cdba	Birds from Praia da Vitória marshes (Terceira, Azores, Portugal)	ObservedSpecimen	Palearctic	Portugal	Azores	Terceira	Praia da Vitória	Paul da Pedreira do Cabo da Praia	38°42'15,538"N, 27°2'47,222"W	38.7043	-27.0465	WGS84	3	10	2013.10.31	2013	LIFECWR TEAM	1	Animalia	Chordata	Aves	Anseriformes	Anatidae	Anas	penelope		Anas penelope	Linnaeus, 1758	Anas penelope Linnaeus, 1758	species	Sofia Goulart, Mariana R. Brito and Sónia Santos	2013
1005	FieldObservation	https://creativecommons.org/licenses/by/4.0/legalcode	UAc	0a80feca-b411-428a-a34e-c5c2fa07cdba	Birds from Praia da Vitória marshes (Terceira, Azores, Portugal)	ObservedSpecimen	Palearctic	Portugal	Azores	Terceira	Praia da Vitória	Paul da Pedreira do Cabo da Praia	38°42'15,538"N, 27°2'47,222"W	38.7043	-27.0465	WGS84	3	10	2013.11.01	2013	LIFECWR TEAM	1	Animalia	Chordata	Aves	Anseriformes	Anatidae	Anas	penelope		Anas penelope	Linnaeus, 1758	Anas penelope Linnaeus, 1758	species	Sofia Goulart, Mariana R. Brito and Sónia Santos	2013
1006	FieldObservation	https://creativecommons.org/licenses/by/4.0/legalcode	UAc	0a80feca-b411-428a-a34e-c5c2fa07cdba	Birds from Praia da Vitória marshes (Terceira, Azores, Portugal)	ObservedSpecimen	Palearctic	Portugal	Azores	Terceira	Praia da Vitória	Paul da Praia da Vitória	38°44'5.915"N, 27°3'36.131"W	38.735	-27.06	WGS84	6	10	2013.11.01	2013	LIFECWR TEAM	3	Animalia	Chordata	Aves	Anseriformes	Anatidae	Anas	penelope		Anas penelope	Linnaeus, 1758	Anas penelope Linnaeus, 1758	species	Sofia Goulart, Mariana R. Brito and Sónia Santos	2013
1027	FieldObservation	https://creativecommons.org/licenses/by/4.0/legalcode	UAc	0a80feca-b411-428a-a34e-c5c2fa07cdba	Birds from Praia da Vitória marshes (Terceira, Azores, Portugal)	ObservedSpecimen	Palearctic	Portugal	Azores	Terceira	Praia da Vitória	Paul da Praia da Vitória	38°44'5.915"N, 27°3'36.131"W	38.735	-27.06	WGS84	6	10	2013.11.11	2013	LIFECWR TEAM	4	Animalia	Chordata	Aves	Anseriformes	Anatidae	Anas	penelope		Anas penelope	Linnaeus, 1758	Anas penelope Linnaeus, 1758	species	Sofia Goulart, Mariana R. Brito and Sónia Santos	2013
1053	FieldObservation	https://creativecommons.org/licenses/by/4.0/legalcode	UAc	0a80feca-b411-428a-a34e-c5c2fa07cdba	Birds from Praia da Vitória marshes (Terceira, Azores, Portugal)	ObservedSpecimen	Palearctic	Portugal	Azores	Terceira	Praia da Vitória	Paul da Praia da Vitória	38°44'5.915"N, 27°3'36.131"W	38.735	-27.06	WGS84	6	10	2013.11.12	2013	LIFECWR TEAM	3	Animalia	Chordata	Aves	Anseriformes	Anatidae	Anas	penelope		Anas penelope	Linnaeus, 1758	Anas penelope Linnaeus, 1758	species	Sofia Goulart, Mariana R. Brito and Sónia Santos	2013
1075	FieldObservation	https://creativecommons.org/licenses/by/4.0/legalcode	UAc	0a80feca-b411-428a-a34e-c5c2fa07cdba	Birds from Praia da Vitória marshes (Terceira, Azores, Portugal)	ObservedSpecimen	Palearctic	Portugal	Azores	Terceira	Praia da Vitória	Paul da Praia da Vitória	38°44'5.915"N, 27°3'36.131"W	38.735	-27.06	WGS84	6	10	2013.11.13	2013	LIFECWR TEAM	3	Animalia	Chordata	Aves	Anseriformes	Anatidae	Anas	penelope		Anas penelope	Linnaeus, 1758	Anas penelope Linnaeus, 1758	species	Sofia Goulart, Mariana R. Brito and Sónia Santos	2013
1184	FieldObservation	https://creativecommons.org/licenses/by/4.0/legalcode	UAc	0a80feca-b411-428a-a34e-c5c2fa07cdba	Birds from Praia da Vitória marshes (Terceira, Azores, Portugal)	ObservedSpecimen	Palearctic	Portugal	Azores	Terceira	Praia da Vitória	Paul da Pedreira do Cabo da Praia	38°42'15,538"N, 27°2'47,222"W	38.7043	-27.0465	WGS84	3	10	2013.11.25	2013	LIFECWR TEAM	2	Animalia	Chordata	Aves	Anseriformes	Anatidae	Anas	penelope		Anas penelope	Linnaeus, 1758	Anas penelope Linnaeus, 1758	species	Sofia Goulart, Mariana R. Brito and Sónia Santos	2013
1204	FieldObservation	https://creativecommons.org/licenses/by/4.0/legalcode	UAc	0a80feca-b411-428a-a34e-c5c2fa07cdba	Birds from Praia da Vitória marshes (Terceira, Azores, Portugal)	ObservedSpecimen	Palearctic	Portugal	Azores	Terceira	Praia da Vitória	Paul da Praia da Vitória	38°44'5.915"N, 27°3'36.131"W	38.735	-27.06	WGS84	6	10	2013.11.26	2013	LIFECWR TEAM	1	Animalia	Chordata	Aves	Anseriformes	Anatidae	Anas	penelope		Anas penelope	Linnaeus, 1758	Anas penelope Linnaeus, 1758	species	Sofia Goulart, Mariana R. Brito and Sónia Santos	2013
1205	FieldObservation	https://creativecommons.org/licenses/by/4.0/legalcode	UAc	0a80feca-b411-428a-a34e-c5c2fa07cdba	Birds from Praia da Vitória marshes (Terceira, Azores, Portugal)	ObservedSpecimen	Palearctic	Portugal	Azores	Terceira	Praia da Vitória	Paul da Pedreira do Cabo da Praia	38°42'15,538"N, 27°2'47,222"W	38.7043	-27.0465	WGS84	3	10	2013.11.26	2013	LIFECWR TEAM	2	Animalia	Chordata	Aves	Anseriformes	Anatidae	Anas	penelope		Anas penelope	Linnaeus, 1758	Anas penelope Linnaeus, 1758	species	Sofia Goulart, Mariana R. Brito and Sónia Santos	2013
1370	FieldObservation	https://creativecommons.org/licenses/by/4.0/legalcode	UAc	0a80feca-b411-428a-a34e-c5c2fa07cdba	Birds from Praia da Vitória marshes (Terceira, Azores, Portugal)	ObservedSpecimen	Palearctic	Portugal	Azores	Terceira	Praia da Vitória	Paul da Praia da Vitória	38°44'5.915"N, 27°3'36.131"W	38.735	-27.06	WGS84	6	10	2013.12.10	2013	LIFECWR TEAM	2	Animalia	Chordata	Aves	Anseriformes	Anatidae	Anas	penelope		Anas penelope	Linnaeus, 1758	Anas penelope Linnaeus, 1758	species	Sofia Goulart, Mariana R. Brito and Sónia Santos	2013
1413	FieldObservation	https://creativecommons.org/licenses/by/4.0/legalcode	UAc	0a80feca-b411-428a-a34e-c5c2fa07cdba	Birds from Praia da Vitória marshes (Terceira, Azores, Portugal)	ObservedSpecimen	Palearctic	Portugal	Azores	Terceira	Praia da Vitória	Paul da Praia da Vitória	38°44'5.915"N, 27°3'36.131"W	38.735	-27.06	WGS84	6	10	2013.12.16	2013	LIFECWR TEAM	3	Animalia	Chordata	Aves	Anseriformes	Anatidae	Anas	penelope		Anas penelope	Linnaeus, 1758	Anas penelope Linnaeus, 1758	species	Sofia Goulart, Mariana R. Brito and Sónia Santos	2013
1433	FieldObservation	https://creativecommons.org/licenses/by/4.0/legalcode	UAc	0a80feca-b411-428a-a34e-c5c2fa07cdba	Birds from Praia da Vitória marshes (Terceira, Azores, Portugal)	ObservedSpecimen	Palearctic	Portugal	Azores	Terceira	Praia da Vitória	Paul da Praia da Vitória	38°44'5.915"N, 27°3'36.131"W	38.735	-27.06	WGS84	6	10	2013.12.17	2013	LIFECWR TEAM	6	Animalia	Chordata	Aves	Anseriformes	Anatidae	Anas	penelope		Anas penelope	Linnaeus, 1758	Anas penelope Linnaeus, 1758	species	Sofia Goulart, Mariana R. Brito and Sónia Santos	2013
1452	FieldObservation	https://creativecommons.org/licenses/by/4.0/legalcode	UAc	0a80feca-b411-428a-a34e-c5c2fa07cdba	Birds from Praia da Vitória marshes (Terceira, Azores, Portugal)	ObservedSpecimen	Palearctic	Portugal	Azores	Terceira	Praia da Vitória	Paul da Praia da Vitória	38°44'5.915"N, 27°3'36.131"W	38.735	-27.06	WGS84	6	10	2013.12.18	2013	LIFECWR TEAM	8	Animalia	Chordata	Aves	Anseriformes	Anatidae	Anas	penelope		Anas penelope	Linnaeus, 1758	Anas penelope Linnaeus, 1758	species	Sofia Goulart, Mariana R. Brito and Sónia Santos	2013
1460	FieldObservation	https://creativecommons.org/licenses/by/4.0/legalcode	UAc	0a80feca-b411-428a-a34e-c5c2fa07cdba	Birds from Praia da Vitória marshes (Terceira, Azores, Portugal)	ObservedSpecimen	Palearctic	Portugal	Azores	Terceira	Praia da Vitória	Paul da Praia da Vitória	38°44'5.915"N, 27°3'36.131"W	38.735	-27.06	WGS84	6	10	2013.12.19	2013	LIFECWR TEAM	6	Animalia	Chordata	Aves	Anseriformes	Anatidae	Anas	penelope		Anas penelope	Linnaeus, 1758	Anas penelope Linnaeus, 1758	species	Sofia Goulart, Mariana R. Brito and Sónia Santos	2013
1480	FieldObservation	https://creativecommons.org/licenses/by/4.0/legalcode	UAc	0a80feca-b411-428a-a34e-c5c2fa07cdba	Birds from Praia da Vitória marshes (Terceira, Azores, Portugal)	ObservedSpecimen	Palearctic	Portugal	Azores	Terceira	Praia da Vitória	Paul da Praia da Vitória	38°44'5.915"N, 27°3'36.131"W	38.735	-27.06	WGS84	6	10	2013.12.2	2013	LIFECWR TEAM	5	Animalia	Chordata	Aves	Anseriformes	Anatidae	Anas	penelope		Anas penelope	Linnaeus, 1758	Anas penelope Linnaeus, 1758	species	Sofia Goulart, Mariana R. Brito and Sónia Santos	2013
1496	FieldObservation	https://creativecommons.org/licenses/by/4.0/legalcode	UAc	0a80feca-b411-428a-a34e-c5c2fa07cdba	Birds from Praia da Vitória marshes (Terceira, Azores, Portugal)	ObservedSpecimen	Palearctic	Portugal	Azores	Terceira	Praia da Vitória	Paul da Praia da Vitória	38°44'5.915"N, 27°3'36.131"W	38.735	-27.06	WGS84	6	10	2013.12.20	2013	LIFECWR TEAM	4	Animalia	Chordata	Aves	Anseriformes	Anatidae	Anas	penelope		Anas penelope	Linnaeus, 1758	Anas penelope Linnaeus, 1758	species	Sofia Goulart, Mariana R. Brito and Sónia Santos	2013
1530	FieldObservation	https://creativecommons.org/licenses/by/4.0/legalcode	UAc	0a80feca-b411-428a-a34e-c5c2fa07cdba	Birds from Praia da Vitória marshes (Terceira, Azores, Portugal)	ObservedSpecimen	Palearctic	Portugal	Azores	Terceira	Praia da Vitória	Paul da Praia da Vitória	38°44'5.915"N, 27°3'36.131"W	38.735	-27.06	WGS84	6	10	2013.12.27	2013	LIFECWR TEAM	7	Animalia	Chordata	Aves	Anseriformes	Anatidae	Anas	penelope		Anas penelope	Linnaeus, 1758	Anas penelope Linnaeus, 1758	species	Sofia Goulart, Mariana R. Brito and Sónia Santos	2013
1540	FieldObservation	https://creativecommons.org/licenses/by/4.0/legalcode	UAc	0a80feca-b411-428a-a34e-c5c2fa07cdba	Birds from Praia da Vitória marshes (Terceira, Azores, Portugal)	ObservedSpecimen	Palearctic	Portugal	Azores	Terceira	Praia da Vitória	Paul da Praia da Vitória	38°44'5.915"N, 27°3'36.131"W	38.735	-27.06	WGS84	6	10	2013.12.30	2013	LIFECWR TEAM	4	Animalia	Chordata	Aves	Anseriformes	Anatidae	Anas	penelope		Anas penelope	Linnaeus, 1758	Anas penelope Linnaeus, 1758	species	Sofia Goulart, Mariana R. Brito and Sónia Santos	2013
1604	FieldObservation	https://creativecommons.org/licenses/by/4.0/legalcode	UAc	0a80feca-b411-428a-a34e-c5c2fa07cdba	Birds from Praia da Vitória marshes (Terceira, Azores, Portugal)	ObservedSpecimen	Palearctic	Portugal	Azores	Terceira	Praia da Vitória	Paul da Praia da Vitória	38°44'5.915"N, 27°3'36.131"W	38.735	-27.06	WGS84	6	10	2013.12.9	2013	LIFECWR TEAM	2	Animalia	Chordata	Aves	Anseriformes	Anatidae	Anas	penelope		Anas penelope	Linnaeus, 1758	Anas penelope Linnaeus, 1758	species	Sofia Goulart, Mariana R. Brito and Sónia Santos	2013
2089	FieldObservation	https://creativecommons.org/licenses/by/4.0/legalcode	UAc	0a80feca-b411-428a-a34e-c5c2fa07cdba	Birds from Praia da Vitória marshes (Terceira, Azores, Portugal)	ObservedSpecimen	Palearctic	Portugal	Azores	Terceira	Praia da Vitória	Paul da Praia da Vitória	38°44'5.915"N, 27°3'36.131"W	38.735	-27.06	WGS84	6	10	2014.1.10	2014	LIFECWR TEAM	4	Animalia	Chordata	Aves	Anseriformes	Anatidae	Anas	penelope		Anas penelope	Linnaeus, 1758	Anas penelope Linnaeus, 1758	species	Sofia Goulart, Mariana R. Brito and Sónia Santos	2014
2096	FieldObservation	https://creativecommons.org/licenses/by/4.0/legalcode	UAc	0a80feca-b411-428a-a34e-c5c2fa07cdba	Birds from Praia da Vitória marshes (Terceira, Azores, Portugal)	ObservedSpecimen	Palearctic	Portugal	Azores	Terceira	Praia da Vitória	Paul da Praia da Vitória	38°44'5.915"N, 27°3'36.131"W	38.735	-27.06	WGS84	6	10	2014.1.13	2014	LIFECWR TEAM	12	Animalia	Chordata	Aves	Anseriformes	Anatidae	Anas	penelope		Anas penelope	Linnaeus, 1758	Anas penelope Linnaeus, 1758	species	Sofia Goulart, Mariana R. Brito and Sónia Santos	2014
2119	FieldObservation	https://creativecommons.org/licenses/by/4.0/legalcode	UAc	0a80feca-b411-428a-a34e-c5c2fa07cdba	Birds from Praia da Vitória marshes (Terceira, Azores, Portugal)	ObservedSpecimen	Palearctic	Portugal	Azores	Terceira	Praia da Vitória	Paul da Praia da Vitória	38°44'5.915"N, 27°3'36.131"W	38.735	-27.06	WGS84	6	10	2014.1.15	2014	LIFECWR TEAM	7	Animalia	Chordata	Aves	Anseriformes	Anatidae	Anas	penelope		Anas penelope	Linnaeus, 1758	Anas penelope Linnaeus, 1758	species	Sofia Goulart, Mariana R. Brito and Sónia Santos	2014
2141	FieldObservation	https://creativecommons.org/licenses/by/4.0/legalcode	UAc	0a80feca-b411-428a-a34e-c5c2fa07cdba	Birds from Praia da Vitória marshes (Terceira, Azores, Portugal)	ObservedSpecimen	Palearctic	Portugal	Azores	Terceira	Praia da Vitória	Paul da Praia da Vitória	38°44'5.915"N, 27°3'36.131"W	38.735	-27.06	WGS84	6	10	2014.1.16	2014	LIFECWR TEAM	1	Animalia	Chordata	Aves	Anseriformes	Anatidae	Anas	penelope		Anas penelope	Linnaeus, 1758	Anas penelope Linnaeus, 1758	species	Sofia Goulart, Mariana R. Brito and Sónia Santos	2014
2157	FieldObservation	https://creativecommons.org/licenses/by/4.0/legalcode	UAc	0a80feca-b411-428a-a34e-c5c2fa07cdba	Birds from Praia da Vitória marshes (Terceira, Azores, Portugal)	ObservedSpecimen	Palearctic	Portugal	Azores	Terceira	Praia da Vitória	Paul da Praia da Vitória	38°44'5.915"N, 27°3'36.131"W	38.735	-27.06	WGS84	6	10	2014.1.2	2014	LIFECWR TEAM	5	Animalia	Chordata	Aves	Anseriformes	Anatidae	Anas	penelope		Anas penelope	Linnaeus, 1758	Anas penelope Linnaeus, 1758	species	Sofia Goulart, Mariana R. Brito and Sónia Santos	2014
2176	FieldObservation	https://creativecommons.org/licenses/by/4.0/legalcode	UAc	0a80feca-b411-428a-a34e-c5c2fa07cdba	Birds from Praia da Vitória marshes (Terceira, Azores, Portugal)	ObservedSpecimen	Palearctic	Portugal	Azores	Terceira	Praia da Vitória	Paul da Praia da Vitória	38°44'5.915"N, 27°3'36.131"W	38.735	-27.06	WGS84	6	10	2014.1.20	2014	LIFECWR TEAM	4	Animalia	Chordata	Aves	Anseriformes	Anatidae	Anas	penelope		Anas penelope	Linnaeus, 1758	Anas penelope Linnaeus, 1758	species	Sofia Goulart, Mariana R. Brito and Sónia Santos	2014
2200	FieldObservation	https://creativecommons.org/licenses/by/4.0/legalcode	UAc	0a80feca-b411-428a-a34e-c5c2fa07cdba	Birds from Praia da Vitória marshes (Terceira, Azores, Portugal)	ObservedSpecimen	Palearctic	Portugal	Azores	Terceira	Praia da Vitória	Paul da Praia da Vitória	38°44'5.915"N, 27°3'36.131"W	38.735	-27.06	WGS84	6	10	2014.1.21	2014	LIFECWR TEAM	1	Animalia	Chordata	Aves	Anseriformes	Anatidae	Anas	penelope		Anas penelope	Linnaeus, 1758	Anas penelope Linnaeus, 1758	species	Sofia Goulart, Mariana R. Brito and Sónia Santos	2014
2218	FieldObservation	https://creativecommons.org/licenses/by/4.0/legalcode	UAc	0a80feca-b411-428a-a34e-c5c2fa07cdba	Birds from Praia da Vitória marshes (Terceira, Azores, Portugal)	ObservedSpecimen	Palearctic	Portugal	Azores	Terceira	Praia da Vitória	Paul da Praia da Vitória	38°44'5.915"N, 27°3'36.131"W	38.735	-27.06	WGS84	6	10	2014.1.22	2014	LIFECWR TEAM	4	Animalia	Chordata	Aves	Anseriformes	Anatidae	Anas	penelope		Anas penelope	Linnaeus, 1758	Anas penelope Linnaeus, 1758	species	Sofia Goulart, Mariana R. Brito and Sónia Santos	2014
2241	FieldObservation	https://creativecommons.org/licenses/by/4.0/legalcode	UAc	0a80feca-b411-428a-a34e-c5c2fa07cdba	Birds from Praia da Vitória marshes (Terceira, Azores, Portugal)	ObservedSpecimen	Palearctic	Portugal	Azores	Terceira	Praia da Vitória	Paul da Praia da Vitória	38°44'5.915"N, 27°3'36.131"W	38.735	-27.06	WGS84	6	10	2014.1.23	2014	LIFECWR TEAM	3	Animalia	Chordata	Aves	Anseriformes	Anatidae	Anas	penelope		Anas penelope	Linnaeus, 1758	Anas penelope Linnaeus, 1758	species	Sofia Goulart, Mariana R. Brito and Sónia Santos	2014
2261	FieldObservation	https://creativecommons.org/licenses/by/4.0/legalcode	UAc	0a80feca-b411-428a-a34e-c5c2fa07cdba	Birds from Praia da Vitória marshes (Terceira, Azores, Portugal)	ObservedSpecimen	Palearctic	Portugal	Azores	Terceira	Praia da Vitória	Paul da Praia da Vitória	38°44'5.915"N, 27°3'36.131"W	38.735	-27.06	WGS84	6	10	2014.1.28	2014	LIFECWR TEAM	6	Animalia	Chordata	Aves	Anseriformes	Anatidae	Anas	penelope		Anas penelope	Linnaeus, 1758	Anas penelope Linnaeus, 1758	species	Sofia Goulart, Mariana R. Brito and Sónia Santos	2014
2286	FieldObservation	https://creativecommons.org/licenses/by/4.0/legalcode	UAc	0a80feca-b411-428a-a34e-c5c2fa07cdba	Birds from Praia da Vitória marshes (Terceira, Azores, Portugal)	ObservedSpecimen	Palearctic	Portugal	Azores	Terceira	Praia da Vitória	Paul da Praia da Vitória	38°44'5.915"N, 27°3'36.131"W	38.735	-27.06	WGS84	6	10	2014.1.29	2014	LIFECWR TEAM	6	Animalia	Chordata	Aves	Anseriformes	Anatidae	Anas	penelope		Anas penelope	Linnaeus, 1758	Anas penelope Linnaeus, 1758	species	Sofia Goulart, Mariana R. Brito and Sónia Santos	2014
2318	FieldObservation	https://creativecommons.org/licenses/by/4.0/legalcode	UAc	0a80feca-b411-428a-a34e-c5c2fa07cdba	Birds from Praia da Vitória marshes (Terceira, Azores, Portugal)	ObservedSpecimen	Palearctic	Portugal	Azores	Terceira	Praia da Vitória	Paul da Praia da Vitória	38°44'5.915"N, 27°3'36.131"W	38.735	-27.06	WGS84	6	10	2014.1.6	2014	LIFECWR TEAM	4	Animalia	Chordata	Aves	Anseriformes	Anatidae	Anas	penelope		Anas penelope	Linnaeus, 1758	Anas penelope Linnaeus, 1758	species	Sofia Goulart, Mariana R. Brito and Sónia Santos	2014
2349	FieldObservation	https://creativecommons.org/licenses/by/4.0/legalcode	UAc	0a80feca-b411-428a-a34e-c5c2fa07cdba	Birds from Praia da Vitória marshes (Terceira, Azores, Portugal)	ObservedSpecimen	Palearctic	Portugal	Azores	Terceira	Praia da Vitória	Paul da Praia da Vitória	38°44'5.915"N, 27°3'36.131"W	38.735	-27.06	WGS84	6	10	2014.1.9	2014	LIFECWR TEAM	4	Animalia	Chordata	Aves	Anseriformes	Anatidae	Anas	penelope		Anas penelope	Linnaeus, 1758	Anas penelope Linnaeus, 1758	species	Sofia Goulart, Mariana R. Brito and Sónia Santos	2014
2386	FieldObservation	https://creativecommons.org/licenses/by/4.0/legalcode	UAc	0a80feca-b411-428a-a34e-c5c2fa07cdba	Birds from Praia da Vitória marshes (Terceira, Azores, Portugal)	ObservedSpecimen	Palearctic	Portugal	Azores	Terceira	Praia da Vitória	Paul da Praia da Vitória	38°44'5.915"N, 27°3'36.131"W	38.735	-27.06	WGS84	6	10	2014.10.10	2014	LIFECWR TEAM	3	Animalia	Chordata	Aves	Anseriformes	Anatidae	Anas	penelope		Anas penelope	Linnaeus, 1758	Anas penelope Linnaeus, 1758	species	Sofia Goulart, Mariana R. Brito and Sónia Santos	2014
2404	FieldObservation	https://creativecommons.org/licenses/by/4.0/legalcode	UAc	0a80feca-b411-428a-a34e-c5c2fa07cdba	Birds from Praia da Vitória marshes (Terceira, Azores, Portugal)	ObservedSpecimen	Palearctic	Portugal	Azores	Terceira	Praia da Vitória	Paul da Praia da Vitória	38°44'5.915"N, 27°3'36.131"W	38.735	-27.06	WGS84	6	10	2014.10.13	2014	LIFECWR TEAM	2	Animalia	Chordata	Aves	Anseriformes	Anatidae	Anas	penelope		Anas penelope	Linnaeus, 1758	Anas penelope Linnaeus, 1758	species	Sofia Goulart, Mariana R. Brito and Sónia Santos	2014
2435	FieldObservation	https://creativecommons.org/licenses/by/4.0/legalcode	UAc	0a80feca-b411-428a-a34e-c5c2fa07cdba	Birds from Praia da Vitória marshes (Terceira, Azores, Portugal)	ObservedSpecimen	Palearctic	Portugal	Azores	Terceira	Praia da Vitória	Paul da Praia da Vitória	38°44'5.915"N, 27°3'36.131"W	38.735	-27.06	WGS84	6	10	2014.10.16	2014	LIFECWR TEAM	3	Animalia	Chordata	Aves	Anseriformes	Anatidae	Anas	penelope		Anas penelope	Linnaeus, 1758	Anas penelope Linnaeus, 1758	species	Sofia Goulart, Mariana R. Brito and Sónia Santos	2014
2453	FieldObservation	https://creativecommons.org/licenses/by/4.0/legalcode	UAc	0a80feca-b411-428a-a34e-c5c2fa07cdba	Birds from Praia da Vitória marshes (Terceira, Azores, Portugal)	ObservedSpecimen	Palearctic	Portugal	Azores	Terceira	Praia da Vitória	Paul da Praia da Vitória	38°44'5.915"N, 27°3'36.131"W	38.735	-27.06	WGS84	6	10	2014.10.17	2014	LIFECWR TEAM	1	Animalia	Chordata	Aves	Anseriformes	Anatidae	Anas	penelope		Anas penelope	Linnaeus, 1758	Anas penelope Linnaeus, 1758	species	Sofia Goulart, Mariana R. Brito and Sónia Santos	2014
2490	FieldObservation	https://creativecommons.org/licenses/by/4.0/legalcode	UAc	0a80feca-b411-428a-a34e-c5c2fa07cdba	Birds from Praia da Vitória marshes (Terceira, Azores, Portugal)	ObservedSpecimen	Palearctic	Portugal	Azores	Terceira	Praia da Vitória	Paul da Praia da Vitória	38°44'5.915"N, 27°3'36.131"W	38.735	-27.06	WGS84	6	10	2014.10.21	2014	LIFECWR TEAM	2	Animalia	Chordata	Aves	Anseriformes	Anatidae	Anas	penelope		Anas penelope	Linnaeus, 1758	Anas penelope Linnaeus, 1758	species	Sofia Goulart, Mariana R. Brito and Sónia Santos	2014
2735	FieldObservation	https://creativecommons.org/licenses/by/4.0/legalcode	UAc	0a80feca-b411-428a-a34e-c5c2fa07cdba	Birds from Praia da Vitória marshes (Terceira, Azores, Portugal)	ObservedSpecimen	Palearctic	Portugal	Azores	Terceira	Praia da Vitória	Paul da Praia da Vitória	38°44'5.915"N, 27°3'36.131"W	38.735	-27.06	WGS84	6	10	2014.11.11	2014	LIFECWR TEAM	2	Animalia	Chordata	Aves	Anseriformes	Anatidae	Anas	penelope		Anas penelope	Linnaeus, 1758	Anas penelope Linnaeus, 1758	species	Sofia Goulart, Mariana R. Brito and Sónia Santos	2014
2756	FieldObservation	https://creativecommons.org/licenses/by/4.0/legalcode	UAc	0a80feca-b411-428a-a34e-c5c2fa07cdba	Birds from Praia da Vitória marshes (Terceira, Azores, Portugal)	ObservedSpecimen	Palearctic	Portugal	Azores	Terceira	Praia da Vitória	Paul da Praia da Vitória	38°44'5.915"N, 27°3'36.131"W	38.735	-27.06	WGS84	6	10	2014.11.12	2014	LIFECWR TEAM	2	Animalia	Chordata	Aves	Anseriformes	Anatidae	Anas	penelope		Anas penelope	Linnaeus, 1758	Anas penelope Linnaeus, 1758	species	Sofia Goulart, Mariana R. Brito and Sónia Santos	2014
2782	FieldObservation	https://creativecommons.org/licenses/by/4.0/legalcode	UAc	0a80feca-b411-428a-a34e-c5c2fa07cdba	Birds from Praia da Vitória marshes (Terceira, Azores, Portugal)	ObservedSpecimen	Palearctic	Portugal	Azores	Terceira	Praia da Vitória	Paul da Praia da Vitória	38°44'5.915"N, 27°3'36.131"W	38.735	-27.06	WGS84	6	10	2014.11.13	2014	LIFECWR TEAM	2	Animalia	Chordata	Aves	Anseriformes	Anatidae	Anas	penelope		Anas penelope	Linnaeus, 1758	Anas penelope Linnaeus, 1758	species	Sofia Goulart, Mariana R. Brito and Sónia Santos	2014
2805	FieldObservation	https://creativecommons.org/licenses/by/4.0/legalcode	UAc	0a80feca-b411-428a-a34e-c5c2fa07cdba	Birds from Praia da Vitória marshes (Terceira, Azores, Portugal)	ObservedSpecimen	Palearctic	Portugal	Azores	Terceira	Praia da Vitória	Paul da Praia da Vitória	38°44'5.915"N, 27°3'36.131"W	38.735	-27.06	WGS84	6	10	2014.11.14	2014	LIFECWR TEAM	4	Animalia	Chordata	Aves	Anseriformes	Anatidae	Anas	penelope		Anas penelope	Linnaeus, 1758	Anas penelope Linnaeus, 1758	species	Sofia Goulart, Mariana R. Brito and Sónia Santos	2014
2842	FieldObservation	https://creativecommons.org/licenses/by/4.0/legalcode	UAc	0a80feca-b411-428a-a34e-c5c2fa07cdba	Birds from Praia da Vitória marshes (Terceira, Azores, Portugal)	ObservedSpecimen	Palearctic	Portugal	Azores	Terceira	Praia da Vitória	Paul da Praia da Vitória	38°44'5.915"N, 27°3'36.131"W	38.735	-27.06	WGS84	6	10	2014.11.25	2014	LIFECWR TEAM	3	Animalia	Chordata	Aves	Anseriformes	Anatidae	Anas	penelope		Anas penelope	Linnaeus, 1758	Anas penelope Linnaeus, 1758	species	Sofia Goulart, Mariana R. Brito and Sónia Santos	2014
2846	FieldObservation	https://creativecommons.org/licenses/by/4.0/legalcode	UAc	0a80feca-b411-428a-a34e-c5c2fa07cdba	Birds from Praia da Vitória marshes (Terceira, Azores, Portugal)	ObservedSpecimen	Palearctic	Portugal	Azores	Terceira	Praia da Vitória	Paul da Praia da Vitória	38°44'5.915"N, 27°3'36.131"W	38.735	-27.06	WGS84	6	10	2014.11.26	2014	LIFECWR TEAM	3	Animalia	Chordata	Aves	Anseriformes	Anatidae	Anas	penelope		Anas penelope	Linnaeus, 1758	Anas penelope Linnaeus, 1758	species	Sofia Goulart, Mariana R. Brito and Sónia Santos	2014
2892	FieldObservation	https://creativecommons.org/licenses/by/4.0/legalcode	UAc	0a80feca-b411-428a-a34e-c5c2fa07cdba	Birds from Praia da Vitória marshes (Terceira, Azores, Portugal)	ObservedSpecimen	Palearctic	Portugal	Azores	Terceira	Praia da Vitória	Paul da Praia da Vitória	38°44'5.915"N, 27°3'36.131"W	38.735	-27.06	WGS84	6	10	2014.11.4	2014	LIFECWR TEAM	5	Animalia	Chordata	Aves	Anseriformes	Anatidae	Anas	penelope		Anas penelope	Linnaeus, 1758	Anas penelope Linnaeus, 1758	species	Sofia Goulart, Mariana R. Brito and Sónia Santos	2014
2935	FieldObservation	https://creativecommons.org/licenses/by/4.0/legalcode	UAc	0a80feca-b411-428a-a34e-c5c2fa07cdba	Birds from Praia da Vitória marshes (Terceira, Azores, Portugal)	ObservedSpecimen	Palearctic	Portugal	Azores	Terceira	Praia da Vitória	Paul da Praia da Vitória	38°44'5.915"N, 27°3'36.131"W	38.735	-27.06	WGS84	6	10	2014.11.7	2014	LIFECWR TEAM	2	Animalia	Chordata	Aves	Anseriformes	Anatidae	Anas	penelope		Anas penelope	Linnaeus, 1758	Anas penelope Linnaeus, 1758	species	Sofia Goulart, Mariana R. Brito and Sónia Santos	2014
2965	FieldObservation	https://creativecommons.org/licenses/by/4.0/legalcode	UAc	0a80feca-b411-428a-a34e-c5c2fa07cdba	Birds from Praia da Vitória marshes (Terceira, Azores, Portugal)	ObservedSpecimen	Palearctic	Portugal	Azores	Terceira	Praia da Vitória	Paul da Praia da Vitória	38°44'5.915"N, 27°3'36.131"W	38.735	-27.06	WGS84	6	10	2014.12.4	2014	LIFECWR TEAM	4	Animalia	Chordata	Aves	Anseriformes	Anatidae	Anas	penelope		Anas penelope	Linnaeus, 1758	Anas penelope Linnaeus, 1758	species	Sofia Goulart, Mariana R. Brito and Sónia Santos	2014
2977	FieldObservation	https://creativecommons.org/licenses/by/4.0/legalcode	UAc	0a80feca-b411-428a-a34e-c5c2fa07cdba	Birds from Praia da Vitória marshes (Terceira, Azores, Portugal)	ObservedSpecimen	Palearctic	Portugal	Azores	Terceira	Praia da Vitória	Paul da Praia da Vitória	38°44'5.915"N, 27°3'36.131"W	38.735	-27.06	WGS84	6	10	2014.2.10	2014	LIFECWR TEAM	5	Animalia	Chordata	Aves	Anseriformes	Anatidae	Anas	penelope		Anas penelope	Linnaeus, 1758	Anas penelope Linnaeus, 1758	species	Sofia Goulart, Mariana R. Brito and Sónia Santos	2014
2996	FieldObservation	https://creativecommons.org/licenses/by/4.0/legalcode	UAc	0a80feca-b411-428a-a34e-c5c2fa07cdba	Birds from Praia da Vitória marshes (Terceira, Azores, Portugal)	ObservedSpecimen	Palearctic	Portugal	Azores	Terceira	Praia da Vitória	Paul da Praia da Vitória	38°44'5.915"N, 27°3'36.131"W	38.735	-27.06	WGS84	6	10	2014.2.11	2014	LIFECWR TEAM	7	Animalia	Chordata	Aves	Anseriformes	Anatidae	Anas	penelope		Anas penelope	Linnaeus, 1758	Anas penelope Linnaeus, 1758	species	Sofia Goulart, Mariana R. Brito and Sónia Santos	2014
3018	FieldObservation	https://creativecommons.org/licenses/by/4.0/legalcode	UAc	0a80feca-b411-428a-a34e-c5c2fa07cdba	Birds from Praia da Vitória marshes (Terceira, Azores, Portugal)	ObservedSpecimen	Palearctic	Portugal	Azores	Terceira	Praia da Vitória	Paul da Praia da Vitória	38°44'5.915"N, 27°3'36.131"W	38.735	-27.06	WGS84	6	10	2014.2.12	2014	LIFECWR TEAM	9	Animalia	Chordata	Aves	Anseriformes	Anatidae	Anas	penelope		Anas penelope	Linnaeus, 1758	Anas penelope Linnaeus, 1758	species	Sofia Goulart, Mariana R. Brito and Sónia Santos	2014
3037	FieldObservation	https://creativecommons.org/licenses/by/4.0/legalcode	UAc	0a80feca-b411-428a-a34e-c5c2fa07cdba	Birds from Praia da Vitória marshes (Terceira, Azores, Portugal)	ObservedSpecimen	Palearctic	Portugal	Azores	Terceira	Praia da Vitória	Paul da Praia da Vitória	38°44'5.915"N, 27°3'36.131"W	38.735	-27.06	WGS84	6	10	2014.2.13	2014	LIFECWR TEAM	6	Animalia	Chordata	Aves	Anseriformes	Anatidae	Anas	penelope		Anas penelope	Linnaeus, 1758	Anas penelope Linnaeus, 1758	species	Sofia Goulart, Mariana R. Brito and Sónia Santos	2014
3056	FieldObservation	https://creativecommons.org/licenses/by/4.0/legalcode	UAc	0a80feca-b411-428a-a34e-c5c2fa07cdba	Birds from Praia da Vitória marshes (Terceira, Azores, Portugal)	ObservedSpecimen	Palearctic	Portugal	Azores	Terceira	Praia da Vitória	Paul da Praia da Vitória	38°44'5.915"N, 27°3'36.131"W	38.735	-27.06	WGS84	6	10	2014.2.17	2014	LIFECWR TEAM	5	Animalia	Chordata	Aves	Anseriformes	Anatidae	Anas	penelope		Anas penelope	Linnaeus, 1758	Anas penelope Linnaeus, 1758	species	Sofia Goulart, Mariana R. Brito and Sónia Santos	2014
3074	FieldObservation	https://creativecommons.org/licenses/by/4.0/legalcode	UAc	0a80feca-b411-428a-a34e-c5c2fa07cdba	Birds from Praia da Vitória marshes (Terceira, Azores, Portugal)	ObservedSpecimen	Palearctic	Portugal	Azores	Terceira	Praia da Vitória	Paul da Praia da Vitória	38°44'5.915"N, 27°3'36.131"W	38.735	-27.06	WGS84	6	10	2014.2.19	2014	LIFECWR TEAM	4	Animalia	Chordata	Aves	Anseriformes	Anatidae	Anas	penelope		Anas penelope	Linnaeus, 1758	Anas penelope Linnaeus, 1758	species	Sofia Goulart, Mariana R. Brito and Sónia Santos	2014
3094	FieldObservation	https://creativecommons.org/licenses/by/4.0/legalcode	UAc	0a80feca-b411-428a-a34e-c5c2fa07cdba	Birds from Praia da Vitória marshes (Terceira, Azores, Portugal)	ObservedSpecimen	Palearctic	Portugal	Azores	Terceira	Praia da Vitória	Paul da Praia da Vitória	38°44'5.915"N, 27°3'36.131"W	38.735	-27.06	WGS84	6	10	2014.2.20	2014	LIFECWR TEAM	5	Animalia	Chordata	Aves	Anseriformes	Anatidae	Anas	penelope		Anas penelope	Linnaeus, 1758	Anas penelope Linnaeus, 1758	species	Sofia Goulart, Mariana R. Brito and Sónia Santos	2014
3133	FieldObservation	https://creativecommons.org/licenses/by/4.0/legalcode	UAc	0a80feca-b411-428a-a34e-c5c2fa07cdba	Birds from Praia da Vitória marshes (Terceira, Azores, Portugal)	ObservedSpecimen	Palearctic	Portugal	Azores	Terceira	Praia da Vitória	Paul da Praia da Vitória	38°44'5.915"N, 27°3'36.131"W	38.735	-27.06	WGS84	6	10	2014.2.24	2014	LIFECWR TEAM	4	Animalia	Chordata	Aves	Anseriformes	Anatidae	Anas	penelope		Anas penelope	Linnaeus, 1758	Anas penelope Linnaeus, 1758	species	Sofia Goulart, Mariana R. Brito and Sónia Santos	2014
3153	FieldObservation	https://creativecommons.org/licenses/by/4.0/legalcode	UAc	0a80feca-b411-428a-a34e-c5c2fa07cdba	Birds from Praia da Vitória marshes (Terceira, Azores, Portugal)	ObservedSpecimen	Palearctic	Portugal	Azores	Terceira	Praia da Vitória	Paul da Praia da Vitória	38°44'5.915"N, 27°3'36.131"W	38.735	-27.06	WGS84	6	10	2014.2.25	2014	LIFECWR TEAM	4	Animalia	Chordata	Aves	Anseriformes	Anatidae	Anas	penelope		Anas penelope	Linnaeus, 1758	Anas penelope Linnaeus, 1758	species	Sofia Goulart, Mariana R. Brito and Sónia Santos	2014
3173	FieldObservation	https://creativecommons.org/licenses/by/4.0/legalcode	UAc	0a80feca-b411-428a-a34e-c5c2fa07cdba	Birds from Praia da Vitória marshes (Terceira, Azores, Portugal)	ObservedSpecimen	Palearctic	Portugal	Azores	Terceira	Praia da Vitória	Paul da Praia da Vitória	38°44'5.915"N, 27°3'36.131"W	38.735	-27.06	WGS84	6	10	2014.2.26	2014	LIFECWR TEAM	4	Animalia	Chordata	Aves	Anseriformes	Anatidae	Anas	penelope		Anas penelope	Linnaeus, 1758	Anas penelope Linnaeus, 1758	species	Sofia Goulart, Mariana R. Brito and Sónia Santos	2014
3187	FieldObservation	https://creativecommons.org/licenses/by/4.0/legalcode	UAc	0a80feca-b411-428a-a34e-c5c2fa07cdba	Birds from Praia da Vitória marshes (Terceira, Azores, Portugal)	ObservedSpecimen	Palearctic	Portugal	Azores	Terceira	Praia da Vitória	Paul da Praia da Vitória	38°44'5.915"N, 27°3'36.131"W	38.735	-27.06	WGS84	6	10	2014.2.27	2014	LIFECWR TEAM	5	Animalia	Chordata	Aves	Anseriformes	Anatidae	Anas	penelope		Anas penelope	Linnaeus, 1758	Anas penelope Linnaeus, 1758	species	Sofia Goulart, Mariana R. Brito and Sónia Santos	2014
3208	FieldObservation	https://creativecommons.org/licenses/by/4.0/legalcode	UAc	0a80feca-b411-428a-a34e-c5c2fa07cdba	Birds from Praia da Vitória marshes (Terceira, Azores, Portugal)	ObservedSpecimen	Palearctic	Portugal	Azores	Terceira	Praia da Vitória	Paul da Praia da Vitória	38°44'5.915"N, 27°3'36.131"W	38.735	-27.06	WGS84	6	10	2014.2.28	2014	LIFECWR TEAM	2	Animalia	Chordata	Aves	Anseriformes	Anatidae	Anas	penelope		Anas penelope	Linnaeus, 1758	Anas penelope Linnaeus, 1758	species	Sofia Goulart, Mariana R. Brito and Sónia Santos	2014
3237	FieldObservation	https://creativecommons.org/licenses/by/4.0/legalcode	UAc	0a80feca-b411-428a-a34e-c5c2fa07cdba	Birds from Praia da Vitória marshes (Terceira, Azores, Portugal)	ObservedSpecimen	Palearctic	Portugal	Azores	Terceira	Praia da Vitória	Paul da Praia da Vitória	38°44'5.915"N, 27°3'36.131"W	38.735	-27.06	WGS84	6	10	2014.2.6	2014	LIFECWR TEAM	8	Animalia	Chordata	Aves	Anseriformes	Anatidae	Anas	penelope		Anas penelope	Linnaeus, 1758	Anas penelope Linnaeus, 1758	species	Sofia Goulart, Mariana R. Brito and Sónia Santos	2014
3256	FieldObservation	https://creativecommons.org/licenses/by/4.0/legalcode	UAc	0a80feca-b411-428a-a34e-c5c2fa07cdba	Birds from Praia da Vitória marshes (Terceira, Azores, Portugal)	ObservedSpecimen	Palearctic	Portugal	Azores	Terceira	Praia da Vitória	Paul da Praia da Vitória	38°44'5.915"N, 27°3'36.131"W	38.735	-27.06	WGS84	6	10	2014.3.10	2014	LIFECWR TEAM	3	Animalia	Chordata	Aves	Anseriformes	Anatidae	Anas	penelope		Anas penelope	Linnaeus, 1758	Anas penelope Linnaeus, 1758	species	Sofia Goulart, Mariana R. Brito and Sónia Santos	2014
3271	FieldObservation	https://creativecommons.org/licenses/by/4.0/legalcode	UAc	0a80feca-b411-428a-a34e-c5c2fa07cdba	Birds from Praia da Vitória marshes (Terceira, Azores, Portugal)	ObservedSpecimen	Palearctic	Portugal	Azores	Terceira	Praia da Vitória	Paul da Praia da Vitória	38°44'5.915"N, 27°3'36.131"W	38.735	-27.06	WGS84	6	10	2014.3.11	2014	LIFECWR TEAM	4	Animalia	Chordata	Aves	Anseriformes	Anatidae	Anas	penelope		Anas penelope	Linnaeus, 1758	Anas penelope Linnaeus, 1758	species	Sofia Goulart, Mariana R. Brito and Sónia Santos	2014
3299	FieldObservation	https://creativecommons.org/licenses/by/4.0/legalcode	UAc	0a80feca-b411-428a-a34e-c5c2fa07cdba	Birds from Praia da Vitória marshes (Terceira, Azores, Portugal)	ObservedSpecimen	Palearctic	Portugal	Azores	Terceira	Praia da Vitória	Paul da Praia da Vitória	38°44'5.915"N, 27°3'36.131"W	38.735	-27.06	WGS84	6	10	2014.3.14	2014	LIFECWR TEAM	3	Animalia	Chordata	Aves	Anseriformes	Anatidae	Anas	penelope		Anas penelope	Linnaeus, 1758	Anas penelope Linnaeus, 1758	species	Sofia Goulart, Mariana R. Brito and Sónia Santos	2014
3318	FieldObservation	https://creativecommons.org/licenses/by/4.0/legalcode	UAc	0a80feca-b411-428a-a34e-c5c2fa07cdba	Birds from Praia da Vitória marshes (Terceira, Azores, Portugal)	ObservedSpecimen	Palearctic	Portugal	Azores	Terceira	Praia da Vitória	Paul da Praia da Vitória	38°44'5.915"N, 27°3'36.131"W	38.735	-27.06	WGS84	6	10	2014.3.17	2014	LIFECWR TEAM	2	Animalia	Chordata	Aves	Anseriformes	Anatidae	Anas	penelope		Anas penelope	Linnaeus, 1758	Anas penelope Linnaeus, 1758	species	Sofia Goulart, Mariana R. Brito and Sónia Santos	2014
3348	FieldObservation	https://creativecommons.org/licenses/by/4.0/legalcode	UAc	0a80feca-b411-428a-a34e-c5c2fa07cdba	Birds from Praia da Vitória marshes (Terceira, Azores, Portugal)	ObservedSpecimen	Palearctic	Portugal	Azores	Terceira	Praia da Vitória	Paul da Praia da Vitória	38°44'5.915"N, 27°3'36.131"W	38.735	-27.06	WGS84	6	10	2014.3.20	2014	LIFECWR TEAM	4	Animalia	Chordata	Aves	Anseriformes	Anatidae	Anas	penelope		Anas penelope	Linnaeus, 1758	Anas penelope Linnaeus, 1758	species	Sofia Goulart, Mariana R. Brito and Sónia Santos	2014
[truncated: 11,802 more rows]
